# Supplementary material for: Causal relationships between immune cells, Blood Metabolites, and Alzheimer's disease: a two-step, two-sample Mendelian randomization study
Source: Research Square preprint supplement (doi:10.21203/rs.3.rs-8058099/v1), 2025-12-04
Supplement: Supplementary file 1 [file 7548d43c27c7004333830318.xlsx]

## Sheet: Table S1
Table S1: Data sourse for GWAS Summary
Phenotype	Consortium/DOI	Population	Case	Control	Link	Accession number
Alzheimer's disease	10.1038/s41588-022-01024-z	European	39106 clinically diagnosed cases, 46828 proxy cases	401577	https://gwas.mrcieu.ac.uk/datasets/ebi-a-GCST90027158/	ebi-a-GCST90027158
731 peripheral blood immune traits (118 absolute cell counts, 389 median fluorescence intensities, 32 morphological parameters, and 192 relative cell counts)	10.1038/s41588-020-0684-4	European	3757		https://opengwas.io/datasets/Accession number/	ebi-a-GCST90001391 to ebi-a-GCST90002121
1,400 blood metabolites (1091 blood metabolites and 309 metabolite ratios)	10.1017/s0714980809990055	Canada	8299		https://www.ebi.ac.uk/gwas/	ebi-a-GCST90199621 to ebi-a-GCST90201020

## Sheet: Table S2
Table S2: Extracted SNP of MR analysis( immune cell traits to Alzheimer's disease)
exposure	outcome	SNP	effect_allele.exposure	other_allele.exposure	effect_allele.outcome	other_allele.outcome	beta.exposure	se.exposure	pval.exposure	beta.outcome	pval.outcome	se.outcome	palindromic	mr_keep
DP (CD4+CD8+) AC	Alzheimer's disease	rs10002165	C	T	C	T	-0.3786	9.12494e-06	0.08521	0.0403	0.159	0.0286	FALSE	TRUE
DP (CD4+CD8+) AC	Alzheimer's disease	rs10851760	G	A	G	A	-0.1506	2.339e-06	0.03184	-0.015	0.0915609	0.0089	FALSE	TRUE
DP (CD4+CD8+) AC	Alzheimer's disease	rs11025036	A	G	A	G	-0.4567	3.35097e-08	0.08253	-0.0208	0.326	0.0212	FALSE	TRUE
DP (CD4+CD8+) AC	Alzheimer's disease	rs117166897	G	A	G	A	-0.2471	4.22795e-06	0.05363	-0.0323	0.3926	0.0377	FALSE	TRUE
DP (CD4+CD8+) AC	Alzheimer's disease	rs11725463	G	A	G	A	-0.2338	9.07006e-06	0.05261	0.01	0.5002	0.0149	FALSE	TRUE
DP (CD4+CD8+) AC	Alzheimer's disease	rs12142860	T	G	T	G	0.5894	4.96695e-06	0.1289	0.0285	0.3258	0.029	FALSE	TRUE
DP (CD4+CD8+) AC	Alzheimer's disease	rs147688743	A	G	A	G	-0.4601	3.45398e-06	0.09898	0.0047	0.8869	0.0331	FALSE	TRUE
DP (CD4+CD8+) AC	Alzheimer's disease	rs1764923	T	G	T	G	-0.1177	3.95704e-06	0.02548	0.0069	0.477	0.0097	FALSE	TRUE
DP (CD4+CD8+) AC	Alzheimer's disease	rs2857229	G	A	G	A	0.273	1.033e-22	0.02764	0.0091	0.2993	0.0088	FALSE	TRUE
DP (CD4+CD8+) AC	Alzheimer's disease	rs6022045	C	T	C	T	-0.1144	5.16202e-06	0.02505	0.0039	0.6292	0.0081	FALSE	TRUE
DP (CD4+CD8+) AC	Alzheimer's disease	rs62314120	A	G	A	G	0.1612	7.95994e-06	0.03605	0.0238	0.0559204	0.0124	FALSE	TRUE
DP (CD4+CD8+) AC	Alzheimer's disease	rs7141604	T	C	T	C	0.1146	7.82204e-06	0.0256	-0.0073	0.3876	0.0085	FALSE	TRUE
DP (CD4+CD8+) AC	Alzheimer's disease	rs7160965	C	T	C	T	0.1768	9.01509e-06	0.03976	-0.0067	0.6454	0.0145	FALSE	TRUE
DP (CD4+CD8+) AC	Alzheimer's disease	rs72694502	C	T	C	T	-0.3783	5.153e-06	0.08288	0.0247	0.4104	0.03	FALSE	TRUE
DP (CD4+CD8+) AC	Alzheimer's disease	rs75275131	G	A	G	A	0.6861	2.02899e-06	0.1442	0.0158	0.5911	0.0294	FALSE	TRUE
DP (CD4+CD8+) AC	Alzheimer's disease	rs77965313	C	A	C	A	-0.3127	1.82301e-06	0.06542	-0.0286	0.0897697	0.0169	FALSE	TRUE
DP (CD4+CD8+) AC	Alzheimer's disease	rs857241	G	T	G	T	-0.9906	4.40099e-06	0.2154	-0.0089	0.764499	0.0297	FALSE	TRUE
DP (CD4+CD8+) AC	Alzheimer's disease	rs9493240	A	G	A	G	0.1385	3.34904e-07	0.0271	0.0026	0.776201	0.009	FALSE	TRUE
TD DN (CD4-CD8-) %T cell	Alzheimer's disease	rs10003087	G	T	G	T	0.127	1.844e-06	0.02658	0.0088	0.2957	0.0084	FALSE	TRUE
TD DN (CD4-CD8-) %T cell	Alzheimer's disease	rs10876180	T	C	T	C	-0.1219	4.82903e-06	0.02662	0.0137	0.0926702	0.0082	FALSE	TRUE
TD DN (CD4-CD8-) %T cell	Alzheimer's disease	rs10920583	A	G	A	G	0.1148	7.13493e-06	0.02554	-0.0104	0.2006	0.0082	FALSE	TRUE
TD DN (CD4-CD8-) %T cell	Alzheimer's disease	rs111983490	A	G	A	G	-0.2166	3.73904e-09	0.03665	0.0244	0.1571	0.0173	FALSE	TRUE
TD DN (CD4-CD8-) %T cell	Alzheimer's disease	rs114892491	T	C	T	C	-0.2886	4.13304e-06	0.06257	0.0001	0.9972	0.0356	FALSE	TRUE
TD DN (CD4-CD8-) %T cell	Alzheimer's disease	rs117481225	C	T	C	T	-1.329	9.62809e-06	0.2999	-0.0076	0.8537	0.0413	FALSE	TRUE
TD DN (CD4-CD8-) %T cell	Alzheimer's disease	rs142421834	G	A	G	A	-0.493	7.90606e-06	0.1102	-0.0035	0.9108	0.0312	FALSE	TRUE
TD DN (CD4-CD8-) %T cell	Alzheimer's disease	rs146907982	A	G	A	G	0.2461	8.72891e-06	0.05526	0.0047	0.787501	0.0174	FALSE	TRUE
TD DN (CD4-CD8-) %T cell	Alzheimer's disease	rs17692789	A	C	A	C	0.4277	5.01996e-06	0.09356	-0.0278	0.1558	0.0196	FALSE	TRUE
TD DN (CD4-CD8-) %T cell	Alzheimer's disease	rs35706962	T	C	T	C	0.558	5.55495e-06	0.1226	-0.0118	0.4991	0.0175	FALSE	TRUE
TD DN (CD4-CD8-) %T cell	Alzheimer's disease	rs36060603	G	A	G	A	0.1294	5.11399e-07	0.02573	-0.0072	0.3803	0.0082	FALSE	TRUE
TD DN (CD4-CD8-) %T cell	Alzheimer's disease	rs541367304	A	G	A	G	1.561	3.70203e-09	0.264	0.0454	0.1875	0.0344	FALSE	TRUE
TD DN (CD4-CD8-) %T cell	Alzheimer's disease	rs6751481	C	T	C	T	0.1217	2.36499e-06	0.02575	0.0042	0.6083	0.0083	FALSE	TRUE
TD DN (CD4-CD8-) %T cell	Alzheimer's disease	rs6755452	G	T	G	T	0.1903	4.74602e-09	0.03241	-0.0156	0.0987598	0.0094	FALSE	TRUE
TD DN (CD4-CD8-) %T cell	Alzheimer's disease	rs7530076	A	G	A	G	-0.4005	1.74e-06	0.08361	0.0372	0.1262	0.0243	FALSE	TRUE
TD DN (CD4-CD8-) %T cell	Alzheimer's disease	rs76673582	T	C	T	C	-0.2404	3.56303e-06	0.05179	-0.0117	0.4806	0.0166	FALSE	TRUE
TD DN (CD4-CD8-) %T cell	Alzheimer's disease	rs78513507	T	C	T	C	0.3462	7.26307e-06	0.07706	0.0068	0.7568	0.0218	FALSE	TRUE
TD DN (CD4-CD8-) %T cell	Alzheimer's disease	rs78911530	A	G	A	G	-0.7933	4.79999e-06	0.1732	0.0088	0.6975	0.0226	FALSE	TRUE
TD DN (CD4-CD8-) %T cell	Alzheimer's disease	rs9266797	T	C	T	C	0.15	1.575e-06	0.03118	-0.0003	0.9723	0.0094	FALSE	TRUE
TD DN (CD4-CD8-) %T cell	Alzheimer's disease	rs9660907	C	T	C	T	0.2574	7.18903e-07	0.05184	0.0283	0.133	0.0189	FALSE	TRUE
TD DN (CD4-CD8-) AC	Alzheimer's disease	rs10003087	G	T	G	T	0.1291	9.59003e-07	0.0263	0.0088	0.2957	0.0084	FALSE	TRUE
TD DN (CD4-CD8-) AC	Alzheimer's disease	rs10422969	A	G	A	G	0.1742	5.91494e-06	0.03839	0.0049	0.7579	0.0158	FALSE	TRUE
TD DN (CD4-CD8-) AC	Alzheimer's disease	rs114588192	T	C	T	C	0.3812	2.28102e-06	0.08052	0.0073	0.774499	0.0255	FALSE	TRUE
TD DN (CD4-CD8-) AC	Alzheimer's disease	rs117257206	A	G	A	G	0.2618	5.91003e-06	0.05771	0.0065	0.6751	0.0154	FALSE	TRUE
TD DN (CD4-CD8-) AC	Alzheimer's disease	rs142576649	C	T	C	T	0.37	7.51e-06	0.08249	0.0328	0.2124	0.0263	FALSE	TRUE
TD DN (CD4-CD8-) AC	Alzheimer's disease	rs17775026	A	G	A	G	0.1223	2.19498e-06	0.0258	-0.0107	0.2113	0.0086	FALSE	TRUE
TD DN (CD4-CD8-) AC	Alzheimer's disease	rs1891587	T	C	T	C	0.1224	1.539e-06	0.02543	-0.0039	0.635	0.0081	FALSE	TRUE
TD DN (CD4-CD8-) AC	Alzheimer's disease	rs2242597	G	T	G	T	-0.2674	3.111e-06	0.05724	0.0226	0.3627	0.0248	FALSE	TRUE
TD DN (CD4-CD8-) AC	Alzheimer's disease	rs36060603	G	A	G	A	0.1218	1.86698e-06	0.0255	-0.0072	0.3803	0.0082	FALSE	TRUE
TD DN (CD4-CD8-) AC	Alzheimer's disease	rs4497244	A	G	A	G	0.9668	4.492e-06	0.2104	0.0499	0.1033	0.0306	FALSE	TRUE
TD DN (CD4-CD8-) AC	Alzheimer's disease	rs61126090	G	A	G	A	-0.2671	1.30497e-12	0.03751	-0.0182	0.575	0.0324	FALSE	TRUE
TD DN (CD4-CD8-) AC	Alzheimer's disease	rs6431734	A	C	A	C	0.1405	7.92301e-06	0.03141	0.0008	0.9283	0.0089	FALSE	TRUE
TD DN (CD4-CD8-) AC	Alzheimer's disease	rs6751481	C	T	C	T	0.115	6.71599e-06	0.02551	0.0042	0.6083	0.0083	FALSE	TRUE
TD DN (CD4-CD8-) AC	Alzheimer's disease	rs6755452	G	T	G	T	0.1651	2.939e-07	0.03214	-0.0156	0.0987598	0.0094	FALSE	TRUE
TD DN (CD4-CD8-) AC	Alzheimer's disease	rs75865132	C	T	C	T	-1.143	8.77304e-06	0.2566	-0.0142	0.7415	0.0432	FALSE	TRUE
TD DN (CD4-CD8-) AC	Alzheimer's disease	rs7744522	G	A	G	A	0.1133	6.11998e-06	0.02501	0.0072	0.4111	0.0088	FALSE	TRUE
TD DN (CD4-CD8-) AC	Alzheimer's disease	rs78513507	T	C	T	C	0.3442	6.57597e-06	0.07624	0.0068	0.7568	0.0218	FALSE	TRUE
TD DN (CD4-CD8-) AC	Alzheimer's disease	rs9461666	G	T	G	T	-0.2244	5.696e-06	0.04937	-0.0028	0.914	0.0263	FALSE	TRUE
TD DN (CD4-CD8-) AC	Alzheimer's disease	rs9660907	C	T	C	T	0.2323	6.30406e-06	0.05137	0.0283	0.133	0.0189	FALSE	TRUE
CD25 on CD45RA- CD4 not Treg	Alzheimer's disease	rs1000411	T	C	T	C	0.1341	4.96295e-06	0.02931	-0.0233	0.0227201	0.0102	FALSE	TRUE
CD25 on CD45RA- CD4 not Treg	Alzheimer's disease	rs10509573	C	T	C	T	-0.1305	7.71596e-06	0.02914	0.0197	0.0511199	0.0101	FALSE	TRUE
CD25 on CD45RA- CD4 not Treg	Alzheimer's disease	rs116928928	C	T	C	T	-0.3318	4.52304e-07	0.06563	0.0528	0.2332	0.0443	FALSE	TRUE
CD25 on CD45RA- CD4 not Treg	Alzheimer's disease	rs118110714	A	G	A	G	1.117	9.21595e-07	0.2272	0.0194	0.4235	0.0243	FALSE	TRUE
CD25 on CD45RA- CD4 not Treg	Alzheimer's disease	rs139194198	G	A	G	A	0.4981	9.45301e-06	0.1123	0.0279	0.335	0.0289	FALSE	TRUE
CD25 on CD45RA- CD4 not Treg	Alzheimer's disease	rs139210967	G	A	G	A	2.576	5.82895e-06	0.5674	-0.0019	0.954	0.0329	FALSE	TRUE
CD25 on CD45RA- CD4 not Treg	Alzheimer's disease	rs143987752	C	T	C	T	-0.4097	8.45006e-06	0.09185	0.0197	0.6382	0.042	FALSE	TRUE
CD25 on CD45RA- CD4 not Treg	Alzheimer's disease	rs144239147	A	G	A	G	0.5126	6.06694e-06	0.1131	0.0319	0.3158	0.0318	FALSE	TRUE
CD25 on CD45RA- CD4 not Treg	Alzheimer's disease	rs145627854	C	T	C	T	0.8384	5.92598e-06	0.1848	0.0139	0.7624	0.0461	FALSE	TRUE
CD25 on CD45RA- CD4 not Treg	Alzheimer's disease	rs149326960	G	T	G	T	-0.4159	5.52904e-06	0.09138	0.022	0.4374	0.0283	FALSE	TRUE
CD25 on CD45RA- CD4 not Treg	Alzheimer's disease	rs16884012	T	C	T	C	-1.603	3.40997e-06	0.3446	-0.0178	0.642	0.0382	FALSE	TRUE
CD25 on CD45RA- CD4 not Treg	Alzheimer's disease	rs181741769	C	T	C	T	1.229	6.33301e-06	0.2718	-0.0429	0.278	0.0395	FALSE	TRUE
CD25 on CD45RA- CD4 not Treg	Alzheimer's disease	rs35894198	A	G	A	G	0.1808	2.60699e-06	0.0384	-0.0024	0.845	0.0123	FALSE	TRUE
CD25 on CD45RA- CD4 not Treg	Alzheimer's disease	rs4075635	G	A	G	A	-0.1156	6.41505e-06	0.02558	0.0034	0.7153	0.0092	FALSE	TRUE
CD25 on CD45RA- CD4 not Treg	Alzheimer's disease	rs4080481	A	C	A	C	0.1326	5.76196e-07	0.02647	0.0062	0.4909	0.009	FALSE	TRUE
CD25 on CD45RA- CD4 not Treg	Alzheimer's disease	rs4669451	C	T	C	T	0.1396	1.378e-06	0.02887	-0.0004	0.9704	0.0095	FALSE	TRUE
CD25 on CD45RA- CD4 not Treg	Alzheimer's disease	rs61839660	T	C	T	C	0.6113	6.69576e-28	0.05534	-0.0299	0.0384804	0.0144	FALSE	TRUE
CD25 on CD45RA- CD4 not Treg	Alzheimer's disease	rs67403544	A	G	A	G	0.4626	2.474e-06	0.09804	0.0172	0.4047	0.0206	FALSE	TRUE
CD25 on CD45RA- CD4 not Treg	Alzheimer's disease	rs7406899	G	A	G	A	0.195	6.49606e-07	0.03913	0.009	0.674099	0.0214	FALSE	TRUE
CD25 on CD45RA- CD4 not Treg	Alzheimer's disease	rs74553250	T	C	T	C	-0.2023	6.42096e-07	0.04055	0.0098	0.712901	0.0268	FALSE	TRUE
CD25 on CD45RA- CD4 not Treg	Alzheimer's disease	rs79062365	C	T	C	T	0.4552	2.55499e-06	0.09661	-0.0032	0.9052	0.0272	FALSE	TRUE
CD25 on CD45RA- CD4 not Treg	Alzheimer's disease	rs80026829	A	G	A	G	1.015	8.78901e-06	0.2281	0.014	0.563101	0.0242	FALSE	TRUE
CD25 on CD45RA- CD4 not Treg	Alzheimer's disease	rs9480540	G	A	G	A	0.8126	9.71404e-06	0.1834	-0.0193	0.219	0.0157	FALSE	TRUE
HVEM on T cell	Alzheimer's disease	rs10008912	G	A	G	A	0.1962	3.91697e-06	0.04231	-0.0065	0.4711	0.009	FALSE	TRUE
HVEM on T cell	Alzheimer's disease	rs10747856	G	A	G	A	0.1824	5.98398e-06	0.04013	-0.0093	0.2557	0.0082	FALSE	TRUE
HVEM on T cell	Alzheimer's disease	rs11212429	T	C	T	C	-1.345	1.73101e-07	0.256	0.0045	0.9085	0.0388	FALSE	TRUE
HVEM on T cell	Alzheimer's disease	rs114178658	G	A	G	A	0.2853	8.84301e-06	0.06394	0.0062	0.7271	0.0179	FALSE	TRUE
HVEM on T cell	Alzheimer's disease	rs116783256	T	C	T	C	0.295	8.88792e-06	0.06613	-0.0047	0.7796	0.0167	FALSE	TRUE
HVEM on T cell	Alzheimer's disease	rs12284339	A	G	A	G	-1.363	3.30202e-06	0.2918	0.0082	0.739399	0.0247	FALSE	TRUE
HVEM on T cell	Alzheimer's disease	rs12818999	A	G	A	G	0.4837	5.59706e-06	0.106	-0.0046	0.7886	0.0173	FALSE	TRUE
HVEM on T cell	Alzheimer's disease	rs140639767	A	C	A	C	-0.7914	9.66807e-06	0.1781	0.0419	0.3491	0.0448	FALSE	TRUE
HVEM on T cell	Alzheimer's disease	rs1499672	G	A	G	A	-0.194	4.47899e-06	0.04209	0.0056	0.4927	0.0081	FALSE	TRUE
HVEM on T cell	Alzheimer's disease	rs1886730	C	T	C	T	0.2864	7.00164e-13	0.03948	0.0102	0.2159	0.0082	FALSE	TRUE
HVEM on T cell	Alzheimer's disease	rs2246952	G	A	G	A	0.279	1.84701e-06	0.05822	0.0046	0.726599	0.0131	FALSE	TRUE
HVEM on T cell	Alzheimer's disease	rs2731518	A	G	A	G	0.1923	9.23294e-06	0.04318	-0.0015	0.8585	0.0082	FALSE	TRUE
HVEM on T cell	Alzheimer's disease	rs3138035	T	C	T	C	0.2134	1.42298e-06	0.04403	-0.0087	0.3082	0.0085	FALSE	TRUE
HVEM on T cell	Alzheimer's disease	rs313856	C	T	C	T	0.2265	2.35603e-06	0.04776	-0.0165	0.1508	0.0115	FALSE	TRUE
HVEM on T cell	Alzheimer's disease	rs62140870	G	A	G	A	-0.6421	8.81901e-06	0.1439	-0.0791	0.00234698	0.026	FALSE	TRUE
HVEM on T cell	Alzheimer's disease	rs6577804	C	T	C	T	-0.1933	6.1e-06	0.04255	-0.0055	0.4993	0.0082	FALSE	TRUE
HVEM on T cell	Alzheimer's disease	rs73049692	C	T	C	T	-0.3789	7.32099e-06	0.08413	-0.003	0.8869	0.0211	FALSE	TRUE
HVEM on T cell	Alzheimer's disease	rs73227426	T	C	T	C	0.9814	8.56505e-06	0.2196	0.0215	0.2016	0.0169	FALSE	TRUE
HVEM on T cell	Alzheimer's disease	rs73449242	T	C	T	C	0.2877	4.45102e-06	0.06242	-0.002	0.8996	0.016	FALSE	TRUE
HVEM on T cell	Alzheimer's disease	rs7731342	T	C	T	C	0.3429	7.58106e-06	0.07627	0.0178	0.1708	0.013	FALSE	TRUE
HVEM on T cell	Alzheimer's disease	rs7738988	A	C	A	C	0.2264	1.736e-06	0.04713	-0.0092	0.3201	0.0093	FALSE	TRUE
HVEM on T cell	Alzheimer's disease	rs78389375	T	C	T	C	-0.5153	2.249e-06	0.1084	0.0225	0.5385	0.0365	FALSE	TRUE
HVEM on T cell	Alzheimer's disease	rs79388518	C	T	C	T	-0.5518	3.80198e-06	0.1189	-0.0402	0.2561	0.0354	FALSE	TRUE
HVEM on T cell	Alzheimer's disease	rs9870329	T	C	T	C	0.4262	7.61693e-06	0.09482	0.0303	0.1478	0.0209	FALSE	TRUE
CX3CR1 on CD14+ CD16+ monocyte	Alzheimer's disease	rs10011142	T	C	T	C	-0.1374	9.36807e-06	0.03097	-0.0343	0.00474799	0.0121	FALSE	TRUE
CX3CR1 on CD14+ CD16+ monocyte	Alzheimer's disease	rs10499824	T	C	T	C	0.439	6.22601e-06	0.09702	-0.0148	0.731799	0.0433	FALSE	TRUE
CX3CR1 on CD14+ CD16+ monocyte	Alzheimer's disease	rs112450242	T	C	T	C	-1.107	4.09204e-06	0.2399	0.0009	0.9587	0.0183	FALSE	TRUE
CX3CR1 on CD14+ CD16+ monocyte	Alzheimer's disease	rs117043578	T	C	T	C	2.527	9.91311e-06	0.5709	0.0243	0.5309	0.0388	FALSE	TRUE
CX3CR1 on CD14+ CD16+ monocyte	Alzheimer's disease	rs11768517	T	G	T	G	0.1326	8.74903e-07	0.02691	-0.002	0.8217	0.0087	FALSE	TRUE
CX3CR1 on CD14+ CD16+ monocyte	Alzheimer's disease	rs117871360	G	A	G	A	-0.7288	8.47305e-06	0.1634	0.0178	0.4284	0.0224	FALSE	TRUE
CX3CR1 on CD14+ CD16+ monocyte	Alzheimer's disease	rs117896307	C	T	C	T	-0.257	8.35603e-06	0.0576	-0.0098	0.6191	0.0197	FALSE	TRUE
CX3CR1 on CD14+ CD16+ monocyte	Alzheimer's disease	rs117940302	A	G	A	G	0.4039	2.28402e-06	0.08531	0.0052	0.85	0.0275	FALSE	TRUE
CX3CR1 on CD14+ CD16+ monocyte	Alzheimer's disease	rs1376624	C	T	C	T	0.1412	3.90499e-06	0.03053	-0.0067	0.4644	0.0091	FALSE	TRUE
CX3CR1 on CD14+ CD16+ monocyte	Alzheimer's disease	rs139952138	T	G	T	G	-0.3522	5.55303e-06	0.0774	0.0104	0.8465	0.0539	FALSE	TRUE
CX3CR1 on CD14+ CD16+ monocyte	Alzheimer's disease	rs148057702	T	C	T	C	-0.3442	4.01301e-06	0.07454	0.0583	0.02083	0.0252	FALSE	TRUE
CX3CR1 on CD14+ CD16+ monocyte	Alzheimer's disease	rs149100	G	T	G	T	-0.1347	8.48594e-08	0.0251	0.0006	0.948	0.0085	FALSE	TRUE
CX3CR1 on CD14+ CD16+ monocyte	Alzheimer's disease	rs16843658	T	C	T	C	-0.3609	1.014e-06	0.07369	-0.0202	0.4509	0.0267	FALSE	TRUE
CX3CR1 on CD14+ CD16+ monocyte	Alzheimer's disease	rs16867973	G	A	G	A	0.1506	8.30195e-06	0.03374	-0.0097	0.3945	0.0113	FALSE	TRUE
CX3CR1 on CD14+ CD16+ monocyte	Alzheimer's disease	rs17095454	C	T	C	T	-1.15	3.15101e-07	0.2244	0.0092	0.8204	0.0405	FALSE	TRUE
CX3CR1 on CD14+ CD16+ monocyte	Alzheimer's disease	rs17549676	A	G	A	G	-0.1916	7.84495e-06	0.04281	0.036	0.012	0.0143	FALSE	TRUE
CX3CR1 on CD14+ CD16+ monocyte	Alzheimer's disease	rs1801274	G	A	G	A	-0.4628	2.61517e-69	0.02573	0.0103	0.2032	0.0081	FALSE	TRUE
CX3CR1 on CD14+ CD16+ monocyte	Alzheimer's disease	rs2649752	A	C	A	C	0.1581	3.51099e-08	0.02862	-0.0129	0.1363	0.0087	FALSE	TRUE
CX3CR1 on CD14+ CD16+ monocyte	Alzheimer's disease	rs28491136	T	C	T	C	-0.1603	7.17893e-06	0.03567	0.019	0.0595594	0.0101	FALSE	TRUE
CX3CR1 on CD14+ CD16+ monocyte	Alzheimer's disease	rs372655475	T	G	T	G	-0.2806	9.18502e-06	0.06317	-0.0117	0.5319	0.0186	FALSE	TRUE
CX3CR1 on CD14+ CD16+ monocyte	Alzheimer's disease	rs4957969	G	A	G	A	-0.2538	2.09899e-06	0.05341	-0.0295	0.0528494	0.0152	FALSE	TRUE
CX3CR1 on CD14+ CD16+ monocyte	Alzheimer's disease	rs58215329	T	C	T	C	0.1816	3.43598e-06	0.03906	0.0054	0.7271	0.0154	FALSE	TRUE
CX3CR1 on CD14+ CD16+ monocyte	Alzheimer's disease	rs59871438	C	T	C	T	-0.962	6.14299e-06	0.2124	-0.0605	0.1458	0.0416	FALSE	TRUE
CX3CR1 on CD14+ CD16+ monocyte	Alzheimer's disease	rs62170788	T	C	T	C	-0.2816	4.92595e-06	0.06155	0.0181	0.2083	0.0144	FALSE	TRUE
CX3CR1 on CD14+ CD16+ monocyte	Alzheimer's disease	rs6952061	T	C	T	C	0.2141	8.17805e-06	0.04792	-0.0234	0.1988	0.0182	FALSE	TRUE
CX3CR1 on CD14+ CD16+ monocyte	Alzheimer's disease	rs72918158	A	G	A	G	-1.499	1.33101e-06	0.3095	-0.0076	0.8818	0.0512	FALSE	TRUE
CX3CR1 on CD14+ CD16+ monocyte	Alzheimer's disease	rs74574092	C	T	C	T	0.2025	2.68398e-06	0.04307	0.0022	0.8857	0.0154	FALSE	TRUE
CX3CR1 on CD14+ CD16+ monocyte	Alzheimer's disease	rs7791415	T	C	T	C	-0.4614	1.68601e-06	0.0962	0.0288	0.1624	0.0206	FALSE	TRUE
CX3CR1 on CD14+ CD16+ monocyte	Alzheimer's disease	rs894107	C	T	C	T	0.1991	3.41397e-07	0.03898	0.0166	0.1085	0.0104	FALSE	TRUE
CX3CR1 on CD14+ CD16+ monocyte	Alzheimer's disease	rs9542786	C	A	C	A	-0.2675	2.93603e-06	0.05713	-0.0099	0.52	0.0155	FALSE	TRUE
CD33dim HLA DR+ CD11b+ AC	Alzheimer's disease	rs10011663	G	A	G	A	0.1837	1.29799e-06	0.03783	-0.0007	0.9309	0.0086	FALSE	TRUE
CD33dim HLA DR+ CD11b+ AC	Alzheimer's disease	rs10025005	T	G	T	G	0.1934	5.85706e-07	0.03857	0.0112	0.3134	0.0111	FALSE	TRUE
CD33dim HLA DR+ CD11b+ AC	Alzheimer's disease	rs11631677	T	C	T	C	-0.1627	8.79205e-07	0.03297	0.0044	0.6107	0.0087	FALSE	TRUE
CD33dim HLA DR+ CD11b+ AC	Alzheimer's disease	rs11709025	T	C	T	C	0.1544	8.7791e-06	0.03464	0.0073	0.4311	0.0092	FALSE	TRUE
CD33dim HLA DR+ CD11b+ AC	Alzheimer's disease	rs1201940	C	T	C	T	-0.1483	5.33003e-06	0.03248	-0.0075	0.3556	0.0081	FALSE	TRUE
CD33dim HLA DR+ CD11b+ AC	Alzheimer's disease	rs141080550	A	G	A	G	0.4746	3.40997e-07	0.09273	0.0437	0.0984102	0.0265	FALSE	TRUE
CD33dim HLA DR+ CD11b+ AC	Alzheimer's disease	rs143383466	T	C	T	C	1.142	3.90499e-06	0.2466	0.0602	0.0187098	0.0256	FALSE	TRUE
CD33dim HLA DR+ CD11b+ AC	Alzheimer's disease	rs144894656	C	A	C	A	-0.7728	3.77998e-06	0.1667	0.0186	0.5605	0.032	FALSE	TRUE
CD33dim HLA DR+ CD11b+ AC	Alzheimer's disease	rs145231100	A	G	A	G	-0.6579	1.28399e-06	0.1354	-0.0143	0.693201	0.0362	FALSE	TRUE
CD33dim HLA DR+ CD11b+ AC	Alzheimer's disease	rs148937000	T	G	T	G	1.666	9.65695e-06	0.3755	-0.0587	0.1651	0.0423	FALSE	TRUE
CD33dim HLA DR+ CD11b+ AC	Alzheimer's disease	rs17721845	T	C	T	C	0.1862	7.67892e-07	0.03754	-0.0015	0.8749	0.0094	FALSE	TRUE
CD33dim HLA DR+ CD11b+ AC	Alzheimer's disease	rs1801274	G	A	G	A	0.2617	8.34065e-14	0.03479	0.0103	0.2032	0.0081	FALSE	TRUE
CD33dim HLA DR+ CD11b+ AC	Alzheimer's disease	rs192715019	T	C	T	C	-0.5266	1.36301e-07	0.09953	-0.0187	0.68	0.0453	FALSE	TRUE
CD33dim HLA DR+ CD11b+ AC	Alzheimer's disease	rs2868992	G	T	G	T	-0.205	7.14299e-06	0.04553	-0.0007	0.9381	0.0096	FALSE	TRUE
CD33dim HLA DR+ CD11b+ AC	Alzheimer's disease	rs4606283	T	C	T	C	0.1686	4.71205e-06	0.03672	-0.0098	0.2658	0.0088	FALSE	TRUE
CD33dim HLA DR+ CD11b+ AC	Alzheimer's disease	rs58051708	G	A	G	A	-0.721	6.12393e-06	0.159	-0.0708	0.0842597	0.041	FALSE	TRUE
CD33dim HLA DR+ CD11b+ AC	Alzheimer's disease	rs62146115	G	A	G	A	-0.2861	5.16297e-06	0.06259	-0.0039	0.8536	0.0213	FALSE	TRUE
CD33dim HLA DR+ CD11b+ AC	Alzheimer's disease	rs62362950	T	C	T	C	-0.3383	6.87005e-07	0.0679	0.0094	0.5183	0.0145	FALSE	TRUE
CD33dim HLA DR+ CD11b+ AC	Alzheimer's disease	rs71596080	C	T	C	T	0.2853	1.12001e-06	0.0584	-0.0227	0.1412	0.0155	FALSE	TRUE
CD33dim HLA DR+ CD11b+ AC	Alzheimer's disease	rs74638799	G	A	G	A	0.2768	3.81303e-06	0.05971	-0.0075	0.6248	0.0153	FALSE	TRUE
CD33dim HLA DR+ CD11b+ AC	Alzheimer's disease	rs74851637	T	G	T	G	0.8135	2.60597e-06	0.1725	0.0021	0.9292	0.0237	FALSE	TRUE
CD33dim HLA DR+ CD11b+ AC	Alzheimer's disease	rs76640602	A	G	A	G	0.5875	3.94503e-07	0.1154	0.0265	0.4129	0.0323	FALSE	TRUE
CD33dim HLA DR+ CD11b+ AC	Alzheimer's disease	rs9510371	T	C	T	C	0.2146	2.133e-06	0.04513	0.0041	0.6666	0.0096	FALSE	TRUE
CD33dim HLA DR+ CD11b+ AC	Alzheimer's disease	rs9524403	C	T	C	T	1.043	2.65601e-06	0.2214	0.0375	0.1769	0.0277	FALSE	TRUE
CD45RA- CD4+ %T cell	Alzheimer's disease	rs10013442	A	G	A	G	0.1825	8.05805e-06	0.04082	-0.0087	0.566301	0.0152	FALSE	TRUE
CD45RA- CD4+ %T cell	Alzheimer's disease	rs11201613	A	G	A	G	-0.4646	4.11604e-06	0.1007	-0.0069	0.792399	0.0261	FALSE	TRUE
CD45RA- CD4+ %T cell	Alzheimer's disease	rs11579717	A	G	A	G	-0.9339	1.793e-07	0.1786	0.0488	0.0161102	0.0203	FALSE	TRUE
CD45RA- CD4+ %T cell	Alzheimer's disease	rs12160006	C	T	C	T	-0.1697	7.31493e-06	0.03778	0.0007	0.9666	0.017	FALSE	TRUE
CD45RA- CD4+ %T cell	Alzheimer's disease	rs12448994	T	C	T	C	0.1905	3.27597e-06	0.04089	0.0028	0.7949	0.0107	FALSE	TRUE
CD45RA- CD4+ %T cell	Alzheimer's disease	rs12498745	A	G	A	G	-2.198	5.72506e-07	0.4387	0.012	0.7901	0.045	FALSE	TRUE
CD45RA- CD4+ %T cell	Alzheimer's disease	rs12712610	G	A	G	A	-0.1632	7.82492e-10	0.02646	0.0079	0.4662	0.0108	FALSE	TRUE
CD45RA- CD4+ %T cell	Alzheimer's disease	rs1380699	G	A	G	A	-0.1468	1.89701e-06	0.03075	0.0182	0.1145	0.0115	FALSE	TRUE
CD45RA- CD4+ %T cell	Alzheimer's disease	rs138143706	A	G	A	G	-0.3731	8.03397e-06	0.08345	0.0546	0.1166	0.0348	FALSE	TRUE
CD45RA- CD4+ %T cell	Alzheimer's disease	rs142403852	C	T	C	T	-0.6934	1.366e-06	0.1433	-0.0283	0.3735	0.0318	FALSE	TRUE
CD45RA- CD4+ %T cell	Alzheimer's disease	rs144196931	A	G	A	G	-0.3683	4.454e-06	0.08013	0.0307	0.1614	0.0219	FALSE	TRUE
CD45RA- CD4+ %T cell	Alzheimer's disease	rs146620586	T	G	T	G	-1.991	1.77992e-13	0.2693	0.0625	0.1001	0.038	FALSE	TRUE
CD45RA- CD4+ %T cell	Alzheimer's disease	rs1550856	G	A	G	A	0.1562	8.58796e-08	0.02912	0.0092	0.4862	0.0133	FALSE	TRUE
CD45RA- CD4+ %T cell	Alzheimer's disease	rs1581998	G	T	G	T	-0.13	5.659e-07	0.02593	0.001	0.9115	0.0092	FALSE	TRUE
CD45RA- CD4+ %T cell	Alzheimer's disease	rs1626874	A	G	A	G	0.1388	1.639e-06	0.0289	-0.0041	0.6577	0.0093	FALSE	TRUE
CD45RA- CD4+ %T cell	Alzheimer's disease	rs188628982	T	G	T	G	0.3353	9.15503e-06	0.07547	0.0153	0.621001	0.0309	FALSE	TRUE
CD45RA- CD4+ %T cell	Alzheimer's disease	rs190665193	G	A	G	A	-3.149	1.30299e-06	0.6495	-0.0677	0.2276	0.0561	FALSE	TRUE
CD45RA- CD4+ %T cell	Alzheimer's disease	rs543009646	T	C	T	C	-0.3734	9.51393e-06	0.08419	0.0788	0.0305703	0.0364	FALSE	TRUE
CD45RA- CD4+ %T cell	Alzheimer's disease	rs62539662	C	A	C	A	0.4998	5.00495e-06	0.1093	0.0382	0.0747997	0.0214	FALSE	TRUE
CD45RA- CD4+ %T cell	Alzheimer's disease	rs72795179	A	G	A	G	0.1112	5.39299e-06	0.02442	-0.0096	0.2412	0.0082	FALSE	TRUE
CD45RA- CD4+ %T cell	Alzheimer's disease	rs73196629	G	A	G	A	-0.6057	1.31801e-06	0.125	0.015	0.4457	0.0197	FALSE	TRUE
CD45RA- CD4+ %T cell	Alzheimer's disease	rs74911099	C	T	C	T	-0.7845	3.41397e-06	0.1687	0.0029	0.905	0.0247	FALSE	TRUE
CD45RA- CD4+ %T cell	Alzheimer's disease	rs7675607	G	T	G	T	-0.1152	4.35702e-06	0.02503	0.0031	0.7079	0.0083	FALSE	TRUE
CD45RA- CD4+ %T cell	Alzheimer's disease	rs79647440	T	C	T	C	-4.107	1.01801e-07	0.7699	-0.091	0.0369598	0.0436	FALSE	TRUE
CD45RA- CD4+ %T cell	Alzheimer's disease	rs9271766	G	A	G	A	-0.1842	9.54289e-08	0.03445	-0.0202	0.0585302	0.0107	FALSE	TRUE
CD45RA- CD4+ %CD4+	Alzheimer's disease	rs10013469	A	G	A	G	0.192	1.894e-06	0.04023	-0.0108	0.4765	0.0151	FALSE	TRUE
CD45RA- CD4+ %CD4+	Alzheimer's disease	rs10230422	A	G	A	G	0.1892	6.61302e-06	0.04192	-0.0143	0.3327	0.0147	FALSE	TRUE
CD45RA- CD4+ %CD4+	Alzheimer's disease	rs10269315	T	C	T	C	0.6089	5.37205e-06	0.1336	-0.0272	0.3337	0.0282	FALSE	TRUE
CD45RA- CD4+ %CD4+	Alzheimer's disease	rs10432663	C	T	C	T	-0.1402	3.14398e-06	0.03003	-0.0103	0.305	0.0101	FALSE	TRUE
CD45RA- CD4+ %CD4+	Alzheimer's disease	rs11124653	A	C	A	C	0.1345	3.92202e-08	0.02443	0.0066	0.4258	0.0083	FALSE	TRUE
CD45RA- CD4+ %CD4+	Alzheimer's disease	rs11579717	A	G	A	G	-1.081	8.86993e-10	0.1759	0.0488	0.0161102	0.0203	FALSE	TRUE
CD45RA- CD4+ %CD4+	Alzheimer's disease	rs116794175	C	T	C	T	-0.8093	9.4241e-06	0.1824	0.041	0.573099	0.0728	FALSE	TRUE
CD45RA- CD4+ %CD4+	Alzheimer's disease	rs12121018	A	G	A	G	-0.1566	5.99805e-07	0.03132	-0.0256	0.0873293	0.015	FALSE	TRUE
CD45RA- CD4+ %CD4+	Alzheimer's disease	rs1250600	G	T	G	T	-0.1145	7.58106e-06	0.02553	-0.0021	0.8047	0.0084	FALSE	TRUE
CD45RA- CD4+ %CD4+	Alzheimer's disease	rs12712610	G	A	G	A	-0.1902	3.13112e-13	0.02599	0.0079	0.4662	0.0108	FALSE	TRUE
CD45RA- CD4+ %CD4+	Alzheimer's disease	rs146329634	T	C	T	C	0.3128	1.82201e-06	0.06543	0.0789	0.0104901	0.0308	FALSE	TRUE
CD45RA- CD4+ %CD4+	Alzheimer's disease	rs146620586	T	G	T	G	-2.021	3.4578e-14	0.2655	0.0625	0.1001	0.038	FALSE	TRUE
CD45RA- CD4+ %CD4+	Alzheimer's disease	rs146674398	T	C	T	C	-0.4158	9.44104e-06	0.09372	-0.0004	0.9865	0.0262	FALSE	TRUE
CD45RA- CD4+ %CD4+	Alzheimer's disease	rs183293285	T	C	T	C	-0.425	3.81303e-06	0.09182	0.0666	0.0221799	0.0291	FALSE	TRUE
CD45RA- CD4+ %CD4+	Alzheimer's disease	rs1849779	T	C	T	C	-0.1119	5.04104e-06	0.02448	0.0132	0.1227	0.0085	FALSE	TRUE
CD45RA- CD4+ %CD4+	Alzheimer's disease	rs2252009	G	T	G	T	0.1373	7.22005e-06	0.03055	-0.0064	0.5253	0.01	FALSE	TRUE
CD45RA- CD4+ %CD4+	Alzheimer's disease	rs62341785	G	A	G	A	0.1329	5.94306e-06	0.02929	0.0042	0.705601	0.0112	FALSE	TRUE
CD45RA- CD4+ %CD4+	Alzheimer's disease	rs71569312	T	C	T	C	0.4277	3.34603e-06	0.09186	-0.0341	0.2444	0.0293	FALSE	TRUE
CD45RA- CD4+ %CD4+	Alzheimer's disease	rs7216330	T	C	T	C	-0.1152	1.77101e-06	0.02407	0.0081	0.3288	0.0083	FALSE	TRUE
CD45RA- CD4+ %CD4+	Alzheimer's disease	rs72613709	G	T	G	T	0.2888	3.93804e-06	0.06249	-0.0254	0.1087	0.0158	FALSE	TRUE
CD45RA- CD4+ %CD4+	Alzheimer's disease	rs73189225	A	G	A	G	-0.1661	8.12101e-06	0.03716	0.0008	0.9362	0.0094	FALSE	TRUE
CD45RA- CD4+ %CD4+	Alzheimer's disease	rs7700617	A	C	A	C	-0.1075	6.86705e-06	0.02387	-0.0045	0.5844	0.0082	FALSE	TRUE
CD45RA- CD4+ %CD4+	Alzheimer's disease	rs9271766	G	A	G	A	-0.1619	1.509e-06	0.03361	-0.0202	0.0585302	0.0107	FALSE	TRUE
CD45RA- CD4+ %CD4+	Alzheimer's disease	rs931555	T	C	T	C	-0.1246	9.25209e-06	0.02807	0.0132	0.1304	0.0087	FALSE	TRUE
Memory B cell AC	Alzheimer's disease	rs10018308	G	A	G	A	0.1198	8.09003e-06	0.0268	-0.0014	0.8689	0.0086	FALSE	TRUE
Memory B cell AC	Alzheimer's disease	rs11653761	T	G	T	G	-0.1161	2.93799e-06	0.02478	-0.0365	2.98298e-05	0.0087	FALSE	TRUE
Memory B cell AC	Alzheimer's disease	rs12216018	T	C	T	C	-0.1641	5.39399e-06	0.03601	-0.0195	0.0841608	0.0113	FALSE	TRUE
Memory B cell AC	Alzheimer's disease	rs12763172	C	T	C	T	0.1259	6.26801e-06	0.02783	0.0135	0.1086	0.0084	FALSE	TRUE
Memory B cell AC	Alzheimer's disease	rs12874404	G	A	G	A	0.173	9.13903e-11	0.02661	-0.0343	0.0471802	0.0173	FALSE	TRUE
Memory B cell AC	Alzheimer's disease	rs144295598	A	G	A	G	0.6102	4.46303e-07	0.1207	-0.0247	0.6422	0.0531	FALSE	TRUE
Memory B cell AC	Alzheimer's disease	rs16867231	A	G	A	G	0.538	3.44897e-06	0.1157	-0.0116	0.597601	0.022	FALSE	TRUE
Memory B cell AC	Alzheimer's disease	rs17708396	A	C	A	C	2.504	1.67699e-06	0.522	0.0034	0.925	0.0362	FALSE	TRUE
Memory B cell AC	Alzheimer's disease	rs2879633	A	G	A	G	-0.1301	2.84302e-06	0.02775	0.0001	0.9934	0.0094	FALSE	TRUE
Memory B cell AC	Alzheimer's disease	rs36072728	T	C	T	C	0.305	5.80805e-06	0.06718	0.0002	0.9882	0.0151	FALSE	TRUE
Memory B cell AC	Alzheimer's disease	rs557577736	G	A	G	A	1.829	2.68701e-06	0.3891	-0.0691	0.1182	0.0443	FALSE	TRUE
Memory B cell AC	Alzheimer's disease	rs74565175	A	G	A	G	0.1371	7.27394e-06	0.03052	0.0115	0.3263	0.0118	FALSE	TRUE
Memory B cell AC	Alzheimer's disease	rs77643931	G	T	G	T	0.1235	8.97408e-06	0.02777	-0.0155	0.1624	0.0111	FALSE	TRUE
Memory B cell AC	Alzheimer's disease	rs9614226	G	T	G	T	-0.4235	1.22101e-06	0.08713	0.005	0.806	0.0202	FALSE	TRUE
CD45RA on naive CD4+	Alzheimer's disease	rs113885925	T	C	T	C	0.4252	6.15503e-06	0.09388	-0.0445	0.1118	0.028	FALSE	TRUE
CD45RA on naive CD4+	Alzheimer's disease	rs115645435	C	T	C	T	0.4693	6.92006e-06	0.1042	-0.0163	0.6284	0.0336	FALSE	TRUE
CD45RA on naive CD4+	Alzheimer's disease	rs117626397	G	A	G	A	2.551	5.36105e-06	0.5596	0.0117	0.7375	0.035	FALSE	TRUE
CD45RA on naive CD4+	Alzheimer's disease	rs12730924	G	A	G	A	0.1271	9.44909e-06	0.02865	0.0057	0.524901	0.009	FALSE	TRUE
CD45RA on naive CD4+	Alzheimer's disease	rs138283413	T	C	T	C	0.3299	2.32001e-06	0.0697	-0.0042	0.8687	0.0253	FALSE	TRUE
CD45RA on naive CD4+	Alzheimer's disease	rs138915779	A	C	A	C	1.33	6.18899e-09	0.2281	0.0334	0.2641	0.0299	FALSE	TRUE
CD45RA on naive CD4+	Alzheimer's disease	rs139544135	T	C	T	C	0.3938	6.45595e-06	0.08713	-0.0002	0.9947	0.0343	FALSE	TRUE
CD45RA on naive CD4+	Alzheimer's disease	rs145947216	T	C	T	C	0.7147	9.977e-24	0.07055	-0.0165	0.5734	0.0293	FALSE	TRUE
CD45RA on naive CD4+	Alzheimer's disease	rs146899923	C	T	C	T	0.6632	2.70203e-06	0.1411	0.0481	0.1254	0.0314	FALSE	TRUE
CD45RA on naive CD4+	Alzheimer's disease	rs147071297	A	G	A	G	1.525	9.25124e-13	0.2126	0.0643	0.0349502	0.0305	FALSE	TRUE
CD45RA on naive CD4+	Alzheimer's disease	rs147692482	T	C	T	C	0.6089	6.3183e-13	0.08426	-0.0036	0.9281	0.04	FALSE	TRUE
CD45RA on naive CD4+	Alzheimer's disease	rs1641548	T	C	T	C	0.176	1.04501e-06	0.03597	0.0146	0.1662	0.0106	FALSE	TRUE
CD45RA on naive CD4+	Alzheimer's disease	rs17583875	A	G	A	G	2.212	2.83074e-21	0.2318	0.0141	0.6304	0.0293	FALSE	TRUE
CD45RA on naive CD4+	Alzheimer's disease	rs187089343	C	A	C	A	1.023	7.12492e-07	0.206	-0.006	0.9293	0.0676	FALSE	TRUE
CD45RA on naive CD4+	Alzheimer's disease	rs28590272	G	A	G	A	0.1304	9.35901e-06	0.02937	0.0214	0.0163399	0.0089	FALSE	TRUE
CD45RA on naive CD4+	Alzheimer's disease	rs34558770	T	C	T	C	0.4963	5.75043e-51	0.03241	0.0196	0.1979	0.0152	FALSE	TRUE
CD45RA on naive CD4+	Alzheimer's disease	rs35550194	A	G	A	G	0.3391	6.00095e-07	0.06779	-0.0353	0.0607701	0.0188	FALSE	TRUE
CD45RA on naive CD4+	Alzheimer's disease	rs531042	T	G	T	G	-0.1404	6.65396e-06	0.03111	-0.0109	0.2817	0.0102	FALSE	TRUE
CD45RA on naive CD4+	Alzheimer's disease	rs61913600	G	A	G	A	0.1272	4.917e-06	0.0278	-0.0103	0.2439	0.0088	FALSE	TRUE
CD45RA on naive CD4+	Alzheimer's disease	rs61938012	A	G	A	G	-0.1286	9.22104e-06	0.02895	0.0013	0.8871	0.0095	FALSE	TRUE
CD45RA on naive CD4+	Alzheimer's disease	rs62328019	T	C	T	C	0.2505	9.15293e-06	0.05636	0.0026	0.8638	0.0152	FALSE	TRUE
CD45RA on naive CD4+	Alzheimer's disease	rs72859264	A	G	A	G	-0.4805	8.93305e-06	0.108	-0.0413	0.0937994	0.0246	FALSE	TRUE
CD45RA on naive CD4+	Alzheimer's disease	rs74967706	C	T	C	T	0.7222	8.94602e-08	0.1347	-0.0037	0.8798	0.0248	FALSE	TRUE
CD45RA on naive CD4+	Alzheimer's disease	rs75425544	T	C	T	C	-0.4207	6.58506e-06	0.09318	0.009	0.7579	0.0292	FALSE	TRUE
CD45RA on naive CD4+	Alzheimer's disease	rs7605193	G	T	G	T	-0.3245	1.19001e-09	0.05318	-0.0089	0.6215	0.0181	FALSE	TRUE
CD45RA on naive CD4+	Alzheimer's disease	rs79000121	G	A	G	A	-0.3227	5.96499e-07	0.0645	-0.0162	0.3657	0.0179	FALSE	TRUE
CD45RA on naive CD4+	Alzheimer's disease	rs79505210	T	C	T	C	0.4859	3.13199e-07	0.09477	-0.0223	0.4833	0.0319	FALSE	TRUE
CD45RA on naive CD4+	Alzheimer's disease	rs79747818	T	C	T	C	0.3184	1.59302e-09	0.0526	0.03	0.3119	0.0297	FALSE	TRUE
CD45RA on naive CD4+	Alzheimer's disease	rs917116	G	T	G	T	0.1762	4.25598e-09	0.0299	-0.0507	2.43103e-07	0.0098	FALSE	TRUE
CD45RA on naive CD4+	Alzheimer's disease	rs9834739	C	T	C	T	-0.3956	7.02393e-06	0.08788	-0.0466	0.0894994	0.0274	FALSE	TRUE
CD33 on Im MDSC	Alzheimer's disease	rs10022829	A	G	A	G	-0.1696	7.42198e-06	0.03773	0.0095	0.3746	0.0108	FALSE	TRUE
CD33 on Im MDSC	Alzheimer's disease	rs10040068	T	C	T	C	0.1917	7.50395e-06	0.04266	-0.0101	0.269	0.0091	FALSE	TRUE
CD33 on Im MDSC	Alzheimer's disease	rs111695695	A	C	A	C	-0.5128	1.05609e-13	0.06836	-0.0119	0.7002	0.0308	FALSE	TRUE
CD33 on Im MDSC	Alzheimer's disease	rs117140964	T	C	T	C	0.418	2.524e-06	0.08848	-0.0074	0.7583	0.024	FALSE	TRUE
CD33 on Im MDSC	Alzheimer's disease	rs11765781	A	G	A	G	0.1816	4.97496e-06	0.03963	0.0049	0.6029	0.0094	FALSE	TRUE
CD33 on Im MDSC	Alzheimer's disease	rs117893093	T	G	T	G	0.4385	3.06302e-06	0.09362	0.039	0.0369598	0.0187	FALSE	TRUE
CD33 on Im MDSC	Alzheimer's disease	rs1218959	A	C	A	C	0.169	9.6221e-06	0.03806	0.0055	0.514	0.0084	FALSE	TRUE
CD33 on Im MDSC	Alzheimer's disease	rs1397071	A	G	A	G	-0.5361	3.17103e-06	0.1146	0.0203	0.3718	0.0227	FALSE	TRUE
CD33 on Im MDSC	Alzheimer's disease	rs141122591	C	T	C	T	0.5083	4.39997e-07	0.1002	-0.0578	0.4693	0.0799	FALSE	TRUE
CD33 on Im MDSC	Alzheimer's disease	rs1421461	C	T	C	T	0.2027	8.687e-06	0.04543	-0.009	0.371	0.0101	FALSE	TRUE
CD33 on Im MDSC	Alzheimer's disease	rs1922127	T	C	T	C	-0.3769	8.127e-06	0.08418	-0.0142	0.2132	0.0114	FALSE	TRUE
CD33 on Im MDSC	Alzheimer's disease	rs4567661	C	A	C	A	-0.1856	3.24101e-06	0.03972	-0.0067	0.4365	0.0086	FALSE	TRUE
CD33 on Im MDSC	Alzheimer's disease	rs56043070	A	G	A	G	0.4156	1.52398e-07	0.0788	0.0011	0.9464	0.0162	FALSE	TRUE
CD33 on Im MDSC	Alzheimer's disease	rs7245846	A	G	A	G	-1.115	6.08135e-143	0.0393	-0.0284	0.00207501	0.0092	FALSE	TRUE
CD33 on Im MDSC	Alzheimer's disease	rs7351079	G	A	G	A	-0.3351	5.06641e-15	0.0424	-0.0064	0.6025	0.0122	FALSE	TRUE
CD33 on Im MDSC	Alzheimer's disease	rs75773078	A	G	A	G	-0.5252	1.63795e-13	0.07057	0.0069	0.682299	0.017	FALSE	TRUE
CD33 on Im MDSC	Alzheimer's disease	rs77635331	T	C	T	C	-0.2765	6.59295e-06	0.06116	-0.0208	0.3546	0.0225	FALSE	TRUE
CD33 on Im MDSC	Alzheimer's disease	rs79377141	A	G	A	G	0.3376	3.07326e-13	0.0459	-0.0082	0.615399	0.0163	FALSE	TRUE
CD33 on Im MDSC	Alzheimer's disease	rs79965644	G	T	G	T	0.4811	6.09902e-06	0.106	-0.0155	0.4071	0.0187	FALSE	TRUE
CD33 on Mo MDSC	Alzheimer's disease	rs10022829	A	G	A	G	-0.1723	5.59397e-06	0.0378	0.0095	0.3746	0.0108	FALSE	TRUE
CD33 on Mo MDSC	Alzheimer's disease	rs10164761	T	C	T	C	0.1855	1.80901e-06	0.0387	0.0068	0.4795	0.0096	FALSE	TRUE
CD33 on Mo MDSC	Alzheimer's disease	rs10861528	A	C	A	C	0.1809	8.23398e-06	0.04043	-0.0105	0.3123	0.0104	FALSE	TRUE
CD33 on Mo MDSC	Alzheimer's disease	rs117150385	A	G	A	G	-0.887	8.66603e-06	0.1988	0.0139	0.7145	0.0379	FALSE	TRUE
CD33 on Mo MDSC	Alzheimer's disease	rs138138479	T	G	T	G	0.7945	6.28304e-06	0.1753	-0.046	0.142	0.0313	FALSE	TRUE
CD33 on Mo MDSC	Alzheimer's disease	rs2362605	A	G	A	G	-0.2041	5.33495e-06	0.04469	0.0014	0.8682	0.0087	FALSE	TRUE
CD33 on Mo MDSC	Alzheimer's disease	rs3865444	A	C	A	C	-1.151	1.71396e-153	0.03884	-0.0337	0.000309999	0.0093	FALSE	TRUE
CD33 on Mo MDSC	Alzheimer's disease	rs403286	A	G	A	G	0.178	2.76401e-06	0.03783	0.0015	0.8495	0.0081	FALSE	TRUE
CD33 on Mo MDSC	Alzheimer's disease	rs4747079	A	G	A	G	0.377	9.26894e-06	0.08474	0.0057	0.757501	0.0186	FALSE	TRUE
CD33 on Mo MDSC	Alzheimer's disease	rs62114147	T	C	T	C	0.2625	2.56271e-12	0.03721	0.0007	0.9424	0.0092	FALSE	TRUE
CD33 on Mo MDSC	Alzheimer's disease	rs6828373	C	T	C	T	0.2291	9.37389e-07	0.04653	0.0004	0.97	0.0111	FALSE	TRUE
CD33 on Mo MDSC	Alzheimer's disease	rs6879785	G	A	G	A	0.1882	6.27004e-06	0.04153	0.0033	0.6938	0.0085	FALSE	TRUE
CD33 on Mo MDSC	Alzheimer's disease	rs7047105	G	A	G	A	-0.1918	6.02296e-07	0.03828	0.0043	0.6241	0.0089	FALSE	TRUE
CD33 on Mo MDSC	Alzheimer's disease	rs73015201	T	C	T	C	-0.1973	6.77704e-06	0.04369	0.0062	0.6109	0.0122	FALSE	TRUE
CD33 on Mo MDSC	Alzheimer's disease	rs73051934	G	A	G	A	-0.5175	4.18398e-06	0.1121	0.0431	0.2248	0.0355	FALSE	TRUE
CD33 on Mo MDSC	Alzheimer's disease	rs73259850	C	A	C	A	-0.3828	4.12098e-07	0.07528	-0.0027	0.8681	0.016	FALSE	TRUE
CD33 on Mo MDSC	Alzheimer's disease	rs7351079	G	A	G	A	-0.3677	9.03441e-18	0.04232	-0.0064	0.6025	0.0122	FALSE	TRUE
CD33 on Mo MDSC	Alzheimer's disease	rs8108687	G	A	G	A	-0.1787	3.65898e-06	0.03845	-0.006	0.5432	0.0098	FALSE	TRUE
CD33 on Mo MDSC	Alzheimer's disease	rs9867350	A	G	A	G	0.2165	7.23303e-06	0.0481	0.0022	0.8234	0.0097	FALSE	TRUE
CD127 on CD8br	Alzheimer's disease	rs10024641	A	G	A	G	0.1143	8.94994e-06	0.0257	0.0003	0.9701	0.0083	FALSE	TRUE
CD127 on CD8br	Alzheimer's disease	rs117239506	A	C	A	C	1.832	3.32499e-06	0.3932	-0.0087	0.7941	0.0333	FALSE	TRUE
CD127 on CD8br	Alzheimer's disease	rs13165333	T	C	T	C	0.1984	2.78702e-06	0.04226	0.0094	0.4163	0.0116	FALSE	TRUE
CD127 on CD8br	Alzheimer's disease	rs1377028	G	A	G	A	-0.1222	2.76898e-06	0.02603	0.015	0.0671707	0.0082	FALSE	TRUE
CD127 on CD8br	Alzheimer's disease	rs148460149	A	G	A	G	0.326	9.27001e-06	0.07341	-0.0454	0.2249	0.0374	FALSE	TRUE
CD127 on CD8br	Alzheimer's disease	rs159608	G	A	G	A	0.1236	9.9339e-06	0.02793	-0.0029	0.7381	0.0088	FALSE	TRUE
CD127 on CD8br	Alzheimer's disease	rs1911151	C	T	C	T	-0.1953	5.39299e-07	0.03888	-0.0129	0.2322	0.0108	FALSE	TRUE
CD127 on CD8br	Alzheimer's disease	rs2009425	T	C	T	C	-0.3232	9.92705e-06	0.07302	-0.0111	0.4974	0.0164	FALSE	TRUE
CD127 on CD8br	Alzheimer's disease	rs28869816	T	G	T	G	0.2939	9.23209e-06	0.06617	0.0037	0.9036	0.0307	FALSE	TRUE
CD127 on CD8br	Alzheimer's disease	rs457979	A	G	A	G	0.2164	2.92799e-06	0.04618	0.02	0.1806	0.0149	FALSE	TRUE
CD127 on CD8br	Alzheimer's disease	rs4668705	A	G	A	G	-0.1189	3.578e-06	0.02562	0.0089	0.2794	0.0082	FALSE	TRUE
CD127 on CD8br	Alzheimer's disease	rs4925660	T	C	T	C	-0.2148	7.21905e-06	0.04779	-0.0063	0.7365	0.0186	FALSE	TRUE
CD127 on CD8br	Alzheimer's disease	rs5770311	G	A	G	A	-0.1216	7.142e-06	0.02704	-0.0076	0.3801	0.0087	FALSE	TRUE
CD127 on CD8br	Alzheimer's disease	rs72824431	C	T	C	T	-0.2416	4.60903e-06	0.05262	0.0056	0.711001	0.0151	FALSE	TRUE
CD127 on CD8br	Alzheimer's disease	rs73354288	T	C	T	C	-0.1928	1.39801e-06	0.03987	0.0213	0.1315	0.0141	FALSE	TRUE
CD127 on CD8br	Alzheimer's disease	rs74785296	A	C	A	C	0.5285	2.38501e-06	0.1118	-0.0101	0.7701	0.0346	FALSE	TRUE
CD127 on CD8br	Alzheimer's disease	rs7643142	T	C	T	C	0.2601	1.86402e-06	0.05444	0.0037	0.763099	0.0122	FALSE	TRUE
CD127 on CD8br	Alzheimer's disease	rs7801342	C	T	C	T	0.1834	1.63399e-09	0.03032	0.0018	0.8391	0.0087	FALSE	TRUE
CD127 on CD8br	Alzheimer's disease	rs7813990	T	C	T	C	0.1488	4.31996e-06	0.03232	-0.0279	0.00263403	0.0093	FALSE	TRUE
CD127 on CD8br	Alzheimer's disease	rs9739743	A	G	A	G	0.1337	9.433e-07	0.0272	0.0013	0.881	0.0089	FALSE	TRUE
CD28+ CD45RA+ CD8br %CD8br	Alzheimer's disease	rs10025910	T	C	T	C	0.5074	1.21099e-06	0.1043	-0.014	0.7092	0.0376	FALSE	TRUE
CD28+ CD45RA+ CD8br %CD8br	Alzheimer's disease	rs10242630	A	G	A	G	0.1978	1.52799e-06	0.04107	0.0029	0.844	0.0149	FALSE	TRUE
CD28+ CD45RA+ CD8br %CD8br	Alzheimer's disease	rs1064086	A	G	A	G	-0.103	2.22998e-07	0.01985	0.0227	0.00711394	0.0084	FALSE	TRUE
CD28+ CD45RA+ CD8br %CD8br	Alzheimer's disease	rs10840675	T	C	T	C	0.1139	7.77804e-06	0.02544	0.0252	0.0141899	0.0103	FALSE	TRUE
CD28+ CD45RA+ CD8br %CD8br	Alzheimer's disease	rs112258643	T	C	T	C	3.271	5.92393e-07	0.6538	-0.0207	0.5434	0.0341	FALSE	TRUE
CD28+ CD45RA+ CD8br %CD8br	Alzheimer's disease	rs117403703	C	T	C	T	3.043	5.72796e-06	0.6699	-0.0092	0.7894	0.0346	FALSE	TRUE
CD28+ CD45RA+ CD8br %CD8br	Alzheimer's disease	rs117475733	T	C	T	C	1.491	4.43997e-06	0.3243	0.0325	0.2483	0.0281	FALSE	TRUE
CD28+ CD45RA+ CD8br %CD8br	Alzheimer's disease	rs139580802	T	C	T	C	1.187	9.90992e-06	0.2682	0.0488	0.1813	0.0365	FALSE	TRUE
CD28+ CD45RA+ CD8br %CD8br	Alzheimer's disease	rs145827119	T	C	T	C	4.134	6.04296e-06	0.9121	-0.0628	0.1645	0.0452	FALSE	TRUE
CD28+ CD45RA+ CD8br %CD8br	Alzheimer's disease	rs146741472	A	G	A	G	3.535	2.69699e-06	0.7519	-0.008	0.8332	0.0378	FALSE	TRUE
CD28+ CD45RA+ CD8br %CD8br	Alzheimer's disease	rs146985291	G	A	G	A	5.539	6.23204e-06	1.224	0.0172	0.6928	0.0436	FALSE	TRUE
CD28+ CD45RA+ CD8br %CD8br	Alzheimer's disease	rs149655274	T	C	T	C	1.504	1.00399e-06	0.3069	0.0624	0.2429	0.0535	FALSE	TRUE
CD28+ CD45RA+ CD8br %CD8br	Alzheimer's disease	rs17583875	A	G	A	G	0.9979	8.81901e-09	0.1731	0.0141	0.6304	0.0293	FALSE	TRUE
CD28+ CD45RA+ CD8br %CD8br	Alzheimer's disease	rs182236332	G	A	G	A	4.274	1.23299e-06	0.8797	-0.0514	0.2804	0.0476	FALSE	TRUE
CD28+ CD45RA+ CD8br %CD8br	Alzheimer's disease	rs184082746	C	T	C	T	3.525	4.41804e-07	0.6966	-0.0275	0.5995	0.0523	FALSE	TRUE
CD28+ CD45RA+ CD8br %CD8br	Alzheimer's disease	rs1879612	C	T	C	T	0.08909	1.59801e-06	0.01853	-0.0075	0.3746	0.0085	FALSE	TRUE
CD28+ CD45RA+ CD8br %CD8br	Alzheimer's disease	rs1978254	A	G	A	G	-0.1733	9.71695e-06	0.03911	0.0596	0.0478498	0.0301	FALSE	TRUE
CD28+ CD45RA+ CD8br %CD8br	Alzheimer's disease	rs2629824	G	A	G	A	-0.1289	1.52901e-07	0.02451	-0.0298	0.000776497	0.0089	FALSE	TRUE
CD28+ CD45RA+ CD8br %CD8br	Alzheimer's disease	rs2802930	T	C	T	C	0.4087	5.60506e-06	0.08986	-0.0174	0.2613	0.0155	FALSE	TRUE
CD28+ CD45RA+ CD8br %CD8br	Alzheimer's disease	rs28460753	A	G	A	G	0.6077	3.11702e-06	0.1301	-0.0413	0.0656206	0.0225	FALSE	TRUE
CD28+ CD45RA+ CD8br %CD8br	Alzheimer's disease	rs28576084	G	T	G	T	0.1012	8.04507e-06	0.02264	-0.0007	0.9422	0.0092	FALSE	TRUE
CD28+ CD45RA+ CD8br %CD8br	Alzheimer's disease	rs34752208	A	G	A	G	0.1011	5.88695e-07	0.0202	-0.0023	0.8205	0.0101	FALSE	TRUE
CD28+ CD45RA+ CD8br %CD8br	Alzheimer's disease	rs5011724	C	T	C	T	-0.09624	2.23398e-06	0.02031	-0.0062	0.4476	0.0082	FALSE	TRUE
CD28+ CD45RA+ CD8br %CD8br	Alzheimer's disease	rs60220946	T	C	T	C	0.2919	7.68299e-06	0.06514	0.0493	0.1232	0.032	FALSE	TRUE
CD28+ CD45RA+ CD8br %CD8br	Alzheimer's disease	rs62572596	T	C	T	C	0.3597	5.79802e-06	0.07921	-0.0287	0.2481	0.0249	FALSE	TRUE
CD28+ CD45RA+ CD8br %CD8br	Alzheimer's disease	rs7033084	T	C	T	C	0.0849	9.438e-06	0.01914	0.009	0.2936	0.0086	FALSE	TRUE
CD28+ CD45RA+ CD8br %CD8br	Alzheimer's disease	rs72723766	C	T	C	T	-2.308	5.68696e-06	0.5078	-0.0031	0.9301	0.0356	FALSE	TRUE
CD28+ CD45RA+ CD8br %CD8br	Alzheimer's disease	rs76014368	T	C	T	C	1.535	8.65605e-06	0.3446	0.017	0.7413	0.0514	FALSE	TRUE
CD28+ CD45RA+ CD8br %CD8br	Alzheimer's disease	rs76313555	T	C	T	C	0.4644	6.09705e-06	0.1025	0.0234	0.3681	0.026	FALSE	TRUE
CD28+ CD45RA+ CD8br %CD8br	Alzheimer's disease	rs79638560	A	C	A	C	-1.499	4.72596e-06	0.327	0.03	0.4038	0.0359	FALSE	TRUE
CD28+ CD45RA+ CD8br %CD8br	Alzheimer's disease	rs9260902	C	T	C	T	-0.117	5.68696e-07	0.02335	0.0148	0.1338	0.0099	FALSE	TRUE
CD28+ CD45RA+ CD8br %CD8br	Alzheimer's disease	rs9577271	G	A	G	A	0.1114	5.45595e-06	0.02447	0.0009	0.9382	0.0111	FALSE	TRUE
CD28+ CD45RA+ CD8br %CD8br	Alzheimer's disease	rs9792050	T	G	T	G	-0.1499	1.72799e-06	0.03129	0.0156	0.2434	0.0134	FALSE	TRUE
CD14+ CD16- monocyte AC	Alzheimer's disease	rs10094039	G	A	G	A	-0.137	9.08908e-07	0.02784	0.0045	0.593	0.0084	FALSE	TRUE
CD14+ CD16- monocyte AC	Alzheimer's disease	rs11177104	A	G	A	G	-0.6203	4.583e-06	0.1351	-0.018	0.4232	0.0225	FALSE	TRUE
CD14+ CD16- monocyte AC	Alzheimer's disease	rs118111037	T	C	T	C	-1.458	6.81397e-06	0.3235	0.0122	0.7065	0.0323	FALSE	TRUE
CD14+ CD16- monocyte AC	Alzheimer's disease	rs12501003	G	A	G	A	0.1613	4.44795e-07	0.03189	-0.0111	0.457	0.0149	FALSE	TRUE
CD14+ CD16- monocyte AC	Alzheimer's disease	rs1375493	A	G	A	G	0.1517	9.91791e-10	0.02476	0.0004	0.9637	0.0082	FALSE	TRUE
CD14+ CD16- monocyte AC	Alzheimer's disease	rs149927978	C	T	C	T	-0.5694	9.36009e-06	0.1283	0.0485	0.3186	0.0486	FALSE	TRUE
CD14+ CD16- monocyte AC	Alzheimer's disease	rs17465420	C	T	C	T	0.1094	9.53103e-06	0.02467	0.0114	0.1734	0.0083	FALSE	TRUE
CD14+ CD16- monocyte AC	Alzheimer's disease	rs183716470	G	T	G	T	-0.2044	6.32004e-06	0.04519	-0.0022	0.9215	0.0223	FALSE	TRUE
CD14+ CD16- monocyte AC	Alzheimer's disease	rs189962728	C	T	C	T	-2.572	5.67205e-06	0.5658	0.0129	0.6872	0.032	FALSE	TRUE
CD14+ CD16- monocyte AC	Alzheimer's disease	rs2120231	G	T	G	T	-0.1154	1.81798e-06	0.02415	0.0011	0.8932	0.0083	FALSE	TRUE
CD14+ CD16- monocyte AC	Alzheimer's disease	rs2247998	A	G	A	G	-0.1145	6.69993e-06	0.0254	0.0179	0.0563495	0.0094	FALSE	TRUE
CD14+ CD16- monocyte AC	Alzheimer's disease	rs2418135	A	G	A	G	-0.1487	1.16001e-09	0.02438	0.0037	0.645601	0.0081	FALSE	TRUE
CD14+ CD16- monocyte AC	Alzheimer's disease	rs28437286	G	A	G	A	-0.3633	8.33105e-06	0.08142	-0.0273	0.305	0.0266	FALSE	TRUE
CD14+ CD16- monocyte AC	Alzheimer's disease	rs2904118	T	C	T	C	-0.1157	6.99407e-06	0.02572	-0.0106	0.2783	0.0098	FALSE	TRUE
CD14+ CD16- monocyte AC	Alzheimer's disease	rs310730	C	T	C	T	0.3004	5.91099e-06	0.06623	-0.0097	0.4846	0.0138	FALSE	TRUE
CD14+ CD16- monocyte AC	Alzheimer's disease	rs41331448	G	A	G	A	0.7646	3.46897e-06	0.1645	0.003	0.945	0.0433	FALSE	TRUE
CD14+ CD16- monocyte AC	Alzheimer's disease	rs445	T	C	T	C	-0.1822	1.36301e-09	0.02999	0.0296	0.02238	0.013	FALSE	TRUE
CD14+ CD16- monocyte AC	Alzheimer's disease	rs536943	G	A	G	A	-0.1442	7.78198e-06	0.03221	0.007	0.5945	0.0131	FALSE	TRUE
CD14+ CD16- monocyte AC	Alzheimer's disease	rs56010301	T	C	T	C	-0.1354	4.34e-06	0.02942	-0.0027	0.8081	0.0111	FALSE	TRUE
CD14+ CD16- monocyte AC	Alzheimer's disease	rs58581511	G	T	G	T	-0.1782	7.11197e-07	0.03587	-0.0111	0.2506	0.0097	FALSE	TRUE
CD14+ CD16- monocyte AC	Alzheimer's disease	rs58943387	G	T	G	T	-0.1471	2.89801e-06	0.0314	0.0005	0.9666	0.0114	FALSE	TRUE
CD14+ CD16- monocyte AC	Alzheimer's disease	rs613224	C	T	C	T	0.3132	6.53296e-07	0.06285	0.0032	0.9185	0.0311	FALSE	TRUE
CD14+ CD16- monocyte AC	Alzheimer's disease	rs8076666	G	A	G	A	0.1284	7.82294e-06	0.02869	0.0102	0.4295	0.0129	FALSE	TRUE
CD14+ CD16- monocyte AC	Alzheimer's disease	rs9599503	C	T	C	T	-0.1276	1.67699e-06	0.02661	0.0104	0.3685	0.0115	FALSE	TRUE
CD39+ CD4+ AC	Alzheimer's disease	rs10800381	T	C	T	C	0.1562	9.37001e-06	0.03519	0.0007	0.9483	0.0102	FALSE	TRUE
CD39+ CD4+ AC	Alzheimer's disease	rs10882324	T	C	T	C	-0.1207	4.96398e-06	0.0264	0.0036	0.706601	0.0095	FALSE	TRUE
CD39+ CD4+ AC	Alzheimer's disease	rs10882701	C	A	C	A	-0.4118	3.85301e-59	0.0249	0.0015	0.8649	0.0086	FALSE	TRUE
CD39+ CD4+ AC	Alzheimer's disease	rs113087753	A	G	A	G	0.2554	6.27393e-06	0.05646	0.0295	0.1974	0.0229	FALSE	TRUE
CD39+ CD4+ AC	Alzheimer's disease	rs114844216	C	T	C	T	0.6311	2.66011e-25	0.06024	0.0472	0.1525	0.033	FALSE	TRUE
CD39+ CD4+ AC	Alzheimer's disease	rs11598645	C	T	C	T	-0.6196	5.74196e-06	0.1364	0.0073	0.798	0.0286	FALSE	TRUE
CD39+ CD4+ AC	Alzheimer's disease	rs11718018	C	T	C	T	-0.1208	3.18002e-06	0.02589	0.0098	0.2448	0.0084	FALSE	TRUE
CD39+ CD4+ AC	Alzheimer's disease	rs12778797	C	T	C	T	0.2544	3.11674e-21	0.02672	-0.016	0.0537898	0.0083	FALSE	TRUE
CD39+ CD4+ AC	Alzheimer's disease	rs139577399	C	T	C	T	-0.3243	4.69105e-07	0.06424	-0.0577	0.1379	0.0389	FALSE	TRUE
CD39+ CD4+ AC	Alzheimer's disease	rs140503524	T	C	T	C	-1.428	3.49398e-06	0.3074	0.0136	0.6427	0.0292	FALSE	TRUE
CD39+ CD4+ AC	Alzheimer's disease	rs1410600	T	C	T	C	-0.2402	1.19812e-19	0.02632	0.01	0.2152	0.0081	FALSE	TRUE
CD39+ CD4+ AC	Alzheimer's disease	rs145557266	G	A	G	A	0.7936	2.4581e-18	0.09034	-0.054	0.0913293	0.032	FALSE	TRUE
CD39+ CD4+ AC	Alzheimer's disease	rs149951966	C	T	C	T	0.1983	4.98896e-06	0.04337	-0.0095	0.3715	0.0107	FALSE	TRUE
CD39+ CD4+ AC	Alzheimer's disease	rs17091864	G	A	G	A	0.5315	9.87802e-06	0.1201	-0.0492	0.104	0.0303	FALSE	TRUE
CD39+ CD4+ AC	Alzheimer's disease	rs191265355	C	T	C	T	1.095	9.40199e-06	0.2467	-0.0605	0.2867	0.0568	FALSE	TRUE
CD39+ CD4+ AC	Alzheimer's disease	rs2251521	T	C	T	C	-0.199	3.35699e-06	0.04274	-0.0176	0.0854398	0.0102	FALSE	TRUE
CD39+ CD4+ AC	Alzheimer's disease	rs35163827	G	A	G	A	-0.3193	7.72592e-06	0.07127	0.0279	0.3656	0.0309	FALSE	TRUE
CD39+ CD4+ AC	Alzheimer's disease	rs4321083	A	G	A	G	0.156	7.07995e-07	0.03139	0.005	0.590999	0.0094	FALSE	TRUE
CD39+ CD4+ AC	Alzheimer's disease	rs57516532	T	C	T	C	0.3142	7.25905e-06	0.06993	-0.029	0.1646	0.0208	FALSE	TRUE
CD39+ CD4+ AC	Alzheimer's disease	rs59143200	C	T	C	T	-0.1181	5.47596e-06	0.02594	-0.0403	3.18801e-05	0.0097	FALSE	TRUE
CD39+ CD4+ AC	Alzheimer's disease	rs62421103	T	G	T	G	0.2313	4.73097e-06	0.05047	-0.007	0.6863	0.0173	FALSE	TRUE
CD39+ CD4+ AC	Alzheimer's disease	rs72968495	C	T	C	T	2.034	5.36698e-06	0.4463	0.0263	0.4216	0.0327	FALSE	TRUE
CD39+ CD4+ AC	Alzheimer's disease	rs74791100	C	T	C	T	0.5331	5.27995e-06	0.1169	0.0615	0.1828	0.0462	FALSE	TRUE
CD39+ CD4+ AC	Alzheimer's disease	rs78027772	A	G	A	G	0.2207	2.151e-06	0.04649	0.0034	0.7927	0.013	FALSE	TRUE
CD39+ CD4+ AC	Alzheimer's disease	rs8076447	A	G	A	G	0.1441	7.47997e-07	0.02906	0.0026	0.8168	0.011	FALSE	TRUE
CD39+ CD4+ AC	Alzheimer's disease	rs821702	G	A	G	A	-0.1393	2.07802e-06	0.0293	-0.0073	0.3964	0.0086	FALSE	TRUE
CD33 on CD33dim HLA DR+ CD11b-	Alzheimer's disease	rs10033650	T	G	T	G	0.2734	1.60299e-06	0.05678	0.019	0.2133	0.0153	FALSE	TRUE
CD33 on CD33dim HLA DR+ CD11b-	Alzheimer's disease	rs10869456	G	A	G	A	-0.2539	3.93704e-06	0.05483	-0.0114	0.2548	0.01	FALSE	TRUE
CD33 on CD33dim HLA DR+ CD11b-	Alzheimer's disease	rs112807165	G	A	G	A	0.4861	4.11898e-06	0.1052	0.032	0.4553	0.0428	FALSE	TRUE
CD33 on CD33dim HLA DR+ CD11b-	Alzheimer's disease	rs113460642	T	C	T	C	0.3152	9.99194e-06	0.07113	-0.0141	0.5975	0.0266	FALSE	TRUE
CD33 on CD33dim HLA DR+ CD11b-	Alzheimer's disease	rs11720960	C	T	C	T	-0.2641	4.94698e-06	0.05763	-0.0121	0.4284	0.0152	FALSE	TRUE
CD33 on CD33dim HLA DR+ CD11b-	Alzheimer's disease	rs138564050	G	A	G	A	-0.2489	6.09607e-06	0.05484	-0.0034	0.7854	0.0124	FALSE	TRUE
CD33 on CD33dim HLA DR+ CD11b-	Alzheimer's disease	rs139876813	T	C	T	C	-0.2801	5.837e-07	0.05585	-0.0102	0.4781	0.0144	FALSE	TRUE
CD33 on CD33dim HLA DR+ CD11b-	Alzheimer's disease	rs1801274	G	A	G	A	-0.261	1.83781e-11	0.03857	0.0103	0.2032	0.0081	FALSE	TRUE
CD33 on CD33dim HLA DR+ CD11b-	Alzheimer's disease	rs35305059	G	A	G	A	0.1619	5.66005e-06	0.03555	0.001	0.9062	0.0085	FALSE	TRUE
CD33 on CD33dim HLA DR+ CD11b-	Alzheimer's disease	rs3865444	A	C	A	C	-1.119	2.39883e-183	0.03392	-0.0337	0.000309999	0.0093	FALSE	TRUE
CD33 on CD33dim HLA DR+ CD11b-	Alzheimer's disease	rs4442789	T	C	T	C	0.2086	6.584e-06	0.04613	-0.0045	0.654	0.01	FALSE	TRUE
CD33 on CD33dim HLA DR+ CD11b-	Alzheimer's disease	rs4802858	C	T	C	T	-0.188	2.06001e-07	0.03603	-0.0111	0.2051	0.0088	FALSE	TRUE
CD33 on CD33dim HLA DR+ CD11b-	Alzheimer's disease	rs558625031	A	G	A	G	-0.6956	1.95884e-17	0.08096	-0.0257	0.4097	0.0312	FALSE	TRUE
CD33 on CD33dim HLA DR+ CD11b-	Alzheimer's disease	rs6100482	G	A	G	A	-0.2023	5.33495e-07	0.04019	-0.0177	0.0942106	0.0106	FALSE	TRUE
CD33 on CD33dim HLA DR+ CD11b-	Alzheimer's disease	rs73051934	G	A	G	A	-0.6094	7.88497e-09	0.105	0.0431	0.2248	0.0355	FALSE	TRUE
CD33 on CD33dim HLA DR+ CD11b-	Alzheimer's disease	rs7351079	G	A	G	A	-0.3832	2.9067e-21	0.03992	-0.0064	0.6025	0.0122	FALSE	TRUE
CD33 on CD33dim HLA DR+ CD11b-	Alzheimer's disease	rs75216873	G	A	G	A	-0.345	3.21203e-06	0.07384	-0.0236	0.4099	0.0286	FALSE	TRUE
CD33 on CD33dim HLA DR+ CD11b-	Alzheimer's disease	rs7798098	T	C	T	C	0.2453	7.44201e-06	0.05456	0.0016	0.8994	0.0126	FALSE	TRUE
CD33 on CD33dim HLA DR+ CD11b-	Alzheimer's disease	rs78949787	T	C	T	C	0.2977	1.33015e-16	0.03561	-0.0022	0.8135	0.0094	FALSE	TRUE
CD33 on CD33dim HLA DR+ CD11b-	Alzheimer's disease	rs9493075	A	G	A	G	-0.3934	1.19399e-06	0.0807	-0.0023	0.8714	0.0141	FALSE	TRUE
CM CD8br %CD8br	Alzheimer's disease	rs116515477	G	A	G	A	0.4004	1.42498e-06	0.0829	-0.0373	0.212	0.0299	FALSE	TRUE
CM CD8br %CD8br	Alzheimer's disease	rs116858348	G	T	G	T	0.5202	5.19697e-06	0.114	-0.0194	0.3702	0.0216	FALSE	TRUE
CM CD8br %CD8br	Alzheimer's disease	rs117299036	T	G	T	G	0.5813	4.27297e-06	0.1262	0.0141	0.6658	0.0326	FALSE	TRUE
CM CD8br %CD8br	Alzheimer's disease	rs11887842	T	C	T	C	-0.1755	8.97098e-06	0.03947	0.0156	0.2812	0.0145	FALSE	TRUE
CM CD8br %CD8br	Alzheimer's disease	rs13037846	T	C	T	C	-0.2959	9.04191e-06	0.06656	0.0153	0.6003	0.0292	FALSE	TRUE
CM CD8br %CD8br	Alzheimer's disease	rs16878206	G	A	G	A	0.1422	9.91791e-06	0.03213	0.0039	0.6775	0.0094	FALSE	TRUE
CM CD8br %CD8br	Alzheimer's disease	rs16881729	T	C	T	C	0.248	8.43995e-06	0.05561	-0.0273	0.1187	0.0175	FALSE	TRUE
CM CD8br %CD8br	Alzheimer's disease	rs183732116	A	G	A	G	0.3128	2.79698e-06	0.06665	-0.0063	0.6687	0.0146	FALSE	TRUE
CM CD8br %CD8br	Alzheimer's disease	rs192829014	A	G	A	G	0.5404	3.96105e-06	0.1169	-0.0137	0.7925	0.0521	FALSE	TRUE
CM CD8br %CD8br	Alzheimer's disease	rs2123414	G	A	G	A	0.2645	8.66702e-06	0.05938	-0.0049	0.7723	0.017	FALSE	TRUE
CM CD8br %CD8br	Alzheimer's disease	rs2424193	G	A	G	A	0.3458	1.275e-06	0.07126	0.0044	0.8412	0.0218	FALSE	TRUE
CM CD8br %CD8br	Alzheimer's disease	rs2713981	G	A	G	A	0.1176	7.00793e-06	0.02613	-0.0063	0.5045	0.0094	FALSE	TRUE
CM CD8br %CD8br	Alzheimer's disease	rs2840005	C	T	C	T	0.1519	2.79402e-06	0.03237	-0.0026	0.8393	0.0128	FALSE	TRUE
CM CD8br %CD8br	Alzheimer's disease	rs350280	G	A	G	A	-0.1208	2.63998e-06	0.02566	-0.0044	0.6079	0.0087	FALSE	TRUE
CM CD8br %CD8br	Alzheimer's disease	rs35069110	A	G	A	G	-0.1233	6.84195e-07	0.02478	-0.0141	0.0855796	0.0082	FALSE	TRUE
CM CD8br %CD8br	Alzheimer's disease	rs35121986	C	T	C	T	0.2568	9.71404e-06	0.05797	0.0208	0.1041	0.0128	FALSE	TRUE
CM CD8br %CD8br	Alzheimer's disease	rs4796089	C	T	C	T	0.1638	8.97202e-06	0.03683	-0.0207	0.151	0.0144	FALSE	TRUE
CM CD8br %CD8br	Alzheimer's disease	rs4868220	G	A	G	A	-0.113	4.617e-06	0.02463	-0.0007	0.9297	0.0083	FALSE	TRUE
CM CD8br %CD8br	Alzheimer's disease	rs541367304	A	G	A	G	-1.186	4.94504e-06	0.2593	0.0454	0.1875	0.0344	FALSE	TRUE
CM CD8br %CD8br	Alzheimer's disease	rs62037700	T	G	T	G	-0.1237	4.76398e-06	0.02699	0.0294	0.02689	0.0133	FALSE	TRUE
CM CD8br %CD8br	Alzheimer's disease	rs62047982	T	C	T	C	-0.1224	8.97904e-07	0.02487	-0.0056	0.556	0.0095	FALSE	TRUE
CM CD8br %CD8br	Alzheimer's disease	rs6558408	A	G	A	G	-0.1456	4.07202e-06	0.03155	0.0264	0.00240802	0.0087	FALSE	TRUE
CM CD8br %CD8br	Alzheimer's disease	rs66550246	G	A	G	A	-0.1351	4.67401e-06	0.02946	-0.0008	0.9463	0.0115	FALSE	TRUE
CM CD8br %CD8br	Alzheimer's disease	rs67145759	G	A	G	A	-0.1373	4.13e-06	0.02976	0.0128	0.228	0.0106	FALSE	TRUE
CM CD8br %CD8br	Alzheimer's disease	rs74559159	A	G	A	G	-0.3646	1.91801e-06	0.07643	0.0063	0.836	0.0303	FALSE	TRUE
CM CD8br %CD8br	Alzheimer's disease	rs75518360	T	C	T	C	0.4829	3.176e-07	0.09427	0.0079	0.8124	0.0333	FALSE	TRUE
CM CD8br %CD8br	Alzheimer's disease	rs78719136	G	A	G	A	-0.3411	6.78907e-06	0.07568	0.0596	0.0617604	0.0319	FALSE	TRUE
CM CD8br %CD8br	Alzheimer's disease	rs78845536	G	T	G	T	0.3273	4.26796e-06	0.07107	-0.0388	0.0922104	0.023	FALSE	TRUE
CD64 on CD14- CD16+ monocyte	Alzheimer's disease	rs10036919	A	G	A	G	-0.129	1.28499e-06	0.02659	0.0175	0.0460204	0.0088	FALSE	TRUE
CD64 on CD14- CD16+ monocyte	Alzheimer's disease	rs11065979	T	C	T	C	0.1181	4.43302e-06	0.0257	-0.0083	0.3093	0.0082	FALSE	TRUE
CD64 on CD14- CD16+ monocyte	Alzheimer's disease	rs111279951	A	C	A	C	0.3	2.323e-06	0.06342	0.0036	0.8547	0.0199	FALSE	TRUE
CD64 on CD14- CD16+ monocyte	Alzheimer's disease	rs1138358	C	A	C	A	0.142	1.75501e-06	0.02965	0.0069	0.4488	0.0091	FALSE	TRUE
CD64 on CD14- CD16+ monocyte	Alzheimer's disease	rs117283705	A	G	A	G	0.5584	5.96005e-06	0.1231	0.0234	0.586001	0.0429	FALSE	TRUE
CD64 on CD14- CD16+ monocyte	Alzheimer's disease	rs117446496	G	A	G	A	-0.2712	5.54102e-06	0.05961	0.0064	0.702901	0.0169	FALSE	TRUE
CD64 on CD14- CD16+ monocyte	Alzheimer's disease	rs11772145	A	C	A	C	-0.1849	4.77705e-06	0.04036	-0.0354	0.00398199	0.0123	FALSE	TRUE
CD64 on CD14- CD16+ monocyte	Alzheimer's disease	rs13161932	G	A	G	A	-0.2119	8.55993e-06	0.04753	-0.004	0.7004	0.0103	FALSE	TRUE
CD64 on CD14- CD16+ monocyte	Alzheimer's disease	rs1333255	A	G	A	G	-0.1577	7.92903e-06	0.03525	0.0021	0.8766	0.0135	FALSE	TRUE
CD64 on CD14- CD16+ monocyte	Alzheimer's disease	rs146963227	A	G	A	G	-0.4704	3.73904e-06	0.1015	0.0211	0.593401	0.0395	FALSE	TRUE
CD64 on CD14- CD16+ monocyte	Alzheimer's disease	rs150145799	C	T	C	T	0.2869	2.35776e-14	0.03746	0.0034	0.8519	0.0181	FALSE	TRUE
CD64 on CD14- CD16+ monocyte	Alzheimer's disease	rs150375532	A	G	A	G	1.124	4.86396e-06	0.2456	0.0285	0.4645	0.0389	FALSE	TRUE
CD64 on CD14- CD16+ monocyte	Alzheimer's disease	rs1932805	T	C	T	C	0.2052	2.49299e-07	0.0397	0.0168	0.1687	0.0122	FALSE	TRUE
CD64 on CD14- CD16+ monocyte	Alzheimer's disease	rs2197098	C	T	C	T	-0.1495	1.15499e-06	0.0307	0.0069	0.517001	0.0107	FALSE	TRUE
CD64 on CD14- CD16+ monocyte	Alzheimer's disease	rs34710782	C	T	C	T	0.1506	1.92101e-06	0.03159	-0.022	0.0233598	0.0097	FALSE	TRUE
CD64 on CD14- CD16+ monocyte	Alzheimer's disease	rs35944461	T	C	T	C	0.198	3.97796e-06	0.04286	-0.0093	0.3312	0.0095	FALSE	TRUE
CD64 on CD14- CD16+ monocyte	Alzheimer's disease	rs9467953	T	C	T	C	-0.1206	4.67197e-06	0.02631	-0.0028	0.7461	0.0088	FALSE	TRUE
CD64 on CD14- CD16+ monocyte	Alzheimer's disease	rs947853	T	C	T	C	0.1222	2.37898e-06	0.02586	-0.003	0.7133	0.0082	FALSE	TRUE
CD33 on basophil	Alzheimer's disease	rs10040068	T	C	T	C	0.1888	9.99194e-06	0.04261	-0.0101	0.269	0.0091	FALSE	TRUE
CD33 on basophil	Alzheimer's disease	rs111695695	A	C	A	C	-0.5454	2.03798e-15	0.06799	-0.0119	0.7002	0.0308	FALSE	TRUE
CD33 on basophil	Alzheimer's disease	rs114475810	A	G	A	G	-2.111	6.35199e-06	0.4661	-0.0366	0.2419	0.0312	FALSE	TRUE
CD33 on basophil	Alzheimer's disease	rs117140964	T	C	T	C	0.4057	4.77101e-06	0.08837	-0.0074	0.7583	0.024	FALSE	TRUE
CD33 on basophil	Alzheimer's disease	rs141122591	C	T	C	T	0.4857	1.367e-06	0.1002	-0.0578	0.4693	0.0799	FALSE	TRUE
CD33 on basophil	Alzheimer's disease	rs1836704	C	A	C	A	-0.1775	9.17191e-06	0.03988	0.0147	0.091829	0.0087	FALSE	TRUE
CD33 on basophil	Alzheimer's disease	rs4567661	C	A	C	A	-0.1841	3.804e-06	0.03969	-0.0067	0.4365	0.0086	FALSE	TRUE
CD33 on basophil	Alzheimer's disease	rs56043070	A	G	A	G	0.4881	6.29593e-10	0.07845	0.0011	0.9464	0.0162	FALSE	TRUE
CD33 on basophil	Alzheimer's disease	rs57883729	A	C	A	C	-0.6872	5.36599e-06	0.1505	0.0165	0.4403	0.0214	FALSE	TRUE
CD33 on basophil	Alzheimer's disease	rs58337014	A	C	A	C	-0.4142	8.39305e-06	0.09267	-0.0094	0.4405	0.0121	FALSE	TRUE
CD33 on basophil	Alzheimer's disease	rs6979650	A	G	A	G	0.4393	8.15793e-06	0.09814	0.0413	0.0581701	0.0218	FALSE	TRUE
CD33 on basophil	Alzheimer's disease	rs7245846	A	G	A	G	-1.131	1.81134e-150	0.03861	-0.0284	0.00207501	0.0092	FALSE	TRUE
CD33 on basophil	Alzheimer's disease	rs72640540	A	G	A	G	-2.857	9.94604e-06	0.6446	0.0168	0.3524	0.018	FALSE	TRUE
CD33 on basophil	Alzheimer's disease	rs7351079	G	A	G	A	-0.3642	1.39991e-17	0.04217	-0.0064	0.6025	0.0122	FALSE	TRUE
CD33 on basophil	Alzheimer's disease	rs75773078	A	G	A	G	-0.4918	4.52898e-12	0.07051	0.0069	0.682299	0.017	FALSE	TRUE
CD33 on basophil	Alzheimer's disease	rs77635331	T	C	T	C	-0.3018	7.83195e-07	0.06084	-0.0208	0.3546	0.0225	FALSE	TRUE
CD33 on basophil	Alzheimer's disease	rs79377141	A	G	A	G	0.3421	1.26386e-13	0.04576	-0.0082	0.615399	0.0163	FALSE	TRUE
CD33 on basophil	Alzheimer's disease	rs8069226	T	C	T	C	0.165	6.97397e-06	0.03658	-0.0025	0.759899	0.0082	FALSE	TRUE
CD4+ AC	Alzheimer's disease	rs10040274	A	G	A	G	0.132	1.064e-06	0.02702	-0.0023	0.8293	0.0108	FALSE	TRUE
CD4+ AC	Alzheimer's disease	rs117563350	G	A	G	A	-0.324	3.12399e-06	0.06938	-0.0113	0.768999	0.0385	FALSE	TRUE
CD4+ AC	Alzheimer's disease	rs137903114	C	T	C	T	-0.9366	8.72107e-07	0.1901	0.0013	0.9636	0.0287	FALSE	TRUE
CD4+ AC	Alzheimer's disease	rs1849876	C	T	C	T	0.1324	1.81301e-06	0.02769	-0.0049	0.604999	0.0095	FALSE	TRUE
CD4+ AC	Alzheimer's disease	rs28578320	C	T	C	T	0.1133	9.7771e-06	0.02558	0.0033	0.706	0.0088	FALSE	TRUE
CD4+ AC	Alzheimer's disease	rs2972073	C	T	C	T	0.1612	7.86104e-06	0.03603	-0.0023	0.8216	0.01	FALSE	TRUE
CD4+ AC	Alzheimer's disease	rs3129891	A	G	A	G	-0.1631	2.32097e-06	0.03448	-0.0198	0.05236	0.0102	FALSE	TRUE
CD4+ AC	Alzheimer's disease	rs3184504	C	T	C	T	-0.1838	7.66126e-12	0.02676	0.0158	0.0517798	0.0081	FALSE	TRUE
CD4+ AC	Alzheimer's disease	rs3211602	A	G	A	G	-1.654	3.879e-06	0.3577	0.0038	0.9122	0.0346	FALSE	TRUE
CD4+ AC	Alzheimer's disease	rs414743	A	G	A	G	0.1352	3.73001e-06	0.02918	-0.0197	0.0313899	0.0092	FALSE	TRUE
CD4+ AC	Alzheimer's disease	rs61935579	A	G	A	G	-0.2776	4.87899e-06	0.06065	-0.0021	0.9186	0.0202	FALSE	TRUE
CD4+ AC	Alzheimer's disease	rs7162344	A	G	A	G	-0.1136	3.37101e-06	0.02442	0.0099	0.2591	0.0088	FALSE	TRUE
CD4+ AC	Alzheimer's disease	rs72960548	C	T	C	T	0.2456	4.341e-07	0.04852	-0.0047	0.789	0.0176	FALSE	TRUE
CD4+ AC	Alzheimer's disease	rs73132830	A	G	A	G	0.1352	7.93597e-06	0.03023	0.0084	0.3536	0.0091	FALSE	TRUE
CD4+ AC	Alzheimer's disease	rs7537437	A	G	A	G	-0.1404	9.06901e-06	0.03159	-0.0123	0.2071	0.0098	FALSE	TRUE
CD4+ AC	Alzheimer's disease	rs78628680	G	A	G	A	0.3565	9.37692e-06	0.08034	0.0086	0.8253	0.0387	FALSE	TRUE
CD4+ AC	Alzheimer's disease	rs905461	C	A	C	A	0.1209	9.48702e-06	0.02726	-0.0009	0.9212	0.0091	FALSE	TRUE
CD4+ AC	Alzheimer's disease	rs9271772	A	G	A	G	0.1877	1.006e-07	0.03517	-0.0199	0.0626397	0.0107	FALSE	TRUE
Lymphocyte AC	Alzheimer's disease	rs10040274	A	G	A	G	0.1212	8.59607e-06	0.02719	-0.0023	0.8293	0.0108	FALSE	TRUE
Lymphocyte AC	Alzheimer's disease	rs10410390	C	T	C	T	0.1125	7.13493e-06	0.02503	0.0129	0.1494	0.0089	FALSE	TRUE
Lymphocyte AC	Alzheimer's disease	rs11702153	T	C	T	C	0.1591	5.75997e-06	0.03503	0.0067	0.5123	0.0102	FALSE	TRUE
Lymphocyte AC	Alzheimer's disease	rs117336432	T	C	T	C	-1.537	4.70695e-06	0.3352	0.0052	0.8796	0.0341	FALSE	TRUE
Lymphocyte AC	Alzheimer's disease	rs11850806	G	T	G	T	-0.6792	2.34299e-07	0.1311	0.0045	0.8671	0.0268	FALSE	TRUE
Lymphocyte AC	Alzheimer's disease	rs12417637	G	A	G	A	0.1866	3.85097e-06	0.04033	-0.0222	0.0966696	0.0133	FALSE	TRUE
Lymphocyte AC	Alzheimer's disease	rs17824379	G	A	G	A	-1.046	4.02903e-06	0.2266	-0.0297	0.3686	0.033	FALSE	TRUE
Lymphocyte AC	Alzheimer's disease	rs2797531	A	G	A	G	0.1303	5.87706e-06	0.02871	0.0037	0.7271	0.0106	FALSE	TRUE
Lymphocyte AC	Alzheimer's disease	rs55802874	G	A	G	A	0.1317	8.15493e-06	0.02947	0.0087	0.3416	0.0091	FALSE	TRUE
Lymphocyte AC	Alzheimer's disease	rs597808	G	A	G	A	-0.1543	9.39399e-09	0.02682	0.0157	0.0535895	0.0081	FALSE	TRUE
Lymphocyte AC	Alzheimer's disease	rs6942586	A	G	A	G	-0.1163	5.96499e-06	0.02565	0.0007	0.9296	0.0084	FALSE	TRUE
Lymphocyte AC	Alzheimer's disease	rs72960548	C	T	C	T	0.2319	2.073e-06	0.04877	-0.0047	0.789	0.0176	FALSE	TRUE
Lymphocyte AC	Alzheimer's disease	rs7302662	C	T	C	T	-0.4219	6.74202e-06	0.09359	0.0273	0.4457	0.0358	FALSE	TRUE
Lymphocyte AC	Alzheimer's disease	rs79508330	T	C	T	C	-0.3326	4.71303e-06	0.07255	0.1195	1.81602e-05	0.0279	FALSE	TRUE
Lymphocyte AC	Alzheimer's disease	rs9271629	A	C	A	C	0.1945	1.646e-08	0.03437	-0.0203	0.0568198	0.0107	FALSE	TRUE
Lymphocyte AC	Alzheimer's disease	rs941767	G	A	G	A	-0.1772	6.11195e-06	0.03912	-0.0135	0.2805	0.0126	FALSE	TRUE
Naive-mature B cell AC	Alzheimer's disease	rs10042327	A	G	A	G	0.233	7.40491e-06	0.05192	-0.0307	0.05426	0.0159	FALSE	TRUE
Naive-mature B cell AC	Alzheimer's disease	rs115150472	T	C	T	C	2.627	5.91398e-06	0.579	-0.0036	0.9177	0.0349	FALSE	TRUE
Naive-mature B cell AC	Alzheimer's disease	rs117344365	A	G	A	G	-0.4129	8.12905e-06	0.09241	0.0077	0.814	0.0329	FALSE	TRUE
Naive-mature B cell AC	Alzheimer's disease	rs12799241	A	G	A	G	0.138	9.06797e-07	0.02805	0.0062	0.5241	0.0097	FALSE	TRUE
Naive-mature B cell AC	Alzheimer's disease	rs139077655	T	C	T	C	-0.1159	4.36697e-06	0.02519	-0.0058	0.5076	0.0087	FALSE	TRUE
Naive-mature B cell AC	Alzheimer's disease	rs143397127	C	T	C	T	-0.4624	3.298e-06	0.09926	-0.0194	0.6086	0.0379	FALSE	TRUE
Naive-mature B cell AC	Alzheimer's disease	rs17056318	C	T	C	T	-0.2366	2.36499e-07	0.0457	-0.007	0.652299	0.0155	FALSE	TRUE
Naive-mature B cell AC	Alzheimer's disease	rs189761842	T	C	T	C	0.7902	3.91796e-06	0.1709	0.0344	0.1924	0.0264	FALSE	TRUE
Naive-mature B cell AC	Alzheimer's disease	rs2286599	A	G	A	G	0.1183	8.96004e-06	0.0266	-0.0073	0.5389	0.0118	FALSE	TRUE
Naive-mature B cell AC	Alzheimer's disease	rs2390504	A	G	A	G	-0.2668	3.51002e-06	0.05743	0.0124	0.2159	0.0101	FALSE	TRUE
Naive-mature B cell AC	Alzheimer's disease	rs2395904	G	T	G	T	-0.1445	1.74e-07	0.02761	-0.0027	0.7619	0.0091	FALSE	TRUE
Naive-mature B cell AC	Alzheimer's disease	rs283340	C	T	C	T	0.1251	4.59505e-07	0.02477	-0.0047	0.5822	0.0085	FALSE	TRUE
Naive-mature B cell AC	Alzheimer's disease	rs34764986	C	T	C	T	-0.2347	1.08201e-06	0.04805	0.0101	0.6941	0.0257	FALSE	TRUE
Naive-mature B cell AC	Alzheimer's disease	rs35607968	T	C	T	C	0.1584	3.71304e-06	0.03419	0.0171	0.1017	0.0105	FALSE	TRUE
Naive-mature B cell AC	Alzheimer's disease	rs3811215	T	G	T	G	-0.1229	5.33495e-06	0.02697	-0.0172	0.0683597	0.0094	FALSE	TRUE
Naive-mature B cell AC	Alzheimer's disease	rs58114937	G	A	G	A	0.1702	2.84499e-06	0.0363	-0.0472	0.00467003	0.0167	FALSE	TRUE
Naive-mature B cell AC	Alzheimer's disease	rs76263497	A	G	A	G	-0.1886	5.33703e-06	0.04138	0.0166	0.1572	0.0117	FALSE	TRUE
Naive-mature B cell AC	Alzheimer's disease	rs76981518	T	C	T	C	-0.2134	6.00897e-06	0.04708	0.0137	0.5677	0.0239	FALSE	TRUE
Naive-mature B cell AC	Alzheimer's disease	rs77983244	A	G	A	G	-0.3088	4.341e-06	0.06711	-0.0383	0.0143499	0.0156	FALSE	TRUE
Naive-mature B cell AC	Alzheimer's disease	rs9564767	G	A	G	A	-0.1163	3.62602e-06	0.02507	-0.0114	0.168	0.0083	FALSE	TRUE
CD3 on CD28- CD8br	Alzheimer's disease	rs10280171	C	T	C	T	-0.5408	2.89701e-06	0.1154	-0.0153	0.3352	0.0158	FALSE	TRUE
CD3 on CD28- CD8br	Alzheimer's disease	rs10861453	G	A	G	A	-0.1298	3.15697e-06	0.0278	0.0069	0.3966	0.0082	FALSE	TRUE
CD3 on CD28- CD8br	Alzheimer's disease	rs12570957	A	C	A	C	0.1445	2.88098e-06	0.03082	0.003	0.721	0.0083	FALSE	TRUE
CD3 on CD28- CD8br	Alzheimer's disease	rs141566851	A	G	A	G	-0.5188	5.04104e-06	0.1135	-0.0343	0.3897	0.0399	FALSE	TRUE
CD3 on CD28- CD8br	Alzheimer's disease	rs1542545	C	T	C	T	-0.1677	2.90998e-06	0.03579	0.0068	0.4359	0.0088	FALSE	TRUE
CD3 on CD28- CD8br	Alzheimer's disease	rs28620385	C	T	C	T	0.14	1.66598e-06	0.02917	0.01	0.2699	0.0091	FALSE	TRUE
CD3 on CD28- CD8br	Alzheimer's disease	rs2988279	A	G	A	G	0.2396	1.75388e-18	0.02713	0.0165	0.0467401	0.0083	FALSE	TRUE
CD3 on CD28- CD8br	Alzheimer's disease	rs6120663	A	C	A	C	-0.1254	4.67703e-06	0.02733	-0.0181	0.0266803	0.0082	FALSE	TRUE
CD3 on CD28- CD8br	Alzheimer's disease	rs62574602	C	T	C	T	-0.5914	9.7389e-06	0.1335	0.0028	0.9222	0.0282	FALSE	TRUE
CD3 on CD28- CD8br	Alzheimer's disease	rs6564225	C	A	C	A	-0.1551	8.16507e-06	0.0347	-0.0029	0.774499	0.01	FALSE	TRUE
CD3 on CD28- CD8br	Alzheimer's disease	rs72975607	A	G	A	G	0.2633	6.40398e-06	0.05824	-0.0102	0.5736	0.0182	FALSE	TRUE
CD3 on CD28- CD8br	Alzheimer's disease	rs77294768	A	G	A	G	-0.188	5.59397e-06	0.04133	-0.0046	0.747699	0.0142	FALSE	TRUE
CD3 on CD28- CD8br	Alzheimer's disease	rs947505	G	A	G	A	0.2201	3.55001e-06	0.04738	0.0058	0.6304	0.012	FALSE	TRUE
CD27 on CD20- CD38-	Alzheimer's disease	rs10042952	A	C	A	C	-0.1577	7.24703e-06	0.03509	-0.0026	0.8519	0.0141	FALSE	TRUE
CD27 on CD20- CD38-	Alzheimer's disease	rs10740344	T	C	T	C	-0.1301	1.52999e-06	0.02703	0.0059	0.4953	0.0087	FALSE	TRUE
CD27 on CD20- CD38-	Alzheimer's disease	rs10763431	C	T	C	T	0.1126	7.07701e-06	0.02504	-0.0029	0.729201	0.0084	FALSE	TRUE
CD27 on CD20- CD38-	Alzheimer's disease	rs113532966	C	T	C	T	0.1937	4.86598e-06	0.04232	0.0119	0.4954	0.0174	FALSE	TRUE
CD27 on CD20- CD38-	Alzheimer's disease	rs115412883	G	A	G	A	0.6043	9.96805e-06	0.1366	-0.039	0.2663	0.035	FALSE	TRUE
CD27 on CD20- CD38-	Alzheimer's disease	rs118135815	G	A	G	A	1.931	2.84001e-06	0.4117	0.0231	0.5988	0.0439	FALSE	TRUE
CD27 on CD20- CD38-	Alzheimer's disease	rs139998	C	T	C	T	-0.121	5.40194e-06	0.02655	-0.0126	0.2277	0.0104	FALSE	TRUE
CD27 on CD20- CD38-	Alzheimer's disease	rs147153707	A	G	A	G	0.5283	1.64399e-06	0.11	-0.0162	0.7118	0.0439	FALSE	TRUE
CD27 on CD20- CD38-	Alzheimer's disease	rs147680281	T	C	T	C	2.007	4.92096e-06	0.4386	-0.0408	0.2374	0.0345	FALSE	TRUE
CD27 on CD20- CD38-	Alzheimer's disease	rs1785249	T	C	T	C	-0.1234	5.08604e-07	0.02452	-0.0041	0.6373	0.0087	FALSE	TRUE
CD27 on CD20- CD38-	Alzheimer's disease	rs2024568	C	T	C	T	-0.118	2.488e-06	0.02501	0.0038	0.6805	0.0093	FALSE	TRUE
CD27 on CD20- CD38-	Alzheimer's disease	rs61566441	T	C	T	C	0.1244	3.95003e-06	0.02693	0.0203	0.0521495	0.0105	FALSE	TRUE
CD27 on CD20- CD38-	Alzheimer's disease	rs7007180	G	T	G	T	0.1322	4.60999e-06	0.0288	0.0062	0.4997	0.0091	FALSE	TRUE
CD27 on CD20- CD38-	Alzheimer's disease	rs7114298	G	A	G	A	-0.1221	6.08597e-06	0.02695	0.0204	0.0167598	0.0085	FALSE	TRUE
CD27 on CD20- CD38-	Alzheimer's disease	rs74432706	T	C	T	C	0.3494	5.23299e-06	0.0766	-0.0026	0.889	0.0188	FALSE	TRUE
CD27 on CD20- CD38-	Alzheimer's disease	rs74551235	A	G	A	G	-0.2031	1.15001e-06	0.04168	0.0292	0.0280602	0.0133	FALSE	TRUE
CD27 on CD20- CD38-	Alzheimer's disease	rs8072367	C	T	C	T	-0.1944	5.05801e-06	0.04255	0.01	0.4479	0.0131	FALSE	TRUE
CD27 on CD20- CD38-	Alzheimer's disease	rs909973	G	A	G	A	0.4996	2.80498e-06	0.1065	0.0406	0.1263	0.0266	FALSE	TRUE
CD27 on CD20- CD38-	Alzheimer's disease	rs9914679	T	C	T	C	-0.1266	4.678e-06	0.0276	0.0006	0.9583	0.0108	FALSE	TRUE
CD4 on HLA DR+ CD4+	Alzheimer's disease	rs10047088	C	T	C	T	0.1915	3.378e-06	0.04113	-0.0536	0.00571702	0.0194	FALSE	TRUE
CD4 on HLA DR+ CD4+	Alzheimer's disease	rs10179730	A	G	A	G	0.1972	8.83405e-06	0.04429	0.0189	0.1215	0.0122	FALSE	TRUE
CD4 on HLA DR+ CD4+	Alzheimer's disease	rs10517576	C	T	C	T	0.578	3.46402e-06	0.1243	0.0145	0.567	0.0252	FALSE	TRUE
CD4 on HLA DR+ CD4+	Alzheimer's disease	rs10518646	T	C	T	C	0.5055	8.82308e-06	0.1135	0.0031	0.902	0.0248	FALSE	TRUE
CD4 on HLA DR+ CD4+	Alzheimer's disease	rs10946649	T	C	T	C	0.2637	1.78599e-06	0.0551	0.0634	0.00599004	0.0231	FALSE	TRUE
CD4 on HLA DR+ CD4+	Alzheimer's disease	rs11614716	G	T	G	T	-0.1537	6.827e-07	0.03089	0.0094	0.2977	0.009	FALSE	TRUE
CD4 on HLA DR+ CD4+	Alzheimer's disease	rs12684941	G	A	G	A	-0.1207	6.03601e-06	0.02664	-0.0013	0.874	0.0083	FALSE	TRUE
CD4 on HLA DR+ CD4+	Alzheimer's disease	rs13316780	C	T	C	T	0.5642	4.72204e-06	0.1231	-0.0101	0.699301	0.026	FALSE	TRUE
CD4 on HLA DR+ CD4+	Alzheimer's disease	rs17002700	G	T	G	T	0.1481	7.86502e-06	0.03309	0.0158	0.1477	0.0109	FALSE	TRUE
CD4 on HLA DR+ CD4+	Alzheimer's disease	rs184989157	T	C	T	C	-0.3183	8.91497e-06	0.07154	-0.0023	0.9452	0.0337	FALSE	TRUE
CD4 on HLA DR+ CD4+	Alzheimer's disease	rs35032648	C	T	C	T	0.1191	7.43807e-06	0.02653	-0.0033	0.6891	0.0082	FALSE	TRUE
CD4 on HLA DR+ CD4+	Alzheimer's disease	rs4371876	A	G	A	G	0.1831	1.98802e-10	0.02869	-0.0027	0.749799	0.0085	FALSE	TRUE
CD4 on HLA DR+ CD4+	Alzheimer's disease	rs75559970	T	G	T	G	0.5299	5.32905e-07	0.1055	0.0088	0.725401	0.0251	FALSE	TRUE
CD4 on HLA DR+ CD4+	Alzheimer's disease	rs9357097	T	C	T	C	0.1669	2.57199e-09	0.02793	-0.0293	0.00159801	0.0093	FALSE	TRUE
CD20 on unsw mem	Alzheimer's disease	rs10047347	T	C	T	C	0.117	4.78498e-06	0.02555	0.0044	0.604399	0.0086	FALSE	TRUE
CD20 on unsw mem	Alzheimer's disease	rs112405902	A	G	A	G	0.2604	1.74699e-08	0.0461	0.0226	0.3025	0.0219	FALSE	TRUE
CD20 on unsw mem	Alzheimer's disease	rs12554596	G	A	G	A	-0.1329	1.91699e-07	0.02547	0.0029	0.7738	0.0101	FALSE	TRUE
CD20 on unsw mem	Alzheimer's disease	rs13133046	G	A	G	A	-0.3755	1.38401e-06	0.07765	0.0077	0.5968	0.0145	FALSE	TRUE
CD20 on unsw mem	Alzheimer's disease	rs149214933	G	T	G	T	-0.7343	7.74694e-06	0.164	0.0259	0.513499	0.0396	FALSE	TRUE
CD20 on unsw mem	Alzheimer's disease	rs149312070	T	C	T	C	1.036	8.62402e-06	0.2325	0.0324	0.4506	0.0429	FALSE	TRUE
CD20 on unsw mem	Alzheimer's disease	rs149695230	G	T	G	T	0.1869	3.31398e-06	0.04012	-0.0108	0.4905	0.0156	FALSE	TRUE
CD20 on unsw mem	Alzheimer's disease	rs182220218	G	A	G	A	-2.625	5.54294e-06	0.5769	-0.0121	0.776499	0.0426	FALSE	TRUE
CD20 on unsw mem	Alzheimer's disease	rs2114442	T	C	T	C	0.1119	8.23607e-06	0.02506	0.0089	0.2781	0.0082	FALSE	TRUE
CD20 on unsw mem	Alzheimer's disease	rs233495	T	C	T	C	-0.1166	2.53303e-06	0.02474	-0.0037	0.6581	0.0083	FALSE	TRUE
CD20 on unsw mem	Alzheimer's disease	rs2523761	G	A	G	A	0.2051	3.97704e-07	0.04038	0.0356	0.001078	0.0109	FALSE	TRUE
CD20 on unsw mem	Alzheimer's disease	rs4447195	T	C	T	C	-0.2525	1.45301e-09	0.04163	-0.0219	0.1422	0.0149	FALSE	TRUE
CD20 on unsw mem	Alzheimer's disease	rs6459417	T	C	T	C	0.2282	7.24803e-10	0.03694	0.0208	0.141	0.0141	FALSE	TRUE
CD20 on unsw mem	Alzheimer's disease	rs6509428	T	C	T	C	-0.2404	2.09218e-16	0.02912	-0.0148	0.1368	0.0099	FALSE	TRUE
CD20 on unsw mem	Alzheimer's disease	rs77330263	T	C	T	C	0.538	3.38197e-06	0.1156	-0.0512	0.1385	0.0346	FALSE	TRUE
CD20 on unsw mem	Alzheimer's disease	rs77612075	T	C	T	C	0.3517	9.46194e-07	0.07161	0.0056	0.7612	0.0183	FALSE	TRUE
CD20 on unsw mem	Alzheimer's disease	rs78398983	A	G	A	G	1.716	2.84197e-06	0.366	-0.0106	0.7681	0.0359	FALSE	TRUE
CD20 on unsw mem	Alzheimer's disease	rs9310657	G	T	G	T	0.1311	4.581e-06	0.02856	-0.0066	0.4821	0.0093	FALSE	TRUE
CD25 on IgD+ CD38br	Alzheimer's disease	rs10765088	A	G	A	G	-0.1198	8.33892e-07	0.02428	-0.0117	0.1746	0.0086	FALSE	TRUE
CD25 on IgD+ CD38br	Alzheimer's disease	rs11616609	T	G	T	G	-0.1207	2.10199e-06	0.02541	0.0068	0.4356	0.0087	FALSE	TRUE
CD25 on IgD+ CD38br	Alzheimer's disease	rs12341626	C	T	C	T	-0.1597	4.09996e-06	0.03463	0.0003	0.978	0.0103	FALSE	TRUE
CD25 on IgD+ CD38br	Alzheimer's disease	rs145198352	C	T	C	T	-0.4484	6.96594e-06	0.09962	-0.0211	0.5011	0.0313	FALSE	TRUE
CD25 on IgD+ CD38br	Alzheimer's disease	rs2566772	A	G	A	G	0.4644	8.33201e-06	0.1041	0.0106	0.616601	0.0212	FALSE	TRUE
CD25 on IgD+ CD38br	Alzheimer's disease	rs3793662	T	C	T	C	-0.1813	4.37895e-10	0.02898	0.0041	0.690799	0.0103	FALSE	TRUE
CD25 on IgD+ CD38br	Alzheimer's disease	rs4129608	G	A	G	A	-0.1638	2.27101e-06	0.03459	-0.0185	0.1055	0.0114	FALSE	TRUE
CD25 on IgD+ CD38br	Alzheimer's disease	rs4721574	A	G	A	G	0.1486	6.697e-08	0.02746	-0.0071	0.4349	0.0091	FALSE	TRUE
CD25 on IgD+ CD38br	Alzheimer's disease	rs6092493	G	A	G	A	-0.1116	6.68806e-06	0.02475	0.0136	0.1058	0.0084	FALSE	TRUE
CD25 on IgD+ CD38br	Alzheimer's disease	rs62626323	A	C	A	C	0.349	3.53671e-18	0.03994	-0.017	0.3261	0.0173	FALSE	TRUE
CD25 on IgD+ CD38br	Alzheimer's disease	rs6550133	C	T	C	T	-0.1637	2.74202e-07	0.0318	0.0026	0.8301	0.0119	FALSE	TRUE
CD25 on IgD+ CD38br	Alzheimer's disease	rs9596941	G	T	G	T	0.2115	2.585e-06	0.04491	-0.0007	0.9667	0.0164	FALSE	TRUE
CD25 on transitional	Alzheimer's disease	rs11099673	G	A	G	A	0.115	8.26304e-06	0.02576	-0.004	0.6599	0.009	FALSE	TRUE
CD25 on transitional	Alzheimer's disease	rs117473115	T	C	T	C	0.3516	5.02505e-07	0.06985	-0.02	0.5031	0.0298	FALSE	TRUE
CD25 on transitional	Alzheimer's disease	rs12822478	A	C	A	C	-0.1156	4.20397e-06	0.02508	-0.0001	0.9909	0.0084	FALSE	TRUE
CD25 on transitional	Alzheimer's disease	rs140685335	G	A	G	A	0.3598	1.92101e-06	0.07544	-0.0143	0.61	0.0279	FALSE	TRUE
CD25 on transitional	Alzheimer's disease	rs144997167	T	C	T	C	1.298	5.34897e-06	0.2849	-0.0149	0.6957	0.038	FALSE	TRUE
CD25 on transitional	Alzheimer's disease	rs148702440	A	G	A	G	-0.3649	9.03899e-06	0.08209	-0.027	0.4037	0.0323	FALSE	TRUE
CD25 on transitional	Alzheimer's disease	rs151006498	T	C	T	C	-0.5983	4.30804e-06	0.13	0.0574	0.1803	0.0428	FALSE	TRUE
CD25 on transitional	Alzheimer's disease	rs181825	A	G	A	G	0.3147	4.11197e-06	0.06823	0.0194	0.229	0.0161	FALSE	TRUE
CD25 on transitional	Alzheimer's disease	rs34513850	G	A	G	A	0.425	5.35106e-06	0.09326	0.0203	0.582	0.0368	FALSE	TRUE
CD25 on transitional	Alzheimer's disease	rs3793662	T	C	T	C	-0.1557	9.9481e-08	0.02917	0.0041	0.690799	0.0103	FALSE	TRUE
CD25 on transitional	Alzheimer's disease	rs4129608	G	A	G	A	-0.1555	8.18107e-06	0.03481	-0.0185	0.1055	0.0114	FALSE	TRUE
CD25 on transitional	Alzheimer's disease	rs4721574	A	G	A	G	0.1421	2.84001e-07	0.02762	-0.0071	0.4349	0.0091	FALSE	TRUE
CD25 on transitional	Alzheimer's disease	rs474490	G	T	G	T	-0.1399	7.79902e-06	0.03126	-0.0088	0.3607	0.0096	FALSE	TRUE
CD25 on transitional	Alzheimer's disease	rs61945276	A	G	A	G	-0.3331	4.03497e-06	0.07215	0.0229	0.3242	0.0232	FALSE	TRUE
CD25 on transitional	Alzheimer's disease	rs62626323	A	C	A	C	0.2969	1.77787e-13	0.04016	-0.017	0.3261	0.0173	FALSE	TRUE
CD25 on transitional	Alzheimer's disease	rs6550133	C	T	C	T	-0.1486	3.498e-06	0.03197	0.0026	0.8301	0.0119	FALSE	TRUE
CD25 on transitional	Alzheimer's disease	rs74709342	G	A	G	A	0.2699	8.58401e-06	0.06057	0.0193	0.2389	0.0164	FALSE	TRUE
CD25 on transitional	Alzheimer's disease	rs76153918	T	C	T	C	0.8159	8.89508e-06	0.1834	0.0166	0.5037	0.0249	FALSE	TRUE
CD25 on transitional	Alzheimer's disease	rs78716865	T	C	T	C	-1.241	6.12294e-06	0.274	0.0175	0.7134	0.0475	FALSE	TRUE
CD25 on transitional	Alzheimer's disease	rs7899857	A	G	A	G	-0.1303	1.69602e-06	0.02718	0.0205	0.0230999	0.009	FALSE	TRUE
CD25 on transitional	Alzheimer's disease	rs876043	G	A	G	A	-0.1306	6.85693e-06	0.029	-0.0043	0.6903	0.0107	FALSE	TRUE
T cell AC	Alzheimer's disease	rs11702153	T	C	T	C	0.1568	5.546e-06	0.03447	0.0067	0.5123	0.0102	FALSE	TRUE
T cell AC	Alzheimer's disease	rs117391590	A	G	A	G	-0.2678	9.39507e-06	0.06035	-0.019	0.4137	0.0232	FALSE	TRUE
T cell AC	Alzheimer's disease	rs11850806	G	T	G	T	-0.6286	1.16799e-06	0.1291	0.0045	0.8671	0.0268	FALSE	TRUE
T cell AC	Alzheimer's disease	rs13207893	C	T	C	T	-0.1488	1.448e-06	0.03084	0.0106	0.4282	0.0134	FALSE	TRUE
T cell AC	Alzheimer's disease	rs1550856	G	A	G	A	-0.1325	7.31695e-06	0.0295	0.0092	0.4862	0.0133	FALSE	TRUE
T cell AC	Alzheimer's disease	rs17283318	T	C	T	C	-0.274	4.59198e-06	0.0597	-0.0223	0.4704	0.0308	FALSE	TRUE
T cell AC	Alzheimer's disease	rs17339549	A	G	A	G	0.1161	4.12401e-06	0.02516	-0.0191	0.0354503	0.0091	FALSE	TRUE
T cell AC	Alzheimer's disease	rs3184504	C	T	C	T	-0.1468	2.64698e-08	0.02633	0.0158	0.0517798	0.0081	FALSE	TRUE
T cell AC	Alzheimer's disease	rs35669214	C	T	C	T	-0.1231	8.31094e-06	0.02758	0.0242	0.0190999	0.0103	FALSE	TRUE
T cell AC	Alzheimer's disease	rs414743	A	G	A	G	0.1311	5.74103e-06	0.02887	-0.0197	0.0313899	0.0092	FALSE	TRUE
T cell AC	Alzheimer's disease	rs62447160	C	T	C	T	-0.1152	5.12094e-06	0.02524	0.0013	0.8758	0.0085	FALSE	TRUE
T cell AC	Alzheimer's disease	rs72960548	C	T	C	T	0.2563	9.61701e-08	0.04796	-0.0047	0.789	0.0176	FALSE	TRUE
T cell AC	Alzheimer's disease	rs75308045	G	A	G	A	-0.1332	8.24992e-07	0.02697	0.0039	0.6761	0.0093	FALSE	TRUE
T cell AC	Alzheimer's disease	rs75995320	A	G	A	G	-0.4299	1.31099e-06	0.08871	-0.0457	0.1378	0.0308	FALSE	TRUE
T cell AC	Alzheimer's disease	rs76560336	T	C	T	C	-0.6975	7.33398e-06	0.1553	0.007	0.8035	0.0281	FALSE	TRUE
T cell AC	Alzheimer's disease	rs9271622	A	G	A	G	0.2154	2.139e-10	0.03382	-0.0185	0.0731695	0.0103	FALSE	TRUE
HLA DR+ CD4+ %T cell	Alzheimer's disease	rs10052603	G	A	G	A	-0.1031	3.38704e-06	0.02216	-0.014	0.091601	0.0083	FALSE	TRUE
HLA DR+ CD4+ %T cell	Alzheimer's disease	rs11090233	A	G	A	G	-0.09863	8.27199e-06	0.02209	-0.0026	0.7543	0.0083	FALSE	TRUE
HLA DR+ CD4+ %T cell	Alzheimer's disease	rs116253486	C	T	C	T	-1.176	9.63807e-06	0.2655	0.0078	0.8202	0.0342	FALSE	TRUE
HLA DR+ CD4+ %T cell	Alzheimer's disease	rs11641185	T	C	T	C	-0.2989	4.5196e-32	0.02511	0.0093	0.3357	0.0097	FALSE	TRUE
HLA DR+ CD4+ %T cell	Alzheimer's disease	rs117110835	A	G	A	G	-0.7092	7.703e-06	0.1583	0.0102	0.6367	0.0215	FALSE	TRUE
HLA DR+ CD4+ %T cell	Alzheimer's disease	rs117816082	G	A	G	A	0.5775	9.40892e-06	0.1302	0.0136	0.658701	0.0309	FALSE	TRUE
HLA DR+ CD4+ %T cell	Alzheimer's disease	rs117868023	A	G	A	G	-0.4255	6.27798e-06	0.09406	0.0015	0.972	0.0422	FALSE	TRUE
HLA DR+ CD4+ %T cell	Alzheimer's disease	rs12609975	G	A	G	A	-0.1105	2.434e-06	0.02341	-0.0005	0.9577	0.0093	FALSE	TRUE
HLA DR+ CD4+ %T cell	Alzheimer's disease	rs140410174	T	C	T	C	-0.209	5.68997e-06	0.04598	-0.006	0.8158	0.0259	FALSE	TRUE
HLA DR+ CD4+ %T cell	Alzheimer's disease	rs146016042	A	G	A	G	-0.5232	6.11294e-06	0.1155	0.0023	0.9559	0.0415	FALSE	TRUE
HLA DR+ CD4+ %T cell	Alzheimer's disease	rs149004280	T	C	T	C	-0.5593	2.67898e-06	0.119	-0.009	0.8157	0.0387	FALSE	TRUE
HLA DR+ CD4+ %T cell	Alzheimer's disease	rs150440365	G	A	G	A	-0.5324	5.50605e-06	0.117	-0.1309	0.00796691	0.0493	FALSE	TRUE
HLA DR+ CD4+ %T cell	Alzheimer's disease	rs1832967	A	C	A	C	-0.1195	3.26302e-06	0.02563	0.0082	0.3471	0.0087	FALSE	TRUE
HLA DR+ CD4+ %T cell	Alzheimer's disease	rs4867947	A	C	A	C	0.1895	9.02194e-06	0.04263	0.0144	0.1919	0.011	FALSE	TRUE
HLA DR+ CD4+ %T cell	Alzheimer's disease	rs4906573	C	T	C	T	0.1137	9.33706e-06	0.02563	-0.0157	0.0786394	0.009	FALSE	TRUE
HLA DR+ CD4+ %T cell	Alzheimer's disease	rs6071096	C	T	C	T	-0.1051	2.49098e-06	0.02228	0.008	0.3615	0.0088	FALSE	TRUE
HLA DR+ CD4+ %T cell	Alzheimer's disease	rs646262	G	A	G	A	0.1107	6.04895e-06	0.02442	0.0172	0.0521795	0.0088	FALSE	TRUE
HLA DR+ CD4+ %T cell	Alzheimer's disease	rs7032773	T	C	T	C	-0.1199	1.54999e-07	0.02281	-0.0014	0.8617	0.0082	FALSE	TRUE
HLA DR+ CD4+ %T cell	Alzheimer's disease	rs7088079	A	G	A	G	-0.1728	4.13599e-06	0.03748	0.0124	0.4941	0.0181	FALSE	TRUE
HLA DR+ CD4+ %T cell	Alzheimer's disease	rs7202106	T	C	T	C	0.1188	6.63804e-06	0.02634	0.0124	0.1959	0.0096	FALSE	TRUE
HLA DR+ CD4+ %T cell	Alzheimer's disease	rs73062743	T	C	T	C	0.1528	7.86502e-06	0.03413	0.0215	0.2084	0.0171	FALSE	TRUE
HLA DR+ CD4+ %T cell	Alzheimer's disease	rs79563199	A	C	A	C	-0.1399	4.51596e-06	0.03045	-0.0077	0.616799	0.0153	FALSE	TRUE
HLA DR+ CD4+ %T cell	Alzheimer's disease	rs7972178	T	G	T	G	0.1108	1.05e-06	0.02265	-0.0007	0.9419	0.0095	FALSE	TRUE
HLA DR+ CD4+ %T cell	Alzheimer's disease	rs80226392	G	A	G	A	-0.1415	5.86098e-06	0.03118	-0.0062	0.725499	0.0175	FALSE	TRUE
HLA DR+ CD4+ %T cell	Alzheimer's disease	rs8055544	T	G	T	G	0.1124	6.25994e-06	0.02485	0.0059	0.4732	0.0083	FALSE	TRUE
B cell AC	Alzheimer's disease	rs1057686	G	A	G	A	-0.1735	1.95898e-06	0.0364	0.0105	0.345	0.0111	FALSE	TRUE
B cell AC	Alzheimer's disease	rs11627066	T	C	T	C	-0.1147	2.813e-06	0.02444	0.0177	0.0333903	0.0083	FALSE	TRUE
B cell AC	Alzheimer's disease	rs11666499	G	A	G	A	0.1913	5.95799e-06	0.0422	-0.007	0.5336	0.0112	FALSE	TRUE
B cell AC	Alzheimer's disease	rs117693242	G	A	G	A	-0.4542	3.48401e-06	0.09774	0.0187	0.59	0.0346	FALSE	TRUE
B cell AC	Alzheimer's disease	rs12865434	G	A	G	A	0.1537	1.834e-10	0.02404	-0.0163	0.0957503	0.0098	FALSE	TRUE
B cell AC	Alzheimer's disease	rs13173982	A	G	A	G	0.1243	9.78003e-06	0.02807	-0.0062	0.632199	0.0129	FALSE	TRUE
B cell AC	Alzheimer's disease	rs142089808	G	A	G	A	-1.048	7.03801e-08	0.1941	0.0328	0.2282	0.0272	FALSE	TRUE
B cell AC	Alzheimer's disease	rs144825213	A	G	A	G	-1.553	7.27998e-06	0.3457	0.0189	0.6391	0.0403	FALSE	TRUE
B cell AC	Alzheimer's disease	rs17113368	T	C	T	C	0.1875	7.19201e-06	0.04172	0.0028	0.8333	0.0133	FALSE	TRUE
B cell AC	Alzheimer's disease	rs182527768	A	G	A	G	-0.3328	5.90799e-07	0.06652	0.024	0.5686	0.0421	FALSE	TRUE
B cell AC	Alzheimer's disease	rs1897558	C	A	C	A	-0.1305	3.30499e-06	0.02801	0.0178	0.0545595	0.0093	FALSE	TRUE
B cell AC	Alzheimer's disease	rs1966302	C	T	C	T	-0.1213	5.52497e-07	0.02419	-0.0271	0.00152598	0.0085	FALSE	TRUE
B cell AC	Alzheimer's disease	rs2033489	T	C	T	C	0.1073	9.16896e-06	0.02416	0.009	0.3141	0.0089	FALSE	TRUE
B cell AC	Alzheimer's disease	rs2395904	G	T	G	T	-0.1269	3.312e-06	0.02725	-0.0027	0.7619	0.0091	FALSE	TRUE
B cell AC	Alzheimer's disease	rs35606919	G	T	G	T	0.1779	6.01506e-06	0.03926	0.005	0.8596	0.0282	FALSE	TRUE
B cell AC	Alzheimer's disease	rs4933299	T	G	T	G	-0.1282	8.16808e-06	0.02869	-0.0088	0.3163	0.0087	FALSE	TRUE
B cell AC	Alzheimer's disease	rs5009526	G	A	G	A	-0.1516	8.01493e-06	0.03391	-0.0103	0.3864	0.0119	FALSE	TRUE
B cell AC	Alzheimer's disease	rs5756641	A	G	A	G	-0.1362	4.74002e-06	0.02972	-0.0118	0.2678	0.0107	FALSE	TRUE
B cell AC	Alzheimer's disease	rs58114937	G	A	G	A	0.1852	2.377e-07	0.03578	-0.0472	0.00467003	0.0167	FALSE	TRUE
B cell AC	Alzheimer's disease	rs62061834	C	T	C	T	0.2608	2.26199e-06	0.05507	-0.0261	0.1432	0.0178	FALSE	TRUE
B cell AC	Alzheimer's disease	rs6750281	G	A	G	A	0.1112	8.12101e-06	0.02488	0.0199	0.01601	0.0083	FALSE	TRUE
B cell AC	Alzheimer's disease	rs7210666	C	T	C	T	-0.129	9.87302e-06	0.02915	0.0019	0.8331	0.0092	FALSE	TRUE
B cell AC	Alzheimer's disease	rs73520180	C	T	C	T	0.4493	1.213e-07	0.08473	0.0172	0.2848	0.0161	FALSE	TRUE
B cell AC	Alzheimer's disease	rs7500855	T	C	T	C	-0.1258	2.509e-07	0.02435	0.011	0.1833	0.0083	FALSE	TRUE
B cell AC	Alzheimer's disease	rs75270114	G	T	G	T	0.2916	6.96803e-06	0.06479	0.0052	0.8847	0.036	FALSE	TRUE
B cell AC	Alzheimer's disease	rs7834992	G	A	G	A	0.1209	3.68697e-06	0.02608	-0.0078	0.4175	0.0096	FALSE	TRUE
B cell AC	Alzheimer's disease	rs9460146	C	T	C	T	0.144	7.22304e-06	0.03204	-0.0108	0.3038	0.0105	FALSE	TRUE
B cell AC	Alzheimer's disease	rs9883798	A	C	A	C	0.1124	8.78294e-06	0.02525	-0.0111	0.2168	0.009	FALSE	TRUE
CD28+ CD45RA+ CD8dim AC	Alzheimer's disease	rs1005513	C	T	C	T	0.12	2.45002e-06	0.02541	-0.0347	0.000110999	0.009	FALSE	TRUE
CD28+ CD45RA+ CD8dim AC	Alzheimer's disease	rs10451363	C	T	C	T	1.742	8.43393e-06	0.3906	0.0276	0.8696	0.1682	FALSE	TRUE
CD28+ CD45RA+ CD8dim AC	Alzheimer's disease	rs10875036	C	T	C	T	-0.1218	2.73602e-06	0.02593	0.0021	0.8269	0.0098	FALSE	TRUE
CD28+ CD45RA+ CD8dim AC	Alzheimer's disease	rs112637846	A	C	A	C	3.334	2.75797e-08	0.5986	-0.0015	0.9558	0.0266	FALSE	TRUE
CD28+ CD45RA+ CD8dim AC	Alzheimer's disease	rs113098887	A	C	A	C	3.627	4.38299e-06	0.7884	0.0442	0.1835	0.0332	FALSE	TRUE
CD28+ CD45RA+ CD8dim AC	Alzheimer's disease	rs115376296	C	T	C	T	0.9633	5.29798e-06	0.2113	0.032	0.4605	0.0434	FALSE	TRUE
CD28+ CD45RA+ CD8dim AC	Alzheimer's disease	rs11579717	A	G	A	G	1.176	1.76889e-12	0.1662	0.0488	0.0161102	0.0203	FALSE	TRUE
CD28+ CD45RA+ CD8dim AC	Alzheimer's disease	rs116794175	C	T	C	T	1.018	3.23303e-09	0.1715	0.041	0.573099	0.0728	FALSE	TRUE
CD28+ CD45RA+ CD8dim AC	Alzheimer's disease	rs117403703	C	T	C	T	3.552	6.22702e-06	0.785	-0.0092	0.7894	0.0346	FALSE	TRUE
CD28+ CD45RA+ CD8dim AC	Alzheimer's disease	rs12712610	G	A	G	A	0.1631	2.82293e-11	0.02442	0.0079	0.4662	0.0108	FALSE	TRUE
CD28+ CD45RA+ CD8dim AC	Alzheimer's disease	rs12907798	T	C	T	C	-0.1409	3.78704e-06	0.03043	-0.01	0.3749	0.0112	FALSE	TRUE
CD28+ CD45RA+ CD8dim AC	Alzheimer's disease	rs13243221	G	T	G	T	3.637	3.68299e-06	0.7844	-0.0037	0.9043	0.0306	FALSE	TRUE
CD28+ CD45RA+ CD8dim AC	Alzheimer's disease	rs1341624	T	C	T	C	0.3324	4.11604e-06	0.07207	0.009	0.6124	0.0177	FALSE	TRUE
CD28+ CD45RA+ CD8dim AC	Alzheimer's disease	rs138298107	T	C	T	C	0.9379	3.23802e-06	0.2012	0.0095	0.788099	0.0355	FALSE	TRUE
CD28+ CD45RA+ CD8dim AC	Alzheimer's disease	rs138960714	C	A	C	A	2.077	4.12696e-06	0.4504	-0.0348	0.4023	0.0416	FALSE	TRUE
CD28+ CD45RA+ CD8dim AC	Alzheimer's disease	rs139618773	A	G	A	G	1.428	3.093e-06	0.3057	-0.0016	0.9584	0.0303	FALSE	TRUE
CD28+ CD45RA+ CD8dim AC	Alzheimer's disease	rs140816141	A	G	A	G	2.219	9.57194e-06	0.5005	0.0954	0.0357899	0.0454	FALSE	TRUE
CD28+ CD45RA+ CD8dim AC	Alzheimer's disease	rs141049772	C	T	C	T	2.128	9.73195e-06	0.4805	0.019	0.592	0.0354	FALSE	TRUE
CD28+ CD45RA+ CD8dim AC	Alzheimer's disease	rs144591335	G	A	G	A	3.931	9.84306e-06	0.8878	-0.0605	0.1736	0.0444	FALSE	TRUE
CD28+ CD45RA+ CD8dim AC	Alzheimer's disease	rs145827119	T	C	T	C	5.042	2.45997e-06	1.068	-0.0628	0.1645	0.0452	FALSE	TRUE
CD28+ CD45RA+ CD8dim AC	Alzheimer's disease	rs146985291	G	A	G	A	6.548	5.15905e-06	1.434	0.0172	0.6928	0.0436	FALSE	TRUE
CD28+ CD45RA+ CD8dim AC	Alzheimer's disease	rs149948027	T	C	T	C	3.192	5.90201e-06	0.7035	0.0885	0.0477903	0.0447	FALSE	TRUE
CD28+ CD45RA+ CD8dim AC	Alzheimer's disease	rs182236332	G	A	G	A	4.616	7.68493e-06	1.03	-0.0514	0.2804	0.0476	FALSE	TRUE
CD28+ CD45RA+ CD8dim AC	Alzheimer's disease	rs184082746	C	T	C	T	3.826	2.95298e-06	0.8172	-0.0275	0.5995	0.0523	FALSE	TRUE
CD28+ CD45RA+ CD8dim AC	Alzheimer's disease	rs1948650	G	A	G	A	-0.1189	4.42904e-06	0.02586	-0.0119	0.1947	0.0092	FALSE	TRUE
CD28+ CD45RA+ CD8dim AC	Alzheimer's disease	rs35471013	T	C	T	C	-0.239	3.36302e-06	0.05133	-0.0374	0.02398	0.0165	FALSE	TRUE
CD28+ CD45RA+ CD8dim AC	Alzheimer's disease	rs35884179	A	G	A	G	-0.3532	8.57591e-07	0.07162	0.0083	0.723801	0.0236	FALSE	TRUE
CD28+ CD45RA+ CD8dim AC	Alzheimer's disease	rs468979	C	T	C	T	0.1195	4.018e-06	0.02587	-0.0067	0.4271	0.0084	FALSE	TRUE
CD28+ CD45RA+ CD8dim AC	Alzheimer's disease	rs541367304	A	G	A	G	2.141	1.10306e-20	0.2281	0.0454	0.1875	0.0344	FALSE	TRUE
CD28+ CD45RA+ CD8dim AC	Alzheimer's disease	rs56112048	A	C	A	C	-0.1157	1.085e-06	0.02368	0.018	0.06047	0.0096	FALSE	TRUE
CD28+ CD45RA+ CD8dim AC	Alzheimer's disease	rs574807	A	G	A	G	-0.1044	5.47394e-06	0.02294	0.0058	0.4761	0.0081	FALSE	TRUE
CD28+ CD45RA+ CD8dim AC	Alzheimer's disease	rs61038907	A	C	A	C	0.1398	2.72101e-08	0.02509	-0.0208	0.0139901	0.0085	FALSE	TRUE
CD28+ CD45RA+ CD8dim AC	Alzheimer's disease	rs62229786	A	G	A	G	-0.3021	5.50503e-06	0.06636	-0.0218	0.3148	0.0217	FALSE	TRUE
CD28+ CD45RA+ CD8dim AC	Alzheimer's disease	rs7096922	G	A	G	A	1.253	4.39198e-06	0.2725	0.0035	0.9187	0.0341	FALSE	TRUE
CD28+ CD45RA+ CD8dim AC	Alzheimer's disease	rs72763382	G	A	G	A	-0.4449	8.25905e-06	0.09964	-0.0167	0.5149	0.0256	FALSE	TRUE
CD28+ CD45RA+ CD8dim AC	Alzheimer's disease	rs73193728	C	T	C	T	0.2069	9.19708e-06	0.04657	-0.0212	0.2073	0.0168	FALSE	TRUE
CD28+ CD45RA+ CD8dim AC	Alzheimer's disease	rs74577787	T	C	T	C	3.341	2.58399e-08	0.5986	0.0021	0.9554	0.0367	FALSE	TRUE
CD28+ CD45RA+ CD8dim AC	Alzheimer's disease	rs7530076	A	G	A	G	-0.3874	1.06101e-07	0.07271	0.0372	0.1262	0.0243	FALSE	TRUE
CD28+ CD45RA+ CD8dim AC	Alzheimer's disease	rs7557121	T	C	T	C	-0.1308	5.07306e-07	0.02599	-0.0077	0.3772	0.0088	FALSE	TRUE
CD28+ CD45RA+ CD8dim AC	Alzheimer's disease	rs76313555	T	C	T	C	0.5934	8.24404e-07	0.1201	0.0234	0.3681	0.026	FALSE	TRUE
CD28+ CD45RA+ CD8dim AC	Alzheimer's disease	rs77935824	G	A	G	A	3.776	8.48907e-06	0.8468	0.0254	0.5494	0.0424	FALSE	TRUE
CD28+ CD45RA+ CD8dim AC	Alzheimer's disease	rs78905646	A	G	A	G	0.3781	2.323e-07	0.07295	0.0228	0.3986	0.027	FALSE	TRUE
CD28+ CD45RA+ CD8dim AC	Alzheimer's disease	rs79827501	T	G	T	G	-0.2254	1.508e-07	0.04283	-0.0594	0.00620197	0.0217	FALSE	TRUE
CD28+ CD45RA+ CD8dim AC	Alzheimer's disease	rs80194890	G	T	G	T	4.583	9.5971e-06	1.034	0.0628	0.1037	0.0386	FALSE	TRUE
CD24 on IgD+ CD38br	Alzheimer's disease	rs10056811	A	G	A	G	-0.1322	1.61801e-06	0.02752	0.0055	0.5179	0.0085	FALSE	TRUE
CD24 on IgD+ CD38br	Alzheimer's disease	rs114151424	A	G	A	G	1.159	1.39801e-07	0.2197	0.0429	0.0898194	0.0253	FALSE	TRUE
CD24 on IgD+ CD38br	Alzheimer's disease	rs116032501	C	A	C	A	-0.1879	5.41701e-06	0.04125	-0.0082	0.727699	0.0235	FALSE	TRUE
CD24 on IgD+ CD38br	Alzheimer's disease	rs117920360	T	C	T	C	0.1459	8.28095e-06	0.03267	0.0188	0.2565	0.0166	FALSE	TRUE
CD24 on IgD+ CD38br	Alzheimer's disease	rs146379662	T	C	T	C	0.5365	3.46897e-06	0.1154	-0.0073	0.7863	0.0269	FALSE	TRUE
CD24 on IgD+ CD38br	Alzheimer's disease	rs16923647	T	C	T	C	-0.164	1.78599e-06	0.03428	0.0098	0.4195	0.0121	FALSE	TRUE
CD24 on IgD+ CD38br	Alzheimer's disease	rs1799693	G	A	G	A	-0.2018	6.12097e-10	0.03253	-0.0262	0.0850394	0.0152	FALSE	TRUE
CD24 on IgD+ CD38br	Alzheimer's disease	rs181036992	C	T	C	T	-0.4375	1.59001e-06	0.091	-0.0166	0.5251	0.0261	FALSE	TRUE
CD24 on IgD+ CD38br	Alzheimer's disease	rs192325628	T	C	T	C	0.4876	7.703e-07	0.09848	-0.1027	0.00285397	0.0344	FALSE	TRUE
CD24 on IgD+ CD38br	Alzheimer's disease	rs35093039	A	G	A	G	-0.21	9.98803e-06	0.04748	0.0398	0.00176401	0.0127	FALSE	TRUE
CD24 on IgD+ CD38br	Alzheimer's disease	rs45609135	A	G	A	G	-0.1767	8.30807e-06	0.03959	-0.0085	0.619001	0.0171	FALSE	TRUE
CD24 on IgD+ CD38br	Alzheimer's disease	rs4765854	C	A	C	A	-0.2274	6.26498e-06	0.05027	0.0035	0.7848	0.013	FALSE	TRUE
CD24 on IgD+ CD38br	Alzheimer's disease	rs57680652	T	C	T	C	0.128	9.40892e-07	0.02606	0.0004	0.9704	0.0101	FALSE	TRUE
CD24 on IgD+ CD38br	Alzheimer's disease	rs59655785	G	A	G	A	0.1174	2.17601e-06	0.02474	-0.0032	0.7286	0.0092	FALSE	TRUE
CD24 on IgD+ CD38br	Alzheimer's disease	rs6666130	T	G	T	G	-0.2436	2.24999e-06	0.05141	0.0025	0.9121	0.0228	FALSE	TRUE
CD24 on IgD+ CD38br	Alzheimer's disease	rs75059545	C	A	C	A	0.1761	3.39102e-06	0.03786	-0.0207	0.0598301	0.011	FALSE	TRUE
CD24 on IgD+ CD38br	Alzheimer's disease	rs7781145	A	C	A	C	-0.1421	1.087e-06	0.0291	0.0092	0.3237	0.0094	FALSE	TRUE
CD24 on IgD+ CD38br	Alzheimer's disease	rs78405192	C	T	C	T	1.577	6.71506e-06	0.3497	0.0083	0.75	0.026	FALSE	TRUE
CD24 on IgD+ CD38br	Alzheimer's disease	rs9326867	G	T	G	T	0.1697	5.04301e-06	0.03713	-0.0089	0.4388	0.0115	FALSE	TRUE
CD24 on IgD+ CD38br	Alzheimer's disease	rs9398107	G	A	G	A	-0.4386	1.27997e-15	0.0546	0.0213	0.2222	0.0174	FALSE	TRUE
CD24 on IgD+ CD38br	Alzheimer's disease	rs9452529	T	C	T	C	-0.5098	2.09098e-06	0.1073	0.0111	0.421	0.0137	FALSE	TRUE
Activated & resting Treg % CD4 Treg	Alzheimer's disease	rs10059100	G	A	G	A	-0.1187	5.098e-06	0.02599	0.0046	0.5831	0.0084	FALSE	TRUE
Activated & resting Treg % CD4 Treg	Alzheimer's disease	rs113435341	G	A	G	A	2.569	1.27909e-33	0.2103	0.0595	0.0724403	0.0331	FALSE	TRUE
Activated & resting Treg % CD4 Treg	Alzheimer's disease	rs11577174	T	C	T	C	-1.588	3.78303e-06	0.343	-0.0893	0.0095541	0.0345	FALSE	TRUE
Activated & resting Treg % CD4 Treg	Alzheimer's disease	rs11579717	A	G	A	G	1.815	5.32721e-24	0.1783	0.0488	0.0161102	0.0203	FALSE	TRUE
Activated & resting Treg % CD4 Treg	Alzheimer's disease	rs116794175	C	T	C	T	1.427	1.61696e-14	0.1851	0.041	0.573099	0.0728	FALSE	TRUE
Activated & resting Treg % CD4 Treg	Alzheimer's disease	rs11739607	C	T	C	T	0.3732	7.34007e-06	0.08311	-0.0163	0.2355	0.0137	FALSE	TRUE
Activated & resting Treg % CD4 Treg	Alzheimer's disease	rs12993274	C	A	C	A	-0.1538	6.47799e-06	0.03406	0.0041	0.7981	0.0159	FALSE	TRUE
Activated & resting Treg % CD4 Treg	Alzheimer's disease	rs17607399	T	C	T	C	0.218	2.76599e-08	0.03915	0.0026	0.8651	0.0152	FALSE	TRUE
Activated & resting Treg % CD4 Treg	Alzheimer's disease	rs187089343	C	A	C	A	0.8446	3.52598e-06	0.1818	-0.006	0.9293	0.0676	FALSE	TRUE
Activated & resting Treg % CD4 Treg	Alzheimer's disease	rs2148708	G	A	G	A	0.2102	6.14795e-06	0.04643	0.0214	0.1111	0.0134	FALSE	TRUE
Activated & resting Treg % CD4 Treg	Alzheimer's disease	rs34645541	A	C	A	C	0.6092	1.302e-06	0.1257	0.0602	0.03535	0.0286	FALSE	TRUE
Activated & resting Treg % CD4 Treg	Alzheimer's disease	rs413431	G	A	G	A	-0.2936	9.54333e-21	0.03123	-0.0198	0.1555	0.0139	FALSE	TRUE
Activated & resting Treg % CD4 Treg	Alzheimer's disease	rs4759006	A	G	A	G	-0.1503	7.03008e-06	0.0334	0.0005	0.9587	0.0098	FALSE	TRUE
Activated & resting Treg % CD4 Treg	Alzheimer's disease	rs562562	A	G	A	G	-0.1195	1.81001e-06	0.02499	0.0056	0.5144	0.0086	FALSE	TRUE
Activated & resting Treg % CD4 Treg	Alzheimer's disease	rs60220946	T	C	T	C	0.4221	2.94897e-07	0.08216	0.0493	0.1232	0.032	FALSE	TRUE
Activated & resting Treg % CD4 Treg	Alzheimer's disease	rs62322628	T	C	T	C	0.7983	6.55496e-06	0.1768	0.0029	0.9202	0.0287	FALSE	TRUE
Activated & resting Treg % CD4 Treg	Alzheimer's disease	rs6587385	C	T	C	T	0.125	1.48201e-06	0.02593	0.0029	0.735501	0.0085	FALSE	TRUE
Activated & resting Treg % CD4 Treg	Alzheimer's disease	rs6751481	C	T	C	T	0.2886	5.48656e-33	0.02387	0.0042	0.6083	0.0083	FALSE	TRUE
Activated & resting Treg % CD4 Treg	Alzheimer's disease	rs73579441	C	T	C	T	0.2151	5.71005e-06	0.04733	0.0272	0.1461	0.0187	FALSE	TRUE
Activated & resting Treg % CD4 Treg	Alzheimer's disease	rs75981740	G	A	G	A	-0.2161	2.91602e-06	0.04613	-0.0102	0.640301	0.0219	FALSE	TRUE
Activated & resting Treg % CD4 Treg	Alzheimer's disease	rs7825970	T	G	T	G	-0.1086	8.27694e-06	0.02433	0.0071	0.3992	0.0084	FALSE	TRUE
Activated & resting Treg % CD4 Treg	Alzheimer's disease	rs7893324	C	T	C	T	-0.1646	1.088e-06	0.03371	-0.0209	0.0725504	0.0116	FALSE	TRUE
Activated & resting Treg % CD4 Treg	Alzheimer's disease	rs79607503	A	G	A	G	0.5324	5.05895e-06	0.1165	-0.0087	0.791701	0.0331	FALSE	TRUE
Activated & resting Treg % CD4 Treg	Alzheimer's disease	rs9265947	C	T	C	T	-0.1408	6.58704e-06	0.0312	0.0088	0.3307	0.009	FALSE	TRUE
Secreting Treg % CD4 Treg	Alzheimer's disease	rs10059100	G	A	G	A	0.1188	4.48301e-06	0.02585	0.0046	0.5831	0.0084	FALSE	TRUE
Secreting Treg % CD4 Treg	Alzheimer's disease	rs113435341	G	A	G	A	-2.54	3.13834e-33	0.2093	0.0595	0.0724403	0.0331	FALSE	TRUE
Secreting Treg % CD4 Treg	Alzheimer's disease	rs11577174	T	C	T	C	1.612	2.38699e-06	0.3412	-0.0893	0.0095541	0.0345	FALSE	TRUE
Secreting Treg % CD4 Treg	Alzheimer's disease	rs11579717	A	G	A	G	-1.776	2.93022e-23	0.1774	0.0488	0.0161102	0.0203	FALSE	TRUE
Secreting Treg % CD4 Treg	Alzheimer's disease	rs116794175	C	T	C	T	-1.417	1.78115e-14	0.1841	0.041	0.573099	0.0728	FALSE	TRUE
Secreting Treg % CD4 Treg	Alzheimer's disease	rs11739607	C	T	C	T	-0.3801	4.42497e-06	0.08266	-0.0163	0.2355	0.0137	FALSE	TRUE
Secreting Treg % CD4 Treg	Alzheimer's disease	rs12744266	A	G	A	G	0.1243	1.547e-06	0.02583	-0.0013	0.8844	0.0087	FALSE	TRUE
Secreting Treg % CD4 Treg	Alzheimer's disease	rs12993274	C	A	C	A	0.1532	6.29695e-06	0.03388	0.0041	0.7981	0.0159	FALSE	TRUE
Secreting Treg % CD4 Treg	Alzheimer's disease	rs17607399	T	C	T	C	-0.2213	1.43599e-08	0.03894	0.0026	0.8651	0.0152	FALSE	TRUE
Secreting Treg % CD4 Treg	Alzheimer's disease	rs187089343	C	A	C	A	-0.8547	2.38699e-06	0.1809	-0.006	0.9293	0.0676	FALSE	TRUE
Secreting Treg % CD4 Treg	Alzheimer's disease	rs2148708	G	A	G	A	-0.2105	5.35895e-06	0.04618	0.0214	0.1111	0.0134	FALSE	TRUE
Secreting Treg % CD4 Treg	Alzheimer's disease	rs34645541	A	C	A	C	-0.6193	7.59994e-07	0.125	0.0602	0.03535	0.0286	FALSE	TRUE
Secreting Treg % CD4 Treg	Alzheimer's disease	rs413431	G	A	G	A	0.2955	3.30598e-21	0.03106	-0.0198	0.1555	0.0139	FALSE	TRUE
Secreting Treg % CD4 Treg	Alzheimer's disease	rs4759006	A	G	A	G	0.1495	7.07099e-06	0.03323	0.0005	0.9587	0.0098	FALSE	TRUE
Secreting Treg % CD4 Treg	Alzheimer's disease	rs562562	A	G	A	G	0.1197	1.54e-06	0.02486	0.0056	0.5144	0.0086	FALSE	TRUE
Secreting Treg % CD4 Treg	Alzheimer's disease	rs60220946	T	C	T	C	-0.4131	4.56499e-07	0.08175	0.0493	0.1232	0.032	FALSE	TRUE
Secreting Treg % CD4 Treg	Alzheimer's disease	rs62322628	T	C	T	C	-0.814	3.82798e-06	0.1759	0.0029	0.9202	0.0287	FALSE	TRUE
Secreting Treg % CD4 Treg	Alzheimer's disease	rs6751481	C	T	C	T	-0.2879	3.53021e-33	0.02374	0.0042	0.6083	0.0083	FALSE	TRUE
Secreting Treg % CD4 Treg	Alzheimer's disease	rs72966214	C	T	C	T	-0.2131	7.55301e-06	0.04753	0.038	0.102	0.0232	FALSE	TRUE
Secreting Treg % CD4 Treg	Alzheimer's disease	rs73579441	C	T	C	T	-0.2123	6.72698e-06	0.04708	0.0272	0.1461	0.0187	FALSE	TRUE
Secreting Treg % CD4 Treg	Alzheimer's disease	rs75981740	G	A	G	A	0.212	3.97796e-06	0.04589	-0.0102	0.640301	0.0219	FALSE	TRUE
Secreting Treg % CD4 Treg	Alzheimer's disease	rs7825970	T	G	T	G	0.1091	6.76893e-06	0.0242	0.0071	0.3992	0.0084	FALSE	TRUE
Secreting Treg % CD4 Treg	Alzheimer's disease	rs7893324	C	T	C	T	0.1629	1.24799e-06	0.03354	-0.0209	0.0725504	0.0116	FALSE	TRUE
Secreting Treg % CD4 Treg	Alzheimer's disease	rs79607503	A	G	A	G	-0.5285	5.28896e-06	0.1159	-0.0087	0.791701	0.0331	FALSE	TRUE
Secreting Treg % CD4 Treg	Alzheimer's disease	rs9265947	C	T	C	T	0.1387	8.15004e-06	0.03104	0.0088	0.3307	0.009	FALSE	TRUE
Resting Treg % CD4 Treg	Alzheimer's disease	rs10059100	G	A	G	A	-0.1194	1.357e-06	0.02467	0.0046	0.5831	0.0084	FALSE	TRUE
Resting Treg % CD4 Treg	Alzheimer's disease	rs112553628	G	A	G	A	0.2951	1.53801e-06	0.06128	-0.0223	0.1882	0.0169	FALSE	TRUE
Resting Treg % CD4 Treg	Alzheimer's disease	rs116850494	A	G	A	G	0.4351	5.16797e-06	0.09531	0.0084	0.744099	0.0256	FALSE	TRUE
Resting Treg % CD4 Treg	Alzheimer's disease	rs12133465	G	A	G	A	0.7179	6.33097e-10	0.1158	0.0077	0.7466	0.0239	FALSE	TRUE
Resting Treg % CD4 Treg	Alzheimer's disease	rs12722496	G	A	G	A	-0.2244	3.34603e-06	0.0482	-0.0274	0.0443496	0.0136	FALSE	TRUE
Resting Treg % CD4 Treg	Alzheimer's disease	rs12993274	C	A	C	A	-0.1476	5.05697e-06	0.0323	0.0041	0.7981	0.0159	FALSE	TRUE
Resting Treg % CD4 Treg	Alzheimer's disease	rs138915779	A	C	A	C	1.793	4.92833e-18	0.2061	0.0334	0.2641	0.0299	FALSE	TRUE
Resting Treg % CD4 Treg	Alzheimer's disease	rs138960714	C	A	C	A	2.013	9.71203e-06	0.4545	-0.0348	0.4023	0.0416	FALSE	TRUE
Resting Treg % CD4 Treg	Alzheimer's disease	rs139681117	T	C	T	C	0.2445	2.93697e-06	0.05221	0.0204	0.2535	0.0178	FALSE	TRUE
Resting Treg % CD4 Treg	Alzheimer's disease	rs146899923	C	T	C	T	0.7278	7.07995e-09	0.1254	0.0481	0.1254	0.0314	FALSE	TRUE
Resting Treg % CD4 Treg	Alzheimer's disease	rs147071297	A	G	A	G	1.292	6.13762e-13	0.1788	0.0643	0.0349502	0.0305	FALSE	TRUE
Resting Treg % CD4 Treg	Alzheimer's disease	rs150956189	C	T	C	T	2.691	2.36701e-06	0.5693	0.0346	0.2794	0.032	FALSE	TRUE
Resting Treg % CD4 Treg	Alzheimer's disease	rs17583875	A	G	A	G	2.714	3.21514e-40	0.2018	0.0141	0.6304	0.0293	FALSE	TRUE
Resting Treg % CD4 Treg	Alzheimer's disease	rs17607399	T	C	T	C	0.209	2.14102e-08	0.03723	0.0026	0.8651	0.0152	FALSE	TRUE
Resting Treg % CD4 Treg	Alzheimer's disease	rs187089343	C	A	C	A	0.9806	1.00399e-08	0.1707	-0.006	0.9293	0.0676	FALSE	TRUE
Resting Treg % CD4 Treg	Alzheimer's disease	rs192123974	T	C	T	C	1.588	5.99501e-07	0.3176	0.039	0.423	0.0486	FALSE	TRUE
Resting Treg % CD4 Treg	Alzheimer's disease	rs413431	G	A	G	A	-0.2777	1.46791e-20	0.02969	-0.0198	0.1555	0.0139	FALSE	TRUE
Resting Treg % CD4 Treg	Alzheimer's disease	rs60220946	T	C	T	C	0.4297	3.079e-08	0.07742	0.0493	0.1232	0.032	FALSE	TRUE
Resting Treg % CD4 Treg	Alzheimer's disease	rs61828007	G	A	G	A	0.3706	9.34695e-08	0.06927	-0.0021	0.9494	0.0328	FALSE	TRUE
Resting Treg % CD4 Treg	Alzheimer's disease	rs6751481	C	T	C	T	0.2946	3.39782e-38	0.02252	0.0042	0.6083	0.0083	FALSE	TRUE
Resting Treg % CD4 Treg	Alzheimer's disease	rs73124650	C	T	C	T	0.3448	1.91501e-06	0.07228	0.0579	0.1014	0.0354	FALSE	TRUE
Resting Treg % CD4 Treg	Alzheimer's disease	rs7530076	A	G	A	G	-0.463	5.95498e-10	0.07456	0.0372	0.1262	0.0243	FALSE	TRUE
Resting Treg % CD4 Treg	Alzheimer's disease	rs76109501	A	G	A	G	0.831	8.77506e-06	0.1867	0.0192	0.4657	0.0263	FALSE	TRUE
Resting Treg % CD4 Treg	Alzheimer's disease	rs76584473	A	G	A	G	0.2968	7.68794e-06	0.06625	-0.0063	0.786799	0.0232	FALSE	TRUE
Resting Treg % CD4 Treg	Alzheimer's disease	rs78144227	A	G	A	G	0.2555	7.66196e-06	0.05701	-0.0036	0.9325	0.0426	FALSE	TRUE
Resting Treg % CD4 Treg	Alzheimer's disease	rs79670457	T	C	T	C	0.2321	2.227e-06	0.04896	0.0571	0.0290898	0.0261	FALSE	TRUE
Resting Treg % CD4 Treg	Alzheimer's disease	rs9274712	T	C	T	C	-0.1758	6.79908e-07	0.03533	-0.0273	0.00298298	0.0092	FALSE	TRUE
Activated & secreting Treg %CD4 Treg	Alzheimer's disease	rs10059100	G	A	G	A	0.1214	6.51493e-07	0.02435	0.0046	0.5831	0.0084	FALSE	TRUE
Activated & secreting Treg %CD4 Treg	Alzheimer's disease	rs112455863	G	A	G	A	0.6921	5.90106e-06	0.1525	0.1002	0.0474504	0.0506	FALSE	TRUE
Activated & secreting Treg %CD4 Treg	Alzheimer's disease	rs112553628	G	A	G	A	-0.2867	2.31499e-06	0.0606	-0.0223	0.1882	0.0169	FALSE	TRUE
Activated & secreting Treg %CD4 Treg	Alzheimer's disease	rs112637846	A	C	A	C	-2.712	5.60906e-06	0.5963	-0.0015	0.9558	0.0266	FALSE	TRUE
Activated & secreting Treg %CD4 Treg	Alzheimer's disease	rs113000944	T	C	T	C	-0.2336	6.944e-07	0.04699	-0.0045	0.8503	0.0237	FALSE	TRUE
Activated & secreting Treg %CD4 Treg	Alzheimer's disease	rs113435341	G	A	G	A	-2.621	6.32995e-40	0.1957	0.0595	0.0724403	0.0331	FALSE	TRUE
Activated & secreting Treg %CD4 Treg	Alzheimer's disease	rs115669925	A	G	A	G	4.109	5.64794e-06	0.9038	0.036	0.2603	0.032	FALSE	TRUE
Activated & secreting Treg %CD4 Treg	Alzheimer's disease	rs11579717	A	G	A	G	-1.821	1.86896e-27	0.1663	0.0488	0.0161102	0.0203	FALSE	TRUE
Activated & secreting Treg %CD4 Treg	Alzheimer's disease	rs115907036	T	C	T	C	-0.4234	9.86302e-06	0.09565	-0.0331	0.2611	0.0295	FALSE	TRUE
Activated & secreting Treg %CD4 Treg	Alzheimer's disease	rs116850494	A	G	A	G	-0.4419	2.91998e-06	0.09434	0.0084	0.744099	0.0256	FALSE	TRUE
Activated & secreting Treg %CD4 Treg	Alzheimer's disease	rs11969660	T	C	T	C	-0.2112	7.66496e-06	0.04712	-0.0245	0.0543	0.0127	FALSE	TRUE
Activated & secreting Treg %CD4 Treg	Alzheimer's disease	rs12722496	G	A	G	A	0.215	6.33199e-06	0.04755	-0.0274	0.0443496	0.0136	FALSE	TRUE
Activated & secreting Treg %CD4 Treg	Alzheimer's disease	rs13000564	C	T	C	T	0.1141	4.61604e-06	0.02487	0.003	0.735099	0.0088	FALSE	TRUE
Activated & secreting Treg %CD4 Treg	Alzheimer's disease	rs138915779	A	C	A	C	-1.784	3.69828e-18	0.2042	0.0334	0.2641	0.0299	FALSE	TRUE
Activated & secreting Treg %CD4 Treg	Alzheimer's disease	rs138960714	C	A	C	A	-2.124	2.585e-06	0.451	-0.0348	0.4023	0.0416	FALSE	TRUE
Activated & secreting Treg %CD4 Treg	Alzheimer's disease	rs139681117	T	C	T	C	-0.2345	5.65497e-06	0.05158	0.0204	0.2535	0.0178	FALSE	TRUE
Activated & secreting Treg %CD4 Treg	Alzheimer's disease	rs145406940	A	G	A	G	1.967	3.51196e-06	0.4233	-0.0233	0.745	0.0717	FALSE	TRUE
Activated & secreting Treg %CD4 Treg	Alzheimer's disease	rs146899923	C	T	C	T	-0.7496	1.67799e-09	0.1241	0.0481	0.1254	0.0314	FALSE	TRUE
Activated & secreting Treg %CD4 Treg	Alzheimer's disease	rs150956189	C	T	C	T	-2.624	4.01597e-06	0.5683	0.0346	0.2794	0.032	FALSE	TRUE
Activated & secreting Treg %CD4 Treg	Alzheimer's disease	rs17607399	T	C	T	C	-0.2077	1.7e-08	0.03673	0.0026	0.8651	0.0152	FALSE	TRUE
Activated & secreting Treg %CD4 Treg	Alzheimer's disease	rs187089343	C	A	C	A	-0.9956	4.52397e-09	0.1693	-0.006	0.9293	0.0676	FALSE	TRUE
Activated & secreting Treg %CD4 Treg	Alzheimer's disease	rs189383	C	T	C	T	0.1316	8.08295e-06	0.02943	-0.0124	0.2957	0.0119	FALSE	TRUE
Activated & secreting Treg %CD4 Treg	Alzheimer's disease	rs191384725	G	A	G	A	-0.8475	6.35404e-06	0.1874	0.0362	0.2825	0.0337	FALSE	TRUE
Activated & secreting Treg %CD4 Treg	Alzheimer's disease	rs192123974	T	C	T	C	-1.546	9.19009e-07	0.3144	0.039	0.423	0.0486	FALSE	TRUE
Activated & secreting Treg %CD4 Treg	Alzheimer's disease	rs3917863	A	G	A	G	-0.4303	2.74303e-06	0.09161	-0.017	0.666201	0.0394	FALSE	TRUE
Activated & secreting Treg %CD4 Treg	Alzheimer's disease	rs413431	G	A	G	A	0.2748	1.16305e-20	0.0293	-0.0198	0.1555	0.0139	FALSE	TRUE
Activated & secreting Treg %CD4 Treg	Alzheimer's disease	rs60220946	T	C	T	C	-0.4053	1.367e-07	0.07676	0.0493	0.1232	0.032	FALSE	TRUE
Activated & secreting Treg %CD4 Treg	Alzheimer's disease	rs61828007	G	A	G	A	-0.356	2.12701e-07	0.06849	-0.0021	0.9494	0.0328	FALSE	TRUE
Activated & secreting Treg %CD4 Treg	Alzheimer's disease	rs6751481	C	T	C	T	-0.2903	6.28782e-38	0.02227	0.0042	0.6083	0.0083	FALSE	TRUE
Activated & secreting Treg %CD4 Treg	Alzheimer's disease	rs72651876	T	C	T	C	-0.1135	6.64401e-06	0.02516	-0.0066	0.5777	0.0118	FALSE	TRUE
Activated & secreting Treg %CD4 Treg	Alzheimer's disease	rs73579441	C	T	C	T	-0.1959	9.8159e-06	0.04424	0.0272	0.1461	0.0187	FALSE	TRUE
Activated & secreting Treg %CD4 Treg	Alzheimer's disease	rs7530076	A	G	A	G	0.4611	4.49904e-10	0.07373	0.0372	0.1262	0.0243	FALSE	TRUE
Activated & secreting Treg %CD4 Treg	Alzheimer's disease	rs76109501	A	G	A	G	-0.8373	6.33199e-06	0.1852	0.0192	0.4657	0.0263	FALSE	TRUE
Activated & secreting Treg %CD4 Treg	Alzheimer's disease	rs78181865	A	G	A	G	-2.709	5.50605e-06	0.5951	0.0337	0.2879	0.0317	FALSE	TRUE
Activated & secreting Treg %CD4 Treg	Alzheimer's disease	rs9274712	T	C	T	C	0.1731	5.80898e-07	0.03457	-0.0273	0.00298298	0.0092	FALSE	TRUE
CD39+ activated Treg AC	Alzheimer's disease	rs10059458	C	T	C	T	0.1184	8.51805e-06	0.02655	0.0008	0.923	0.0082	FALSE	TRUE
CD39+ activated Treg AC	Alzheimer's disease	rs10786199	A	G	A	G	-0.189	5.63248e-11	0.02875	0.012	0.1503	0.0083	FALSE	TRUE
CD39+ activated Treg AC	Alzheimer's disease	rs10882701	C	A	C	A	-0.3631	1.80094e-45	0.02528	0.0015	0.8649	0.0086	FALSE	TRUE
CD39+ activated Treg AC	Alzheimer's disease	rs11002579	A	G	A	G	-0.1316	1.46201e-06	0.02727	0.0021	0.8246	0.0096	FALSE	TRUE
CD39+ activated Treg AC	Alzheimer's disease	rs111806244	T	C	T	C	-0.3653	3.26302e-06	0.07836	0.0182	0.3007	0.0176	FALSE	TRUE
CD39+ activated Treg AC	Alzheimer's disease	rs11188757	C	A	C	A	-0.2494	3.05914e-15	0.03146	-0.0017	0.8454	0.0089	FALSE	TRUE
CD39+ activated Treg AC	Alzheimer's disease	rs11795139	T	C	T	C	0.1205	9.22593e-06	0.02712	-0.0088	0.3325	0.0091	FALSE	TRUE
CD39+ activated Treg AC	Alzheimer's disease	rs12648210	G	A	G	A	-0.5171	1.01801e-06	0.1056	-0.0011	0.949	0.0177	FALSE	TRUE
CD39+ activated Treg AC	Alzheimer's disease	rs12707040	A	G	A	G	0.1591	3.37404e-06	0.03418	-0.0088	0.3839	0.0101	FALSE	TRUE
CD39+ activated Treg AC	Alzheimer's disease	rs139577399	C	T	C	T	-0.3155	1.08101e-06	0.06457	-0.0577	0.1379	0.0389	FALSE	TRUE
CD39+ activated Treg AC	Alzheimer's disease	rs139917391	T	C	T	C	2.666	3.15697e-06	0.5711	-0.0614	0.1313	0.0407	FALSE	TRUE
CD39+ activated Treg AC	Alzheimer's disease	rs142422333	T	C	T	C	-0.2705	4.782e-06	0.05905	-0.0428	0.3183	0.0428	FALSE	TRUE
CD39+ activated Treg AC	Alzheimer's disease	rs202211780	G	A	G	A	0.4192	1.01906e-19	0.04585	-0.0133	0.2028	0.0104	FALSE	TRUE
CD39+ activated Treg AC	Alzheimer's disease	rs2251521	T	C	T	C	-0.197	4.27996e-06	0.04279	-0.0176	0.0854398	0.0102	FALSE	TRUE
CD39+ activated Treg AC	Alzheimer's disease	rs289708	G	A	G	A	0.1372	3.77303e-06	0.02962	-0.0047	0.6797	0.0113	FALSE	TRUE
CD39+ activated Treg AC	Alzheimer's disease	rs35163827	G	A	G	A	-0.3443	1.646e-06	0.07172	0.0279	0.3656	0.0309	FALSE	TRUE
CD39+ activated Treg AC	Alzheimer's disease	rs4321083	A	G	A	G	0.1497	2.12398e-06	0.03152	0.005	0.590999	0.0094	FALSE	TRUE
CD39+ activated Treg AC	Alzheimer's disease	rs4441121	G	A	G	A	0.125	3.85496e-06	0.02703	0.0073	0.4337	0.0094	FALSE	TRUE
CD39+ activated Treg AC	Alzheimer's disease	rs4811602	A	G	A	G	0.1348	2.651e-07	0.02614	0.0047	0.5711	0.0082	FALSE	TRUE
CD39+ activated Treg AC	Alzheimer's disease	rs56197234	A	G	A	G	0.5601	2.536e-06	0.1188	0.0026	0.8902	0.0189	FALSE	TRUE
CD39+ activated Treg AC	Alzheimer's disease	rs618250	T	C	T	C	0.3109	2.51299e-07	0.06017	-0.0452	0.0728098	0.0252	FALSE	TRUE
CD39+ activated Treg AC	Alzheimer's disease	rs7088584	T	G	T	G	0.8768	1e-200	0.02116	0.0211	0.00942606	0.0081	FALSE	TRUE
CD39+ activated Treg AC	Alzheimer's disease	rs7267949	T	C	T	C	-0.7453	9.64206e-06	0.1682	0.0014	0.9725	0.0412	FALSE	TRUE
CD39+ activated Treg AC	Alzheimer's disease	rs72809762	T	C	T	C	0.3373	4.74351e-11	0.0511	0.0054	0.7979	0.021	FALSE	TRUE
CD39+ activated Treg AC	Alzheimer's disease	rs7432284	C	A	C	A	0.2441	1.196e-06	0.05017	0.0212	0.2128	0.017	FALSE	TRUE
CD39+ activated Treg AC	Alzheimer's disease	rs78027772	A	G	A	G	0.2212	2.29398e-06	0.04672	0.0034	0.7927	0.013	FALSE	TRUE
CD39+ activated Treg AC	Alzheimer's disease	rs8076447	A	G	A	G	0.1337	5.08604e-06	0.02928	0.0026	0.8168	0.011	FALSE	TRUE
FSC-A on NK	Alzheimer's disease	rs1006368	T	C	T	C	0.389	5.07809e-22	0.04003	-0.0065	0.611499	0.0127	FALSE	TRUE
FSC-A on NK	Alzheimer's disease	rs10919543	G	A	G	A	-0.1509	3.03403e-08	0.02717	0.0159	0.0681695	0.0087	FALSE	TRUE
FSC-A on NK	Alzheimer's disease	rs111460281	A	G	A	G	0.2794	5.53503e-06	0.06138	0.0243	0.2822	0.0226	FALSE	TRUE
FSC-A on NK	Alzheimer's disease	rs117893932	G	A	G	A	0.2818	4.83704e-06	0.06153	-0.0098	0.7224	0.0276	FALSE	TRUE
FSC-A on NK	Alzheimer's disease	rs12425743	G	A	G	A	0.8813	1.43199e-06	0.1825	0.012	0.4176	0.0148	FALSE	TRUE
FSC-A on NK	Alzheimer's disease	rs12542554	T	C	T	C	0.2057	2.40298e-06	0.04354	-0.0043	0.757	0.014	FALSE	TRUE
FSC-A on NK	Alzheimer's disease	rs145419574	T	C	T	C	1.098	4.30002e-06	0.2386	-0.0353	0.3025	0.0343	FALSE	TRUE
FSC-A on NK	Alzheimer's disease	rs146765347	T	C	T	C	-0.286	5.01095e-06	0.06255	-0.0219	0.35	0.0234	FALSE	TRUE
FSC-A on NK	Alzheimer's disease	rs16970975	A	G	A	G	-0.1698	2.44698e-06	0.03597	-0.0105	0.3215	0.0106	FALSE	TRUE
FSC-A on NK	Alzheimer's disease	rs1735091	T	C	T	C	-0.1744	4.49697e-06	0.03795	-0.0144	0.2624	0.0129	FALSE	TRUE
FSC-A on NK	Alzheimer's disease	rs2774933	A	G	A	G	0.1363	1.29799e-06	0.0281	-0.0234	0.00475401	0.0083	FALSE	TRUE
FSC-A on NK	Alzheimer's disease	rs34700818	T	C	T	C	0.133	9.93802e-06	0.03006	0.0097	0.2859	0.0091	FALSE	TRUE
FSC-A on NK	Alzheimer's disease	rs5768144	G	A	G	A	-0.1937	5.04905e-06	0.04237	-0.0086	0.5203	0.0134	FALSE	TRUE
FSC-A on NK	Alzheimer's disease	rs73112545	T	C	T	C	-0.139	2.24202e-06	0.02933	-0.0042	0.6925	0.0105	FALSE	TRUE
FSC-A on NK	Alzheimer's disease	rs78273995	G	A	G	A	0.1351	7.99908e-06	0.0302	-0.0206	0.0388803	0.01	FALSE	TRUE
FSC-A on NK	Alzheimer's disease	rs9912354	T	C	T	C	0.1606	2.34498e-09	0.02681	0.0014	0.8634	0.0083	FALSE	TRUE
SSC-A on NKT	Alzheimer's disease	rs1006368	T	C	T	C	0.2024	6.82197e-07	0.04066	-0.0065	0.611499	0.0127	FALSE	TRUE
SSC-A on NKT	Alzheimer's disease	rs10422871	T	C	T	C	-0.2765	3.60296e-09	0.04672	0.0213	0.1883	0.0162	FALSE	TRUE
SSC-A on NKT	Alzheimer's disease	rs10749775	A	C	A	C	0.1882	1.80401e-06	0.03934	0.0028	0.8207	0.0123	FALSE	TRUE
SSC-A on NKT	Alzheimer's disease	rs10765790	C	T	C	T	0.1554	1.54999e-08	0.02741	0.0038	0.643899	0.0082	FALSE	TRUE
SSC-A on NKT	Alzheimer's disease	rs11644532	A	G	A	G	0.2024	5.94402e-06	0.04461	-0.0471	0.00657703	0.0173	FALSE	TRUE
SSC-A on NKT	Alzheimer's disease	rs118042158	C	T	C	T	0.867	8.95509e-06	0.1949	0.0059	0.8657	0.0352	FALSE	TRUE
SSC-A on NKT	Alzheimer's disease	rs12716653	C	T	C	T	-0.1377	1.199e-06	0.02831	-0.0065	0.4374	0.0084	FALSE	TRUE
SSC-A on NKT	Alzheimer's disease	rs138822248	A	G	A	G	-0.5658	9.58208e-06	0.1276	0.0021	0.9624	0.0451	FALSE	TRUE
SSC-A on NKT	Alzheimer's disease	rs2109396	A	C	A	C	-0.1485	2.25699e-06	0.03134	-0.0007	0.9351	0.009	FALSE	TRUE
SSC-A on NKT	Alzheimer's disease	rs2198787	C	A	C	A	-0.2554	1.327e-06	0.05271	0.0154	0.5133	0.0236	FALSE	TRUE
SSC-A on NKT	Alzheimer's disease	rs276951	T	C	T	C	-0.148	7.54293e-07	0.02986	-0.0059	0.5831	0.0108	FALSE	TRUE
SSC-A on NKT	Alzheimer's disease	rs35060274	G	T	G	T	0.159	2.68602e-06	0.03382	0.0053	0.5818	0.0096	FALSE	TRUE
SSC-A on NKT	Alzheimer's disease	rs4707956	A	C	A	C	0.1305	9.27406e-06	0.02938	0.019	0.0354699	0.009	FALSE	TRUE
SSC-A on NKT	Alzheimer's disease	rs55657662	A	C	A	C	0.135	9.26403e-06	0.03039	0.0043	0.6458	0.0094	FALSE	TRUE
SSC-A on NKT	Alzheimer's disease	rs6783507	C	T	C	T	-0.245	9.99609e-06	0.05538	0.0023	0.9058	0.0192	FALSE	TRUE
SSC-A on NKT	Alzheimer's disease	rs6918518	C	A	C	A	0.1324	1.735e-06	0.02764	0.0167	0.04181	0.0082	FALSE	TRUE
SSC-A on NKT	Alzheimer's disease	rs7183698	C	A	C	A	0.1252	7.69609e-06	0.02793	-0.0324	8.30004e-05	0.0082	FALSE	TRUE
SSC-A on NKT	Alzheimer's disease	rs78201778	A	G	A	G	2.293	7.25805e-06	0.5103	-0.0167	0.5818	0.0303	FALSE	TRUE
SSC-A on NKT	Alzheimer's disease	rs79523120	C	T	C	T	-2.525	1.133e-06	0.5177	-0.0049	0.8817	0.0329	FALSE	TRUE
SSC-A on NK	Alzheimer's disease	rs1006368	T	C	T	C	0.4144	3.61327e-24	0.04052	-0.0065	0.611499	0.0127	FALSE	TRUE
SSC-A on NK	Alzheimer's disease	rs10512469	T	C	T	C	-0.1684	4.30695e-06	0.03658	-0.0125	0.2365	0.0105	FALSE	TRUE
SSC-A on NK	Alzheimer's disease	rs11081793	G	A	G	A	-0.3945	2.56898e-06	0.08374	-0.0112	0.6916	0.0282	FALSE	TRUE
SSC-A on NK	Alzheimer's disease	rs11703193	A	G	A	G	-0.1793	1.56801e-06	0.03727	0.0161	0.1433	0.011	FALSE	TRUE
SSC-A on NK	Alzheimer's disease	rs12594783	C	T	C	T	-0.1395	5.41602e-06	0.03061	-0.0068	0.4748	0.0095	FALSE	TRUE
SSC-A on NK	Alzheimer's disease	rs147596499	G	A	G	A	0.4951	6.78297e-06	0.1098	-0.0494	0.2523	0.0432	FALSE	TRUE
SSC-A on NK	Alzheimer's disease	rs17606146	A	G	A	G	-0.2168	6.36708e-06	0.04794	-0.0163	0.4786	0.023	FALSE	TRUE
SSC-A on NK	Alzheimer's disease	rs188107682	A	G	A	G	-0.4965	5.74196e-06	0.1093	-0.0222	0.626599	0.0455	FALSE	TRUE
SSC-A on NK	Alzheimer's disease	rs2198787	C	A	C	A	-0.2652	6.54696e-07	0.05319	0.0154	0.5133	0.0236	FALSE	TRUE
SSC-A on NK	Alzheimer's disease	rs28691703	C	T	C	T	0.1706	2.87098e-06	0.03639	0.0095	0.3716	0.0107	FALSE	TRUE
SSC-A on NK	Alzheimer's disease	rs2869804	G	A	G	A	-0.1514	7.07995e-06	0.03364	-0.0069	0.4775	0.0097	FALSE	TRUE
SSC-A on NK	Alzheimer's disease	rs2915158	G	A	G	A	0.7087	6.93202e-06	0.1574	-0.0178	0.4038	0.0213	FALSE	TRUE
SSC-A on NK	Alzheimer's disease	rs35150190	T	G	T	G	-0.1472	6.00095e-06	0.03246	0.0044	0.6817	0.0107	FALSE	TRUE
SSC-A on NK	Alzheimer's disease	rs6850820	A	G	A	G	-0.1642	4.48198e-06	0.03573	0.0078	0.4198	0.0096	FALSE	TRUE
SSC-A on NK	Alzheimer's disease	rs6863338	T	C	T	C	0.2553	3.84804e-07	0.05018	0.0248	0.0505196	0.0127	FALSE	TRUE
SSC-A on NK	Alzheimer's disease	rs72901909	G	T	G	T	-0.2893	5.23396e-07	0.05753	0.0307	0.2403	0.0262	FALSE	TRUE
SSC-A on NK	Alzheimer's disease	rs74856421	T	C	T	C	0.22	7.787e-06	0.04913	-0.0021	0.8955	0.016	FALSE	TRUE
SSC-A on NK	Alzheimer's disease	rs75215140	G	A	G	A	-0.1632	9.04107e-06	0.0367	-0.0084	0.4407	0.0109	FALSE	TRUE
SSC-A on NK	Alzheimer's disease	rs7575742	G	A	G	A	0.1383	7.57199e-07	0.02791	-0.0266	0.001834	0.0085	FALSE	TRUE
SSC-A on NK	Alzheimer's disease	rs767896	T	C	T	C	0.1637	1.305e-06	0.03376	0.0058	0.5036	0.0087	FALSE	TRUE
SSC-A on NK	Alzheimer's disease	rs77154024	C	T	C	T	1.113	4.42303e-06	0.242	-0.0103	0.716401	0.0283	FALSE	TRUE
SSC-A on NK	Alzheimer's disease	rs79025422	A	G	A	G	0.5466	2.063e-06	0.1149	0.0049	0.8149	0.0207	FALSE	TRUE
SSC-A on NK	Alzheimer's disease	rs873220	A	G	A	G	-0.1277	9.56709e-06	0.02879	-0.0065	0.4473	0.0085	FALSE	TRUE
SSC-A on NK	Alzheimer's disease	rs9912354	T	C	T	C	0.1471	6.80205e-08	0.02719	0.0014	0.8634	0.0083	FALSE	TRUE
CD45RA- CD28- CD8br AC	Alzheimer's disease	rs1007033	T	C	T	C	37.39	5.58895e-08	6.868	-0.01	0.5771	0.0179	FALSE	TRUE
CD45RA- CD28- CD8br AC	Alzheimer's disease	rs10759064	G	A	G	A	-13.2	3.84397e-07	2.596	-0.012	0.1476	0.0083	FALSE	TRUE
CD45RA- CD28- CD8br AC	Alzheimer's disease	rs111417549	T	C	T	C	303.3	1.95398e-08	53.88	-0.0005	0.9867	0.029	FALSE	TRUE
CD45RA- CD28- CD8br AC	Alzheimer's disease	rs111456999	A	G	A	G	56.51	5.25799e-06	12.39	0.0316	0.2338	0.0265	FALSE	TRUE
CD45RA- CD28- CD8br AC	Alzheimer's disease	rs11160382	T	C	T	C	18.54	1.48399e-06	3.845	-0.0069	0.5679	0.0121	FALSE	TRUE
CD45RA- CD28- CD8br AC	Alzheimer's disease	rs111731860	T	C	T	C	36.01	4.51305e-06	7.839	-0.0319	0.5196	0.0495	FALSE	TRUE
CD45RA- CD28- CD8br AC	Alzheimer's disease	rs111953852	G	A	G	A	137.6	1.821e-08	24.38	0.0573	0.0537403	0.0297	FALSE	TRUE
CD45RA- CD28- CD8br AC	Alzheimer's disease	rs111978771	C	T	C	T	123.8	3.21403e-10	19.64	0.0075	0.8359	0.0363	FALSE	TRUE
CD45RA- CD28- CD8br AC	Alzheimer's disease	rs111981818	G	A	G	A	133.9	5.40505e-08	24.58	-0.0162	0.7027	0.0424	FALSE	TRUE
CD45RA- CD28- CD8br AC	Alzheimer's disease	rs112028149	T	C	T	C	105.2	1.69699e-06	21.94	-0.0689	0.0640501	0.0372	FALSE	TRUE
CD45RA- CD28- CD8br AC	Alzheimer's disease	rs11232730	A	C	A	C	40.36	2.20399e-07	7.773	-0.0063	0.6276	0.0129	FALSE	TRUE
CD45RA- CD28- CD8br AC	Alzheimer's disease	rs112545773	A	G	A	G	278.7	9.84102e-06	62.95	-0.0219	0.4565	0.0293	FALSE	TRUE
CD45RA- CD28- CD8br AC	Alzheimer's disease	rs112568609	T	C	T	C	87.63	9.60196e-09	15.24	-0.0034	0.9119	0.0305	FALSE	TRUE
CD45RA- CD28- CD8br AC	Alzheimer's disease	rs112785730	A	G	A	G	115.7	2.319e-06	24.44	0.1277	0.000196902	0.0343	FALSE	TRUE
CD45RA- CD28- CD8br AC	Alzheimer's disease	rs112857714	T	C	T	C	286.9	2.84302e-10	45.35	-0.0689	0.1393	0.0466	FALSE	TRUE
CD45RA- CD28- CD8br AC	Alzheimer's disease	rs113432575	T	C	T	C	345.8	1.48201e-09	57.03	0.0318	0.4486	0.042	FALSE	TRUE
CD45RA- CD28- CD8br AC	Alzheimer's disease	rs113447030	A	G	A	G	68.16	7.82492e-06	15.23	-0.0017	0.9308	0.0199	FALSE	TRUE
CD45RA- CD28- CD8br AC	Alzheimer's disease	rs113759128	T	C	T	C	75.56	2.63202e-06	16.06	0.0811	0.0906797	0.0479	FALSE	TRUE
CD45RA- CD28- CD8br AC	Alzheimer's disease	rs113819655	T	C	T	C	442.7	3.90301e-12	63.56	-0.0117	0.768399	0.0399	FALSE	TRUE
CD45RA- CD28- CD8br AC	Alzheimer's disease	rs114109475	A	G	A	G	76.96	6.26297e-07	15.41	-0.0075	0.8397	0.0372	FALSE	TRUE
CD45RA- CD28- CD8br AC	Alzheimer's disease	rs114128029	T	C	T	C	116.9	7.83502e-06	26.12	0.0081	0.832	0.0384	FALSE	TRUE
CD45RA- CD28- CD8br AC	Alzheimer's disease	rs114216104	T	C	T	C	591	1.16001e-09	96.85	0.018	0.592	0.0336	FALSE	TRUE
CD45RA- CD28- CD8br AC	Alzheimer's disease	rs114507999	A	G	A	G	176.7	1.91902e-09	29.35	0.0057	0.852	0.0307	FALSE	TRUE
CD45RA- CD28- CD8br AC	Alzheimer's disease	rs114619811	G	A	G	A	240.1	2.52e-06	50.93	-0.0458	0.2399	0.039	FALSE	TRUE
CD45RA- CD28- CD8br AC	Alzheimer's disease	rs114763811	A	C	A	C	979.6	2.51501e-09	163.9	0.079	0.1149	0.0501	FALSE	TRUE
CD45RA- CD28- CD8br AC	Alzheimer's disease	rs114801643	A	C	A	C	436	6.72295e-09	75.02	-0.0113	0.7007	0.0294	FALSE	TRUE
CD45RA- CD28- CD8br AC	Alzheimer's disease	rs114935210	G	A	G	A	161	6.53597e-06	35.65	-0.0031	0.9606	0.0624	FALSE	TRUE
CD45RA- CD28- CD8br AC	Alzheimer's disease	rs115379408	A	G	A	G	450.6	7.79202e-09	77.86	-0.0085	0.8287	0.0392	FALSE	TRUE
CD45RA- CD28- CD8br AC	Alzheimer's disease	rs115445664	G	A	G	A	349.4	7.86593e-07	70.62	-0.0538	0.1806	0.0402	FALSE	TRUE
CD45RA- CD28- CD8br AC	Alzheimer's disease	rs115486816	A	G	A	G	127.9	1.041e-06	26.15	0.0289	0.4532	0.0385	FALSE	TRUE
CD45RA- CD28- CD8br AC	Alzheimer's disease	rs115879183	G	A	G	A	281.9	5.10305e-10	45.23	-0.0659	0.1346	0.044	FALSE	TRUE
CD45RA- CD28- CD8br AC	Alzheimer's disease	rs115945428	A	G	A	G	61.26	9.909e-06	13.84	-0.0336	0.2478	0.0291	FALSE	TRUE
CD45RA- CD28- CD8br AC	Alzheimer's disease	rs115954619	A	G	A	G	213	7.23003e-09	36.73	0.0152	0.702399	0.0397	FALSE	TRUE
CD45RA- CD28- CD8br AC	Alzheimer's disease	rs116581718	C	T	C	T	384.3	4.1419e-11	58.05	0.0108	0.724399	0.0306	FALSE	TRUE
CD45RA- CD28- CD8br AC	Alzheimer's disease	rs116779558	G	T	G	T	248.4	1.44301e-07	47.12	0.0448	0.0907507	0.0265	FALSE	TRUE
CD45RA- CD28- CD8br AC	Alzheimer's disease	rs116807650	T	C	T	C	276.6	9.19899e-08	51.66	0.0117	0.767701	0.0396	FALSE	TRUE
CD45RA- CD28- CD8br AC	Alzheimer's disease	rs116848911	A	G	A	G	110	1.09099e-06	22.52	-0.0116	0.716199	0.0319	FALSE	TRUE
CD45RA- CD28- CD8br AC	Alzheimer's disease	rs116865617	C	A	C	A	120.1	2.16302e-06	25.31	0.0321	0.5479	0.0533	FALSE	TRUE
CD45RA- CD28- CD8br AC	Alzheimer's disease	rs116876186	C	T	C	T	647.9	6.57052e-11	98.9	-0.109	0.0109401	0.0428	FALSE	TRUE
CD45RA- CD28- CD8br AC	Alzheimer's disease	rs116959045	G	T	G	T	172.7	1.118e-09	28.26	0.049	0.221	0.04	FALSE	TRUE
CD45RA- CD28- CD8br AC	Alzheimer's disease	rs116960471	T	G	T	G	447.9	1.83899e-07	85.71	0.0343	0.5294	0.0546	FALSE	TRUE
CD45RA- CD28- CD8br AC	Alzheimer's disease	rs117006645	G	A	G	A	308.2	1.40501e-07	58.42	0.0311	0.718199	0.0862	FALSE	TRUE
CD45RA- CD28- CD8br AC	Alzheimer's disease	rs117036387	G	A	G	A	84.27	4.03701e-08	15.32	-0.0258	0.3775	0.0292	FALSE	TRUE
CD45RA- CD28- CD8br AC	Alzheimer's disease	rs117048727	T	C	T	C	368.8	2.585e-08	66.09	-0.0147	0.7668	0.0497	FALSE	TRUE
CD45RA- CD28- CD8br AC	Alzheimer's disease	rs11716645	G	A	G	A	159.7	2.41902e-09	26.69	0.0257	0.2974	0.0247	FALSE	TRUE
CD45RA- CD28- CD8br AC	Alzheimer's disease	rs117196114	A	G	A	G	201.5	4.10696e-10	32.14	0.0167	0.4231	0.0208	FALSE	TRUE
CD45RA- CD28- CD8br AC	Alzheimer's disease	rs117262195	T	C	T	C	270.5	1.5531e-11	39.98	0.0156	0.7861	0.0573	FALSE	TRUE
CD45RA- CD28- CD8br AC	Alzheimer's disease	rs117271894	A	G	A	G	192.8	1.62701e-08	34.06	0.0308	0.3331	0.0318	FALSE	TRUE
CD45RA- CD28- CD8br AC	Alzheimer's disease	rs117277690	G	A	G	A	356.8	6.19498e-08	65.76	0.0793	0.0197401	0.034	FALSE	TRUE
CD45RA- CD28- CD8br AC	Alzheimer's disease	rs117362948	A	G	A	G	262.2	8.24309e-06	58.71	0.0045	0.9256	0.0478	FALSE	TRUE
CD45RA- CD28- CD8br AC	Alzheimer's disease	rs117413806	C	T	C	T	364.8	3.57001e-08	66.04	0.0367	0.189	0.0279	FALSE	TRUE
CD45RA- CD28- CD8br AC	Alzheimer's disease	rs117428784	A	C	A	C	472.2	2.03095e-11	70.2	-0.045	0.2331	0.0378	FALSE	TRUE
CD45RA- CD28- CD8br AC	Alzheimer's disease	rs117431224	G	A	G	A	385.7	2.31201e-08	68.87	0.0326	0.418	0.0402	FALSE	TRUE
CD45RA- CD28- CD8br AC	Alzheimer's disease	rs117437702	G	A	G	A	46.12	2.613e-06	9.799	-0.0118	0.5837	0.0216	FALSE	TRUE
CD45RA- CD28- CD8br AC	Alzheimer's disease	rs117469911	A	C	A	C	132.8	1.238e-10	20.58	0.0544	0.1285	0.0358	FALSE	TRUE
CD45RA- CD28- CD8br AC	Alzheimer's disease	rs117475878	T	C	T	C	159.2	1.088e-07	29.91	0.0481	0.2113	0.0385	FALSE	TRUE
CD45RA- CD28- CD8br AC	Alzheimer's disease	rs117500319	A	G	A	G	230.6	2.09402e-06	48.53	0.0283	0.4125	0.0345	FALSE	TRUE
CD45RA- CD28- CD8br AC	Alzheimer's disease	rs117514047	C	A	C	A	462.3	2.70801e-08	82.97	-0.0401	0.2722	0.0366	FALSE	TRUE
CD45RA- CD28- CD8br AC	Alzheimer's disease	rs117739788	T	C	T	C	268.9	9.50889e-06	60.64	0.0664	0.2732	0.0606	FALSE	TRUE
CD45RA- CD28- CD8br AC	Alzheimer's disease	rs117785622	T	G	T	G	232.5	3.62602e-08	42.11	0.0039	0.9201	0.0392	FALSE	TRUE
CD45RA- CD28- CD8br AC	Alzheimer's disease	rs117845490	C	T	C	T	152.1	4.57804e-07	30.1	0.0147	0.5534	0.0249	FALSE	TRUE
CD45RA- CD28- CD8br AC	Alzheimer's disease	rs117863142	A	G	A	G	117.3	1.25401e-07	22.14	0.0536	0.0616496	0.0287	FALSE	TRUE
CD45RA- CD28- CD8br AC	Alzheimer's disease	rs117975109	T	G	T	G	308.9	4.82303e-07	61.24	0.0312	0.4851	0.0447	FALSE	TRUE
CD45RA- CD28- CD8br AC	Alzheimer's disease	rs118024980	C	T	C	T	50.48	3.37699e-06	10.85	0.0028	0.9413	0.0376	FALSE	TRUE
CD45RA- CD28- CD8br AC	Alzheimer's disease	rs118082680	C	T	C	T	217	4.33501e-07	42.86	-0.0106	0.769899	0.0363	FALSE	TRUE
CD45RA- CD28- CD8br AC	Alzheimer's disease	rs11899522	T	C	T	C	35.09	3.46003e-07	6.871	0.009	0.6952	0.0231	FALSE	TRUE
CD45RA- CD28- CD8br AC	Alzheimer's disease	rs12062472	T	C	T	C	172.5	4.90897e-06	37.71	0.0154	0.711101	0.0416	FALSE	TRUE
CD45RA- CD28- CD8br AC	Alzheimer's disease	rs12279408	T	C	T	C	259.3	4.69602e-07	51.36	-0.063	0.1494	0.0437	FALSE	TRUE
CD45RA- CD28- CD8br AC	Alzheimer's disease	rs12464465	A	G	A	G	189.7	4.08602e-08	34.49	0.0306	0.2964	0.0293	FALSE	TRUE
CD45RA- CD28- CD8br AC	Alzheimer's disease	rs12656604	A	C	A	C	101.8	1.19201e-07	19.19	-0.0099	0.716401	0.0273	FALSE	TRUE
CD45RA- CD28- CD8br AC	Alzheimer's disease	rs12882035	C	T	C	T	267	5.46198e-06	58.64	-0.0374	0.3075	0.0367	FALSE	TRUE
CD45RA- CD28- CD8br AC	Alzheimer's disease	rs130071	A	G	A	G	22.81	1.74401e-10	3.563	0.0064	0.4774	0.009	FALSE	TRUE
CD45RA- CD28- CD8br AC	Alzheimer's disease	rs137942933	T	G	T	G	304	5.05697e-08	55.65	0.0474	0.0910794	0.028	FALSE	TRUE
CD45RA- CD28- CD8br AC	Alzheimer's disease	rs137978465	A	G	A	G	641.1	2.23821e-21	67.08	-0.0129	0.6909	0.0325	FALSE	TRUE
CD45RA- CD28- CD8br AC	Alzheimer's disease	rs138010330	T	C	T	C	111	1.88899e-08	19.7	-0.0085	0.7901	0.032	FALSE	TRUE
CD45RA- CD28- CD8br AC	Alzheimer's disease	rs138324315	A	G	A	G	138.5	4.11396e-06	30.03	-0.0373	0.308	0.0366	FALSE	TRUE
CD45RA- CD28- CD8br AC	Alzheimer's disease	rs138480948	C	A	C	A	259.1	7.43498e-06	57.74	0.0667	0.1218	0.0431	FALSE	TRUE
CD45RA- CD28- CD8br AC	Alzheimer's disease	rs138615640	G	A	G	A	67.16	6.46398e-06	14.87	-0.0056	0.8814	0.0376	FALSE	TRUE
CD45RA- CD28- CD8br AC	Alzheimer's disease	rs138799468	T	C	T	C	791.9	1.17409e-15	98.43	0.0489	0.238	0.0414	FALSE	TRUE
CD45RA- CD28- CD8br AC	Alzheimer's disease	rs138829583	A	G	A	G	463.8	2.45697e-15	58.31	0.0174	0.716101	0.0478	FALSE	TRUE
CD45RA- CD28- CD8br AC	Alzheimer's disease	rs138962348	C	T	C	T	259.1	9.69706e-09	45.06	-0.0211	0.4967	0.031	FALSE	TRUE
CD45RA- CD28- CD8br AC	Alzheimer's disease	rs139243374	A	G	A	G	221.6	2.25902e-07	42.71	0.0335	0.1231	0.0217	FALSE	TRUE
CD45RA- CD28- CD8br AC	Alzheimer's disease	rs139436159	G	A	G	A	265.7	1.42498e-07	50.39	0.0423	0.5487	0.0706	FALSE	TRUE
CD45RA- CD28- CD8br AC	Alzheimer's disease	rs139457426	T	C	T	C	71.36	9.2406e-11	10.98	0.0172	0.565999	0.0299	FALSE	TRUE
CD45RA- CD28- CD8br AC	Alzheimer's disease	rs139513469	A	G	A	G	295.5	3.38298e-06	63.49	-0.0119	0.686099	0.0295	FALSE	TRUE
CD45RA- CD28- CD8br AC	Alzheimer's disease	rs139748481	A	G	A	G	72.32	6.93697e-06	16.06	-0.0294	0.621299	0.0596	FALSE	TRUE
CD45RA- CD28- CD8br AC	Alzheimer's disease	rs139772031	G	T	G	T	550.9	2.171e-08	98.17	0.0323	0.476	0.0453	FALSE	TRUE
CD45RA- CD28- CD8br AC	Alzheimer's disease	rs139889394	C	T	C	T	378	1.085e-06	77.39	0.0095	0.756901	0.0308	FALSE	TRUE
CD45RA- CD28- CD8br AC	Alzheimer's disease	rs140134394	C	T	C	T	151.8	9.75596e-10	24.76	-0.0222	0.5455	0.0367	FALSE	TRUE
CD45RA- CD28- CD8br AC	Alzheimer's disease	rs140280232	T	C	T	C	174.4	5.20499e-07	34.67	-0.0367	0.3179	0.0367	FALSE	TRUE
CD45RA- CD28- CD8br AC	Alzheimer's disease	rs140517857	A	G	A	G	179.1	9.26403e-07	36.43	-0.0212	0.569	0.0372	FALSE	TRUE
CD45RA- CD28- CD8br AC	Alzheimer's disease	rs140590797	G	A	G	A	240	5.223e-06	52.59	-0.0218	0.6005	0.0416	FALSE	TRUE
CD45RA- CD28- CD8br AC	Alzheimer's disease	rs140605634	T	C	T	C	161.7	1.32501e-09	26.59	0.0192	0.743	0.0586	FALSE	TRUE
CD45RA- CD28- CD8br AC	Alzheimer's disease	rs140677128	T	C	T	C	180.6	4.54004e-06	39.33	-0.0446	0.2119	0.0358	FALSE	TRUE
CD45RA- CD28- CD8br AC	Alzheimer's disease	rs140871773	G	A	G	A	201.6	1.94899e-06	42.28	-0.0576	0.1396	0.039	FALSE	TRUE
CD45RA- CD28- CD8br AC	Alzheimer's disease	rs140963286	T	C	T	C	760.9	4.67951e-14	100.5	0.0487	0.312	0.0481	FALSE	TRUE
CD45RA- CD28- CD8br AC	Alzheimer's disease	rs141018536	T	C	T	C	30.3	9.07403e-06	6.817	0.0007	0.9829	0.0325	FALSE	TRUE
CD45RA- CD28- CD8br AC	Alzheimer's disease	rs141057204	G	A	G	A	284.3	3.08099e-06	60.84	0.0045	0.9082	0.0394	FALSE	TRUE
CD45RA- CD28- CD8br AC	Alzheimer's disease	rs141112932	G	A	G	A	198.9	2.306e-06	42.02	-0.1033	0.122	0.0668	FALSE	TRUE
CD45RA- CD28- CD8br AC	Alzheimer's disease	rs141515499	T	C	T	C	197.4	5.36599e-07	39.3	-0.0501	0.2413	0.0427	FALSE	TRUE
CD45RA- CD28- CD8br AC	Alzheimer's disease	rs141926147	C	A	C	A	50.22	3.96004e-06	10.87	0.0262	0.4251	0.0329	FALSE	TRUE
CD45RA- CD28- CD8br AC	Alzheimer's disease	rs142115354	T	C	T	C	60.86	6.89398e-06	13.51	0.0261	0.3963	0.0308	FALSE	TRUE
CD45RA- CD28- CD8br AC	Alzheimer's disease	rs142419740	T	C	T	C	557.7	6.60906e-08	103	0.0342	0.4338	0.0437	FALSE	TRUE
CD45RA- CD28- CD8br AC	Alzheimer's disease	rs142470414	T	C	T	C	259.6	2.11198e-09	43.23	-0.025	0.4443	0.0326	FALSE	TRUE
CD45RA- CD28- CD8br AC	Alzheimer's disease	rs142522853	T	C	T	C	595.1	1.2249e-16	71.5	0.0036	0.8989	0.0287	FALSE	TRUE
CD45RA- CD28- CD8br AC	Alzheimer's disease	rs142611712	G	A	G	A	165.1	5.04998e-06	36.13	0.0667	0.0621699	0.0358	FALSE	TRUE
CD45RA- CD28- CD8br AC	Alzheimer's disease	rs142707561	A	G	A	G	84.4	2.87998e-06	18.01	-0.018	0.6647	0.0416	FALSE	TRUE
CD45RA- CD28- CD8br AC	Alzheimer's disease	rs142857708	C	T	C	T	269.9	3.32598e-06	57.94	0.017	0.6607	0.0388	FALSE	TRUE
CD45RA- CD28- CD8br AC	Alzheimer's disease	rs142911819	A	G	A	G	320.2	1.41501e-08	56.32	0.0339	0.4486	0.0447	FALSE	TRUE
CD45RA- CD28- CD8br AC	Alzheimer's disease	rs143044126	A	G	A	G	98.05	4.93094e-06	21.43	0.0651	0.2361	0.055	FALSE	TRUE
CD45RA- CD28- CD8br AC	Alzheimer's disease	rs143230107	G	A	G	A	115.3	3.34103e-06	24.76	0.0851	0.1254	0.0555	FALSE	TRUE
CD45RA- CD28- CD8br AC	Alzheimer's disease	rs143237141	A	G	A	G	32.04	6.54606e-06	7.097	0.0392	0.1306	0.0259	FALSE	TRUE
CD45RA- CD28- CD8br AC	Alzheimer's disease	rs143825022	T	C	T	C	251.2	1.149e-09	41.16	-0.0049	0.88	0.0323	FALSE	TRUE
CD45RA- CD28- CD8br AC	Alzheimer's disease	rs143930177	A	G	A	G	80	5.25799e-07	15.92	-0.0064	0.7701	0.0219	FALSE	TRUE
CD45RA- CD28- CD8br AC	Alzheimer's disease	rs143986791	A	G	A	G	30.71	7.78108e-06	6.857	-0.0295	0.484299	0.0422	FALSE	TRUE
CD45RA- CD28- CD8br AC	Alzheimer's disease	rs144431284	T	C	T	C	204.7	6.90605e-06	45.46	-0.0061	0.8758	0.0392	FALSE	TRUE
CD45RA- CD28- CD8br AC	Alzheimer's disease	rs144571871	G	A	G	A	725.9	6.75772e-13	100.6	-0.0017	0.9693	0.0445	FALSE	TRUE
CD45RA- CD28- CD8br AC	Alzheimer's disease	rs144599349	T	C	T	C	87.78	3.05703e-06	18.78	-0.017	0.667699	0.0397	FALSE	TRUE
CD45RA- CD28- CD8br AC	Alzheimer's disease	rs144711723	T	C	T	C	429	1.06001e-08	74.81	-0.036	0.3867	0.0416	FALSE	TRUE
CD45RA- CD28- CD8br AC	Alzheimer's disease	rs144920942	T	C	T	C	151.3	4.58005e-06	32.96	-0.0165	0.6039	0.0318	FALSE	TRUE
CD45RA- CD28- CD8br AC	Alzheimer's disease	rs145022527	T	G	T	G	162.1	2.08598e-06	34.1	-0.0236	0.3984	0.0279	FALSE	TRUE
CD45RA- CD28- CD8br AC	Alzheimer's disease	rs145137280	G	A	G	A	154.3	5.71597e-07	30.79	-0.011	0.7309	0.032	FALSE	TRUE
CD45RA- CD28- CD8br AC	Alzheimer's disease	rs145174666	A	G	A	G	52.78	4.04297e-06	11.43	0.0211	0.465799	0.029	FALSE	TRUE
CD45RA- CD28- CD8br AC	Alzheimer's disease	rs145224093	G	A	G	A	174.6	8.92606e-06	39.25	-0.0164	0.664401	0.0378	FALSE	TRUE
CD45RA- CD28- CD8br AC	Alzheimer's disease	rs145336406	T	C	T	C	148.2	4.22202e-09	25.16	-0.0152	0.6462	0.0331	FALSE	TRUE
CD45RA- CD28- CD8br AC	Alzheimer's disease	rs145483124	A	G	A	G	267.4	3.75198e-06	57.73	-0.0713	0.1301	0.0471	FALSE	TRUE
CD45RA- CD28- CD8br AC	Alzheimer's disease	rs145613913	A	G	A	G	281.9	2.80001e-09	47.31	0.0348	0.613999	0.0691	FALSE	TRUE
CD45RA- CD28- CD8br AC	Alzheimer's disease	rs145744161	T	C	T	C	32.56	6.12999e-07	6.516	0.0343	0.2777	0.0316	FALSE	TRUE
CD45RA- CD28- CD8br AC	Alzheimer's disease	rs145957749	A	C	A	C	116.2	6.56901e-06	25.75	0.007	0.8078	0.0288	FALSE	TRUE
CD45RA- CD28- CD8br AC	Alzheimer's disease	rs146127940	A	G	A	G	145.9	3.33503e-07	28.52	0.0447	0.1874	0.0339	FALSE	TRUE
CD45RA- CD28- CD8br AC	Alzheimer's disease	rs146914701	A	C	A	C	61.08	1.77301e-07	11.67	0.0764	0.0167101	0.0319	FALSE	TRUE
CD45RA- CD28- CD8br AC	Alzheimer's disease	rs146940094	T	G	T	G	285.3	1.66399e-09	47.21	-0.0804	0.0497496	0.041	FALSE	TRUE
CD45RA- CD28- CD8br AC	Alzheimer's disease	rs146986354	T	C	T	C	216.5	7.27093e-08	40.13	0.037	0.2142	0.0298	FALSE	TRUE
CD45RA- CD28- CD8br AC	Alzheimer's disease	rs147014864	T	G	T	G	164.9	2.46899e-07	31.9	0.0057	0.8914	0.0417	FALSE	TRUE
CD45RA- CD28- CD8br AC	Alzheimer's disease	rs147132955	T	C	T	C	573.2	8.367e-06	128.4	0.0108	0.8085	0.0448	FALSE	TRUE
CD45RA- CD28- CD8br AC	Alzheimer's disease	rs147205787	T	C	T	C	164.6	8.38398e-06	36.88	-0.0447	0.1781	0.0332	FALSE	TRUE
CD45RA- CD28- CD8br AC	Alzheimer's disease	rs147398419	T	G	T	G	51.71	2.48702e-06	10.96	-0.0037	0.9317	0.0427	FALSE	TRUE
CD45RA- CD28- CD8br AC	Alzheimer's disease	rs147427289	A	G	A	G	270.7	1.53501e-06	56.22	-0.0351	0.5231	0.055	FALSE	TRUE
CD45RA- CD28- CD8br AC	Alzheimer's disease	rs147706586	T	C	T	C	81.67	8.19993e-06	18.28	-0.0219	0.6006	0.0419	FALSE	TRUE
CD45RA- CD28- CD8br AC	Alzheimer's disease	rs148026776	A	C	A	C	174.2	2.10698e-06	36.66	0.0252	0.5233	0.0394	FALSE	TRUE
CD45RA- CD28- CD8br AC	Alzheimer's disease	rs148225159	T	C	T	C	113	1.75001e-06	23.6	-0.0249	0.516799	0.0385	FALSE	TRUE
CD45RA- CD28- CD8br AC	Alzheimer's disease	rs148242949	T	C	T	C	116.5	9.78408e-08	21.81	0.0334	0.5064	0.0503	FALSE	TRUE
CD45RA- CD28- CD8br AC	Alzheimer's disease	rs148658406	T	C	T	C	751.4	7.82168e-14	100.1	-0.0289	0.5523	0.0486	FALSE	TRUE
CD45RA- CD28- CD8br AC	Alzheimer's disease	rs148799115	C	A	C	A	55.39	2.869e-08	9.959	0.043	0.2581	0.038	FALSE	TRUE
CD45RA- CD28- CD8br AC	Alzheimer's disease	rs148889514	A	G	A	G	118.5	3.88401e-06	25.62	0.0065	0.838	0.0319	FALSE	TRUE
CD45RA- CD28- CD8br AC	Alzheimer's disease	rs149043871	A	G	A	G	230.8	1.93402e-06	48.41	-0.0067	0.8385	0.0328	FALSE	TRUE
CD45RA- CD28- CD8br AC	Alzheimer's disease	rs149532201	A	G	A	G	180	9.07298e-08	33.61	0.0032	0.9122	0.0287	FALSE	TRUE
CD45RA- CD28- CD8br AC	Alzheimer's disease	rs149716976	G	A	G	A	118.8	2.26621e-12	16.87	0.0073	0.8078	0.0302	FALSE	TRUE
CD45RA- CD28- CD8br AC	Alzheimer's disease	rs149737122	T	G	T	G	342.5	1.98098e-06	71.9	-0.0029	0.9231	0.0305	FALSE	TRUE
CD45RA- CD28- CD8br AC	Alzheimer's disease	rs149782409	T	C	T	C	314.9	2.47999e-06	66.75	0.0326	0.3014	0.0316	FALSE	TRUE
CD45RA- CD28- CD8br AC	Alzheimer's disease	rs149957527	A	G	A	G	913.1	4.71411e-20	98.95	0.0154	0.743201	0.047	FALSE	TRUE
CD45RA- CD28- CD8br AC	Alzheimer's disease	rs149981836	G	A	G	A	58.1	5.73905e-06	12.79	0.0128	0.7887	0.0479	FALSE	TRUE
CD45RA- CD28- CD8br AC	Alzheimer's disease	rs149994650	A	C	A	C	473.4	6.09804e-09	81.22	-0.0394	0.2928	0.0374	FALSE	TRUE
CD45RA- CD28- CD8br AC	Alzheimer's disease	rs150383571	C	T	C	T	61.29	4.77101e-08	11.2	0.1135	0.0396296	0.0552	FALSE	TRUE
CD45RA- CD28- CD8br AC	Alzheimer's disease	rs150416566	T	C	T	C	38.01	2.27101e-06	8.027	0.0163	0.5734	0.0289	FALSE	TRUE
CD45RA- CD28- CD8br AC	Alzheimer's disease	rs150427323	A	G	A	G	352.4	1.08593e-12	49.32	-0.1067	0.02635	0.048	FALSE	TRUE
CD45RA- CD28- CD8br AC	Alzheimer's disease	rs150650566	C	A	C	A	530.8	1.80593e-19	58.46	0.0003	0.9948	0.0462	FALSE	TRUE
CD45RA- CD28- CD8br AC	Alzheimer's disease	rs150841550	A	G	A	G	244.1	7.17893e-07	49.16	0.0606	0.0961103	0.0364	FALSE	TRUE
CD45RA- CD28- CD8br AC	Alzheimer's disease	rs150856260	T	C	T	C	337.2	3.73396e-10	53.66	-0.0258	0.5308	0.0412	FALSE	TRUE
CD45RA- CD28- CD8br AC	Alzheimer's disease	rs151052734	A	G	A	G	116.2	7.51208e-08	21.55	-0.0203	0.441199	0.0263	FALSE	TRUE
CD45RA- CD28- CD8br AC	Alzheimer's disease	rs151120803	A	G	A	G	402.2	4.24326e-11	60.78	-0.0534	0.1166	0.034	FALSE	TRUE
CD45RA- CD28- CD8br AC	Alzheimer's disease	rs151145927	A	G	A	G	613.8	1.49899e-11	90.65	-0.012	0.7484	0.0375	FALSE	TRUE
CD45RA- CD28- CD8br AC	Alzheimer's disease	rs151237482	C	A	C	A	416.3	2.82293e-21	43.68	0.0349	0.4939	0.051	FALSE	TRUE
CD45RA- CD28- CD8br AC	Alzheimer's disease	rs151261173	A	G	A	G	177.3	1.16899e-06	36.41	0.0449	0.1714	0.0328	FALSE	TRUE
CD45RA- CD28- CD8br AC	Alzheimer's disease	rs1522563	T	C	T	C	173.4	3.45398e-06	37.29	0.034	0.5448	0.0562	FALSE	TRUE
CD45RA- CD28- CD8br AC	Alzheimer's disease	rs16864501	A	G	A	G	760.5	5.25291e-14	100.6	0.0576	0.0699697	0.0318	FALSE	TRUE
CD45RA- CD28- CD8br AC	Alzheimer's disease	rs17212998	G	A	G	A	101.4	3.249e-08	18.3	0.0144	0.8429	0.0727	FALSE	TRUE
CD45RA- CD28- CD8br AC	Alzheimer's disease	rs17712916	A	G	A	G	122.4	2.21401e-06	25.83	-0.0223	0.2466	0.0192	FALSE	TRUE
CD45RA- CD28- CD8br AC	Alzheimer's disease	rs182784388	T	G	T	G	328.7	5.39896e-09	56.2	0.0795	0.3154	0.0792	FALSE	TRUE
CD45RA- CD28- CD8br AC	Alzheimer's disease	rs183097749	G	A	G	A	284.6	4.41296e-07	56.25	-0.0687	0.1359	0.0461	FALSE	TRUE
CD45RA- CD28- CD8br AC	Alzheimer's disease	rs183382760	C	A	C	A	1005	1.39187e-14	130	0.0291	0.4284	0.0367	FALSE	TRUE
CD45RA- CD28- CD8br AC	Alzheimer's disease	rs184901419	A	C	A	C	282.4	7.47705e-06	62.95	-0.0198	0.7165	0.0545	FALSE	TRUE
CD45RA- CD28- CD8br AC	Alzheimer's disease	rs185697137	C	T	C	T	183.6	7.19101e-07	36.98	-0.0645	0.1442	0.0441	FALSE	TRUE
CD45RA- CD28- CD8br AC	Alzheimer's disease	rs185778924	A	G	A	G	332.4	3.92004e-09	56.32	0.0588	0.2525	0.0514	FALSE	TRUE
CD45RA- CD28- CD8br AC	Alzheimer's disease	rs185854402	C	T	C	T	157.9	5.39598e-06	34.66	0.0577	0.1764	0.0427	FALSE	TRUE
CD45RA- CD28- CD8br AC	Alzheimer's disease	rs186595909	A	G	A	G	402.2	2.386e-08	71.9	0.0402	0.2717	0.0366	FALSE	TRUE
CD45RA- CD28- CD8br AC	Alzheimer's disease	rs188394601	G	T	G	T	654.7	1.05599e-08	114.1	-0.0512	0.243	0.0439	FALSE	TRUE
CD45RA- CD28- CD8br AC	Alzheimer's disease	rs189683893	A	C	A	C	138.5	1.79999e-10	21.65	-0.0075	0.8238	0.0339	FALSE	TRUE
CD45RA- CD28- CD8br AC	Alzheimer's disease	rs190474871	T	C	T	C	169	4.71303e-06	36.86	0.0153	0.6716	0.0362	FALSE	TRUE
CD45RA- CD28- CD8br AC	Alzheimer's disease	rs191357081	G	A	G	A	263.2	1.088e-06	53.88	-0.0128	0.6609	0.0293	FALSE	TRUE
CD45RA- CD28- CD8br AC	Alzheimer's disease	rs191604848	T	C	T	C	371.3	5.47797e-06	81.55	0.0382	0.5358	0.0616	FALSE	TRUE
CD45RA- CD28- CD8br AC	Alzheimer's disease	rs192021609	A	G	A	G	186.7	3.36504e-07	36.52	0.054	0.1181	0.0345	FALSE	TRUE
CD45RA- CD28- CD8br AC	Alzheimer's disease	rs192302673	T	C	T	C	317.4	2.33884e-13	43.13	0.0234	0.605399	0.0453	FALSE	TRUE
CD45RA- CD28- CD8br AC	Alzheimer's disease	rs192553272	T	C	T	C	293.3	2.15501e-09	48.87	0.0247	0.5362	0.0399	FALSE	TRUE
CD45RA- CD28- CD8br AC	Alzheimer's disease	rs192932211	G	A	G	A	227.1	1.5e-06	47.11	0.0283	0.4638	0.0387	FALSE	TRUE
CD45RA- CD28- CD8br AC	Alzheimer's disease	rs2071556	T	G	T	G	-14.59	2.40398e-07	2.819	-0.0071	0.3911	0.0083	FALSE	TRUE
CD45RA- CD28- CD8br AC	Alzheimer's disease	rs2615702	T	C	T	C	-397.5	2.39994e-20	42.74	0.0237	0.5569	0.0404	FALSE	TRUE
CD45RA- CD28- CD8br AC	Alzheimer's disease	rs28622225	A	G	A	G	202.2	5.66096e-07	40.35	0.0229	0.597901	0.0434	FALSE	TRUE
CD45RA- CD28- CD8br AC	Alzheimer's disease	rs3133836	C	T	C	T	24.38	1.10499e-06	4.994	-0.0169	0.2519	0.0148	FALSE	TRUE
CD45RA- CD28- CD8br AC	Alzheimer's disease	rs34499829	A	G	A	G	308	4.56194e-10	49.26	0.033	0.4631	0.045	FALSE	TRUE
CD45RA- CD28- CD8br AC	Alzheimer's disease	rs34592474	C	T	C	T	256.7	1.911e-08	45.57	0.0005	0.9889	0.0379	FALSE	TRUE
CD45RA- CD28- CD8br AC	Alzheimer's disease	rs34609592	A	G	A	G	420	3.874e-09	71.13	0.0123	0.7616	0.0404	FALSE	TRUE
CD45RA- CD28- CD8br AC	Alzheimer's disease	rs35046933	G	A	G	A	112.1	2.54501e-06	23.78	0.0434	0.1197	0.0279	FALSE	TRUE
CD45RA- CD28- CD8br AC	Alzheimer's disease	rs35078472	C	A	C	A	215.5	3.27401e-06	46.23	0.1029	0.00778198	0.0387	FALSE	TRUE
CD45RA- CD28- CD8br AC	Alzheimer's disease	rs35268412	C	T	C	T	184.5	1.62002e-06	38.41	-0.0514	0.0808593	0.0294	FALSE	TRUE
CD45RA- CD28- CD8br AC	Alzheimer's disease	rs35779961	A	G	A	G	229.9	8.66702e-07	46.65	0.0128	0.649299	0.0282	FALSE	TRUE
CD45RA- CD28- CD8br AC	Alzheimer's disease	rs45507192	A	G	A	G	416.6	2.57697e-08	74.65	0.0753	0.0909494	0.0446	FALSE	TRUE
CD45RA- CD28- CD8br AC	Alzheimer's disease	rs528814030	T	C	T	C	134.4	6.06303e-07	26.88	0.0045	0.8486	0.0238	FALSE	TRUE
CD45RA- CD28- CD8br AC	Alzheimer's disease	rs535005711	A	G	A	G	557.6	4.90603e-08	102	0.0328	0.4164	0.0403	FALSE	TRUE
CD45RA- CD28- CD8br AC	Alzheimer's disease	rs541695620	G	A	G	A	29.71	5.28896e-07	5.912	-0.0024	0.9394	0.031	FALSE	TRUE
CD45RA- CD28- CD8br AC	Alzheimer's disease	rs545794900	C	T	C	T	137.7	9.63607e-10	22.45	-0.0755	0.0259298	0.0339	FALSE	TRUE
CD45RA- CD28- CD8br AC	Alzheimer's disease	rs554483844	T	C	T	C	227.3	1.393e-06	47.01	-0.0113	0.7951	0.0434	FALSE	TRUE
CD45RA- CD28- CD8br AC	Alzheimer's disease	rs55779481	T	C	T	C	111.7	8.35699e-06	25.03	0.0863	0.0182499	0.0366	FALSE	TRUE
CD45RA- CD28- CD8br AC	Alzheimer's disease	rs55830085	T	C	T	C	548.7	3.00802e-08	98.8	0.0282	0.341	0.0296	FALSE	TRUE
CD45RA- CD28- CD8br AC	Alzheimer's disease	rs55881385	T	G	T	G	721.2	4.49573e-15	91.57	0.0524	0.1331	0.0349	FALSE	TRUE
CD45RA- CD28- CD8br AC	Alzheimer's disease	rs578157000	C	A	C	A	111.4	8.10196e-06	24.93	-0.0167	0.623499	0.0341	FALSE	TRUE
CD45RA- CD28- CD8br AC	Alzheimer's disease	rs58860560	A	C	A	C	404.2	2.088e-08	71.96	-0.028	0.5129	0.0427	FALSE	TRUE
CD45RA- CD28- CD8br AC	Alzheimer's disease	rs58905133	G	A	G	A	20.08	1.17788e-12	2.814	-0.007	0.4148	0.0086	FALSE	TRUE
CD45RA- CD28- CD8br AC	Alzheimer's disease	rs59236867	C	T	C	T	178.9	9.06985e-11	27.52	0.0798	0.0786394	0.0454	FALSE	TRUE
CD45RA- CD28- CD8br AC	Alzheimer's disease	rs59951086	C	A	C	A	347.8	6.80597e-10	56.2	-0.0977	0.1154	0.0621	FALSE	TRUE
CD45RA- CD28- CD8br AC	Alzheimer's disease	rs6027989	T	C	T	C	11.73	9.59909e-06	2.646	0.011	0.1778	0.0082	FALSE	TRUE
CD45RA- CD28- CD8br AC	Alzheimer's disease	rs61772921	C	T	C	T	644.1	1.37401e-09	106	-0.0217	0.5267	0.0342	FALSE	TRUE
CD45RA- CD28- CD8br AC	Alzheimer's disease	rs61864030	C	T	C	T	284.3	3.68604e-08	51.52	-0.0157	0.5775	0.0282	FALSE	TRUE
CD45RA- CD28- CD8br AC	Alzheimer's disease	rs61939536	G	A	G	A	379.5	1.82898e-07	72.6	0.0171	0.6142	0.034	FALSE	TRUE
CD45RA- CD28- CD8br AC	Alzheimer's disease	rs61988500	C	T	C	T	296.2	3.93396e-09	50.18	0.002	0.9525	0.0339	FALSE	TRUE
CD45RA- CD28- CD8br AC	Alzheimer's disease	rs62021713	T	C	T	C	1065	1.78402e-09	176.6	0.0532	0.05668	0.0279	FALSE	TRUE
CD45RA- CD28- CD8br AC	Alzheimer's disease	rs62369101	A	G	A	G	251.6	2.78298e-09	42.22	-0.0414	0.2352	0.0348	FALSE	TRUE
CD45RA- CD28- CD8br AC	Alzheimer's disease	rs62383308	A	G	A	G	38.64	9.15503e-06	8.697	-0.0259	0.0934695	0.0154	FALSE	TRUE
CD45RA- CD28- CD8br AC	Alzheimer's disease	rs62409210	A	G	A	G	610.4	1.10999e-08	106.6	0.0201	0.5295	0.032	FALSE	TRUE
CD45RA- CD28- CD8br AC	Alzheimer's disease	rs62488802	T	C	T	C	591.6	3.55713e-12	84.77	0.0423	0.3323	0.0437	FALSE	TRUE
CD45RA- CD28- CD8br AC	Alzheimer's disease	rs62513410	A	G	A	G	75.05	8.28705e-09	12.99	0.0123	0.643501	0.0266	FALSE	TRUE
CD45RA- CD28- CD8br AC	Alzheimer's disease	rs62582217	T	C	T	C	49.04	4.88596e-07	9.728	-0.021	0.3836	0.0242	FALSE	TRUE
CD45RA- CD28- CD8br AC	Alzheimer's disease	rs6586916	C	A	C	A	-101.9	9.65006e-07	20.76	-0.0255	0.3265	0.0259	FALSE	TRUE
CD45RA- CD28- CD8br AC	Alzheimer's disease	rs7011687	G	A	G	A	93.75	6.00399e-06	20.68	-0.0337	0.3129	0.0334	FALSE	TRUE
CD45RA- CD28- CD8br AC	Alzheimer's disease	rs71354045	C	T	C	T	135.1	2.99502e-07	26.31	-0.0508	0.1619	0.0363	FALSE	TRUE
CD45RA- CD28- CD8br AC	Alzheimer's disease	rs71567655	A	G	A	G	211.9	7.13707e-07	42.67	-0.0042	0.9162	0.0403	FALSE	TRUE
CD45RA- CD28- CD8br AC	Alzheimer's disease	rs7238907	C	T	C	T	257.3	5.52497e-08	47.25	0.0171	0.6584	0.0387	FALSE	TRUE
CD45RA- CD28- CD8br AC	Alzheimer's disease	rs72673255	A	G	A	G	202.6	3.41499e-07	39.65	-0.0076	0.8262	0.0346	FALSE	TRUE
CD45RA- CD28- CD8br AC	Alzheimer's disease	rs72728362	C	T	C	T	375.7	2.635e-10	59.27	-0.0466	0.1669	0.0337	FALSE	TRUE
CD45RA- CD28- CD8br AC	Alzheimer's disease	rs72739876	T	G	T	G	465.5	1.74e-07	88.9	0.0097	0.784	0.0352	FALSE	TRUE
CD45RA- CD28- CD8br AC	Alzheimer's disease	rs72743927	G	A	G	A	154.6	4.02198e-07	30.45	-0.0142	0.7001	0.0368	FALSE	TRUE
CD45RA- CD28- CD8br AC	Alzheimer's disease	rs72773345	G	A	G	A	302.9	2.19301e-06	63.85	0.0206	0.4783	0.0291	FALSE	TRUE
CD45RA- CD28- CD8br AC	Alzheimer's disease	rs72815709	C	T	C	T	185.1	6.76083e-12	26.88	0.0152	0.4819	0.0217	FALSE	TRUE
CD45RA- CD28- CD8br AC	Alzheimer's disease	rs72847598	C	T	C	T	319.5	1.86999e-09	53.02	-0.0446	0.3783	0.0507	FALSE	TRUE
CD45RA- CD28- CD8br AC	Alzheimer's disease	rs72929459	T	C	T	C	485.7	3.28927e-11	72.98	-0.0314	0.4675	0.0433	FALSE	TRUE
CD45RA- CD28- CD8br AC	Alzheimer's disease	rs72996438	C	T	C	T	306.9	2.41602e-07	59.3	-0.0099	0.723501	0.0279	FALSE	TRUE
CD45RA- CD28- CD8br AC	Alzheimer's disease	rs74603821	C	A	C	A	591.3	3.23303e-09	99.63	-0.024	0.4919	0.0349	FALSE	TRUE
CD45RA- CD28- CD8br AC	Alzheimer's disease	rs74637079	T	C	T	C	210.9	7.171e-06	46.9	-0.0238	0.611499	0.0468	FALSE	TRUE
CD45RA- CD28- CD8br AC	Alzheimer's disease	rs74827547	G	T	G	T	128.6	7.86593e-06	28.74	0.0106	0.8308	0.0494	FALSE	TRUE
CD45RA- CD28- CD8br AC	Alzheimer's disease	rs74902462	T	C	T	C	123.2	1.42498e-08	21.68	0.0083	0.746401	0.0257	FALSE	TRUE
CD45RA- CD28- CD8br AC	Alzheimer's disease	rs74932477	A	G	A	G	405.6	5.83579e-11	61.74	-0.1125	0.0220201	0.0491	FALSE	TRUE
CD45RA- CD28- CD8br AC	Alzheimer's disease	rs75005340	A	C	A	C	189.6	1.17501e-07	35.71	0.0877	0.08163	0.0504	FALSE	TRUE
CD45RA- CD28- CD8br AC	Alzheimer's disease	rs75067089	T	C	T	C	144.2	2.28802e-07	27.81	-0.0188	0.5843	0.0344	FALSE	TRUE
CD45RA- CD28- CD8br AC	Alzheimer's disease	rs75067680	A	G	A	G	160.1	1.422e-06	33.15	0.0006	0.9878	0.0375	FALSE	TRUE
CD45RA- CD28- CD8br AC	Alzheimer's disease	rs75097808	G	T	G	T	114.9	4.11898e-07	22.64	0.0569	0.0844092	0.033	FALSE	TRUE
CD45RA- CD28- CD8br AC	Alzheimer's disease	rs75225279	T	G	T	G	504.2	1.40699e-07	95.57	-0.0581	0.2907	0.055	FALSE	TRUE
CD45RA- CD28- CD8br AC	Alzheimer's disease	rs75346347	T	C	T	C	88.88	2.65901e-08	15.94	-0.0448	0.2259	0.037	FALSE	TRUE
CD45RA- CD28- CD8br AC	Alzheimer's disease	rs75420474	C	T	C	T	538.9	4.02624e-13	73.99	0.0427	0.3575	0.0464	FALSE	TRUE
CD45RA- CD28- CD8br AC	Alzheimer's disease	rs75427771	A	C	A	C	150.9	6.90001e-08	27.91	0.003	0.941	0.0412	FALSE	TRUE
CD45RA- CD28- CD8br AC	Alzheimer's disease	rs75477291	A	G	A	G	121.8	4.26501e-07	24.04	-0.0243	0.3085	0.0239	FALSE	TRUE
CD45RA- CD28- CD8br AC	Alzheimer's disease	rs75686073	A	G	A	G	98.24	4.20397e-06	21.32	0.0501	0.127	0.0328	FALSE	TRUE
CD45RA- CD28- CD8br AC	Alzheimer's disease	rs75828981	A	G	A	G	283	1.554e-09	46.74	0.0109	0.7751	0.0383	FALSE	TRUE
CD45RA- CD28- CD8br AC	Alzheimer's disease	rs75884646	A	G	A	G	186.4	2.25996e-11	27.77	0.0344	0.2516	0.03	FALSE	TRUE
CD45RA- CD28- CD8br AC	Alzheimer's disease	rs76119911	G	A	G	A	166.5	7.95793e-08	30.94	-0.0363	0.2325	0.0304	FALSE	TRUE
CD45RA- CD28- CD8br AC	Alzheimer's disease	rs76383831	G	A	G	A	294.5	6.27697e-07	59	0.0449	0.1333	0.0299	FALSE	TRUE
CD45RA- CD28- CD8br AC	Alzheimer's disease	rs76506268	G	A	G	A	154.5	8.23e-12	22.53	-0.0099	0.6367	0.0209	FALSE	TRUE
CD45RA- CD28- CD8br AC	Alzheimer's disease	rs76595423	G	T	G	T	147.3	3.92898e-10	23.48	-0.0178	0.3926	0.0209	FALSE	TRUE
CD45RA- CD28- CD8br AC	Alzheimer's disease	rs76732756	A	G	A	G	187	1.74401e-08	33.11	-0.0054	0.8838	0.037	FALSE	TRUE
CD45RA- CD28- CD8br AC	Alzheimer's disease	rs76881655	A	C	A	C	92.71	5.95703e-06	20.44	0.0014	0.9726	0.0411	FALSE	TRUE
CD45RA- CD28- CD8br AC	Alzheimer's disease	rs77152285	G	A	G	A	285.1	2.10601e-08	50.77	0.0104	0.7858	0.0383	FALSE	TRUE
CD45RA- CD28- CD8br AC	Alzheimer's disease	rs77164608	A	G	A	G	379.6	5.75599e-10	61.08	0.0291	0.4436	0.038	FALSE	TRUE
CD45RA- CD28- CD8br AC	Alzheimer's disease	rs77243672	G	T	G	T	109	4.63767e-12	15.71	0.0123	0.7641	0.0408	FALSE	TRUE
CD45RA- CD28- CD8br AC	Alzheimer's disease	rs77307127	T	C	T	C	141.3	2.20902e-06	29.8	-0.0004	0.9881	0.0271	FALSE	TRUE
CD45RA- CD28- CD8br AC	Alzheimer's disease	rs77577578	A	C	A	C	208	4.69797e-07	41.21	0.0147	0.7995	0.0579	FALSE	TRUE
CD45RA- CD28- CD8br AC	Alzheimer's disease	rs77654966	A	G	A	G	26.01	9.29694e-06	5.859	0.0229	0.3842	0.0264	FALSE	TRUE
CD45RA- CD28- CD8br AC	Alzheimer's disease	rs77721642	G	A	G	A	147.8	1.258e-06	30.44	0.0318	0.1652	0.0229	FALSE	TRUE
CD45RA- CD28- CD8br AC	Alzheimer's disease	rs77777749	G	A	G	A	102.9	1.96798e-06	21.6	0.0324	0.4049	0.0389	FALSE	TRUE
CD45RA- CD28- CD8br AC	Alzheimer's disease	rs77843545	T	C	T	C	102.4	2.20999e-06	21.6	-0.0003	0.9929	0.0359	FALSE	TRUE
CD45RA- CD28- CD8br AC	Alzheimer's disease	rs77937827	C	T	C	T	358.8	2.28302e-10	56.41	-0.0089	0.723199	0.0251	FALSE	TRUE
CD45RA- CD28- CD8br AC	Alzheimer's disease	rs77953154	T	C	T	C	55.15	3.96497e-06	11.93	-0.011	0.732501	0.0322	FALSE	TRUE
CD45RA- CD28- CD8br AC	Alzheimer's disease	rs78134440	C	A	C	A	160.1	2.25102e-06	33.79	-0.0219	0.631801	0.0457	FALSE	TRUE
CD45RA- CD28- CD8br AC	Alzheimer's disease	rs78420941	A	G	A	G	165.4	3.40596e-06	35.54	0.0574	0.1562	0.0405	FALSE	TRUE
CD45RA- CD28- CD8br AC	Alzheimer's disease	rs78604443	A	C	A	C	46.66	1.88699e-06	9.776	-0.0328	0.1821	0.0246	FALSE	TRUE
CD45RA- CD28- CD8br AC	Alzheimer's disease	rs78656354	A	G	A	G	263.3	1.89496e-12	37.24	-0.0235	0.5076	0.0354	FALSE	TRUE
CD45RA- CD28- CD8br AC	Alzheimer's disease	rs78680127	A	G	A	G	82	2.093e-06	17.26	0.0056	0.8202	0.0248	FALSE	TRUE
CD45RA- CD28- CD8br AC	Alzheimer's disease	rs78849864	T	C	T	C	96.8	1.04201e-06	19.78	-0.0148	0.7118	0.0399	FALSE	TRUE
CD45RA- CD28- CD8br AC	Alzheimer's disease	rs78939697	C	A	C	A	74.28	1.287e-10	11.52	-0.0155	0.6789	0.0375	FALSE	TRUE
CD45RA- CD28- CD8br AC	Alzheimer's disease	rs79407975	A	C	A	C	389.2	4.144e-08	70.79	0.0399	0.2474	0.0345	FALSE	TRUE
CD45RA- CD28- CD8br AC	Alzheimer's disease	rs79489889	A	G	A	G	239.7	1.26101e-08	42.01	-0.0398	0.4879	0.0574	FALSE	TRUE
CD45RA- CD28- CD8br AC	Alzheimer's disease	rs79647440	T	C	T	C	521.4	2.07501e-09	86.78	-0.091	0.0369598	0.0436	FALSE	TRUE
CD45RA- CD28- CD8br AC	Alzheimer's disease	rs79656514	A	G	A	G	80.28	3.66699e-06	17.31	-0.0213	0.4767	0.03	FALSE	TRUE
CD45RA- CD28- CD8br AC	Alzheimer's disease	rs79665127	C	T	C	T	155.8	1.758e-06	32.54	-0.0495	0.1899	0.0378	FALSE	TRUE
CD45RA- CD28- CD8br AC	Alzheimer's disease	rs79870119	A	G	A	G	397.6	3.49599e-08	71.92	-0.0026	0.9361	0.0326	FALSE	TRUE
CD45RA- CD28- CD8br AC	Alzheimer's disease	rs79888820	C	T	C	T	514.7	3.96899e-10	82.05	-0.0065	0.8628	0.0376	FALSE	TRUE
CD45RA- CD28- CD8br AC	Alzheimer's disease	rs79932972	A	C	A	C	187.5	1.63399e-06	39.04	0.0019	0.9497	0.0307	FALSE	TRUE
CD45RA- CD28- CD8br AC	Alzheimer's disease	rs80012883	T	G	T	G	368.8	2.585e-08	66.09	-0.0719	0.05332	0.0372	FALSE	TRUE
CD45RA- CD28- CD8br AC	Alzheimer's disease	rs80036087	T	C	T	C	70.99	9.30808e-07	14.44	0.0401	0.0483304	0.0203	FALSE	TRUE
CD45RA- CD28- CD8br AC	Alzheimer's disease	rs80139012	A	G	A	G	40.96	1.42801e-06	8.481	0.0041	0.9241	0.0428	FALSE	TRUE
CD45RA- CD28- CD8br AC	Alzheimer's disease	rs80142250	T	C	T	C	128.8	6.54395e-09	22.13	-0.0288	0.5024	0.043	FALSE	TRUE
CD45RA- CD28- CD8br AC	Alzheimer's disease	rs8056824	C	T	C	T	-177.9	1.567e-07	33.85	0.0054	0.8774	0.0348	FALSE	TRUE
BAFF-R on IgD- CD38br	Alzheimer's disease	rs10071113	A	G	A	G	0.1861	9.11696e-06	0.04188	0.0295	0.0413599	0.0145	FALSE	TRUE
BAFF-R on IgD- CD38br	Alzheimer's disease	rs139784925	T	C	T	C	-0.2552	3.22998e-06	0.05474	0.0123	0.632501	0.0258	FALSE	TRUE
BAFF-R on IgD- CD38br	Alzheimer's disease	rs146069723	T	C	T	C	-0.2315	8.99394e-07	0.04704	-0.0462	0.1579	0.0327	FALSE	TRUE
BAFF-R on IgD- CD38br	Alzheimer's disease	rs147645513	T	C	T	C	-0.4405	5.09296e-06	0.09644	0.0212	0.5608	0.0364	FALSE	TRUE
BAFF-R on IgD- CD38br	Alzheimer's disease	rs149192849	C	T	C	T	-0.3114	1.34899e-08	0.0547	0.0277	0.2505	0.0241	FALSE	TRUE
BAFF-R on IgD- CD38br	Alzheimer's disease	rs17828306	G	A	G	A	0.1256	2.37001e-06	0.02658	-0.0075	0.4122	0.0092	FALSE	TRUE
BAFF-R on IgD- CD38br	Alzheimer's disease	rs17878304	T	C	T	C	-0.3061	4.98001e-06	0.06694	-0.0029	0.8636	0.0168	FALSE	TRUE
BAFF-R on IgD- CD38br	Alzheimer's disease	rs2479085	C	T	C	T	-0.1772	2.62102e-06	0.03766	-0.0317	0.0363496	0.0152	FALSE	TRUE
BAFF-R on IgD- CD38br	Alzheimer's disease	rs4822134	C	T	C	T	0.1467	6.78203e-09	0.02525	-0.0051	0.5365	0.0083	FALSE	TRUE
BAFF-R on IgD- CD38br	Alzheimer's disease	rs561920	C	T	C	T	0.1358	4.49397e-06	0.02955	0.0103	0.311	0.0102	FALSE	TRUE
BAFF-R on IgD- CD38br	Alzheimer's disease	rs643428	T	C	T	C	0.1106	6.90605e-06	0.02456	0.0056	0.5079	0.0084	FALSE	TRUE
BAFF-R on IgD- CD38br	Alzheimer's disease	rs66717547	A	G	A	G	0.5147	5.19601e-06	0.1128	0.0062	0.7625	0.0205	FALSE	TRUE
BAFF-R on IgD- CD38br	Alzheimer's disease	rs73165129	T	C	T	C	-0.5288	4.96249e-38	0.04055	0.0023	0.8787	0.015	FALSE	TRUE
BAFF-R on IgD- CD38br	Alzheimer's disease	rs73269620	C	T	C	T	-0.1197	1.74201e-06	0.025	0.0041	0.6498	0.0091	FALSE	TRUE
BAFF-R on IgD- CD38br	Alzheimer's disease	rs79868028	A	G	A	G	0.1897	8.44092e-06	0.04254	0.0015	0.914	0.0137	FALSE	TRUE
CD14 on CD14+ CD16+ monocyte	Alzheimer's disease	rs10071982	G	A	G	A	-0.1153	3.91697e-06	0.02494	-0.0128	0.1202	0.0082	FALSE	TRUE
CD14 on CD14+ CD16+ monocyte	Alzheimer's disease	rs117306778	T	G	T	G	-0.2604	5.46298e-06	0.05719	-0.019	0.2796	0.0176	FALSE	TRUE
CD14 on CD14+ CD16+ monocyte	Alzheimer's disease	rs12262055	T	C	T	C	-0.1408	7.12098e-06	0.03132	-0.011	0.2737	0.01	FALSE	TRUE
CD14 on CD14+ CD16+ monocyte	Alzheimer's disease	rs12593041	T	C	T	C	0.1733	2.23398e-06	0.03657	-0.0155	0.1607	0.0111	FALSE	TRUE
CD14 on CD14+ CD16+ monocyte	Alzheimer's disease	rs13043397	T	C	T	C	0.1236	3.819e-06	0.0267	-0.0019	0.8349	0.0089	FALSE	TRUE
CD14 on CD14+ CD16+ monocyte	Alzheimer's disease	rs13248932	C	T	C	T	0.1727	4.55198e-06	0.03761	0.0118	0.2829	0.011	FALSE	TRUE
CD14 on CD14+ CD16+ monocyte	Alzheimer's disease	rs17111403	T	C	T	C	-0.237	9.33899e-06	0.05339	0.0204	0.199	0.0159	FALSE	TRUE
CD14 on CD14+ CD16+ monocyte	Alzheimer's disease	rs2569177	T	G	T	G	0.1645	6.78094e-10	0.02658	0.0068	0.4477	0.009	FALSE	TRUE
CD14 on CD14+ CD16+ monocyte	Alzheimer's disease	rs26894	C	T	C	T	-0.1154	3.76504e-06	0.02491	-0.0038	0.6708	0.0089	FALSE	TRUE
CD14 on CD14+ CD16+ monocyte	Alzheimer's disease	rs4291738	T	G	T	G	0.2134	1.348e-06	0.04407	0.0129	0.4724	0.018	FALSE	TRUE
CD14 on CD14+ CD16+ monocyte	Alzheimer's disease	rs61759062	G	T	G	T	0.1834	1.434e-06	0.03799	0.0148	0.1504	0.0103	FALSE	TRUE
CD14 on CD14+ CD16+ monocyte	Alzheimer's disease	rs61922057	T	C	T	C	-0.1893	2.362e-06	0.04005	0.0382	0.002256	0.0125	FALSE	TRUE
CD14 on CD14+ CD16+ monocyte	Alzheimer's disease	rs62037895	G	A	G	A	-0.1502	9.62299e-06	0.03389	-0.0328	0.004652	0.0116	FALSE	TRUE
CD14 on CD14+ CD16+ monocyte	Alzheimer's disease	rs6671847	A	G	A	G	0.1769	4.70111e-11	0.02681	0.0094	0.2494	0.0082	FALSE	TRUE
CD14 on CD14+ CD16+ monocyte	Alzheimer's disease	rs71586370	C	T	C	T	-0.7623	3.06401e-06	0.1631	-0.0281	0.4388	0.0363	FALSE	TRUE
CD20 on IgD+ CD24-	Alzheimer's disease	rs1007337	T	C	T	C	-0.1254	6.28001e-07	0.02513	-0.002	0.8144	0.0086	FALSE	TRUE
CD20 on IgD+ CD24-	Alzheimer's disease	rs11051833	T	C	T	C	-0.3439	3.27801e-06	0.07379	-0.0095	0.5372	0.0154	FALSE	TRUE
CD20 on IgD+ CD24-	Alzheimer's disease	rs11059642	A	G	A	G	0.1427	2.73798e-06	0.03038	0.0099	0.2713	0.009	FALSE	TRUE
CD20 on IgD+ CD24-	Alzheimer's disease	rs111741355	A	G	A	G	-2.647	3.67299e-06	0.5709	0.0374	0.1974	0.029	FALSE	TRUE
CD20 on IgD+ CD24-	Alzheimer's disease	rs113371046	A	G	A	G	0.2407	2.06101e-06	0.05062	0.0158	0.3909	0.0184	FALSE	TRUE
CD20 on IgD+ CD24-	Alzheimer's disease	rs12771377	G	A	G	A	0.2859	8.22906e-06	0.06402	-0.0211	0.1529	0.0148	FALSE	TRUE
CD20 on IgD+ CD24-	Alzheimer's disease	rs149360160	T	C	T	C	-2.452	2.27698e-06	0.5179	-0.0155	0.7405	0.0469	FALSE	TRUE
CD20 on IgD+ CD24-	Alzheimer's disease	rs2066399	A	G	A	G	0.2255	2.94781e-12	0.03219	0.0091	0.3949	0.0107	FALSE	TRUE
CD20 on IgD+ CD24-	Alzheimer's disease	rs233495	T	C	T	C	-0.124	5.90201e-07	0.02479	-0.0037	0.6581	0.0083	FALSE	TRUE
CD20 on IgD+ CD24-	Alzheimer's disease	rs388354	C	A	C	A	-0.1327	5.70598e-08	0.0244	-0.0055	0.5097	0.0084	FALSE	TRUE
CD20 on IgD+ CD24-	Alzheimer's disease	rs4939384	G	A	G	A	-0.2046	2.29192e-16	0.02482	0.0019	0.819	0.0082	FALSE	TRUE
CD20 on IgD+ CD24-	Alzheimer's disease	rs55643835	T	C	T	C	-0.2783	2.66502e-07	0.05397	-0.0175	0.2307	0.0146	FALSE	TRUE
CD20 on IgD+ CD24-	Alzheimer's disease	rs56132967	T	G	T	G	-0.3532	5.92298e-06	0.07788	0.0134	0.4168	0.0165	FALSE	TRUE
CD20 on IgD+ CD24-	Alzheimer's disease	rs6443362	T	C	T	C	0.1113	6.28507e-06	0.02461	-0.0008	0.9186	0.0082	FALSE	TRUE
CD20 on IgD+ CD24-	Alzheimer's disease	rs6496328	T	C	T	C	-0.2998	2.31499e-06	0.06337	-0.0092	0.454	0.0123	FALSE	TRUE
CD20 on IgD+ CD24-	Alzheimer's disease	rs72836542	T	C	T	C	0.1645	9.87006e-10	0.02685	-0.0087	0.3342	0.009	FALSE	TRUE
CD20 on IgD+ CD24-	Alzheimer's disease	rs73086355	A	C	A	C	-0.2701	7.31796e-06	0.06014	0.0197	0.2019	0.0155	FALSE	TRUE
CD20 on IgD+ CD24-	Alzheimer's disease	rs73245560	C	T	C	T	0.4287	3.743e-06	0.09254	-0.0003	0.9904	0.0219	FALSE	TRUE
CD20 on IgD+ CD24-	Alzheimer's disease	rs7404890	A	G	A	G	0.1749	8.42403e-08	0.03258	-0.0051	0.6127	0.01	FALSE	TRUE
CD20 on IgD+ CD24-	Alzheimer's disease	rs80155794	A	G	A	G	-0.3388	4.88304e-06	0.07403	-0.007	0.6655	0.0162	FALSE	TRUE
CD20 on IgD+ CD24-	Alzheimer's disease	rs8025257	C	T	C	T	-0.1349	4.50101e-06	0.02937	-0.0143	0.1817	0.0107	FALSE	TRUE
CD20 on IgD+ CD24-	Alzheimer's disease	rs842631	T	C	T	C	0.1195	2.38699e-06	0.02528	0.0055	0.503	0.0082	FALSE	TRUE
CD20 on IgD+ CD24-	Alzheimer's disease	rs9270560	C	T	C	T	-0.1682	1.31401e-08	0.02952	0.0184	0.0278099	0.0083	FALSE	TRUE
CD20 on IgD+ CD38dim	Alzheimer's disease	rs1007337	T	C	T	C	-0.1389	3.33503e-08	0.02509	-0.002	0.8144	0.0086	FALSE	TRUE
CD20 on IgD+ CD38dim	Alzheimer's disease	rs111741355	A	G	A	G	-2.608	4.54098e-06	0.5679	0.0374	0.1974	0.029	FALSE	TRUE
CD20 on IgD+ CD38dim	Alzheimer's disease	rs113371046	A	G	A	G	0.2316	4.76003e-06	0.05055	0.0158	0.3909	0.0184	FALSE	TRUE
CD20 on IgD+ CD38dim	Alzheimer's disease	rs12042193	G	A	G	A	-0.1223	2.054e-06	0.02571	-0.0023	0.7851	0.0084	FALSE	TRUE
CD20 on IgD+ CD38dim	Alzheimer's disease	rs1306395	C	T	C	T	0.1157	4.87405e-06	0.02527	0.0054	0.507399	0.0082	FALSE	TRUE
CD20 on IgD+ CD38dim	Alzheimer's disease	rs147586463	G	A	G	A	-0.7136	7.23003e-06	0.1588	0.017	0.6915	0.0429	FALSE	TRUE
CD20 on IgD+ CD38dim	Alzheimer's disease	rs17616173	G	A	G	A	-0.2744	5.44001e-06	0.06027	-0.01	0.4227	0.0125	FALSE	TRUE
CD20 on IgD+ CD38dim	Alzheimer's disease	rs17763050	A	G	A	G	0.1424	6.43206e-07	0.02857	-0.0525	7.61693e-08	0.0098	FALSE	TRUE
CD20 on IgD+ CD38dim	Alzheimer's disease	rs187747283	G	T	G	T	-0.165	6.06094e-06	0.03641	-0.0294	0.356	0.0318	FALSE	TRUE
CD20 on IgD+ CD38dim	Alzheimer's disease	rs2066399	A	G	A	G	0.2375	1.75186e-13	0.03213	0.0091	0.3949	0.0107	FALSE	TRUE
CD20 on IgD+ CD38dim	Alzheimer's disease	rs233493	A	G	A	G	-0.1263	8.64809e-07	0.02563	0.0017	0.8406	0.0086	FALSE	TRUE
CD20 on IgD+ CD38dim	Alzheimer's disease	rs34486765	A	G	A	G	0.167	2.89501e-10	0.02642	-0.0112	0.3173	0.0112	FALSE	TRUE
CD20 on IgD+ CD38dim	Alzheimer's disease	rs388354	C	A	C	A	-0.1329	5.39101e-08	0.02439	-0.0055	0.5097	0.0084	FALSE	TRUE
CD20 on IgD+ CD38dim	Alzheimer's disease	rs4939384	G	A	G	A	-0.236	2.5038e-21	0.02474	0.0019	0.819	0.0082	FALSE	TRUE
CD20 on IgD+ CD38dim	Alzheimer's disease	rs55643835	T	C	T	C	-0.2506	3.69999e-06	0.05406	-0.0175	0.2307	0.0146	FALSE	TRUE
CD20 on IgD+ CD38dim	Alzheimer's disease	rs61731791	T	C	T	C	0.2071	9.9901e-07	0.04225	-0.0165	0.4725	0.023	FALSE	TRUE
CD20 on IgD+ CD38dim	Alzheimer's disease	rs72836542	T	C	T	C	0.1752	7.1978e-11	0.0268	-0.0087	0.3342	0.009	FALSE	TRUE
CD20 on IgD+ CD38dim	Alzheimer's disease	rs73086355	A	C	A	C	-0.2878	1.739e-06	0.06009	0.0197	0.2019	0.0155	FALSE	TRUE
CD20 on IgD+ CD38dim	Alzheimer's disease	rs73154503	C	T	C	T	-0.2133	8.54909e-07	0.04326	0.0044	0.7977	0.0173	FALSE	TRUE
CD20 on IgD+ CD38dim	Alzheimer's disease	rs7404890	A	G	A	G	0.1788	4.22902e-08	0.03256	-0.0051	0.6127	0.01	FALSE	TRUE
CD20 on IgD+ CD38dim	Alzheimer's disease	rs77612075	T	C	T	C	0.3469	1.36e-06	0.07169	0.0056	0.7612	0.0183	FALSE	TRUE
CD20 on IgD+ CD38dim	Alzheimer's disease	rs8025257	C	T	C	T	-0.1337	5.40306e-06	0.02934	-0.0143	0.1817	0.0107	FALSE	TRUE
CD20 on IgD+ CD38dim	Alzheimer's disease	rs9270560	C	T	C	T	-0.2177	2.12716e-13	0.02955	0.0184	0.0278099	0.0083	FALSE	TRUE
CD38 on naive-mature B cell	Alzheimer's disease	rs10073475	C	T	C	T	-0.1209	2.223e-06	0.02551	0.0158	0.0538295	0.0082	FALSE	TRUE
CD38 on naive-mature B cell	Alzheimer's disease	rs11042077	A	G	A	G	0.1217	1.27101e-06	0.02507	0.0045	0.5962	0.0084	FALSE	TRUE
CD38 on naive-mature B cell	Alzheimer's disease	rs112236163	G	A	G	A	0.1589	2.42003e-07	0.03072	-0.0019	0.8482	0.01	FALSE	TRUE
CD38 on naive-mature B cell	Alzheimer's disease	rs115062208	G	A	G	A	-0.7874	5.47898e-11	0.1197	0.0239	0.4454	0.0313	FALSE	TRUE
CD38 on naive-mature B cell	Alzheimer's disease	rs12032479	T	C	T	C	-0.1719	1.40301e-07	0.03259	0.0194	0.0395403	0.0094	FALSE	TRUE
CD38 on naive-mature B cell	Alzheimer's disease	rs12428439	G	T	G	T	0.1203	2.01201e-06	0.02527	0.0019	0.8192	0.0084	FALSE	TRUE
CD38 on naive-mature B cell	Alzheimer's disease	rs12435334	A	C	A	C	0.1145	6.76597e-06	0.0254	-0.0078	0.3436	0.0083	FALSE	TRUE
CD38 on naive-mature B cell	Alzheimer's disease	rs13118578	G	T	G	T	-0.5411	7.67697e-06	0.1208	-0.0196	0.4332	0.025	FALSE	TRUE
CD38 on naive-mature B cell	Alzheimer's disease	rs139476939	C	T	C	T	0.6239	9.46695e-06	0.1407	0.0405	0.2739	0.037	FALSE	TRUE
CD38 on naive-mature B cell	Alzheimer's disease	rs146407097	A	G	A	G	-0.2522	1.892e-06	0.05285	0.0193	0.1872	0.0146	FALSE	TRUE
CD38 on naive-mature B cell	Alzheimer's disease	rs34893127	G	A	G	A	-0.135	9.14808e-06	0.0304	0.0012	0.8983	0.0097	FALSE	TRUE
CD38 on naive-mature B cell	Alzheimer's disease	rs572542	T	C	T	C	-0.3966	5.30396e-08	0.07274	-0.038	0.1365	0.0255	FALSE	TRUE
CD38 on naive-mature B cell	Alzheimer's disease	rs6895789	T	C	T	C	-0.1662	1.71799e-06	0.03469	-0.0185	0.1513	0.0129	FALSE	TRUE
CD38 on naive-mature B cell	Alzheimer's disease	rs73012119	G	T	G	T	0.1902	6.07505e-06	0.04198	-0.0026	0.8294	0.0121	FALSE	TRUE
CD38 on naive-mature B cell	Alzheimer's disease	rs753875	C	T	C	T	0.404	6.72806e-06	0.08961	-0.0136	0.6461	0.0295	FALSE	TRUE
CD38 on naive-mature B cell	Alzheimer's disease	rs7579256	T	C	T	C	0.2748	9.13798e-06	0.06185	-0.0043	0.790999	0.0162	FALSE	TRUE
CD38 on naive-mature B cell	Alzheimer's disease	rs76112278	A	G	A	G	-0.8747	1.75792e-22	0.08908	-0.0223	0.5384	0.0363	FALSE	TRUE
CD38 on naive-mature B cell	Alzheimer's disease	rs76209777	G	A	G	A	-0.2112	9.84306e-06	0.04772	-0.0093	0.5416	0.0152	FALSE	TRUE
CD38 on naive-mature B cell	Alzheimer's disease	rs76354299	A	G	A	G	-0.4181	1.65901e-09	0.06918	-0.018	0.4023	0.0215	FALSE	TRUE
CD38 on naive-mature B cell	Alzheimer's disease	rs77636066	T	G	T	G	2.101	1.702e-06	0.4382	0.0162	0.703301	0.0426	FALSE	TRUE
CD38 on naive-mature B cell	Alzheimer's disease	rs78111008	C	T	C	T	-0.7397	4.517e-06	0.161	-0.0098	0.704099	0.0259	FALSE	TRUE
CD38 on naive-mature B cell	Alzheimer's disease	rs9599916	G	A	G	A	0.1379	3.13899e-06	0.02955	-0.0012	0.8943	0.0091	FALSE	TRUE
IgD on IgD+ CD24+	Alzheimer's disease	rs10076053	A	G	A	G	0.6192	1.44301e-06	0.1283	-0.0364	0.0987393	0.022	FALSE	TRUE
IgD on IgD+ CD24+	Alzheimer's disease	rs112421400	T	C	T	C	-0.1982	1.695e-08	0.03505	0.0688	0.000390499	0.0194	FALSE	TRUE
IgD on IgD+ CD24+	Alzheimer's disease	rs1181899	C	T	C	T	0.1826	8.45298e-06	0.04095	-0.0192	0.1022	0.0117	FALSE	TRUE
IgD on IgD+ CD24+	Alzheimer's disease	rs12505403	A	G	A	G	0.212	8.11092e-08	0.03944	0.0015	0.9115	0.0133	FALSE	TRUE
IgD on IgD+ CD24+	Alzheimer's disease	rs139084170	A	C	A	C	0.3593	5.50503e-10	0.05776	0.0597	0.0904503	0.0353	FALSE	TRUE
IgD on IgD+ CD24+	Alzheimer's disease	rs144583907	G	A	G	A	0.263	8.47793e-06	0.05897	-0.0452	0.2111	0.0361	FALSE	TRUE
IgD on IgD+ CD24+	Alzheimer's disease	rs151050474	A	G	A	G	0.4701	7.39503e-07	0.0948	-0.0088	0.6938	0.0224	FALSE	TRUE
IgD on IgD+ CD24+	Alzheimer's disease	rs1794511	G	T	G	T	-0.2439	6.87385e-13	0.03383	-0.0208	0.0895303	0.0123	FALSE	TRUE
IgD on IgD+ CD24+	Alzheimer's disease	rs2630640	A	C	A	C	0.1157	9.11591e-06	0.02605	-0.0046	0.5714	0.0082	FALSE	TRUE
IgD on IgD+ CD24+	Alzheimer's disease	rs4796030	C	A	C	A	0.1187	7.55005e-06	0.02647	-0.001	0.9075	0.0082	FALSE	TRUE
IgD on IgD+ CD24+	Alzheimer's disease	rs55675835	A	G	A	G	0.3325	3.42003e-06	0.0715	0.0151	0.4935	0.0221	FALSE	TRUE
IgD on IgD+ CD24+	Alzheimer's disease	rs58259062	C	T	C	T	0.401	4.02597e-07	0.07898	-0.0469	0.1045	0.0289	FALSE	TRUE
IgD on IgD+ CD24+	Alzheimer's disease	rs72871227	T	C	T	C	-0.1198	6.50999e-06	0.02654	0.0209	0.0474297	0.0106	FALSE	TRUE
IgD on IgD+ CD24+	Alzheimer's disease	rs72944511	T	G	T	G	1.279	8.17203e-06	0.2862	0.0112	0.679301	0.0272	FALSE	TRUE
IgD on IgD+ CD24+	Alzheimer's disease	rs73022545	A	G	A	G	0.2429	4.948e-06	0.0531	0.019	0.3603	0.0208	FALSE	TRUE
IgD on IgD+ CD24+	Alzheimer's disease	rs73031919	C	T	C	T	-0.1963	6.346e-06	0.04342	-0.0025	0.8053	0.0103	FALSE	TRUE
IgD on IgD+ CD24+	Alzheimer's disease	rs74143009	A	G	A	G	0.7304	7.75408e-06	0.1631	-0.0023	0.9206	0.0235	FALSE	TRUE
IgD on IgD+ CD24+	Alzheimer's disease	rs850492	A	G	A	G	-0.1289	5.16904e-06	0.02823	-0.0002	0.986	0.0091	FALSE	TRUE
IgD on IgD+ CD24+	Alzheimer's disease	rs9265515	C	T	C	T	-0.221	1.20088e-11	0.03249	-0.0211	0.0812494	0.0121	FALSE	TRUE
CD24 on IgD+ CD38-	Alzheimer's disease	rs1007713	A	G	A	G	0.1897	4.84797e-06	0.04144	0.0103	0.2886	0.0097	FALSE	TRUE
CD24 on IgD+ CD38-	Alzheimer's disease	rs11102943	A	G	A	G	-0.1499	7.18704e-06	0.03334	-0.0017	0.8781	0.0111	FALSE	TRUE
CD24 on IgD+ CD38-	Alzheimer's disease	rs11176619	T	G	T	G	-0.2677	9.02402e-06	0.06021	0.0008	0.9785	0.0286	FALSE	TRUE
CD24 on IgD+ CD38-	Alzheimer's disease	rs11781090	T	C	T	C	0.1316	6.71104e-07	0.02643	0.0047	0.5801	0.0084	FALSE	TRUE
CD24 on IgD+ CD38-	Alzheimer's disease	rs143053604	G	A	G	A	-0.8464	2.70302e-07	0.1643	-0.0591	0.00824499	0.0224	FALSE	TRUE
CD24 on IgD+ CD38-	Alzheimer's disease	rs144378737	G	A	G	A	-2.105	3.46697e-06	0.4528	-0.0109	0.7002	0.0284	FALSE	TRUE
CD24 on IgD+ CD38-	Alzheimer's disease	rs2236073	A	G	A	G	0.1396	3.86198e-08	0.02534	-0.0019	0.8147	0.0082	FALSE	TRUE
CD24 on IgD+ CD38-	Alzheimer's disease	rs59866449	G	A	G	A	-0.2747	6.38807e-06	0.06079	-0.0075	0.665701	0.0175	FALSE	TRUE
CD24 on IgD+ CD38-	Alzheimer's disease	rs62358439	A	G	A	G	-1.053	8.69e-06	0.2364	0.0551	0.0348297	0.0261	FALSE	TRUE
CD24 on IgD+ CD38-	Alzheimer's disease	rs72782129	G	T	G	T	1.139	6.87607e-06	0.2529	0.0017	0.9462	0.0249	FALSE	TRUE
CD24 on IgD+ CD38-	Alzheimer's disease	rs75307680	G	T	G	T	0.4013	9.32911e-06	0.09042	-0.0004	0.9812	0.0154	FALSE	TRUE
CD24 on IgD+ CD38-	Alzheimer's disease	rs77154655	C	T	C	T	-0.2498	6.94305e-06	0.05549	-0.0034	0.842	0.0168	FALSE	TRUE
CD24 on IgD+ CD38-	Alzheimer's disease	rs77636548	C	T	C	T	-0.3484	2.44799e-07	0.06738	-0.0238	0.3504	0.0255	FALSE	TRUE
CD24 on IgD+ CD38-	Alzheimer's disease	rs792792	T	C	T	C	-0.1949	1.07199e-06	0.03989	0.0063	0.6694	0.0147	FALSE	TRUE
CD24 on IgD+ CD38-	Alzheimer's disease	rs8089264	T	C	T	C	0.2949	7.69201e-07	0.05956	0.0221	0.1611	0.0158	FALSE	TRUE
CD24 on IgD+ CD38-	Alzheimer's disease	rs9270560	C	T	C	T	-0.1353	7.21805e-06	0.03012	0.0184	0.0278099	0.0083	FALSE	TRUE
CD24 on IgD+ CD38-	Alzheimer's disease	rs9400058	G	A	G	A	-0.432	2.65828e-17	0.05081	0.0279	0.0704401	0.0154	FALSE	TRUE
HSC AC	Alzheimer's disease	rs10080768	T	C	T	C	0.1703	2.34202e-06	0.03596	-0.0046	0.6159	0.0091	FALSE	TRUE
HSC AC	Alzheimer's disease	rs10809987	C	T	C	T	0.2534	6.39102e-07	0.05071	-0.0304	0.0114699	0.012	FALSE	TRUE
HSC AC	Alzheimer's disease	rs112258784	G	A	G	A	-0.7371	4.75094e-06	0.1606	0.0051	0.9265	0.0548	FALSE	TRUE
HSC AC	Alzheimer's disease	rs115076910	C	T	C	T	0.1647	9.09704e-06	0.03701	-0.0245	0.0144901	0.01	FALSE	TRUE
HSC AC	Alzheimer's disease	rs115937242	A	G	A	G	1.543	2.30303e-18	0.1747	-0.0162	0.6566	0.0365	FALSE	TRUE
HSC AC	Alzheimer's disease	rs142114110	G	A	G	A	-0.4209	2.87402e-06	0.08967	0.0167	0.619001	0.0336	FALSE	TRUE
HSC AC	Alzheimer's disease	rs1432243	C	T	C	T	-0.5029	1.20099e-06	0.1032	-0.0003	0.9779	0.0116	FALSE	TRUE
HSC AC	Alzheimer's disease	rs143685973	T	C	T	C	-0.276	7.11394e-06	0.06129	-0.047	0.094879	0.0282	FALSE	TRUE
HSC AC	Alzheimer's disease	rs2709155	T	G	T	G	0.1444	8.32204e-06	0.03232	0.0025	0.7637	0.0084	FALSE	TRUE
HSC AC	Alzheimer's disease	rs2887466	T	C	T	C	0.152	3.24997e-06	0.03257	0.0077	0.3451	0.0081	FALSE	TRUE
HSC AC	Alzheimer's disease	rs34526926	A	G	A	G	-0.2775	7.82997e-06	0.0619	0.0137	0.2702	0.0125	FALSE	TRUE
HSC AC	Alzheimer's disease	rs466736	G	A	G	A	0.2384	5.95196e-06	0.0525	0.001	0.9416	0.013	FALSE	TRUE
HSC AC	Alzheimer's disease	rs6416872	C	T	C	T	0.1462	5.24505e-06	0.03201	-0.0152	0.0789805	0.0086	FALSE	TRUE
HSC AC	Alzheimer's disease	rs74529033	G	A	G	A	1.453	1.9971e-15	0.1814	0.0255	0.4221	0.0318	FALSE	TRUE
HSC AC	Alzheimer's disease	rs76038700	C	T	C	T	0.2177	1.493e-06	0.0451	0.0173	0.3298	0.0178	FALSE	TRUE
HSC AC	Alzheimer's disease	rs77058454	T	C	T	C	-1.326	1.77501e-06	0.2766	0.0329	0.2609	0.0293	FALSE	TRUE
HSC AC	Alzheimer's disease	rs80237985	A	G	A	G	0.4172	7.04596e-06	0.0926	0.0071	0.7671	0.0238	FALSE	TRUE
CCR2 on CD14+ CD16- monocyte	Alzheimer's disease	rs10081735	A	G	A	G	0.2007	1.75501e-06	0.04193	-0.0187	0.1087	0.0116	FALSE	TRUE
CCR2 on CD14+ CD16- monocyte	Alzheimer's disease	rs10878258	G	A	G	A	-0.1348	1.31899e-07	0.02549	-0.002	0.825	0.009	FALSE	TRUE
CCR2 on CD14+ CD16- monocyte	Alzheimer's disease	rs112976913	C	T	C	T	2.633	6.42599e-06	0.5828	0.0876	0.2353	0.0738	FALSE	TRUE
CCR2 on CD14+ CD16- monocyte	Alzheimer's disease	rs114744368	T	C	T	C	-0.6352	6.59599e-06	0.1408	0.0087	0.663001	0.02	FALSE	TRUE
CCR2 on CD14+ CD16- monocyte	Alzheimer's disease	rs116078872	T	G	T	G	-0.8485	9.517e-06	0.1914	-0.0092	0.616799	0.0184	FALSE	TRUE
CCR2 on CD14+ CD16- monocyte	Alzheimer's disease	rs12185230	A	G	A	G	2.962	6.409e-06	0.6555	0.0286	0.6978	0.0737	FALSE	TRUE
CCR2 on CD14+ CD16- monocyte	Alzheimer's disease	rs12613485	A	G	A	G	-0.1948	9.31794e-06	0.04389	0.0112	0.44	0.0145	FALSE	TRUE
CCR2 on CD14+ CD16- monocyte	Alzheimer's disease	rs1386098	A	G	A	G	-1.239	9.21595e-06	0.2791	0.0273	0.520701	0.0424	FALSE	TRUE
CCR2 on CD14+ CD16- monocyte	Alzheimer's disease	rs147404212	A	G	A	G	1.964	6.29796e-06	0.4343	-0.005	0.8839	0.0342	FALSE	TRUE
CCR2 on CD14+ CD16- monocyte	Alzheimer's disease	rs184445588	T	G	T	G	0.7163	4.25598e-06	0.1555	0.0344	0.4094	0.0417	FALSE	TRUE
CCR2 on CD14+ CD16- monocyte	Alzheimer's disease	rs2160337	G	T	G	T	0.1301	7.62202e-06	0.02904	0.0045	0.624901	0.0093	FALSE	TRUE
CCR2 on CD14+ CD16- monocyte	Alzheimer's disease	rs2270454	T	C	T	C	-0.2457	5.19302e-06	0.05383	0.0103	0.425	0.013	FALSE	TRUE
CCR2 on CD14+ CD16- monocyte	Alzheimer's disease	rs2426939	C	A	C	A	-0.1098	6.97204e-06	0.02439	-0.0038	0.6575	0.0086	FALSE	TRUE
CCR2 on CD14+ CD16- monocyte	Alzheimer's disease	rs2683681	A	G	A	G	0.1117	7.35394e-06	0.02488	-0.0045	0.5772	0.0081	FALSE	TRUE
CCR2 on CD14+ CD16- monocyte	Alzheimer's disease	rs4683184	A	G	A	G	0.2454	1.17004e-20	0.02618	0.0038	0.6552	0.0085	FALSE	TRUE
CCR2 on CD14+ CD16- monocyte	Alzheimer's disease	rs56407854	A	G	A	G	0.1508	4.15203e-06	0.03271	0.0117	0.2766	0.0108	FALSE	TRUE
CCR2 on CD14+ CD16- monocyte	Alzheimer's disease	rs62327180	A	G	A	G	-0.1199	8.11297e-06	0.02683	-0.0102	0.2537	0.0089	FALSE	TRUE
CCR2 on CD14+ CD16- monocyte	Alzheimer's disease	rs7000391	C	T	C	T	0.16	4.43404e-06	0.0348	0.0008	0.9482	0.0123	FALSE	TRUE
CCR2 on CD14+ CD16- monocyte	Alzheimer's disease	rs777404	A	G	A	G	2.407	1.20199e-06	0.495	0.0069	0.8291	0.0319	FALSE	TRUE
CCR2 on CD14+ CD16- monocyte	Alzheimer's disease	rs78109162	A	G	A	G	-0.2786	4.68705e-06	0.06076	-0.0175	0.3101	0.0172	FALSE	TRUE
CCR2 on CD14+ CD16- monocyte	Alzheimer's disease	rs7896883	C	T	C	T	0.1675	7.78395e-06	0.0374	-0.0011	0.909	0.0099	FALSE	TRUE
CCR2 on CD14+ CD16- monocyte	Alzheimer's disease	rs79049673	T	C	T	C	0.351	3.25402e-06	0.07529	0.0362	0.2989	0.0348	FALSE	TRUE
CCR2 on CD14+ CD16- monocyte	Alzheimer's disease	rs79825014	T	G	T	G	-0.4165	1.024e-09	0.06803	0.003	0.8808	0.0202	FALSE	TRUE
Mo MDSC AC	Alzheimer's disease	rs10176753	G	A	G	A	-0.1561	3.91201e-06	0.03371	-0.0041	0.692901	0.0104	FALSE	TRUE
Mo MDSC AC	Alzheimer's disease	rs10458377	G	A	G	A	-0.2164	3.992e-06	0.04679	-0.03	0.03359	0.0141	FALSE	TRUE
Mo MDSC AC	Alzheimer's disease	rs112611150	T	C	T	C	-0.3141	3.54797e-06	0.06753	-0.0145	0.54	0.0237	FALSE	TRUE
Mo MDSC AC	Alzheimer's disease	rs12082268	C	T	C	T	0.485	7.84693e-06	0.1082	0.0459	0.0736801	0.0256	FALSE	TRUE
Mo MDSC AC	Alzheimer's disease	rs12736179	T	C	T	C	-0.1687	2.96203e-06	0.03599	-0.0034	0.774901	0.0119	FALSE	TRUE
Mo MDSC AC	Alzheimer's disease	rs12885009	A	C	A	C	-0.1714	2.92698e-06	0.03654	0.005	0.5671	0.0088	FALSE	TRUE
Mo MDSC AC	Alzheimer's disease	rs1354106	G	T	G	T	-0.4306	1.71712e-28	0.03825	-0.0296	0.00146599	0.0093	FALSE	TRUE
Mo MDSC AC	Alzheimer's disease	rs147643522	C	T	C	T	1.28	3.62502e-06	0.2755	0.0355	0.4573	0.0477	FALSE	TRUE
Mo MDSC AC	Alzheimer's disease	rs1800973	A	C	A	C	0.3114	3.45398e-07	0.06087	0.0005	0.9763	0.0165	FALSE	TRUE
Mo MDSC AC	Alzheimer's disease	rs2071473	T	C	T	C	-0.2405	2.298e-10	0.03772	0.0175	0.0384503	0.0085	FALSE	TRUE
Mo MDSC AC	Alzheimer's disease	rs3007125	T	C	T	C	0.2011	5.40306e-06	0.04408	0.0086	0.4171	0.0106	FALSE	TRUE
Mo MDSC AC	Alzheimer's disease	rs7757733	A	G	A	G	-0.1533	3.32797e-06	0.03286	0.016	0.0569102	0.0084	FALSE	TRUE
Mo MDSC AC	Alzheimer's disease	rs78949787	T	C	T	C	0.1531	4.72096e-06	0.03336	-0.0022	0.8135	0.0094	FALSE	TRUE
Mo MDSC AC	Alzheimer's disease	rs80032720	A	G	A	G	-0.4389	4.314e-10	0.06992	-0.0133	0.6442	0.0288	FALSE	TRUE
Mo MDSC AC	Alzheimer's disease	rs9270591	T	C	T	C	0.4161	5.45632e-26	0.03887	0.019	0.0234498	0.0084	FALSE	TRUE
Mo MDSC AC	Alzheimer's disease	rs9792404	A	G	A	G	0.1972	7.76104e-06	0.04398	-0.0037	0.760001	0.0121	FALSE	TRUE
CD3 on CD8br	Alzheimer's disease	rs10083033	C	T	C	T	-0.1276	7.05895e-06	0.02835	0.0077	0.3448	0.0081	FALSE	TRUE
CD3 on CD8br	Alzheimer's disease	rs10494441	T	C	T	C	-0.372	1.84599e-07	0.07117	0.0166	0.3955	0.0195	FALSE	TRUE
CD3 on CD8br	Alzheimer's disease	rs10828773	A	G	A	G	0.1788	6.64401e-06	0.03962	0.0103	0.384	0.0118	FALSE	TRUE
CD3 on CD8br	Alzheimer's disease	rs116757920	A	G	A	G	0.4338	1.83e-06	0.09072	0.0359	0.3347	0.0372	FALSE	TRUE
CD3 on CD8br	Alzheimer's disease	rs12144916	G	A	G	A	0.1391	1.05499e-06	0.02844	0.0048	0.569399	0.0084	FALSE	TRUE
CD3 on CD8br	Alzheimer's disease	rs12476279	A	G	A	G	0.2098	9.82607e-06	0.04738	-0.0346	0.08425	0.02	FALSE	TRUE
CD3 on CD8br	Alzheimer's disease	rs140965084	T	C	T	C	0.502	8.05805e-06	0.1123	-0.0071	0.8144	0.0303	FALSE	TRUE
CD3 on CD8br	Alzheimer's disease	rs142477005	T	C	T	C	-0.5191	9.7681e-06	0.1172	0.0319	0.3317	0.0329	FALSE	TRUE
CD3 on CD8br	Alzheimer's disease	rs143008344	T	C	T	C	-0.3355	7.57304e-06	0.07481	0.0487	0.0513902	0.025	FALSE	TRUE
CD3 on CD8br	Alzheimer's disease	rs1529714	A	G	A	G	-0.1362	5.00196e-06	0.02978	0.0048	0.6244	0.0099	FALSE	TRUE
CD3 on CD8br	Alzheimer's disease	rs1723018	G	A	G	A	0.4112	6.13479e-53	0.02631	0.0183	0.0292503	0.0084	FALSE	TRUE
CD3 on CD8br	Alzheimer's disease	rs188662274	G	A	G	A	-0.354	2.334e-06	0.07482	0.0159	0.7	0.0411	FALSE	TRUE
CD3 on CD8br	Alzheimer's disease	rs61916018	T	C	T	C	0.1677	8.99891e-06	0.0377	0.0021	0.8567	0.0118	FALSE	TRUE
CD3 on CD8br	Alzheimer's disease	rs6479155	C	T	C	T	-0.1407	1.53699e-07	0.02675	-0.0085	0.2962	0.0081	FALSE	TRUE
CD3 on CD8br	Alzheimer's disease	rs71381322	A	G	A	G	1.538	8.94293e-07	0.3123	-0.0076	0.757501	0.0245	FALSE	TRUE
CD3 on CD8br	Alzheimer's disease	rs7174332	A	G	A	G	0.1302	9.66496e-06	0.02936	0.0104	0.2474	0.009	FALSE	TRUE
CD3 on CD8br	Alzheimer's disease	rs7203336	T	C	T	C	-0.1322	6.24899e-06	0.0292	-0.004	0.6443	0.0087	FALSE	TRUE
CD3 on CD8br	Alzheimer's disease	rs75572339	A	G	A	G	0.2834	9.37303e-07	0.05767	-0.0108	0.5339	0.0174	FALSE	TRUE
CD3 on CD8br	Alzheimer's disease	rs76066554	T	C	T	C	-0.9878	7.36105e-06	0.2199	-0.0287	0.4956	0.0422	FALSE	TRUE
CD3 on CD8br	Alzheimer's disease	rs76757975	A	C	A	C	1.193	3.64998e-06	0.2571	0.0538	0.0528603	0.0278	FALSE	TRUE
CD3 on CD8br	Alzheimer's disease	rs858545	C	A	C	A	-0.1746	1.83101e-10	0.02729	0.0023	0.8021	0.0092	FALSE	TRUE
CD8br NKT AC	Alzheimer's disease	rs1008425	G	A	G	A	0.1228	8.19993e-06	0.0275	-0.0191	0.0495701	0.0097	FALSE	TRUE
CD8br NKT AC	Alzheimer's disease	rs1077381	T	C	T	C	0.1155	6.03198e-06	0.02547	0.0065	0.4261	0.0082	FALSE	TRUE
CD8br NKT AC	Alzheimer's disease	rs115889733	A	G	A	G	0.2065	9.21298e-06	0.04649	0.0044	0.7997	0.0175	FALSE	TRUE
CD8br NKT AC	Alzheimer's disease	rs11658693	G	A	G	A	-0.2038	2.84499e-07	0.03962	-0.0135	0.3615	0.0148	FALSE	TRUE
CD8br NKT AC	Alzheimer's disease	rs117122100	T	C	T	C	-0.4686	6.62796e-06	0.1039	0.013	0.7009	0.0338	FALSE	TRUE
CD8br NKT AC	Alzheimer's disease	rs12422853	A	G	A	G	0.1113	8.02602e-06	0.02489	-0.0028	0.729699	0.0082	FALSE	TRUE
CD8br NKT AC	Alzheimer's disease	rs12792298	T	C	T	C	-0.3155	2.30298e-06	0.06667	-0.0411	0.2106	0.0328	FALSE	TRUE
CD8br NKT AC	Alzheimer's disease	rs12940345	T	C	T	C	0.1138	4.33102e-06	0.02473	0.0053	0.5181	0.0082	FALSE	TRUE
CD8br NKT AC	Alzheimer's disease	rs1325907	A	G	A	G	-0.1298	4.72803e-07	0.02573	0.0018	0.824	0.0082	FALSE	TRUE
CD8br NKT AC	Alzheimer's disease	rs144156455	C	T	C	T	0.3176	2.48897e-06	0.06734	0.0297	0.3189	0.0298	FALSE	TRUE
CD8br NKT AC	Alzheimer's disease	rs17448682	T	C	T	C	0.142	5.89794e-06	0.0313	0.0102	0.2855	0.0096	FALSE	TRUE
CD8br NKT AC	Alzheimer's disease	rs2074023	T	C	T	C	-0.1237	6.76099e-07	0.02486	-0.0022	0.7982	0.0084	FALSE	TRUE
CD8br NKT AC	Alzheimer's disease	rs34575510	T	C	T	C	0.2742	2.03002e-06	0.05762	-0.0132	0.4188	0.0164	FALSE	TRUE
CD8br NKT AC	Alzheimer's disease	rs4235317	T	C	T	C	-0.1251	4.31897e-06	0.02718	-0.006	0.540201	0.0099	FALSE	TRUE
CD8br NKT AC	Alzheimer's disease	rs4745010	G	A	G	A	0.1325	1.34602e-06	0.02737	-0.0015	0.9066	0.0127	FALSE	TRUE
CD8br NKT AC	Alzheimer's disease	rs593435	T	C	T	C	0.1122	7.24903e-06	0.02497	-0.0019	0.8175	0.0082	FALSE	TRUE
CD8br NKT AC	Alzheimer's disease	rs60553229	A	G	A	G	-1.538	1.59801e-06	0.32	0.0304	0.5202	0.0472	FALSE	TRUE
CD8br NKT AC	Alzheimer's disease	rs61944019	A	G	A	G	-0.7438	5.96197e-06	0.164	-0.0105	0.6389	0.0224	FALSE	TRUE
CD8br NKT AC	Alzheimer's disease	rs7003580	T	C	T	C	0.1169	2.88802e-06	0.02495	0.0189	0.0231798	0.0083	FALSE	TRUE
CD8br NKT AC	Alzheimer's disease	rs73109444	T	C	T	C	0.34	6.01395e-06	0.075	0.0116	0.5652	0.0201	FALSE	TRUE
CD8br NKT AC	Alzheimer's disease	rs7756993	C	T	C	T	-0.1338	2.95699e-06	0.02858	0.0332	0.000408799	0.0094	FALSE	TRUE
CD8br NKT AC	Alzheimer's disease	rs78099351	C	A	C	A	0.3468	5.35402e-06	0.0761	0.0473	0.03755	0.0227	FALSE	TRUE
CD8br NKT AC	Alzheimer's disease	rs78268116	T	C	T	C	-0.3964	4.6505e-24	0.0389	-0.0264	0.2237	0.0217	FALSE	TRUE
CD8br NKT AC	Alzheimer's disease	rs9269109	C	T	C	T	0.1671	3.31398e-08	0.03018	-0.0289	0.000880805	0.0087	FALSE	TRUE
CD39+ resting Treg % CD4 Treg	Alzheimer's disease	rs10086961	C	T	C	T	-0.1275	3.29602e-06	0.02736	-0.0053	0.5313	0.0085	FALSE	TRUE
CD39+ resting Treg % CD4 Treg	Alzheimer's disease	rs111534725	T	G	T	G	0.8056	1.05512e-36	0.06291	0.0204	0.6637	0.047	FALSE	TRUE
CD39+ resting Treg % CD4 Treg	Alzheimer's disease	rs113264169	T	C	T	C	0.2772	9.87006e-06	0.06262	0.0725	0.0451004	0.0362	FALSE	TRUE
CD39+ resting Treg % CD4 Treg	Alzheimer's disease	rs113435341	G	A	G	A	2.267	3.79315e-25	0.2171	0.0595	0.0724403	0.0331	FALSE	TRUE
CD39+ resting Treg % CD4 Treg	Alzheimer's disease	rs11579717	A	G	A	G	1.718	1.35114e-20	0.1835	0.0488	0.0161102	0.0203	FALSE	TRUE
CD39+ resting Treg % CD4 Treg	Alzheimer's disease	rs115977640	A	C	A	C	0.6189	3.82904e-06	0.1337	0.0504	0.0719797	0.028	FALSE	TRUE
CD39+ resting Treg % CD4 Treg	Alzheimer's disease	rs116794175	C	T	C	T	1.311	6.98232e-12	0.1905	0.041	0.573099	0.0728	FALSE	TRUE
CD39+ resting Treg % CD4 Treg	Alzheimer's disease	rs117572834	G	T	G	T	-1.108	2.25299e-07	0.2135	0.0042	0.927	0.0455	FALSE	TRUE
CD39+ resting Treg % CD4 Treg	Alzheimer's disease	rs11818051	T	C	T	C	0.6998	4.23741e-22	0.0719	0.0484	0.1999	0.0377	FALSE	TRUE
CD39+ resting Treg % CD4 Treg	Alzheimer's disease	rs11890666	A	G	A	G	-0.1612	7.94292e-09	0.02787	0.013	0.1942	0.01	FALSE	TRUE
CD39+ resting Treg % CD4 Treg	Alzheimer's disease	rs12518588	G	T	G	T	0.1241	9.15398e-07	0.02523	-0.0014	0.8604	0.0081	FALSE	TRUE
CD39+ resting Treg % CD4 Treg	Alzheimer's disease	rs12712610	G	A	G	A	0.201	1.82684e-13	0.02719	0.0079	0.4662	0.0108	FALSE	TRUE
CD39+ resting Treg % CD4 Treg	Alzheimer's disease	rs12778837	C	T	C	T	0.1965	1.5531e-13	0.02651	-0.0146	0.0838803	0.0085	FALSE	TRUE
CD39+ resting Treg % CD4 Treg	Alzheimer's disease	rs1410600	T	C	T	C	-0.2216	3.58922e-18	0.02536	0.01	0.2152	0.0081	FALSE	TRUE
CD39+ resting Treg % CD4 Treg	Alzheimer's disease	rs150956189	C	T	C	T	2.837	5.74196e-06	0.6244	0.0346	0.2794	0.032	FALSE	TRUE
CD39+ resting Treg % CD4 Treg	Alzheimer's disease	rs17111341	C	T	C	T	0.6853	1.85909e-41	0.05013	-0.0263	0.2765	0.0242	FALSE	TRUE
CD39+ resting Treg % CD4 Treg	Alzheimer's disease	rs182702572	A	C	A	C	0.5464	1.95119e-13	0.07402	-0.0527	0.1791	0.0392	FALSE	TRUE
CD39+ resting Treg % CD4 Treg	Alzheimer's disease	rs187089343	C	A	C	A	0.8819	2.31702e-06	0.1864	-0.006	0.9293	0.0676	FALSE	TRUE
CD39+ resting Treg % CD4 Treg	Alzheimer's disease	rs2326054	C	T	C	T	-0.2311	3.34503e-06	0.04963	-0.0106	0.402	0.0126	FALSE	TRUE
CD39+ resting Treg % CD4 Treg	Alzheimer's disease	rs34645541	A	C	A	C	0.7843	1.293e-09	0.1289	0.0602	0.03535	0.0286	FALSE	TRUE
CD39+ resting Treg % CD4 Treg	Alzheimer's disease	rs35909109	T	C	T	C	0.3811	2.29901e-10	0.05993	-0.0484	0.0483203	0.0245	FALSE	TRUE
CD39+ resting Treg % CD4 Treg	Alzheimer's disease	rs4918969	A	G	A	G	0.8426	1e-200	0.02078	0.0156	0.05365	0.0081	FALSE	TRUE
CD39+ resting Treg % CD4 Treg	Alzheimer's disease	rs5755717	C	A	C	A	0.1309	9.80799e-06	0.02956	-0.0019	0.8382	0.0091	FALSE	TRUE
CD39+ resting Treg % CD4 Treg	Alzheimer's disease	rs7310854	C	T	C	T	0.1246	7.79704e-06	0.02782	-0.0041	0.6772	0.0099	FALSE	TRUE
CD39+ resting Treg % CD4 Treg	Alzheimer's disease	rs77520132	A	G	A	G	0.6067	4.4412e-25	0.05819	0.0639	0.0587706	0.0338	FALSE	TRUE
CD39+ resting Treg % CD4 Treg	Alzheimer's disease	rs78096816	C	A	C	A	1.581	1.46599e-06	0.3277	0.0122	0.5954	0.0229	FALSE	TRUE
CD39+ resting Treg % CD4 Treg	Alzheimer's disease	rs78809247	T	C	T	C	-0.3668	6.37397e-06	0.08113	0.0136	0.5759	0.0243	FALSE	TRUE
CD39+ resting Treg % CD4 Treg	Alzheimer's disease	rs78843390	T	C	T	C	0.6146	2.17701e-06	0.1296	-0.0097	0.7621	0.0321	FALSE	TRUE
CD39+ resting Treg % CD4 Treg	Alzheimer's disease	rs7963011	T	C	T	C	0.1209	9.08699e-06	0.02721	-0.0068	0.4474	0.009	FALSE	TRUE
CD39+ resting Treg % CD4 Treg	Alzheimer's disease	rs884599	G	A	G	A	-0.1114	6.844e-06	0.02473	-0.0146	0.0951108	0.0087	FALSE	TRUE
CD39+ resting Treg AC	Alzheimer's disease	rs10086961	C	T	C	T	-0.1276	4.09902e-06	0.02767	-0.0053	0.5313	0.0085	FALSE	TRUE
CD39+ resting Treg AC	Alzheimer's disease	rs111534725	T	G	T	G	0.7719	3.05703e-33	0.06357	0.0204	0.6637	0.047	FALSE	TRUE
CD39+ resting Treg AC	Alzheimer's disease	rs11718018	C	T	C	T	-0.1138	7.22005e-06	0.02532	0.0098	0.2448	0.0084	FALSE	TRUE
CD39+ resting Treg AC	Alzheimer's disease	rs117572834	G	T	G	T	-1.021	1.82802e-06	0.2137	0.0042	0.927	0.0455	FALSE	TRUE
CD39+ resting Treg AC	Alzheimer's disease	rs117678654	A	C	A	C	0.6017	6.32397e-07	0.1206	0.0392	0.1995	0.0305	FALSE	TRUE
CD39+ resting Treg AC	Alzheimer's disease	rs11890666	A	G	A	G	-0.1566	2.88403e-08	0.02815	0.013	0.1942	0.01	FALSE	TRUE
CD39+ resting Treg AC	Alzheimer's disease	rs12712610	G	A	G	A	0.1912	4.16486e-12	0.02749	0.0079	0.4662	0.0108	FALSE	TRUE
CD39+ resting Treg AC	Alzheimer's disease	rs138915779	A	C	A	C	1.188	1.88899e-07	0.2275	0.0334	0.2641	0.0299	FALSE	TRUE
CD39+ resting Treg AC	Alzheimer's disease	rs143132810	C	T	C	T	0.6358	1.06709e-15	0.0789	-0.0363	0.2489	0.0315	FALSE	TRUE
CD39+ resting Treg AC	Alzheimer's disease	rs146899923	C	T	C	T	0.8565	4.292e-10	0.1368	0.0481	0.1254	0.0314	FALSE	TRUE
CD39+ resting Treg AC	Alzheimer's disease	rs17583875	A	G	A	G	2.134	2.16721e-21	0.2233	0.0141	0.6304	0.0293	FALSE	TRUE
CD39+ resting Treg AC	Alzheimer's disease	rs185474383	T	G	T	G	0.5292	1.096e-09	0.08658	-0.0184	0.534399	0.0296	FALSE	TRUE
CD39+ resting Treg AC	Alzheimer's disease	rs187089343	C	A	C	A	0.855	5.21795e-06	0.1874	-0.006	0.9293	0.0676	FALSE	TRUE
CD39+ resting Treg AC	Alzheimer's disease	rs190023756	A	G	A	G	0.6136	4.23701e-07	0.1211	0.0118	0.5157	0.0181	FALSE	TRUE
CD39+ resting Treg AC	Alzheimer's disease	rs2326054	C	T	C	T	-0.2253	7.27294e-06	0.05016	-0.0106	0.402	0.0126	FALSE	TRUE
CD39+ resting Treg AC	Alzheimer's disease	rs35909109	T	C	T	C	0.3601	3.22203e-09	0.06066	-0.0484	0.0483203	0.0245	FALSE	TRUE
CD39+ resting Treg AC	Alzheimer's disease	rs4321083	A	G	A	G	0.1371	8.24005e-06	0.03069	0.005	0.590999	0.0094	FALSE	TRUE
CD39+ resting Treg AC	Alzheimer's disease	rs56158191	T	C	T	C	-0.3521	8.18691e-06	0.07883	0.0283	0.2076	0.0225	FALSE	TRUE
CD39+ resting Treg AC	Alzheimer's disease	rs62421103	T	G	T	G	0.2238	5.77497e-06	0.04927	-0.007	0.6863	0.0173	FALSE	TRUE
CD39+ resting Treg AC	Alzheimer's disease	rs6488275	T	C	T	C	-0.1716	4.55795e-06	0.03738	-0.0013	0.9365	0.0157	FALSE	TRUE
CD39+ resting Treg AC	Alzheimer's disease	rs7079761	A	G	A	G	0.7212	3.74542e-37	0.05595	0.0124	0.685799	0.0307	FALSE	TRUE
CD39+ resting Treg AC	Alzheimer's disease	rs72809762	T	C	T	C	0.4336	3.04299e-18	0.04951	0.0054	0.7979	0.021	FALSE	TRUE
CD39+ resting Treg AC	Alzheimer's disease	rs77520132	A	G	A	G	0.5828	1.02896e-22	0.05899	0.0639	0.0587706	0.0338	FALSE	TRUE
CD39+ resting Treg AC	Alzheimer's disease	rs78096816	C	A	C	A	1.521	3.84698e-06	0.3287	0.0122	0.5954	0.0229	FALSE	TRUE
CD39+ resting Treg AC	Alzheimer's disease	rs78843390	T	C	T	C	0.6066	3.28799e-06	0.1302	-0.0097	0.7621	0.0321	FALSE	TRUE
CD127 on CD45RA+ CD4+	Alzheimer's disease	rs10089520	C	T	C	T	-0.18	6.23103e-06	0.03977	0.0048	0.6438	0.0104	FALSE	TRUE
CD127 on CD45RA+ CD4+	Alzheimer's disease	rs115564010	A	C	A	C	0.4829	3.69199e-06	0.1041	0.0153	0.5061	0.023	FALSE	TRUE
CD127 on CD45RA+ CD4+	Alzheimer's disease	rs138540869	T	C	T	C	0.3883	4.27898e-06	0.0843	0.0189	0.5852	0.0347	FALSE	TRUE
CD127 on CD45RA+ CD4+	Alzheimer's disease	rs140742144	T	C	T	C	0.5687	7.76909e-06	0.127	-0.0347	0.0453597	0.0174	FALSE	TRUE
CD127 on CD45RA+ CD4+	Alzheimer's disease	rs144125132	C	T	C	T	0.468	8.01807e-06	0.1046	-0.0475	0.1361	0.0319	FALSE	TRUE
CD127 on CD45RA+ CD4+	Alzheimer's disease	rs1573735	T	C	T	C	-0.2069	4.01976e-13	0.02839	-0.0244	0.00291998	0.0082	FALSE	TRUE
CD127 on CD45RA+ CD4+	Alzheimer's disease	rs180717968	G	A	G	A	0.4525	1.25701e-06	0.09317	0.017	0.6271	0.0349	FALSE	TRUE
CD127 on CD45RA+ CD4+	Alzheimer's disease	rs2059578	C	T	C	T	-0.3878	6.61104e-06	0.0859	0.0498	0.02524	0.0223	FALSE	TRUE
CD127 on CD45RA+ CD4+	Alzheimer's disease	rs3129891	A	G	A	G	-0.2373	5.8776e-12	0.03434	-0.0198	0.05236	0.0102	FALSE	TRUE
CD127 on CD45RA+ CD4+	Alzheimer's disease	rs34285518	C	T	C	T	-0.1501	5.55201e-06	0.03299	0.0087	0.3088	0.0085	FALSE	TRUE
CD127 on CD45RA+ CD4+	Alzheimer's disease	rs6571878	C	T	C	T	0.2105	4.92402e-06	0.046	0.0159	0.1615	0.0113	FALSE	TRUE
CD127 on CD45RA+ CD4+	Alzheimer's disease	rs6691053	T	C	T	C	0.1437	7.67998e-06	0.03207	-0.0083	0.4002	0.0099	FALSE	TRUE
CD127 on CD45RA+ CD4+	Alzheimer's disease	rs67627362	G	A	G	A	-0.2003	7.29995e-06	0.04459	0.0141	0.2555	0.0124	FALSE	TRUE
CD127 on CD45RA+ CD4+	Alzheimer's disease	rs7046475	C	T	C	T	0.1729	9.31494e-06	0.03894	-0.0118	0.2415	0.01	FALSE	TRUE
CD127 on CD45RA+ CD4+	Alzheimer's disease	rs7115390	C	T	C	T	0.1814	7.26892e-06	0.04036	-0.0076	0.4998	0.0113	FALSE	TRUE
CD127 on CD45RA+ CD4+	Alzheimer's disease	rs7264992	T	C	T	C	-0.1261	4.948e-06	0.02755	-0.0019	0.8159	0.0083	FALSE	TRUE
CD127 on CD45RA+ CD4+	Alzheimer's disease	rs76683776	C	T	C	T	-0.8253	9.72994e-06	0.1863	0.005	0.8337	0.0238	FALSE	TRUE
CD127 on CD45RA+ CD4+	Alzheimer's disease	rs9271772	A	G	A	G	0.2608	2.23409e-13	0.0354	-0.0199	0.0626397	0.0107	FALSE	TRUE
CD127 on CD45RA+ CD4+	Alzheimer's disease	rs930760	T	C	T	C	0.129	3.94403e-06	0.02791	0.0068	0.4273	0.0086	FALSE	TRUE
HVEM on naive CD8br	Alzheimer's disease	rs10090960	G	A	G	A	-0.1865	3.81804e-06	0.04018	-0.0338	4.66402e-05	0.0083	FALSE	TRUE
HVEM on naive CD8br	Alzheimer's disease	rs112421400	T	C	T	C	-0.2471	4.47003e-06	0.05362	0.0688	0.000390499	0.0194	FALSE	TRUE
HVEM on naive CD8br	Alzheimer's disease	rs118151702	T	C	T	C	0.4464	4.292e-06	0.09669	-0.0035	0.8608	0.0199	FALSE	TRUE
HVEM on naive CD8br	Alzheimer's disease	rs11981290	A	G	A	G	-0.2026	4.27602e-06	0.04387	-0.0166	0.0696402	0.0091	FALSE	TRUE
HVEM on naive CD8br	Alzheimer's disease	rs12476985	C	T	C	T	0.8901	5.90799e-06	0.1957	0.0202	0.4036	0.0242	FALSE	TRUE
HVEM on naive CD8br	Alzheimer's disease	rs1353750	C	T	C	T	-0.3769	6.50894e-06	0.08324	-0.012	0.3011	0.0116	FALSE	TRUE
HVEM on naive CD8br	Alzheimer's disease	rs144299393	A	G	A	G	-2.807	3.50598e-06	0.6024	-0.0019	0.9667	0.0467	FALSE	TRUE
HVEM on naive CD8br	Alzheimer's disease	rs17105684	A	G	A	G	-0.4536	4.98104e-06	0.09893	-0.0142	0.554799	0.024	FALSE	TRUE
HVEM on naive CD8br	Alzheimer's disease	rs17532418	A	C	A	C	1.399	2.13998e-06	0.2937	-0.0064	0.8142	0.027	FALSE	TRUE
HVEM on naive CD8br	Alzheimer's disease	rs2234161	T	C	T	C	0.2305	4.24502e-09	0.03896	0.0105	0.1994	0.0082	FALSE	TRUE
HVEM on naive CD8br	Alzheimer's disease	rs2523589	T	G	T	G	0.2311	7.34801e-08	0.04267	-0.0002	0.9779	0.0081	FALSE	TRUE
HVEM on naive CD8br	Alzheimer's disease	rs28422844	G	A	G	A	0.5661	5.44804e-06	0.124	0.0731	0.00410497	0.0255	FALSE	TRUE
HVEM on naive CD8br	Alzheimer's disease	rs2844594	A	G	A	G	-0.276	2.44202e-10	0.04325	-0.0153	0.1392	0.0103	FALSE	TRUE
HVEM on naive CD8br	Alzheimer's disease	rs28904611	G	A	G	A	0.4581	2.031e-06	0.09597	0.0298	0.1578	0.0211	FALSE	TRUE
HVEM on naive CD8br	Alzheimer's disease	rs2964678	T	C	T	C	-0.29	1.26e-06	0.05954	0.0028	0.788	0.0105	FALSE	TRUE
HVEM on naive CD8br	Alzheimer's disease	rs4898532	C	T	C	T	-0.1882	2.92698e-06	0.04006	0.0158	0.0531496	0.0082	FALSE	TRUE
HVEM on naive CD8br	Alzheimer's disease	rs561768	G	A	G	A	-0.1931	4.40697e-06	0.04187	-0.0072	0.4579	0.0097	FALSE	TRUE
HVEM on naive CD8br	Alzheimer's disease	rs73851787	G	A	G	A	0.5851	8.51491e-06	0.1309	-0.0271	0.1068	0.0168	FALSE	TRUE
HVEM on CD8br	Alzheimer's disease	rs10090960	G	A	G	A	-0.1987	9.11108e-07	0.04027	-0.0338	4.66402e-05	0.0083	FALSE	TRUE
HVEM on CD8br	Alzheimer's disease	rs10508717	A	G	A	G	-0.1852	5.83902e-06	0.04069	-0.0056	0.5002	0.0083	FALSE	TRUE
HVEM on CD8br	Alzheimer's disease	rs117761782	T	G	T	G	-0.4141	9.10794e-06	0.09294	0.0124	0.6062	0.0241	FALSE	TRUE
HVEM on CD8br	Alzheimer's disease	rs16834073	C	T	C	T	-0.5241	3.48899e-07	0.1023	-0.0416	0.0319301	0.0194	FALSE	TRUE
HVEM on CD8br	Alzheimer's disease	rs182735817	A	G	A	G	0.6466	9.97103e-06	0.1458	0.0289	0.3881	0.0334	FALSE	TRUE
HVEM on CD8br	Alzheimer's disease	rs2219729	C	T	C	T	-0.192	9.06004e-06	0.04308	0.0023	0.8014	0.009	FALSE	TRUE
HVEM on CD8br	Alzheimer's disease	rs2227313	C	T	C	T	0.2584	4.89892e-11	0.03896	0.0125	0.1257	0.0082	FALSE	TRUE
HVEM on CD8br	Alzheimer's disease	rs2338998	C	T	C	T	0.2289	1.38701e-07	0.04321	-0.0098	0.2621	0.0087	FALSE	TRUE
HVEM on CD8br	Alzheimer's disease	rs35211801	T	C	T	C	1.214	8.27999e-06	0.2711	0.0364	0.3798	0.0414	FALSE	TRUE
HVEM on CD8br	Alzheimer's disease	rs61731213	A	G	A	G	1.062	5.26502e-06	0.2322	0.0347	0.2987	0.0334	FALSE	TRUE
HVEM on CD8br	Alzheimer's disease	rs7210730	A	G	A	G	0.2024	6.94001e-06	0.04484	0.0015	0.8703	0.0092	FALSE	TRUE
HVEM on CD8br	Alzheimer's disease	rs75214693	T	C	T	C	-0.4794	1.78501e-06	0.09988	0.0192	0.5042	0.0288	FALSE	TRUE
HVEM on CD8br	Alzheimer's disease	rs9267111	G	A	G	A	-0.2692	2.44298e-06	0.05685	-0.0139	0.1269	0.0091	FALSE	TRUE
HVEM on CD8br	Alzheimer's disease	rs9966806	T	C	T	C	0.1769	9.31301e-06	0.03974	0.0023	0.7894	0.0086	FALSE	TRUE
CD8 on CD28+ CD45RA+ CD8br	Alzheimer's disease	rs10091979	A	G	A	G	0.1235	6.02504e-06	0.02724	0.0105	0.2165	0.0085	FALSE	TRUE
CD8 on CD28+ CD45RA+ CD8br	Alzheimer's disease	rs10205992	T	C	T	C	-0.2955	2.99778e-28	0.02653	0.0005	0.9505	0.0088	FALSE	TRUE
CD8 on CD28+ CD45RA+ CD8br	Alzheimer's disease	rs1264570	T	C	T	C	0.1984	1.417e-09	0.03266	0.0204	0.0152598	0.0084	FALSE	TRUE
CD8 on CD28+ CD45RA+ CD8br	Alzheimer's disease	rs12660712	A	C	A	C	-0.2799	1.15401e-08	0.04891	-0.0021	0.9277	0.0237	FALSE	TRUE
CD8 on CD28+ CD45RA+ CD8br	Alzheimer's disease	rs130065	A	G	A	G	-0.3127	1.41906e-14	0.04043	0.0142	0.1595	0.0101	FALSE	TRUE
CD8 on CD28+ CD45RA+ CD8br	Alzheimer's disease	rs13024436	A	G	A	G	0.1591	1.07599e-08	0.02774	-0.0163	0.0494698	0.0083	FALSE	TRUE
CD8 on CD28+ CD45RA+ CD8br	Alzheimer's disease	rs1356625	C	T	C	T	0.192	1.36616e-12	0.02696	0.0129	0.1284	0.0085	FALSE	TRUE
CD8 on CD28+ CD45RA+ CD8br	Alzheimer's disease	rs141200631	G	T	G	T	0.9591	4.55795e-06	0.2088	0.0091	0.7935	0.0349	FALSE	TRUE
CD8 on CD28+ CD45RA+ CD8br	Alzheimer's disease	rs149943125	C	A	C	A	-0.9617	1.13099e-07	0.1808	0.009	0.8245	0.0404	FALSE	TRUE
CD8 on CD28+ CD45RA+ CD8br	Alzheimer's disease	rs184303531	A	G	A	G	0.7048	9.28496e-06	0.1587	-0.004	0.9156	0.0381	FALSE	TRUE
CD8 on CD28+ CD45RA+ CD8br	Alzheimer's disease	rs191051785	G	A	G	A	-1.157	3.56697e-06	0.2492	0.0336	0.3047	0.0327	FALSE	TRUE
CD8 on CD28+ CD45RA+ CD8br	Alzheimer's disease	rs201585667	C	A	C	A	-0.1903	5.88505e-06	0.04192	0.0227	0.0578895	0.012	FALSE	TRUE
CD8 on CD28+ CD45RA+ CD8br	Alzheimer's disease	rs28747043	G	A	G	A	-0.1487	5.43e-06	0.03265	0.0206	0.0304397	0.0095	FALSE	TRUE
CD8 on CD28+ CD45RA+ CD8br	Alzheimer's disease	rs404977	G	A	G	A	0.1277	4.84395e-06	0.02788	0.0031	0.724399	0.0087	FALSE	TRUE
CD8 on CD28+ CD45RA+ CD8br	Alzheimer's disease	rs517004	T	G	T	G	0.5458	7.40099e-06	0.1216	-0.0196	0.2726	0.0178	FALSE	TRUE
CD8 on CD28+ CD45RA+ CD8br	Alzheimer's disease	rs56250120	T	C	T	C	0.1266	3.56e-06	0.02726	0.0015	0.8693	0.0092	FALSE	TRUE
CD8 on CD28+ CD45RA+ CD8br	Alzheimer's disease	rs58853189	A	G	A	G	0.1515	9.72389e-06	0.03419	0.0131	0.3054	0.0128	FALSE	TRUE
CD8 on CD28+ CD45RA+ CD8br	Alzheimer's disease	rs6903896	A	G	A	G	-0.3411	1.49314e-13	0.04595	0.0167	0.4754	0.0233	FALSE	TRUE
CD8 on CD28+ CD45RA+ CD8br	Alzheimer's disease	rs76872865	G	A	G	A	0.1866	5.01996e-06	0.04082	0.0042	0.730801	0.0122	FALSE	TRUE
CD8 on CD28+ CD45RA+ CD8br	Alzheimer's disease	rs7935549	T	C	T	C	-0.1271	5.55994e-06	0.02792	0.014	0.0989305	0.0085	FALSE	TRUE
CD8 on CD28+ CD45RA+ CD8br	Alzheimer's disease	rs80190728	G	A	G	A	-0.4219	6.43206e-06	0.09333	-0.0312	0.2434	0.0268	FALSE	TRUE
CD8 on CD28+ CD45RA+ CD8br	Alzheimer's disease	rs938487	G	A	G	A	-0.5168	2.91072e-65	0.02954	-0.0187	0.0227599	0.0082	FALSE	TRUE
IgD+ CD38br %lymphocyte	Alzheimer's disease	rs10103048	C	A	C	A	0.126	2.988e-06	0.02692	0.0081	0.3294	0.0083	FALSE	TRUE
IgD+ CD38br %lymphocyte	Alzheimer's disease	rs10821937	T	C	T	C	-0.116	5.66304e-06	0.02553	-0.003	0.7293	0.0086	FALSE	TRUE
IgD+ CD38br %lymphocyte	Alzheimer's disease	rs10832409	A	G	A	G	0.1495	3.73603e-06	0.03227	0.0143	0.1552	0.01	FALSE	TRUE
IgD+ CD38br %lymphocyte	Alzheimer's disease	rs11068290	T	C	T	C	0.3875	1.08901e-06	0.07937	0.021	0.5369	0.034	FALSE	TRUE
IgD+ CD38br %lymphocyte	Alzheimer's disease	rs11185560	A	G	A	G	-0.2347	2.95597e-06	0.05014	-0.0402	0.0779094	0.0228	FALSE	TRUE
IgD+ CD38br %lymphocyte	Alzheimer's disease	rs11682311	C	T	C	T	-0.1278	9.105e-07	0.02599	-0.0091	0.2776	0.0084	FALSE	TRUE
IgD+ CD38br %lymphocyte	Alzheimer's disease	rs140380950	C	T	C	T	-0.3597	2.067e-08	0.06402	0.0342	0.3292	0.0351	FALSE	TRUE
IgD+ CD38br %lymphocyte	Alzheimer's disease	rs1695681	A	C	A	C	-0.1213	7.75908e-07	0.02451	0.0031	0.7061	0.0082	FALSE	TRUE
IgD+ CD38br %lymphocyte	Alzheimer's disease	rs17408660	G	A	G	A	-0.4731	7.92501e-06	0.1058	-0.0201	0.337	0.0209	FALSE	TRUE
IgD+ CD38br %lymphocyte	Alzheimer's disease	rs1919856	G	A	G	A	0.1734	5.72506e-06	0.03817	0.0425	0.002714	0.0142	FALSE	TRUE
IgD+ CD38br %lymphocyte	Alzheimer's disease	rs2216762	C	T	C	T	-0.1525	8.88403e-07	0.03097	-0.0243	0.0349599	0.0115	FALSE	TRUE
IgD+ CD38br %lymphocyte	Alzheimer's disease	rs2686423	G	A	G	A	0.3352	6.66807e-06	0.07432	0.001	0.9503	0.0166	FALSE	TRUE
IgD+ CD38br %lymphocyte	Alzheimer's disease	rs2857599	A	G	A	G	-0.1653	6.07393e-06	0.03649	-0.0258	0.0205698	0.0112	FALSE	TRUE
IgD+ CD38br %lymphocyte	Alzheimer's disease	rs4907205	C	T	C	T	-0.1658	9.60395e-06	0.03741	0.0206	0.0501499	0.0105	FALSE	TRUE
IgD+ CD38br %lymphocyte	Alzheimer's disease	rs55708924	G	A	G	A	-0.3886	8.58796e-06	0.0872	-0.0303	0.4079	0.0366	FALSE	TRUE
IgD+ CD38br %lymphocyte	Alzheimer's disease	rs59879144	A	C	A	C	-0.4624	1.88599e-06	0.09688	-0.0038	0.8653	0.0222	FALSE	TRUE
IgD+ CD38br %lymphocyte	Alzheimer's disease	rs60521331	A	G	A	G	0.1158	1.86299e-06	0.02425	-0.0016	0.8437	0.0082	FALSE	TRUE
IgD+ CD38br %lymphocyte	Alzheimer's disease	rs75589249	T	C	T	C	-0.5382	7.06708e-06	0.1197	0.0293	0.1746	0.0215	FALSE	TRUE
IgD+ CD38br %lymphocyte	Alzheimer's disease	rs76112278	A	G	A	G	-0.4243	1.25901e-06	0.08741	-0.0223	0.5384	0.0363	FALSE	TRUE
IgD+ CD38br %lymphocyte	Alzheimer's disease	rs76660971	A	G	A	G	-0.1368	2.02502e-06	0.02874	-0.0012	0.9149	0.0117	FALSE	TRUE
IgD+ CD38br %lymphocyte	Alzheimer's disease	rs7667070	C	T	C	T	-0.283	8.55697e-06	0.06349	0.0144	0.4903	0.0209	FALSE	TRUE
IgD+ CD38br %lymphocyte	Alzheimer's disease	rs78658073	A	G	A	G	1.792	1.011e-06	0.3659	-0.0362	0.1386	0.0244	FALSE	TRUE
IgD+ CD38br %lymphocyte	Alzheimer's disease	rs80330977	A	G	A	G	-0.2327	2.46598e-07	0.04501	-0.007	0.6505	0.0155	FALSE	TRUE
PDL-1 on monocyte	Alzheimer's disease	rs10276990	A	C	A	C	0.198	1.59401e-06	0.04119	-0.0209	0.1801	0.0156	FALSE	TRUE
PDL-1 on monocyte	Alzheimer's disease	rs10454715	C	T	C	T	-0.5927	7.20493e-06	0.1319	0.0222	0.6409	0.0477	FALSE	TRUE
PDL-1 on monocyte	Alzheimer's disease	rs11038817	T	C	T	C	0.2878	4.66498e-06	0.06275	-0.0133	0.3697	0.0148	FALSE	TRUE
PDL-1 on monocyte	Alzheimer's disease	rs12953239	A	G	A	G	-0.4006	2.43198e-06	0.08485	-0.0247	0.599799	0.0472	FALSE	TRUE
PDL-1 on monocyte	Alzheimer's disease	rs17851876	T	G	T	G	0.2938	7.40696e-06	0.06547	0.0015	0.9296	0.0171	FALSE	TRUE
PDL-1 on monocyte	Alzheimer's disease	rs2569177	T	G	T	G	0.1298	1.447e-06	0.02689	0.0068	0.4477	0.009	FALSE	TRUE
PDL-1 on monocyte	Alzheimer's disease	rs4809811	T	C	T	C	-0.1168	3.89996e-06	0.02527	-0.0027	0.748001	0.0083	FALSE	TRUE
PDL-1 on monocyte	Alzheimer's disease	rs4908637	A	G	A	G	0.3251	6.89208e-06	0.07219	0.0022	0.9045	0.0185	FALSE	TRUE
PDL-1 on monocyte	Alzheimer's disease	rs73160029	C	T	C	T	-0.5295	4.38399e-06	0.1151	-0.0589	0.2263	0.0487	FALSE	TRUE
PDL-1 on monocyte	Alzheimer's disease	rs74538501	T	C	T	C	-1.394	1.40001e-06	0.2885	0.0377	0.3696	0.042	FALSE	TRUE
PDL-1 on monocyte	Alzheimer's disease	rs75567064	A	G	A	G	0.1914	5.84104e-07	0.03824	0.0359	0.06665	0.0196	FALSE	TRUE
PDL-1 on monocyte	Alzheimer's disease	rs8089422	A	G	A	G	-0.2397	5.19697e-06	0.05252	-0.0171	0.3569	0.0186	FALSE	TRUE
CD28- CD8dim AC	Alzheimer's disease	rs10107063	C	T	C	T	-0.6397	2.93697e-06	0.1366	0.0106	0.7982	0.0413	FALSE	TRUE
CD28- CD8dim AC	Alzheimer's disease	rs10772894	G	A	G	A	-0.2226	3.52996e-06	0.04792	0.0224	0.1887	0.0171	FALSE	TRUE
CD28- CD8dim AC	Alzheimer's disease	rs111273508	A	G	A	G	0.5414	4.622e-06	0.118	-0.0365	0.1609	0.026	FALSE	TRUE
CD28- CD8dim AC	Alzheimer's disease	rs111748563	G	A	G	A	0.2783	1.992e-06	0.05843	0.0024	0.9231	0.0246	FALSE	TRUE
CD28- CD8dim AC	Alzheimer's disease	rs115125396	C	T	C	T	0.2114	4.99701e-06	0.04624	-0.0133	0.4444	0.0174	FALSE	TRUE
CD28- CD8dim AC	Alzheimer's disease	rs12185529	A	G	A	G	0.3958	2.427e-06	0.08382	-0.0288	0.1337	0.0192	FALSE	TRUE
CD28- CD8dim AC	Alzheimer's disease	rs12204116	C	T	C	T	-0.1732	3.82199e-06	0.03742	0.011	0.264	0.0098	FALSE	TRUE
CD28- CD8dim AC	Alzheimer's disease	rs12986962	G	A	G	A	-0.1568	3.58501e-08	0.0284	-0.0206	0.0147201	0.0085	FALSE	TRUE
CD28- CD8dim AC	Alzheimer's disease	rs13207893	C	T	C	T	-0.1446	4.27799e-06	0.0314	0.0106	0.4282	0.0134	FALSE	TRUE
CD28- CD8dim AC	Alzheimer's disease	rs139090356	G	A	G	A	0.9354	4.03097e-06	0.2026	-0.0278	0.515	0.0427	FALSE	TRUE
CD28- CD8dim AC	Alzheimer's disease	rs139249541	G	A	G	A	0.4038	8.62005e-08	0.07526	-0.0593	0.1233	0.0384	FALSE	TRUE
CD28- CD8dim AC	Alzheimer's disease	rs142837365	G	A	G	A	-0.8597	6.14002e-06	0.1898	0.0243	0.4195	0.03	FALSE	TRUE
CD28- CD8dim AC	Alzheimer's disease	rs35947132	A	G	A	G	0.2001	5.05697e-06	0.04379	-0.0008	0.9686	0.0199	FALSE	TRUE
CD28- CD8dim AC	Alzheimer's disease	rs483239	T	C	T	C	-0.128	8.56604e-06	0.02872	-0.007	0.502	0.0104	FALSE	TRUE
CD28- CD8dim AC	Alzheimer's disease	rs535307	G	A	G	A	-0.1242	2.72898e-06	0.02643	-0.0156	0.0782492	0.0088	FALSE	TRUE
CD28- CD8dim AC	Alzheimer's disease	rs58745116	A	G	A	G	0.1662	1.05201e-10	0.02565	-0.0015	0.8621	0.0084	FALSE	TRUE
CD28- CD8dim AC	Alzheimer's disease	rs626030	G	T	G	T	0.3043	4.81504e-06	0.06645	0.0151	0.2496	0.0131	FALSE	TRUE
CD28- CD8dim AC	Alzheimer's disease	rs7152367	A	G	A	G	0.4723	2.35201e-06	0.09988	0.009	0.6462	0.0196	FALSE	TRUE
CD28- CD8dim AC	Alzheimer's disease	rs7448311	C	T	C	T	-0.1263	2.21998e-06	0.02665	0.0013	0.8792	0.0087	FALSE	TRUE
CD28- CD8dim AC	Alzheimer's disease	rs75436543	T	C	T	C	-1.111	7.46002e-06	0.2476	0.0049	0.8771	0.0318	FALSE	TRUE
CD28- CD8dim AC	Alzheimer's disease	rs79122093	G	A	G	A	0.3929	3.86803e-07	0.07727	0.0087	0.7616	0.0286	FALSE	TRUE
CD28- CD8dim AC	Alzheimer's disease	rs7937886	T	G	T	G	-0.1279	1.57899e-06	0.02659	0.0079	0.365	0.0087	FALSE	TRUE
CD28- CD8dim AC	Alzheimer's disease	rs79597088	A	G	A	G	0.5682	8.95901e-06	0.1277	0.0299	0.1692	0.0218	FALSE	TRUE
CD28- CD8dim AC	Alzheimer's disease	rs7990259	G	A	G	A	0.1712	2.121e-06	0.03605	0.0144	0.1413	0.0098	FALSE	TRUE
CD28- CD8dim AC	Alzheimer's disease	rs80109323	T	C	T	C	1.692	1.14101e-06	0.347	0.0053	0.8963	0.0407	FALSE	TRUE
CD28- CD8dim AC	Alzheimer's disease	rs9836603	T	C	T	C	-0.1164	7.19499e-06	0.02589	-0.0028	0.7535	0.0091	FALSE	TRUE
IgD+ CD38- %B cell	Alzheimer's disease	rs10111625	G	A	G	A	-0.1169	7.72094e-06	0.02611	0.0083	0.3763	0.0094	FALSE	TRUE
IgD+ CD38- %B cell	Alzheimer's disease	rs10254361	T	G	T	G	0.1333	4.40099e-06	0.02899	-0.0158	0.1057	0.0097	FALSE	TRUE
IgD+ CD38- %B cell	Alzheimer's disease	rs10444793	A	G	A	G	-0.4608	4.34901e-07	0.09102	-0.0053	0.814	0.0226	FALSE	TRUE
IgD+ CD38- %B cell	Alzheimer's disease	rs113398446	C	A	C	A	0.1793	3.91201e-08	0.03256	0.0086	0.4271	0.0108	FALSE	TRUE
IgD+ CD38- %B cell	Alzheimer's disease	rs115802369	G	A	G	A	-0.4129	7.76497e-06	0.0922	0.0136	0.7185	0.0378	FALSE	TRUE
IgD+ CD38- %B cell	Alzheimer's disease	rs12122084	A	G	A	G	-0.1408	5.93895e-06	0.03104	0.0231	0.0277498	0.0105	FALSE	TRUE
IgD+ CD38- %B cell	Alzheimer's disease	rs147135384	C	T	C	T	-2.756	8.78294e-06	0.6192	0.0014	0.9739	0.0436	FALSE	TRUE
IgD+ CD38- %B cell	Alzheimer's disease	rs148952274	T	C	T	C	-2.911	7.01003e-06	0.6469	0.0485	0.3621	0.0532	FALSE	TRUE
IgD+ CD38- %B cell	Alzheimer's disease	rs1512044	A	G	A	G	0.202	2.07e-07	0.03882	-0.0167	0.2683	0.0151	FALSE	TRUE
IgD+ CD38- %B cell	Alzheimer's disease	rs181771926	A	G	A	G	-0.5276	1.73002e-06	0.1101	-0.0203	0.6016	0.0389	FALSE	TRUE
IgD+ CD38- %B cell	Alzheimer's disease	rs2251199	G	A	G	A	0.1168	5.73799e-06	0.02572	-0.0092	0.2696	0.0083	FALSE	TRUE
IgD+ CD38- %B cell	Alzheimer's disease	rs2621369	T	C	T	C	0.1498	2.13098e-06	0.03155	0.0269	0.00193201	0.0087	FALSE	TRUE
IgD+ CD38- %B cell	Alzheimer's disease	rs329966	G	A	G	A	0.1246	3.62702e-07	0.02445	-0.0009	0.9252	0.0094	FALSE	TRUE
IgD+ CD38- %B cell	Alzheimer's disease	rs35050775	T	G	T	G	0.3463	7.53894e-06	0.07724	0.1008	0.03271	0.0472	FALSE	TRUE
IgD+ CD38- %B cell	Alzheimer's disease	rs7012048	C	T	C	T	0.1407	6.25403e-06	0.0311	0.0034	0.753401	0.0109	FALSE	TRUE
IgD+ CD38- %B cell	Alzheimer's disease	rs73909843	C	T	C	T	-0.2138	4.00904e-06	0.04629	0.0197	0.1365	0.0132	FALSE	TRUE
IgD+ CD38- %B cell	Alzheimer's disease	rs76376526	T	C	T	C	0.4948	7.20593e-06	0.1101	0.0526	0.09517	0.0315	FALSE	TRUE
IgD+ CD38- %B cell	Alzheimer's disease	rs78009119	G	T	G	T	-0.4914	3.88401e-06	0.1063	-0.0195	0.5734	0.0345	FALSE	TRUE
IgD+ CD38- %B cell	Alzheimer's disease	rs79870102	G	A	G	A	0.9733	6.83502e-06	0.216	0.0215	0.512	0.0328	FALSE	TRUE
IgD+ CD38- %B cell	Alzheimer's disease	rs80032720	A	G	A	G	0.2539	3.08901e-06	0.05434	-0.0133	0.6442	0.0288	FALSE	TRUE
CD33br HLA DR+ CD14dim AC	Alzheimer's disease	rs112790132	A	G	A	G	-0.7381	6.81993e-07	0.1481	0.0241	0.2358	0.0203	FALSE	TRUE
CD33br HLA DR+ CD14dim AC	Alzheimer's disease	rs113771439	A	G	A	G	0.1922	9.1199e-07	0.03902	0.0046	0.692599	0.0116	FALSE	TRUE
CD33br HLA DR+ CD14dim AC	Alzheimer's disease	rs115048709	T	C	T	C	-0.3	6.56705e-06	0.06637	0.0066	0.8011	0.0263	FALSE	TRUE
CD33br HLA DR+ CD14dim AC	Alzheimer's disease	rs11618675	A	G	A	G	0.4989	3.94403e-06	0.1078	0.0294	0.3686	0.0327	FALSE	TRUE
CD33br HLA DR+ CD14dim AC	Alzheimer's disease	rs139406769	G	A	G	A	0.9302	8.89795e-06	0.2088	0.0789	0.0883609	0.0463	FALSE	TRUE
CD33br HLA DR+ CD14dim AC	Alzheimer's disease	rs142206516	A	G	A	G	3.667	6.42599e-06	0.8104	-0.0586	0.2215	0.0479	FALSE	TRUE
CD33br HLA DR+ CD14dim AC	Alzheimer's disease	rs142786778	A	G	A	G	-1.725	3.96196e-06	0.3728	-0.0024	0.9422	0.0326	FALSE	TRUE
CD33br HLA DR+ CD14dim AC	Alzheimer's disease	rs182908654	C	T	C	T	-2.178	6.68005e-07	0.4366	-0.0092	0.8198	0.0404	FALSE	TRUE
CD33br HLA DR+ CD14dim AC	Alzheimer's disease	rs1865405	C	A	C	A	-0.2028	8.88198e-06	0.04552	0.0028	0.787501	0.0105	FALSE	TRUE
CD33br HLA DR+ CD14dim AC	Alzheimer's disease	rs187512831	A	G	A	G	-0.3177	5.24095e-06	0.06955	0.0912	0.00881597	0.0348	FALSE	TRUE
CD33br HLA DR+ CD14dim AC	Alzheimer's disease	rs187876923	T	C	T	C	0.5732	1.74301e-06	0.1195	0.0097	0.6064	0.0188	FALSE	TRUE
CD33br HLA DR+ CD14dim AC	Alzheimer's disease	rs3770997	C	T	C	T	0.159	6.96194e-06	0.03528	0.0112	0.1765	0.0083	FALSE	TRUE
CD33br HLA DR+ CD14dim AC	Alzheimer's disease	rs3865444	A	C	A	C	-0.3278	1.08493e-16	0.03915	-0.0337	0.000309999	0.0093	FALSE	TRUE
CD33br HLA DR+ CD14dim AC	Alzheimer's disease	rs5020267	G	A	G	A	0.2123	5.95196e-06	0.04676	0.0039	0.710901	0.0105	FALSE	TRUE
CD33br HLA DR+ CD14dim AC	Alzheimer's disease	rs55652412	T	C	T	C	0.5837	7.04093e-06	0.1296	0.003	0.9313	0.0354	FALSE	TRUE
CD33br HLA DR+ CD14dim AC	Alzheimer's disease	rs56151283	G	A	G	A	-0.5483	5.665e-06	0.1205	-0.0532	0.1239	0.0346	FALSE	TRUE
CD33br HLA DR+ CD14dim AC	Alzheimer's disease	rs7180375	C	T	C	T	0.158	4.72803e-06	0.03442	-0.0102	0.2244	0.0084	FALSE	TRUE
CD33br HLA DR+ CD14dim AC	Alzheimer's disease	rs73039451	A	G	A	G	-0.3852	5.22396e-06	0.0843	0.0083	0.782	0.0299	FALSE	TRUE
CD33br HLA DR+ CD14dim AC	Alzheimer's disease	rs74253876	T	C	T	C	-0.2252	1.45001e-08	0.03955	0.0052	0.6562	0.0116	FALSE	TRUE
CD33br HLA DR+ CD14dim AC	Alzheimer's disease	rs76694877	G	T	G	T	-0.3759	7.955e-07	0.07589	-0.0143	0.589	0.0265	FALSE	TRUE
CD33br HLA DR+ CD14dim AC	Alzheimer's disease	rs77594041	T	C	T	C	0.9334	3.31703e-06	0.2001	0.0265	0.3967	0.0313	FALSE	TRUE
CD33br HLA DR+ CD14dim AC	Alzheimer's disease	rs9548748	T	C	T	C	0.1603	1.30599e-06	0.03302	-0.0027	0.7406	0.0082	FALSE	TRUE
CD4RA on TD CD4+	Alzheimer's disease	rs10114587	G	A	G	A	-0.2921	4.99597e-06	0.06387	0.0267	0.1585	0.0189	FALSE	TRUE
CD4RA on TD CD4+	Alzheimer's disease	rs10815513	A	G	A	G	-0.1382	7.284e-06	0.03076	-0.0065	0.5384	0.0105	FALSE	TRUE
CD4RA on TD CD4+	Alzheimer's disease	rs11579717	A	G	A	G	1.19	4.314e-09	0.202	0.0488	0.0161102	0.0203	FALSE	TRUE
CD4RA on TD CD4+	Alzheimer's disease	rs116345427	A	G	A	G	1.005	7.50395e-06	0.224	-0.0215	0.5581	0.0368	FALSE	TRUE
CD4RA on TD CD4+	Alzheimer's disease	rs11652274	A	G	A	G	-0.1887	6.04102e-06	0.04162	0.0149	0.1452	0.0102	FALSE	TRUE
CD4RA on TD CD4+	Alzheimer's disease	rs116794175	C	T	C	T	0.8908	9.63896e-06	0.201	0.041	0.573099	0.0728	FALSE	TRUE
CD4RA on TD CD4+	Alzheimer's disease	rs117931526	C	T	C	T	-2.267	5.40605e-06	0.4975	-0.0157	0.5905	0.0292	FALSE	TRUE
CD4RA on TD CD4+	Alzheimer's disease	rs1328601	C	T	C	T	-0.5667	8.77607e-06	0.1272	-0.0126	0.5259	0.0199	FALSE	TRUE
CD4RA on TD CD4+	Alzheimer's disease	rs13292669	C	T	C	T	-0.1525	8.90492e-06	0.03426	-0.0116	0.2487	0.0101	FALSE	TRUE
CD4RA on TD CD4+	Alzheimer's disease	rs147201746	A	G	A	G	-0.6008	8.72107e-07	0.1219	0.0564	0.0818201	0.0324	FALSE	TRUE
CD4RA on TD CD4+	Alzheimer's disease	rs1504496	A	G	A	G	0.3839	4.68101e-06	0.08369	0.031	0.0268497	0.014	FALSE	TRUE
CD4RA on TD CD4+	Alzheimer's disease	rs181435089	T	C	T	C	-0.4158	1.71601e-06	0.08674	0.0164	0.688101	0.0409	FALSE	TRUE
CD4RA on TD CD4+	Alzheimer's disease	rs1861266	C	A	C	A	0.1564	6.34293e-06	0.03457	-0.0152	0.0832895	0.0088	FALSE	TRUE
CD4RA on TD CD4+	Alzheimer's disease	rs34645541	A	C	A	C	0.7022	6.52499e-07	0.1408	0.0602	0.03535	0.0286	FALSE	TRUE
CD4RA on TD CD4+	Alzheimer's disease	rs4261817	C	T	C	T	0.1204	8.47891e-06	0.02699	0.0025	0.756401	0.0082	FALSE	TRUE
CD4RA on TD CD4+	Alzheimer's disease	rs4670907	T	C	T	C	-0.2086	2.01002e-06	0.04381	-0.017	0.2721	0.0155	FALSE	TRUE
CD4RA on TD CD4+	Alzheimer's disease	rs541367304	A	G	A	G	2.073	1.70216e-13	0.2799	0.0454	0.1875	0.0344	FALSE	TRUE
CD4RA on TD CD4+	Alzheimer's disease	rs7559619	G	A	G	A	-0.2144	1.08993e-13	0.02871	-0.0086	0.3142	0.0086	FALSE	TRUE
CD4RA on TD CD4+	Alzheimer's disease	rs78528853	G	A	G	A	0.4624	8.52707e-06	0.1037	0.0137	0.494399	0.02	FALSE	TRUE
CD4RA on TD CD4+	Alzheimer's disease	rs78804476	A	G	A	G	1.623	5.03698e-06	0.355	0.0009	0.9809	0.0357	FALSE	TRUE
CD4RA on TD CD4+	Alzheimer's disease	rs7894393	C	T	C	T	0.1644	8.70001e-06	0.03689	-0.0093	0.4564	0.0125	FALSE	TRUE
CD4RA on TD CD4+	Alzheimer's disease	rs822833	T	C	T	C	-0.1386	3.77103e-06	0.02992	0.005	0.590999	0.0094	FALSE	TRUE
CD4RA on TD CD4+	Alzheimer's disease	rs929785	C	T	C	T	0.1273	6.54696e-06	0.02819	0.0008	0.9402	0.0102	FALSE	TRUE
CD4RA on TD CD4+	Alzheimer's disease	rs931816	G	A	G	A	0.1874	7.69697e-06	0.04181	0.0076	0.4633	0.0103	FALSE	TRUE
CD4 on CD45RA+ CD4+	Alzheimer's disease	rs10115790	A	G	A	G	-0.1469	4.678e-06	0.03202	0.0093	0.3267	0.0095	FALSE	TRUE
CD4 on CD45RA+ CD4+	Alzheimer's disease	rs10501464	C	T	C	T	-0.166	7.91207e-06	0.03709	-0.0123	0.264	0.011	FALSE	TRUE
CD4 on CD45RA+ CD4+	Alzheimer's disease	rs11073860	A	G	A	G	-0.4282	8.95509e-06	0.09624	0.0314	0.1383	0.0212	FALSE	TRUE
CD4 on CD45RA+ CD4+	Alzheimer's disease	rs11584966	G	A	G	A	-0.2921	3.05197e-06	0.06245	0.0264	0.0308503	0.0122	FALSE	TRUE
CD4 on CD45RA+ CD4+	Alzheimer's disease	rs11615628	A	G	A	G	-0.3264	6.461e-25	0.03137	0.0085	0.3482	0.009	FALSE	TRUE
CD4 on CD45RA+ CD4+	Alzheimer's disease	rs11807869	T	C	T	C	0.2431	7.92392e-06	0.05433	0.0096	0.3735	0.0108	FALSE	TRUE
CD4 on CD45RA+ CD4+	Alzheimer's disease	rs118120903	T	C	T	C	-0.3735	9.05503e-06	0.084	0.0303	0.3542	0.0327	FALSE	TRUE
CD4 on CD45RA+ CD4+	Alzheimer's disease	rs144911886	T	C	T	C	-0.8342	7.00197e-06	0.1853	0.0174	0.667	0.0405	FALSE	TRUE
CD4 on CD45RA+ CD4+	Alzheimer's disease	rs147954895	C	A	C	A	0.8449	5.47697e-06	0.1855	-0.0664	0.2348	0.0559	FALSE	TRUE
CD4 on CD45RA+ CD4+	Alzheimer's disease	rs16831529	T	C	T	C	0.2211	7.40798e-06	0.04925	0.0164	0.3003	0.0158	FALSE	TRUE
CD4 on CD45RA+ CD4+	Alzheimer's disease	rs184697850	T	C	T	C	0.5163	8.87708e-06	0.116	0.0357	0.319	0.0358	FALSE	TRUE
CD4 on CD45RA+ CD4+	Alzheimer's disease	rs2960460	T	C	T	C	0.1554	6.68806e-06	0.03445	0.0082	0.4417	0.0106	FALSE	TRUE
CD4 on CD45RA+ CD4+	Alzheimer's disease	rs368550319	A	C	A	C	-0.2538	1.022e-06	0.05183	-0.008	0.7119	0.0217	FALSE	TRUE
CD4 on CD45RA+ CD4+	Alzheimer's disease	rs4487854	G	A	G	A	-0.3762	1.237e-06	0.0774	0.0645	0.0299999	0.0297	FALSE	TRUE
CD4 on CD45RA+ CD4+	Alzheimer's disease	rs530397075	A	G	A	G	0.2671	4.89305e-06	0.05834	-0.0117	0.316	0.0117	FALSE	TRUE
CD4 on CD45RA+ CD4+	Alzheimer's disease	rs547243038	T	C	T	C	-0.3844	3.43803e-06	0.08263	0.0586	0.252	0.0512	FALSE	TRUE
CD4 on CD45RA+ CD4+	Alzheimer's disease	rs61951572	C	T	C	T	0.3779	3.74102e-06	0.08154	-0.0097	0.665301	0.0225	FALSE	TRUE
CD4 on CD45RA+ CD4+	Alzheimer's disease	rs6580816	T	C	T	C	0.1345	7.51294e-06	0.02997	0.0098	0.2525	0.0085	FALSE	TRUE
CD4 on CD45RA+ CD4+	Alzheimer's disease	rs72712872	C	T	C	T	0.529	8.91005e-06	0.1189	-0.0274	0.285	0.0256	FALSE	TRUE
CD4 on CD45RA+ CD4+	Alzheimer's disease	rs7827166	A	G	A	G	0.4894	9.3981e-06	0.1103	0.0129	0.4475	0.017	FALSE	TRUE
CD4 on CD45RA+ CD4+	Alzheimer's disease	rs8009128	A	G	A	G	-0.2001	6.39102e-06	0.04426	-0.0009	0.9299	0.0106	FALSE	TRUE
CD4 on CD45RA+ CD4+	Alzheimer's disease	rs9939476	A	G	A	G	-0.1267	8.16996e-06	0.02835	0.011	0.2032	0.0086	FALSE	TRUE
CD4 on CD45RA+ CD4+	Alzheimer's disease	rs9992090	T	C	T	C	-0.1399	4.15403e-06	0.03033	0.0001	0.9879	0.0083	FALSE	TRUE
Activated Treg %CD4	Alzheimer's disease	rs10511150	A	G	A	G	0.1452	1.434e-06	0.03006	-0.0105	0.3125	0.0104	FALSE	TRUE
Activated Treg %CD4	Alzheimer's disease	rs112009416	C	T	C	T	-0.6866	2.556e-07	0.133	0.0261	0.307	0.0256	FALSE	TRUE
Activated Treg %CD4	Alzheimer's disease	rs11579717	A	G	A	G	-0.8482	6.72001e-06	0.1881	0.0488	0.0161102	0.0203	FALSE	TRUE
Activated Treg %CD4	Alzheimer's disease	rs138751156	C	T	C	T	0.2547	5.64794e-06	0.05603	0.009	0.7264	0.0258	FALSE	TRUE
Activated Treg %CD4	Alzheimer's disease	rs138915779	A	C	A	C	-1.152	5.25001e-07	0.2291	0.0334	0.2641	0.0299	FALSE	TRUE
Activated Treg %CD4	Alzheimer's disease	rs139191636	A	G	A	G	-0.2311	8.06102e-06	0.0517	-0.0146	0.4383	0.0188	FALSE	TRUE
Activated Treg %CD4	Alzheimer's disease	rs149143064	A	G	A	G	-0.354	4.46303e-06	0.07702	-0.0066	0.8079	0.0271	FALSE	TRUE
Activated Treg %CD4	Alzheimer's disease	rs16903407	T	G	T	G	0.4769	1.037e-06	0.09746	-0.0049	0.7988	0.0194	FALSE	TRUE
Activated Treg %CD4	Alzheimer's disease	rs17038606	T	C	T	C	0.4076	5.19003e-06	0.0893	-0.0153	0.6078	0.0298	FALSE	TRUE
Activated Treg %CD4	Alzheimer's disease	rs1820840	C	T	C	T	-0.1138	6.55707e-06	0.02521	-0.0052	0.5267	0.0083	FALSE	TRUE
Activated Treg %CD4	Alzheimer's disease	rs3793566	C	T	C	T	-0.1278	6.78907e-06	0.02836	0.0089	0.3247	0.0091	FALSE	TRUE
Activated Treg %CD4	Alzheimer's disease	rs4109437	A	G	A	G	-0.7478	4.42099e-07	0.1478	0.0125	0.6205	0.0253	FALSE	TRUE
Activated Treg %CD4	Alzheimer's disease	rs56295335	A	G	A	G	0.2145	1.47201e-06	0.04447	-0.0041	0.752801	0.0129	FALSE	TRUE
Activated Treg %CD4	Alzheimer's disease	rs597808	G	A	G	A	0.1264	2.536e-06	0.02682	0.0157	0.0535895	0.0081	FALSE	TRUE
Activated Treg %CD4	Alzheimer's disease	rs7078614	T	G	T	G	0.1375	1.963e-07	0.02638	-0.0089	0.2861	0.0083	FALSE	TRUE
Activated Treg %CD4	Alzheimer's disease	rs8112021	C	T	C	T	0.121	9.98688e-06	0.02734	0.0043	0.6891	0.0107	FALSE	TRUE
NK %lymphocyte	Alzheimer's disease	rs10118740	A	G	A	G	-0.2745	2.95903e-06	0.05864	0.0083	0.701	0.0216	FALSE	TRUE
NK %lymphocyte	Alzheimer's disease	rs10512469	T	C	T	C	0.249	1.97606e-15	0.03122	-0.0125	0.2365	0.0105	FALSE	TRUE
NK %lymphocyte	Alzheimer's disease	rs10948071	T	C	T	C	0.1124	1.97201e-06	0.0236	-0.0082	0.3145	0.0082	FALSE	TRUE
NK %lymphocyte	Alzheimer's disease	rs113667813	A	G	A	G	0.2542	6.67406e-06	0.05635	-0.0114	0.5762	0.0205	FALSE	TRUE
NK %lymphocyte	Alzheimer's disease	rs115345454	C	A	C	A	0.7308	8.97594e-06	0.1644	0.013	0.668399	0.0303	FALSE	TRUE
NK %lymphocyte	Alzheimer's disease	rs115644251	T	C	T	C	0.2646	5.12495e-06	0.05794	0.0364	0.2398	0.0309	FALSE	TRUE
NK %lymphocyte	Alzheimer's disease	rs11954223	A	G	A	G	-1.682	2.77198e-06	0.3583	0.007	0.8115	0.0295	FALSE	TRUE
NK %lymphocyte	Alzheimer's disease	rs144650982	T	C	T	C	0.5517	9.09494e-06	0.1242	-0.0362	0.312	0.0358	FALSE	TRUE
NK %lymphocyte	Alzheimer's disease	rs149863465	A	G	A	G	0.328	6.18301e-06	0.07247	-0.0069	0.8634	0.0402	FALSE	TRUE
NK %lymphocyte	Alzheimer's disease	rs183053322	T	C	T	C	-0.408	2.51299e-10	0.06431	0.0357	0.3472	0.038	FALSE	TRUE
NK %lymphocyte	Alzheimer's disease	rs2269705	C	T	C	T	0.1676	3.75604e-06	0.0362	0.0168	0.277	0.0154	FALSE	TRUE
NK %lymphocyte	Alzheimer's disease	rs2426800	T	C	T	C	0.1023	8.94891e-06	0.02301	-0.0112	0.1739	0.0082	FALSE	TRUE
NK %lymphocyte	Alzheimer's disease	rs2546701	G	A	G	A	0.105	8.16695e-06	0.0235	0.0081	0.3399	0.0085	FALSE	TRUE
NK %lymphocyte	Alzheimer's disease	rs281407	A	G	A	G	0.1157	2.19801e-06	0.0244	-0.0151	0.1017	0.0092	FALSE	TRUE
NK %lymphocyte	Alzheimer's disease	rs281414	A	G	A	G	0.1347	5.70296e-06	0.02964	-0.015	0.1889	0.0115	FALSE	TRUE
NK %lymphocyte	Alzheimer's disease	rs3787412	A	C	A	C	-0.1923	2.61e-06	0.04086	-0.0029	0.8119	0.012	FALSE	TRUE
NK %lymphocyte	Alzheimer's disease	rs57576269	A	C	A	C	-0.1329	7.03801e-06	0.02954	-0.0092	0.4615	0.0125	FALSE	TRUE
NK %lymphocyte	Alzheimer's disease	rs62130952	A	G	A	G	-1.284	4.08301e-06	0.2783	0.0005	0.9861	0.0266	FALSE	TRUE
NK %lymphocyte	Alzheimer's disease	rs73027720	T	C	T	C	-0.9938	5.49503e-06	0.2183	0.027	0.4021	0.0323	FALSE	TRUE
NK %lymphocyte	Alzheimer's disease	rs77438219	A	G	A	G	-1.131	1.58099e-06	0.2353	0.0102	0.731601	0.0298	FALSE	TRUE
NK %lymphocyte	Alzheimer's disease	rs7998044	C	T	C	T	0.2685	6.58597e-06	0.0595	-0.0018	0.9346	0.0225	FALSE	TRUE
NK %lymphocyte	Alzheimer's disease	rs9916257	T	G	T	G	-0.2323	1.51391e-23	0.02306	0.001	0.9021	0.0082	FALSE	TRUE
Unsw Mem %lymphocyte	Alzheimer's disease	rs10119513	A	G	A	G	0.3622	9.91197e-06	0.08185	0.041	0.0495804	0.0209	FALSE	TRUE
Unsw Mem %lymphocyte	Alzheimer's disease	rs10840410	C	T	C	T	-0.1182	7.88206e-06	0.02642	0.0141	0.1259	0.0092	FALSE	TRUE
Unsw Mem %lymphocyte	Alzheimer's disease	rs10894530	A	C	A	C	-0.1638	9.00409e-06	0.03684	0.0039	0.7181	0.0108	FALSE	TRUE
Unsw Mem %lymphocyte	Alzheimer's disease	rs11657759	C	A	C	A	-0.1271	1.16099e-07	0.02394	-0.0277	0.001073	0.0085	FALSE	TRUE
Unsw Mem %lymphocyte	Alzheimer's disease	rs11794578	G	T	G	T	0.1189	1.12101e-06	0.02437	-0.0228	0.005434	0.0082	FALSE	TRUE
Unsw Mem %lymphocyte	Alzheimer's disease	rs12829274	G	A	G	A	-0.2536	7.30601e-07	0.0511	0.006	0.7165	0.0164	FALSE	TRUE
Unsw Mem %lymphocyte	Alzheimer's disease	rs12874404	G	A	G	A	0.1827	4.02346e-12	0.02625	-0.0343	0.0471802	0.0173	FALSE	TRUE
Unsw Mem %lymphocyte	Alzheimer's disease	rs141247883	G	A	G	A	-0.3185	3.34503e-06	0.06842	-0.0329	0.619901	0.0663	FALSE	TRUE
Unsw Mem %lymphocyte	Alzheimer's disease	rs144625305	T	C	T	C	0.5993	8.30004e-06	0.1343	-0.0269	0.5183	0.0416	FALSE	TRUE
Unsw Mem %lymphocyte	Alzheimer's disease	rs2956955	C	T	C	T	-0.3254	1.47099e-06	0.06746	0.0865	0.00595004	0.0315	FALSE	TRUE
Unsw Mem %lymphocyte	Alzheimer's disease	rs557577736	G	A	G	A	1.799	2.857e-06	0.3838	-0.0691	0.1182	0.0443	FALSE	TRUE
Unsw Mem %lymphocyte	Alzheimer's disease	rs56326639	G	A	G	A	0.1461	6.29999e-06	0.0323	-0.0029	0.8268	0.0132	FALSE	TRUE
Unsw Mem %lymphocyte	Alzheimer's disease	rs57757402	G	A	G	A	-0.1601	5.67806e-06	0.03523	0.0094	0.4059	0.0113	FALSE	TRUE
Unsw Mem %lymphocyte	Alzheimer's disease	rs6032660	A	G	A	G	-0.1525	7.19797e-09	0.02629	0.0039	0.676401	0.0093	FALSE	TRUE
Unsw Mem %lymphocyte	Alzheimer's disease	rs6557137	T	C	T	C	-0.1494	3.62001e-06	0.03221	-0.0051	0.6593	0.0115	FALSE	TRUE
Unsw Mem %lymphocyte	Alzheimer's disease	rs7254039	A	G	A	G	-0.2695	3.20797e-06	0.05778	0.0418	0.0398896	0.0203	FALSE	TRUE
Unsw Mem %lymphocyte	Alzheimer's disease	rs73192651	T	C	T	C	0.5455	6.53597e-10	0.08807	0.155	0.00447703	0.0545	FALSE	TRUE
Unsw Mem %lymphocyte	Alzheimer's disease	rs75766272	T	C	T	C	-0.3961	3.51901e-06	0.08527	-0.0308	0.2466	0.0266	FALSE	TRUE
Unsw Mem %lymphocyte	Alzheimer's disease	rs76762356	G	A	G	A	-0.3702	7.91699e-06	0.08274	-0.0012	0.9457	0.017	FALSE	TRUE
Unsw Mem %lymphocyte	Alzheimer's disease	rs8014978	C	T	C	T	-0.1203	1.08201e-06	0.02463	0.0162	0.0525799	0.0083	FALSE	TRUE
CD4 on EM CD4+	Alzheimer's disease	rs10122230	G	A	G	A	0.1347	6.76301e-06	0.02988	-0.0026	0.7769	0.009	FALSE	TRUE
CD4 on EM CD4+	Alzheimer's disease	rs10927163	A	G	A	G	0.2497	6.29593e-06	0.05518	0.0117	0.2847	0.0109	FALSE	TRUE
CD4 on EM CD4+	Alzheimer's disease	rs11615628	A	G	A	G	-0.3219	1.20504e-24	0.03112	0.0085	0.3482	0.009	FALSE	TRUE
CD4 on EM CD4+	Alzheimer's disease	rs118120903	T	C	T	C	-0.414	7.40798e-07	0.08345	0.0303	0.3542	0.0327	FALSE	TRUE
CD4 on EM CD4+	Alzheimer's disease	rs12147140	T	C	T	C	0.1656	5.26296e-06	0.0363	0.0116	0.1978	0.009	FALSE	TRUE
CD4 on EM CD4+	Alzheimer's disease	rs12870415	C	T	C	T	-0.1293	7.85109e-06	0.02887	-0.0078	0.3438	0.0082	FALSE	TRUE
CD4 on EM CD4+	Alzheimer's disease	rs1569213	A	G	A	G	0.1305	9.72299e-06	0.02946	0.0229	0.0116399	0.0091	FALSE	TRUE
CD4 on EM CD4+	Alzheimer's disease	rs34560282	A	G	A	G	0.2069	8.73796e-06	0.04646	0.015	0.3346	0.0155	FALSE	TRUE
CD4 on EM CD4+	Alzheimer's disease	rs368550319	A	C	A	C	-0.2436	2.117e-06	0.05127	-0.008	0.7119	0.0217	FALSE	TRUE
CD4 on EM CD4+	Alzheimer's disease	rs4487854	G	A	G	A	-0.3589	3.14601e-06	0.07684	0.0645	0.0299999	0.0297	FALSE	TRUE
CD4 on EM CD4+	Alzheimer's disease	rs4878712	A	G	A	G	-0.1303	2.10499e-06	0.02741	-0.0007	0.9363	0.0082	FALSE	TRUE
CD4 on EM CD4+	Alzheimer's disease	rs530397075	A	G	A	G	0.291	5.19302e-07	0.05785	-0.0117	0.316	0.0117	FALSE	TRUE
CD4 on EM CD4+	Alzheimer's disease	rs60970806	A	C	A	C	0.1465	9.66696e-06	0.03306	0.017	0.1772	0.0126	FALSE	TRUE
CD4 on EM CD4+	Alzheimer's disease	rs61741426	A	G	A	G	-1.94	8.27694e-06	0.4343	-0.0193	0.2746	0.0177	FALSE	TRUE
CD4 on EM CD4+	Alzheimer's disease	rs7137828	T	C	T	C	-0.1358	1.45301e-06	0.02813	0.0155	0.0561798	0.0081	FALSE	TRUE
CD4 on EM CD4+	Alzheimer's disease	rs72712872	C	T	C	T	0.5243	8.04396e-06	0.1172	-0.0274	0.285	0.0256	FALSE	TRUE
CD4 on EM CD4+	Alzheimer's disease	rs78350981	A	G	A	G	-0.4206	9.96391e-06	0.09503	-0.026	0.4076	0.0313	FALSE	TRUE
CD4 on EM CD4+	Alzheimer's disease	rs9272242	C	T	C	T	0.2215	3.73422e-12	0.03175	0.0268	0.001239	0.0083	FALSE	TRUE
CD4 on EM CD4+	Alzheimer's disease	rs9992090	T	C	T	C	-0.1485	7.83394e-07	0.03	0.0001	0.9879	0.0083	FALSE	TRUE
CD62L on monocyte	Alzheimer's disease	rs10127711	G	A	G	A	0.1336	4.26697e-06	0.02899	-0.0137	0.0937303	0.0082	FALSE	TRUE
CD62L on monocyte	Alzheimer's disease	rs11225485	G	A	G	A	-0.1876	8.71305e-06	0.04211	-0.0255	0.0601201	0.0136	FALSE	TRUE
CD62L on monocyte	Alzheimer's disease	rs117965901	G	A	G	A	0.4954	9.43604e-06	0.1116	-0.0356	0.1413	0.0242	FALSE	TRUE
CD62L on monocyte	Alzheimer's disease	rs118080101	A	G	A	G	2.679	8.22508e-06	0.5997	0.0123	0.7012	0.032	FALSE	TRUE
CD62L on monocyte	Alzheimer's disease	rs12215799	T	C	T	C	0.3001	9.67698e-06	0.0677	0.0084	0.562	0.0145	FALSE	TRUE
CD62L on monocyte	Alzheimer's disease	rs141452540	C	T	C	T	-1.064	4.72302e-06	0.2319	0.0146	0.750501	0.0458	FALSE	TRUE
CD62L on monocyte	Alzheimer's disease	rs169046	C	T	C	T	0.1238	9.90307e-06	0.02796	-0.0089	0.2836	0.0083	FALSE	TRUE
CD62L on monocyte	Alzheimer's disease	rs184665042	A	C	A	C	-1.007	9.80099e-06	0.2274	0.0092	0.8654	0.0545	FALSE	TRUE
CD62L on monocyte	Alzheimer's disease	rs189683893	A	C	A	C	-0.9649	9.3821e-06	0.2174	-0.0075	0.8238	0.0339	FALSE	TRUE
CD62L on monocyte	Alzheimer's disease	rs235869	A	C	A	C	-0.1316	2.197e-06	0.02775	0.0158	0.0531202	0.0081	FALSE	TRUE
CD62L on monocyte	Alzheimer's disease	rs2404215	T	C	T	C	-0.296	6.68298e-06	0.0656	-0.0091	0.5927	0.0171	FALSE	TRUE
CD62L on monocyte	Alzheimer's disease	rs34142414	C	T	C	T	-0.1697	4.66595e-06	0.03699	-0.0116	0.353	0.0125	FALSE	TRUE
CD62L on monocyte	Alzheimer's disease	rs447362	C	T	C	T	-0.4011	3.05302e-06	0.08576	0.0145	0.4471	0.0191	FALSE	TRUE
CD62L on monocyte	Alzheimer's disease	rs4987369	T	G	T	G	-0.4474	3.50833e-50	0.02945	0.0026	0.762801	0.0087	FALSE	TRUE
CD62L on monocyte	Alzheimer's disease	rs6694645	C	T	C	T	0.1765	8.47403e-07	0.03576	0.007	0.4371	0.009	FALSE	TRUE
CD62L on monocyte	Alzheimer's disease	rs73462775	T	C	T	C	-0.647	2.25398e-06	0.1365	0.0445	0.2425	0.0381	FALSE	TRUE
CD62L on monocyte	Alzheimer's disease	rs73879235	G	A	G	A	-0.2804	2.75201e-06	0.05969	0.0013	0.9555	0.024	FALSE	TRUE
CD62L on monocyte	Alzheimer's disease	rs7516777	A	G	A	G	-0.1375	7.83502e-06	0.0307	-0.0109	0.267	0.0099	FALSE	TRUE
CD62L on monocyte	Alzheimer's disease	rs7540208	C	T	C	T	-0.3923	7.787e-06	0.08757	0.0394	0.0428105	0.0195	FALSE	TRUE
CD62L on monocyte	Alzheimer's disease	rs77224604	G	A	G	A	-0.217	4.97703e-06	0.04744	-0.0059	0.7146	0.016	FALSE	TRUE
CD62L on monocyte	Alzheimer's disease	rs7900893	A	G	A	G	-0.5507	5.611e-06	0.1211	0.0171	0.505	0.0257	FALSE	TRUE
CX3CR1 on CD14- CD16+ monocyte	Alzheimer's disease	rs10130058	A	G	A	G	-0.1793	4.20901e-06	0.0389	0.0203	0.1859	0.0153	FALSE	TRUE
CX3CR1 on CD14- CD16+ monocyte	Alzheimer's disease	rs1024619	C	T	C	T	-0.1191	9.7051e-06	0.02688	-0.0259	0.00408696	0.009	FALSE	TRUE
CX3CR1 on CD14- CD16+ monocyte	Alzheimer's disease	rs10779294	C	A	C	A	0.1255	9.99402e-06	0.02838	0.0103	0.2337	0.0086	FALSE	TRUE
CX3CR1 on CD14- CD16+ monocyte	Alzheimer's disease	rs112450242	T	C	T	C	-1.257	9.19009e-08	0.2349	0.0009	0.9587	0.0183	FALSE	TRUE
CX3CR1 on CD14- CD16+ monocyte	Alzheimer's disease	rs1208168	C	A	C	A	0.8599	7.32892e-06	0.1915	-0.0204	0.2823	0.019	FALSE	TRUE
CX3CR1 on CD14- CD16+ monocyte	Alzheimer's disease	rs12655590	T	C	T	C	-0.1323	3.86999e-06	0.0286	0.0013	0.8908	0.0094	FALSE	TRUE
CX3CR1 on CD14- CD16+ monocyte	Alzheimer's disease	rs140808371	T	C	T	C	0.1455	9.81206e-06	0.03286	-0.0082	0.4148	0.01	FALSE	TRUE
CX3CR1 on CD14- CD16+ monocyte	Alzheimer's disease	rs145135505	C	T	C	T	-0.2254	3.79498e-06	0.04869	0.0383	0.3112	0.0378	FALSE	TRUE
CX3CR1 on CD14- CD16+ monocyte	Alzheimer's disease	rs149100	G	T	G	T	-0.121	8.87401e-07	0.02458	0.0006	0.948	0.0085	FALSE	TRUE
CX3CR1 on CD14- CD16+ monocyte	Alzheimer's disease	rs1801274	G	A	G	A	-0.2388	6.5675e-20	0.02599	0.0103	0.2032	0.0081	FALSE	TRUE
CX3CR1 on CD14- CD16+ monocyte	Alzheimer's disease	rs2292701	A	G	A	G	-0.2432	8.95406e-06	0.05468	0.0129	0.6552	0.0289	FALSE	TRUE
CX3CR1 on CD14- CD16+ monocyte	Alzheimer's disease	rs41314914	A	G	A	G	0.2323	7.68706e-09	0.04013	0.0284	0.1459	0.0195	FALSE	TRUE
CX3CR1 on CD14- CD16+ monocyte	Alzheimer's disease	rs58215329	T	C	T	C	0.1903	6.86199e-07	0.03826	0.0054	0.7271	0.0154	FALSE	TRUE
CX3CR1 on CD14- CD16+ monocyte	Alzheimer's disease	rs6754954	A	G	A	G	-0.1236	4.65404e-06	0.02695	0.0034	0.707301	0.0092	FALSE	TRUE
CX3CR1 on CD14- CD16+ monocyte	Alzheimer's disease	rs75379034	A	G	A	G	0.2547	3.16497e-06	0.05458	-0.008	0.715899	0.0221	FALSE	TRUE
CX3CR1 on CD14- CD16+ monocyte	Alzheimer's disease	rs76913544	A	G	A	G	-0.2479	7.837e-06	0.05537	0.0008	0.9681	0.0191	FALSE	TRUE
CX3CR1 on CD14- CD16+ monocyte	Alzheimer's disease	rs9867963	T	C	T	C	-0.1289	6.66101e-06	0.02858	0.0031	0.717	0.0086	FALSE	TRUE
CX3CR1 on CD14- CD16+ monocyte	Alzheimer's disease	rs9877538	A	C	A	C	-0.1766	9.1939e-08	0.03298	0.0032	0.7605	0.0106	FALSE	TRUE
CD4 on CD39+ activated Treg	Alzheimer's disease	rs10130428	G	A	G	A	-0.2431	9.32395e-06	0.05476	-0.0006	0.9555	0.0114	FALSE	TRUE
CD4 on CD39+ activated Treg	Alzheimer's disease	rs11200863	A	G	A	G	-0.1689	4.61998e-06	0.03679	-0.0075	0.584	0.0138	FALSE	TRUE
CD4 on CD39+ activated Treg	Alzheimer's disease	rs11615628	A	G	A	G	-0.2062	5.4853e-11	0.03133	0.0085	0.3482	0.009	FALSE	TRUE
CD4 on CD39+ activated Treg	Alzheimer's disease	rs116421623	T	G	T	G	-0.6839	2.88602e-06	0.1459	-0.0359	0.2089	0.0286	FALSE	TRUE
CD4 on CD39+ activated Treg	Alzheimer's disease	rs12404655	G	A	G	A	-0.1494	2.5e-06	0.03167	0.0151	0.1128	0.0095	FALSE	TRUE
CD4 on CD39+ activated Treg	Alzheimer's disease	rs13127505	T	C	T	C	-0.2318	9.83309e-06	0.05235	0.0009	0.9454	0.0132	FALSE	TRUE
CD4 on CD39+ activated Treg	Alzheimer's disease	rs1385611	C	T	C	T	-0.3158	6.95392e-06	0.07014	0.0287	0.3916	0.0335	FALSE	TRUE
CD4 on CD39+ activated Treg	Alzheimer's disease	rs189810664	T	C	T	C	2.32	4.72705e-06	0.5059	-0.022	0.5477	0.0366	FALSE	TRUE
CD4 on CD39+ activated Treg	Alzheimer's disease	rs221124	A	G	A	G	-0.214	1.93999e-06	0.04487	0.0463	0.0131999	0.0187	FALSE	TRUE
CD4 on CD39+ activated Treg	Alzheimer's disease	rs2253487	A	G	A	G	0.2209	1.42298e-13	0.02974	-0.0072	0.3886	0.0083	FALSE	TRUE
CD4 on CD39+ activated Treg	Alzheimer's disease	rs3757517	C	T	C	T	0.1866	9.20005e-06	0.042	0.0136	0.2573	0.012	FALSE	TRUE
CD4 on CD39+ activated Treg	Alzheimer's disease	rs4127403	A	G	A	G	-0.2529	5.57494e-06	0.05558	-0.0132	0.4714	0.0183	FALSE	TRUE
CD4 on CD39+ activated Treg	Alzheimer's disease	rs61954768	G	T	G	T	0.2391	1.80901e-06	0.04999	0.0161	0.3688	0.0179	FALSE	TRUE
CD4 on CD39+ activated Treg	Alzheimer's disease	rs67057217	A	G	A	G	0.4459	7.43807e-06	0.09934	0.0225	0.3	0.0217	FALSE	TRUE
CD4 on CD39+ activated Treg	Alzheimer's disease	rs7095711	A	G	A	G	0.1921	5.76196e-06	0.04229	0.0128	0.2853	0.012	FALSE	TRUE
CD4 on CD39+ activated Treg	Alzheimer's disease	rs71420675	A	G	A	G	0.3983	9.34394e-06	0.08971	-0.0129	0.724399	0.0365	FALSE	TRUE
CD4 on CD39+ activated Treg	Alzheimer's disease	rs73084602	A	G	A	G	0.42	2.57798e-06	0.08915	0.0053	0.7076	0.0141	FALSE	TRUE
CD4 on CD39+ activated Treg	Alzheimer's disease	rs73205076	T	C	T	C	-0.753	6.35594e-06	0.1665	-0.0439	0.0626599	0.0236	FALSE	TRUE
CD4 on CD39+ activated Treg	Alzheimer's disease	rs73457945	G	A	G	A	-0.5368	6.718e-06	0.119	0.0464	0.2546	0.0408	FALSE	TRUE
CD4 on CD39+ activated Treg	Alzheimer's disease	rs9263475	G	A	G	A	0.2029	9.61391e-12	0.02967	0.0035	0.7145	0.0095	FALSE	TRUE
CD28+ CD45RA- CD8dim %T cell	Alzheimer's disease	rs10134215	T	C	T	C	-0.1268	7.98197e-06	0.02835	-0.0086	0.3343	0.0089	FALSE	TRUE
CD28+ CD45RA- CD8dim %T cell	Alzheimer's disease	rs10456250	C	T	C	T	-0.1123	3.09599e-06	0.02403	-0.0045	0.5861	0.0083	FALSE	TRUE
CD28+ CD45RA- CD8dim %T cell	Alzheimer's disease	rs114968045	C	T	C	T	0.1474	3.26798e-06	0.03162	0.0377	0.007753	0.0141	FALSE	TRUE
CD28+ CD45RA- CD8dim %T cell	Alzheimer's disease	rs115370355	T	G	T	G	1.355	2.10698e-06	0.2853	0.0108	0.8176	0.0466	FALSE	TRUE
CD28+ CD45RA- CD8dim %T cell	Alzheimer's disease	rs11579717	A	G	A	G	-1.201	1.41906e-11	0.1771	0.0488	0.0161102	0.0203	FALSE	TRUE
CD28+ CD45RA- CD8dim %T cell	Alzheimer's disease	rs116759767	A	G	A	G	-0.9923	1.45301e-08	0.1747	0.0055	0.8217	0.0246	FALSE	TRUE
CD28+ CD45RA- CD8dim %T cell	Alzheimer's disease	rs117455482	A	G	A	G	3.821	9.29309e-06	0.8607	-0.0407	0.2996	0.0392	FALSE	TRUE
CD28+ CD45RA- CD8dim %T cell	Alzheimer's disease	rs12235775	C	T	C	T	0.1346	3.78704e-07	0.02645	-0.0082	0.3435	0.0086	FALSE	TRUE
CD28+ CD45RA- CD8dim %T cell	Alzheimer's disease	rs12914989	T	C	T	C	0.1202	3.51998e-07	0.02355	0.0103	0.2226	0.0085	FALSE	TRUE
CD28+ CD45RA- CD8dim %T cell	Alzheimer's disease	rs138232290	A	G	A	G	-2.756	5.87503e-06	0.6074	0.0347	0.3539	0.0374	FALSE	TRUE
CD28+ CD45RA- CD8dim %T cell	Alzheimer's disease	rs138678985	A	G	A	G	0.293	6.35507e-06	0.0648	0.0158	0.5433	0.0259	FALSE	TRUE
CD28+ CD45RA- CD8dim %T cell	Alzheimer's disease	rs139641355	A	G	A	G	-0.8811	9.63696e-06	0.1988	0.018	0.6651	0.0416	FALSE	TRUE
CD28+ CD45RA- CD8dim %T cell	Alzheimer's disease	rs1400032	T	C	T	C	-0.1245	6.21198e-06	0.02751	-0.011	0.2877	0.0103	FALSE	TRUE
CD28+ CD45RA- CD8dim %T cell	Alzheimer's disease	rs147612560	A	G	A	G	4.119	1.52799e-06	0.8553	0.0296	0.4083	0.0358	FALSE	TRUE
CD28+ CD45RA- CD8dim %T cell	Alzheimer's disease	rs17130468	A	G	A	G	0.8535	5.25497e-06	0.1871	0.0372	0.4425	0.0484	FALSE	TRUE
CD28+ CD45RA- CD8dim %T cell	Alzheimer's disease	rs17216040	A	G	A	G	0.4979	8.76395e-06	0.1118	0.0371	0.4051	0.0445	FALSE	TRUE
CD28+ CD45RA- CD8dim %T cell	Alzheimer's disease	rs185416365	T	C	T	C	1.176	6.36708e-06	0.2602	-0.028	0.5121	0.0427	FALSE	TRUE
CD28+ CD45RA- CD8dim %T cell	Alzheimer's disease	rs1975288	G	A	G	A	0.1151	8.73897e-06	0.02586	0.0204	0.01689	0.0085	FALSE	TRUE
CD28+ CD45RA- CD8dim %T cell	Alzheimer's disease	rs2177324	A	G	A	G	-0.5022	5.09495e-06	0.1099	-0.0168	0.497299	0.0248	FALSE	TRUE
CD28+ CD45RA- CD8dim %T cell	Alzheimer's disease	rs34973688	A	C	A	C	-0.1636	2.94802e-06	0.03493	-0.012	0.2858	0.0112	FALSE	TRUE
CD28+ CD45RA- CD8dim %T cell	Alzheimer's disease	rs541367304	A	G	A	G	-2.266	1.735e-20	0.2427	0.0454	0.1875	0.0344	FALSE	TRUE
CD28+ CD45RA- CD8dim %T cell	Alzheimer's disease	rs61744818	A	G	A	G	0.3121	2.58797e-06	0.06628	0.0398	0.0869201	0.0232	FALSE	TRUE
CD28+ CD45RA- CD8dim %T cell	Alzheimer's disease	rs62358725	G	A	G	A	0.1351	2.25902e-07	0.02605	0.0115	0.2166	0.0093	FALSE	TRUE
CD28+ CD45RA- CD8dim %T cell	Alzheimer's disease	rs687264	C	T	C	T	-0.2776	1.67699e-06	0.05787	0.0136	0.3495	0.0146	FALSE	TRUE
CD28+ CD45RA- CD8dim %T cell	Alzheimer's disease	rs72848176	G	A	G	A	-0.5062	1.99701e-07	0.09716	-0.0082	0.6562	0.0185	FALSE	TRUE
CD28+ CD45RA- CD8dim %T cell	Alzheimer's disease	rs73184766	G	A	G	A	-0.2652	1.81999e-06	0.05548	-0.0126	0.5383	0.0204	FALSE	TRUE
CD28+ CD45RA- CD8dim %T cell	Alzheimer's disease	rs74463547	A	C	A	C	0.1623	8.59607e-06	0.03641	0.0016	0.9355	0.02	FALSE	TRUE
CD28+ CD45RA- CD8dim %T cell	Alzheimer's disease	rs76359108	A	G	A	G	-2.955	3.26896e-06	0.6341	0.1285	0.0149699	0.0528	FALSE	TRUE
CD28+ CD45RA- CD8dim %T cell	Alzheimer's disease	rs9912771	T	C	T	C	0.196	5.22204e-06	0.04296	-0.0006	0.9704	0.0156	FALSE	TRUE
CD4 on CD28+ CD4+	Alzheimer's disease	rs10138570	G	A	G	A	0.1252	5.01603e-06	0.02739	0.0112	0.1728	0.0082	FALSE	TRUE
CD4 on CD28+ CD4+	Alzheimer's disease	rs1079042	A	G	A	G	-0.1612	8.684e-06	0.03618	0.0236	0.0739401	0.0132	FALSE	TRUE
CD4 on CD28+ CD4+	Alzheimer's disease	rs114729093	C	T	C	T	-0.5661	1.59901e-06	0.1177	0.0079	0.8358	0.0384	FALSE	TRUE
CD4 on CD28+ CD4+	Alzheimer's disease	rs11615628	A	G	A	G	-0.2032	1.70801e-10	0.03171	0.0085	0.3482	0.009	FALSE	TRUE
CD4 on CD28+ CD4+	Alzheimer's disease	rs117058083	G	A	G	A	-0.2194	5.37799e-06	0.04813	0.019	0.379	0.0216	FALSE	TRUE
CD4 on CD28+ CD4+	Alzheimer's disease	rs12471945	T	G	T	G	0.5682	2.943e-06	0.1213	-0.019	0.3787	0.0216	FALSE	TRUE
CD4 on CD28+ CD4+	Alzheimer's disease	rs12664217	T	C	T	C	0.1381	8.76395e-06	0.031	0.0229	0.0412895	0.0112	FALSE	TRUE
CD4 on CD28+ CD4+	Alzheimer's disease	rs140084476	A	G	A	G	0.7885	2.852e-06	0.1681	0.0001	0.9971	0.0325	FALSE	TRUE
CD4 on CD28+ CD4+	Alzheimer's disease	rs146956135	C	A	C	A	-0.3103	6.15304e-06	0.06852	0.0009	0.972	0.0267	FALSE	TRUE
CD4 on CD28+ CD4+	Alzheimer's disease	rs17143738	G	A	G	A	-0.2421	1.20501e-06	0.04976	-0.0043	0.8064	0.0177	FALSE	TRUE
CD4 on CD28+ CD4+	Alzheimer's disease	rs1762718	A	G	A	G	-0.1676	5.873e-06	0.03692	-0.0205	0.0537304	0.0106	FALSE	TRUE
CD4 on CD28+ CD4+	Alzheimer's disease	rs2844608	T	C	T	C	0.1884	9.03504e-10	0.03065	-0.0197	0.0184098	0.0084	FALSE	TRUE
CD4 on CD28+ CD4+	Alzheimer's disease	rs3130215	G	A	G	A	-0.1595	4.32404e-07	0.03148	0.0159	0.0545695	0.0083	FALSE	TRUE
CD4 on CD28+ CD4+	Alzheimer's disease	rs62568944	A	G	A	G	0.1788	1.022e-06	0.03651	0.0092	0.4282	0.0116	FALSE	TRUE
CD4 on CD28+ CD4+	Alzheimer's disease	rs634639	A	G	A	G	0.2966	9.977e-06	0.06702	0.0106	0.5531	0.0179	FALSE	TRUE
CD4 on CD28+ CD4+	Alzheimer's disease	rs79998393	A	C	A	C	1.44	8.92195e-06	0.3237	0.0053	0.8918	0.039	FALSE	TRUE
CD4 on CD28+ CD4+	Alzheimer's disease	rs831657	G	A	G	A	0.144	2.32097e-06	0.03043	0.0149	0.1598	0.0106	FALSE	TRUE
CD4 on CD28+ CD4+	Alzheimer's disease	rs9906657	A	G	A	G	-0.2299	1.276e-06	0.04736	-0.002	0.8726	0.0125	FALSE	TRUE
CD3 on CD45RA+ CD4+	Alzheimer's disease	rs10139012	C	T	C	T	-0.1401	1.88999e-06	0.02935	0.0053	0.5608	0.0091	FALSE	TRUE
CD3 on CD45RA+ CD4+	Alzheimer's disease	rs12512585	T	G	T	G	0.1839	3.47e-06	0.03955	0.0152	0.1699	0.0111	FALSE	TRUE
CD3 on CD45RA+ CD4+	Alzheimer's disease	rs12921174	C	T	C	T	-0.2044	1.492e-09	0.03371	-0.0167	0.04394	0.0083	FALSE	TRUE
CD3 on CD45RA+ CD4+	Alzheimer's disease	rs141784254	G	A	G	A	-1.015	2.62198e-06	0.2156	-0.0292	0.586001	0.0536	FALSE	TRUE
CD3 on CD45RA+ CD4+	Alzheimer's disease	rs143262728	T	C	T	C	1.665	6.64293e-06	0.3688	-0.0113	0.7845	0.0412	FALSE	TRUE
CD3 on CD45RA+ CD4+	Alzheimer's disease	rs144004160	T	C	T	C	-0.9033	7.15402e-06	0.2009	-0.0463	0.3313	0.0476	FALSE	TRUE
CD3 on CD45RA+ CD4+	Alzheimer's disease	rs146330992	T	C	T	C	0.2214	9.96208e-06	0.05003	-0.0511	0.1255	0.0333	FALSE	TRUE
CD3 on CD45RA+ CD4+	Alzheimer's disease	rs150857694	C	T	C	T	-0.2962	9.63407e-06	0.06682	0.0291	0.5234	0.0456	FALSE	TRUE
CD3 on CD45RA+ CD4+	Alzheimer's disease	rs187281020	G	A	G	A	-0.4837	1.83502e-06	0.1012	0.087	0.2148	0.0701	FALSE	TRUE
CD3 on CD45RA+ CD4+	Alzheimer's disease	rs2714019	T	C	T	C	-0.1279	8.26e-06	0.02863	0.003	0.7322	0.0086	FALSE	TRUE
CD3 on CD45RA+ CD4+	Alzheimer's disease	rs2808525	T	C	T	C	0.1474	2.45997e-06	0.03123	0.0044	0.6131	0.0086	FALSE	TRUE
CD3 on CD45RA+ CD4+	Alzheimer's disease	rs2839523	A	C	A	C	-0.1244	5.68696e-06	0.02736	-0.0033	0.692299	0.0082	FALSE	TRUE
CD3 on CD45RA+ CD4+	Alzheimer's disease	rs2949661	T	C	T	C	0.6441	1.65577e-133	0.02485	0.0175	0.0384096	0.0084	FALSE	TRUE
CD3 on CD45RA+ CD4+	Alzheimer's disease	rs34135810	C	T	C	T	-0.6745	4.32504e-06	0.1465	-0.0269	0.4287	0.0339	FALSE	TRUE
CD3 on CD45RA+ CD4+	Alzheimer's disease	rs4396110	A	G	A	G	-0.1391	4.11898e-07	0.02741	0.0008	0.9304	0.0087	FALSE	TRUE
CD3 on CD45RA+ CD4+	Alzheimer's disease	rs4657649	C	T	C	T	0.5386	1.51008e-18	0.06087	0.0198	0.1851	0.015	FALSE	TRUE
CD3 on CD45RA+ CD4+	Alzheimer's disease	rs4683146	A	G	A	G	-0.1213	8.76395e-06	0.02724	0.0004	0.9603	0.0082	FALSE	TRUE
CD3 on CD45RA+ CD4+	Alzheimer's disease	rs61814872	T	C	T	C	0.3132	1.98198e-12	0.04432	-0.0287	0.0320199	0.0134	FALSE	TRUE
CD3 on CD45RA+ CD4+	Alzheimer's disease	rs62029957	A	G	A	G	0.1955	7.46896e-06	0.04357	0.0236	0.487401	0.034	FALSE	TRUE
CD3 on CD45RA+ CD4+	Alzheimer's disease	rs62430462	T	C	T	C	-0.1676	7.377e-06	0.03732	0.0004	0.9758	0.0119	FALSE	TRUE
CD3 on CD45RA+ CD4+	Alzheimer's disease	rs6751481	C	T	C	T	-0.1281	3.37497e-06	0.02752	0.0042	0.6083	0.0083	FALSE	TRUE
CD3 on CD45RA+ CD4+	Alzheimer's disease	rs72729208	A	G	A	G	0.2632	3.54503e-06	0.05665	-0.0419	0.0691003	0.0231	FALSE	TRUE
CD3 on CD45RA+ CD4+	Alzheimer's disease	rs72817532	G	A	G	A	0.4112	7.74408e-07	0.08302	-0.0039	0.9255	0.0414	FALSE	TRUE
CD3 on CD45RA+ CD4+	Alzheimer's disease	rs74620952	C	T	C	T	-1.299	1.502e-07	0.2467	0.0257	0.3168	0.0257	FALSE	TRUE
CD3 on CD45RA+ CD4+	Alzheimer's disease	rs7530127	C	T	C	T	-0.1375	8.10905e-07	0.02781	-0.0068	0.4365	0.0087	FALSE	TRUE
CD3 on CD45RA+ CD4+	Alzheimer's disease	rs7594170	G	A	G	A	-0.1421	7.94292e-06	0.03175	0.0096	0.2377	0.0081	FALSE	TRUE
CD3 on CD45RA+ CD4+	Alzheimer's disease	rs76066554	T	C	T	C	-1.067	9.82992e-07	0.2175	-0.0287	0.4956	0.0422	FALSE	TRUE
CD3 on CD45RA+ CD4+	Alzheimer's disease	rs78042544	G	A	G	A	0.4208	5.53694e-06	0.09244	0.0194	0.3708	0.0217	FALSE	TRUE
CD3 on CD45RA+ CD4+	Alzheimer's disease	rs79179998	A	G	A	G	0.2304	1.23197e-11	0.03386	-0.0143	0.2653	0.0129	FALSE	TRUE
CD3 on CD45RA+ CD4+	Alzheimer's disease	rs79844317	T	C	T	C	-0.4031	3.95003e-06	0.08719	0.0769	0.0289601	0.0352	FALSE	TRUE
FSC-A on HLA DR+ T cell	Alzheimer's disease	rs10142082	G	A	G	A	-0.1511	5.18096e-06	0.03309	-0.0022	0.8252	0.0099	FALSE	TRUE
FSC-A on HLA DR+ T cell	Alzheimer's disease	rs10183967	C	A	C	A	-0.1412	9.1829e-08	0.02636	-0.0025	0.763199	0.0083	FALSE	TRUE
FSC-A on HLA DR+ T cell	Alzheimer's disease	rs117916891	A	G	A	G	0.3752	7.11607e-06	0.08341	-0.0113	0.626299	0.0232	FALSE	TRUE
FSC-A on HLA DR+ T cell	Alzheimer's disease	rs144027086	A	G	A	G	2.546	4.89497e-06	0.5562	0.0122	0.7981	0.0479	FALSE	TRUE
FSC-A on HLA DR+ T cell	Alzheimer's disease	rs144869562	G	A	G	A	3.046	8.34699e-07	0.617	-0.0147	0.7616	0.0484	FALSE	TRUE
FSC-A on HLA DR+ T cell	Alzheimer's disease	rs182033296	G	A	G	A	1.706	5.93895e-07	0.3408	0.0032	0.9541	0.0557	FALSE	TRUE
FSC-A on HLA DR+ T cell	Alzheimer's disease	rs2467240	C	T	C	T	-0.1609	6.47903e-06	0.03561	0.0089	0.3234	0.009	FALSE	TRUE
FSC-A on HLA DR+ T cell	Alzheimer's disease	rs3008396	A	G	A	G	0.7995	5.72902e-06	0.1759	0.0262	0.5099	0.0397	FALSE	TRUE
FSC-A on HLA DR+ T cell	Alzheimer's disease	rs3114972	G	T	G	T	0.1517	3.82798e-06	0.03277	-0.0152	0.1298	0.01	FALSE	TRUE
FSC-A on HLA DR+ T cell	Alzheimer's disease	rs62074942	A	G	A	G	-0.1661	1.46501e-06	0.03442	0.0004	0.977	0.0147	FALSE	TRUE
FSC-A on HLA DR+ T cell	Alzheimer's disease	rs66481406	C	T	C	T	-0.1398	3.06203e-06	0.02991	0.0047	0.6367	0.01	FALSE	TRUE
FSC-A on HLA DR+ T cell	Alzheimer's disease	rs720390	A	G	A	G	-0.1179	7.31695e-06	0.02625	0.0076	0.3653	0.0084	FALSE	TRUE
FSC-A on HLA DR+ T cell	Alzheimer's disease	rs73715304	A	C	A	C	0.1522	8.046e-06	0.03404	0.025	0.0236701	0.0111	FALSE	TRUE
FSC-A on HLA DR+ T cell	Alzheimer's disease	rs76260706	G	A	G	A	0.9887	4.66101e-06	0.2155	-0.007	0.8059	0.0284	FALSE	TRUE
FSC-A on HLA DR+ T cell	Alzheimer's disease	rs7964408	C	T	C	T	0.1441	8.30501e-06	0.03228	0.0056	0.5051	0.0084	FALSE	TRUE
FSC-A on HLA DR+ T cell	Alzheimer's disease	rs80093546	G	T	G	T	0.3733	2.94598e-06	0.07971	0.0278	0.3936	0.0326	FALSE	TRUE
SSC-A on HLA DR+ CD8br	Alzheimer's disease	rs10145270	A	G	A	G	-0.1226	7.43207e-06	0.02731	0.015	0.0742301	0.0084	FALSE	TRUE
SSC-A on HLA DR+ CD8br	Alzheimer's disease	rs1017102	C	A	C	A	0.1765	4.27996e-06	0.03832	0.0106	0.4169	0.0131	FALSE	TRUE
SSC-A on HLA DR+ CD8br	Alzheimer's disease	rs114955332	C	A	C	A	-0.6337	6.85094e-06	0.1406	0.0175	0.5988	0.0333	FALSE	TRUE
SSC-A on HLA DR+ CD8br	Alzheimer's disease	rs117767550	T	G	T	G	-0.3058	3.36001e-06	0.06567	0.0174	0.537901	0.0283	FALSE	TRUE
SSC-A on HLA DR+ CD8br	Alzheimer's disease	rs117967604	C	A	C	A	0.3688	9.71807e-06	0.08324	-0.0332	0.3672	0.0368	FALSE	TRUE
SSC-A on HLA DR+ CD8br	Alzheimer's disease	rs11801958	T	G	T	G	0.1397	1.61499e-07	0.0266	-0.0044	0.6076	0.0085	FALSE	TRUE
SSC-A on HLA DR+ CD8br	Alzheimer's disease	rs142804909	A	G	A	G	0.6154	1.34499e-06	0.1271	-0.0506	0.1956	0.0391	FALSE	TRUE
SSC-A on HLA DR+ CD8br	Alzheimer's disease	rs1552390	T	C	T	C	0.1178	9.31794e-06	0.02654	-0.0114	0.1642	0.0082	FALSE	TRUE
[truncated: 13,336 more rows]

## Sheet: Table S3
Table S3: Extracted SNP of MR analysis( Blood metabolites to Alzheimer's disease)
exposure	outcome	SNP	effect_allele.exposure	other_allele.exposure	effect_allele.outcome	other_allele.outcome	beta.exposure	se.exposure	pval.exposure	beta.outcome	pval.outcome	se.outcome	palindromic	mr_keep
3-formylindole levels	Alzheimer's disease	rs10000291	T	C	T	C	0.0954508	0.0151521	2.98559e-10	-0.0081	0.0084	0.3327	FALSE	TRUE
3-formylindole levels	Alzheimer's disease	rs1007889	G	T	G	T	0.0741001	0.0155021	1.75304e-06	-0.0047	0.0087	0.5881	FALSE	TRUE
3-formylindole levels	Alzheimer's disease	rs10839612	T	C	T	C	0.0651796	0.0145466	7.4379e-06	-0.0119	0.0081	0.1415	FALSE	TRUE
3-formylindole levels	Alzheimer's disease	rs11056372	A	G	A	G	-0.165652	0.035379	2.83795e-06	0.0192	0.0203	0.3423	FALSE	TRUE
3-formylindole levels	Alzheimer's disease	rs11647808	A	C	A	C	0.177857	0.026839	3.42996e-11	-0.0109	0.0151	0.4698	FALSE	TRUE
3-formylindole levels	Alzheimer's disease	rs1165211	C	T	C	T	0.0995025	0.015874	3.65099e-10	0.0062	0.0089	0.4863	FALSE	TRUE
3-formylindole levels	Alzheimer's disease	rs1230319	G	A	G	A	-0.198879	0.0448536	9.25219e-06	-0.0135	0.0244	0.580899	FALSE	TRUE
3-formylindole levels	Alzheimer's disease	rs139251025	C	A	C	A	-0.292847	0.0623612	2.65317e-06	-0.0209	0.0367	0.5692	FALSE	TRUE
3-formylindole levels	Alzheimer's disease	rs142582686	T	G	T	G	0.167542	0.0362843	3.88428e-06	-0.033	0.0217	0.1282	FALSE	TRUE
3-formylindole levels	Alzheimer's disease	rs1431143	G	A	G	A	0.0730795	0.0159185	4.41412e-06	-0.006	0.0089	0.5014	FALSE	TRUE
3-formylindole levels	Alzheimer's disease	rs143393480	T	G	T	G	0.376117	0.0765881	9.06562e-07	0.0218	0.0431	0.611999	FALSE	TRUE
3-formylindole levels	Alzheimer's disease	rs149767042	A	G	A	G	0.214721	0.0478784	7.3014e-06	0.0704	0.0257	0.00610295	FALSE	TRUE
3-formylindole levels	Alzheimer's disease	rs182215158	C	T	C	T	0.332045	0.0693486	1.68409e-06	0.0403	0.0402	0.3169	FALSE	TRUE
3-formylindole levels	Alzheimer's disease	rs2977995	G	A	G	A	0.275053	0.0164742	1.403e-62	-0.0001	0.0093	0.9908	FALSE	TRUE
3-formylindole levels	Alzheimer's disease	rs4502257	T	C	T	C	0.148732	0.0331573	7.2696e-06	-0.0023	0.0192	0.9042	FALSE	TRUE
3-formylindole levels	Alzheimer's disease	rs510402	A	G	A	G	-0.195605	0.0401108	1.07919e-06	0.0035	0.0223	0.8751	FALSE	TRUE
3-formylindole levels	Alzheimer's disease	rs55973025	A	G	A	G	-0.11599	0.0260638	8.57847e-06	-0.003	0.0146	0.8374	FALSE	TRUE
3-formylindole levels	Alzheimer's disease	rs5751777	T	C	T	C	0.382782	0.0141867	2.41856e-160	-0.0002	0.0083	0.9761	FALSE	TRUE
3-formylindole levels	Alzheimer's disease	rs57909274	A	C	A	C	-0.0772349	0.0170737	6.0791e-06	-0.0024	0.0096	0.7984	FALSE	TRUE
3-formylindole levels	Alzheimer's disease	rs58487738	A	G	A	G	0.163359	0.0340601	1.617e-06	-0.0026	0.019	0.8892	FALSE	TRUE
3-formylindole levels	Alzheimer's disease	rs678624	A	G	A	G	0.0764794	0.0165692	3.91669e-06	0.003	0.0095	0.7546	FALSE	TRUE
3-formylindole levels	Alzheimer's disease	rs72674255	C	T	C	T	0.262222	0.0502074	1.76249e-07	0.0032	0.0293	0.9138	FALSE	TRUE
3-formylindole levels	Alzheimer's disease	rs73141535	C	T	C	T	0.0906226	0.0203134	8.1492e-06	-0.0066	0.0112	0.555199	FALSE	TRUE
3-formylindole levels	Alzheimer's disease	rs76466844	C	T	C	T	0.232961	0.05168	6.55184e-06	0.0136	0.0297	0.6468	FALSE	TRUE
3-formylindole levels	Alzheimer's disease	rs77599898	A	G	A	G	0.160659	0.0360271	8.21922e-06	-0.0102	0.0206	0.6209	FALSE	TRUE
3-formylindole levels	Alzheimer's disease	rs77904614	G	A	G	A	-0.105802	0.0233965	6.12257e-06	0.0159	0.0129	0.2192	FALSE	TRUE
3-formylindole levels	Alzheimer's disease	rs7842755	C	A	C	A	0.084209	0.0189131	8.49049e-06	0.0056	0.0106	0.5978	FALSE	TRUE
Glycerol to carnitine ratio	Alzheimer's disease	rs10212037	A	G	A	G	0.141588	0.0317246	8.08096e-06	0.0077	0.019	0.684	FALSE	TRUE
Glycerol to carnitine ratio	Alzheimer's disease	rs11107955	T	C	T	C	-0.112289	0.0226006	6.74978e-07	0.0033	0.0136	0.8103	FALSE	TRUE
Glycerol to carnitine ratio	Alzheimer's disease	rs116820418	T	C	T	C	0.234256	0.0494205	2.1365e-06	-0.015	0.0284	0.5974	FALSE	TRUE
Glycerol to carnitine ratio	Alzheimer's disease	rs117127331	T	C	T	C	-0.0915435	0.0201292	5.42135e-06	-0.0223	0.0123	0.0705001	FALSE	TRUE
Glycerol to carnitine ratio	Alzheimer's disease	rs1171616	T	G	T	G	-0.118696	0.0163384	3.73543e-13	-0.0075	0.0096	0.4337	FALSE	TRUE
Glycerol to carnitine ratio	Alzheimer's disease	rs12505581	G	A	G	A	0.111117	0.0229816	1.33108e-06	-0.006	0.0138	0.663399	FALSE	TRUE
Glycerol to carnitine ratio	Alzheimer's disease	rs13335139	G	A	G	A	0.779964	0.163096	1.73355e-06	-0.0974	0.0662	0.1412	FALSE	TRUE
Glycerol to carnitine ratio	Alzheimer's disease	rs146885651	T	C	T	C	1.74899	0.385474	5.69938e-06	0.0146	0.0428	0.7329	FALSE	TRUE
Glycerol to carnitine ratio	Alzheimer's disease	rs184286424	A	C	A	C	-0.224617	0.0502389	7.78633e-06	-0.0074	0.0303	0.8059	FALSE	TRUE
Glycerol to carnitine ratio	Alzheimer's disease	rs1888859	G	T	G	T	0.0614912	0.0136716	6.86816e-06	-0.0006	0.0082	0.9386	FALSE	TRUE
Glycerol to carnitine ratio	Alzheimer's disease	rs2229322	T	C	T	C	0.098218	0.0220845	8.69281e-06	-0.0129	0.0135	0.3373	FALSE	TRUE
Glycerol to carnitine ratio	Alzheimer's disease	rs2299168	C	T	C	T	0.215748	0.047884	6.61749e-06	0.0064	0.0254	0.8022	FALSE	TRUE
Glycerol to carnitine ratio	Alzheimer's disease	rs34437475	A	G	A	G	0.0757113	0.0167952	6.54716e-06	-0.0142	0.0102	0.1656	FALSE	TRUE
Glycerol to carnitine ratio	Alzheimer's disease	rs35298690	C	T	C	T	0.0815	0.0162866	5.61205e-07	0.0017	0.01	0.8623	FALSE	TRUE
Glycerol to carnitine ratio	Alzheimer's disease	rs61621666	G	A	G	A	0.145927	0.0303121	1.4783e-06	-0.0127	0.0186	0.4952	FALSE	TRUE
Glycerol to carnitine ratio	Alzheimer's disease	rs62116851	G	A	G	A	-0.109047	0.0238058	4.63465e-06	0.0181	0.0162	0.2651	FALSE	TRUE
Glycerol to carnitine ratio	Alzheimer's disease	rs72819866	C	T	C	T	0.115998	0.026146	9.14064e-06	0.0056	0.0161	0.7271	FALSE	TRUE
Glycerol to carnitine ratio	Alzheimer's disease	rs7327786	G	A	G	A	0.102037	0.0224847	5.67724e-06	0.0055	0.0136	0.6862	FALSE	TRUE
Glycerol to carnitine ratio	Alzheimer's disease	rs75960481	A	G	A	G	0.251149	0.0535661	2.75104e-06	-0.0162	0.0337	0.630001	FALSE	TRUE
Glycerol to carnitine ratio	Alzheimer's disease	rs7705826	G	T	G	T	-0.0959775	0.018058	1.06691e-07	-0.0197	0.0109	0.0689398	FALSE	TRUE
Glycerol to carnitine ratio	Alzheimer's disease	rs78819701	C	T	C	T	0.171753	0.0357783	1.58287e-06	-0.0095	0.0228	0.6758	FALSE	TRUE
Glycerol to carnitine ratio	Alzheimer's disease	rs8061003	G	A	G	A	0.066051	0.0141994	3.29253e-06	0.0068	0.0086	0.4255	FALSE	TRUE
17alpha-hydroxypregnanolone glucuronide levels	Alzheimer's disease	rs1000136	T	C	T	C	-0.0733014	0.0156064	2.64178e-06	-0.0175	0.0082	0.0324803	FALSE	TRUE
17alpha-hydroxypregnanolone glucuronide levels	Alzheimer's disease	rs113723915	C	T	C	T	0.14444	0.0321638	7.09744e-06	0.0087	0.0166	0.6002	FALSE	TRUE
17alpha-hydroxypregnanolone glucuronide levels	Alzheimer's disease	rs114891569	T	G	T	G	0.524696	0.0988098	1.09526e-07	-0.0194	0.0455	0.6691	FALSE	TRUE
17alpha-hydroxypregnanolone glucuronide levels	Alzheimer's disease	rs117242229	C	A	C	A	-0.282721	0.0592917	1.85781e-06	0.0107	0.0314	0.7326	FALSE	TRUE
17alpha-hydroxypregnanolone glucuronide levels	Alzheimer's disease	rs118134155	C	A	C	A	-0.232265	0.0483736	1.57489e-06	0.0019	0.0294	0.9479	FALSE	TRUE
17alpha-hydroxypregnanolone glucuronide levels	Alzheimer's disease	rs12372336	G	T	G	T	-0.0757041	0.0169643	8.09843e-06	0.0072	0.0088	0.4132	FALSE	TRUE
17alpha-hydroxypregnanolone glucuronide levels	Alzheimer's disease	rs12989207	T	C	T	C	0.108214	0.0228032	2.07921e-06	-0.0061	0.0119	0.609101	FALSE	TRUE
17alpha-hydroxypregnanolone glucuronide levels	Alzheimer's disease	rs142131421	A	G	A	G	0.681648	0.0290974	2.30179e-121	-0.0372	0.0169	0.0282299	FALSE	TRUE
17alpha-hydroxypregnanolone glucuronide levels	Alzheimer's disease	rs145323940	C	T	C	T	-0.347083	0.0758077	4.68388e-06	0.0228	0.0358	0.523701	FALSE	TRUE
17alpha-hydroxypregnanolone glucuronide levels	Alzheimer's disease	rs149001017	A	G	A	G	0.615174	0.137459	7.62907e-06	-0.0446	0.0671	0.5061	FALSE	TRUE
17alpha-hydroxypregnanolone glucuronide levels	Alzheimer's disease	rs1574706	G	A	G	A	0.221115	0.0499215	9.45612e-06	-0.0064	0.0252	0.8	FALSE	TRUE
17alpha-hydroxypregnanolone glucuronide levels	Alzheimer's disease	rs17678628	C	T	C	T	0.195708	0.0398777	9.21537e-07	0.0096	0.0207	0.641	FALSE	TRUE
17alpha-hydroxypregnanolone glucuronide levels	Alzheimer's disease	rs17719944	G	A	G	A	0.130072	0.0277789	2.83536e-06	0.0255	0.0147	0.0823	FALSE	TRUE
17alpha-hydroxypregnanolone glucuronide levels	Alzheimer's disease	rs183318671	T	G	T	G	0.462386	0.0903333	3.07692e-07	-0.0138	0.0466	0.768	FALSE	TRUE
17alpha-hydroxypregnanolone glucuronide levels	Alzheimer's disease	rs191145320	T	C	T	C	-0.300691	0.0671361	7.50524e-06	-0.0825	0.0348	0.0176299	FALSE	TRUE
17alpha-hydroxypregnanolone glucuronide levels	Alzheimer's disease	rs2433279	G	T	G	T	-0.109732	0.0243898	6.82455e-06	0.0041	0.0127	0.746799	FALSE	TRUE
17alpha-hydroxypregnanolone glucuronide levels	Alzheimer's disease	rs2468872	A	G	A	G	-0.0764143	0.0158682	1.46774e-06	-0.0112	0.0082	0.1717	FALSE	TRUE
17alpha-hydroxypregnanolone glucuronide levels	Alzheimer's disease	rs37482	A	G	A	G	0.111391	0.0236813	2.55425e-06	0.0191	0.0122	0.1184	FALSE	TRUE
17alpha-hydroxypregnanolone glucuronide levels	Alzheimer's disease	rs3785912	T	C	T	C	-0.0787216	0.0165527	1.97643e-06	-0.0002	0.0085	0.9789	FALSE	TRUE
17alpha-hydroxypregnanolone glucuronide levels	Alzheimer's disease	rs4713420	T	G	T	G	-0.100635	0.0211232	1.89609e-06	0.0246	0.0111	0.02646	FALSE	TRUE
17alpha-hydroxypregnanolone glucuronide levels	Alzheimer's disease	rs540582	C	T	C	T	-0.0993954	0.0157566	2.82314e-10	-0.0058	0.0083	0.4836	FALSE	TRUE
17alpha-hydroxypregnanolone glucuronide levels	Alzheimer's disease	rs60865673	C	T	C	T	0.120178	0.0268285	7.48208e-06	0.0138	0.0138	0.3166	FALSE	TRUE
17alpha-hydroxypregnanolone glucuronide levels	Alzheimer's disease	rs62084022	T	C	T	C	-0.0804557	0.017639	5.08527e-06	-0.0149	0.0091	0.1013	FALSE	TRUE
17alpha-hydroxypregnanolone glucuronide levels	Alzheimer's disease	rs7171867	G	T	G	T	-0.115576	0.0252425	4.6806e-06	-0.0037	0.0133	0.778001	FALSE	TRUE
17alpha-hydroxypregnanolone glucuronide levels	Alzheimer's disease	rs73194752	T	C	T	C	-0.103398	0.0224304	4.03185e-06	-0.0126	0.0115	0.2729	FALSE	TRUE
17alpha-hydroxypregnanolone glucuronide levels	Alzheimer's disease	rs9527	T	C	T	C	0.0891597	0.0179007	6.33283e-07	0.0123	0.0093	0.1865	FALSE	TRUE
3-methyl-2-oxovalerate to 4-methyl-2-oxopentanoate ratio	Alzheimer's disease	rs1000141	T	C	T	C	0.0734663	0.0154065	1.85579e-06	0.0012	0.0081	0.8867	FALSE	TRUE
3-methyl-2-oxovalerate to 4-methyl-2-oxopentanoate ratio	Alzheimer's disease	rs10860876	C	T	C	T	-0.109361	0.0227493	1.53024e-06	-0.016	0.0121	0.1872	FALSE	TRUE
3-methyl-2-oxovalerate to 4-methyl-2-oxopentanoate ratio	Alzheimer's disease	rs113732730	T	G	T	G	0.161064	0.0357767	6.73436e-06	-0.0074	0.0181	0.6832	FALSE	TRUE
3-methyl-2-oxovalerate to 4-methyl-2-oxopentanoate ratio	Alzheimer's disease	rs116919726	A	C	A	C	0.122495	0.0274008	7.80343e-06	0.0168	0.0147	0.2542	FALSE	TRUE
3-methyl-2-oxovalerate to 4-methyl-2-oxopentanoate ratio	Alzheimer's disease	rs12417993	C	T	C	T	-0.0885577	0.0197457	7.29481e-06	-0.0069	0.0104	0.5077	FALSE	TRUE
3-methyl-2-oxovalerate to 4-methyl-2-oxopentanoate ratio	Alzheimer's disease	rs12737655	A	G	A	G	-0.148867	0.0332605	7.61288e-06	-0.0439	0.0181	0.0154099	FALSE	TRUE
3-methyl-2-oxovalerate to 4-methyl-2-oxopentanoate ratio	Alzheimer's disease	rs13381382	T	C	T	C	-0.0748896	0.0162225	3.90436e-06	0.0044	0.0085	0.605399	FALSE	TRUE
3-methyl-2-oxovalerate to 4-methyl-2-oxopentanoate ratio	Alzheimer's disease	rs141588879	G	A	G	A	0.178622	0.0401743	8.74053e-06	-0.0179	0.0217	0.4091	FALSE	TRUE
3-methyl-2-oxovalerate to 4-methyl-2-oxopentanoate ratio	Alzheimer's disease	rs142722792	T	C	T	C	0.227479	0.0473106	1.52294e-06	-0.0027	0.0258	0.9159	FALSE	TRUE
3-methyl-2-oxovalerate to 4-methyl-2-oxopentanoate ratio	Alzheimer's disease	rs146630123	T	G	T	G	-0.324337	0.0655226	7.42135e-07	-0.0667	0.0341	0.0503396	FALSE	TRUE
3-methyl-2-oxovalerate to 4-methyl-2-oxopentanoate ratio	Alzheimer's disease	rs191675623	T	C	T	C	0.145929	0.0305448	1.77437e-06	-0.0223	0.0172	0.1954	FALSE	TRUE
3-methyl-2-oxovalerate to 4-methyl-2-oxopentanoate ratio	Alzheimer's disease	rs2164029	G	A	G	A	-0.0733352	0.0162919	6.75265e-06	0.0006	0.0086	0.9406	FALSE	TRUE
3-methyl-2-oxovalerate to 4-methyl-2-oxopentanoate ratio	Alzheimer's disease	rs2395845	A	C	A	C	-0.121801	0.0269548	6.22104e-06	0.0051	0.014	0.7168	FALSE	TRUE
3-methyl-2-oxovalerate to 4-methyl-2-oxopentanoate ratio	Alzheimer's disease	rs4689805	A	G	A	G	0.0821165	0.0183677	7.79603e-06	-0.0219	0.01	0.0286801	FALSE	TRUE
3-methyl-2-oxovalerate to 4-methyl-2-oxopentanoate ratio	Alzheimer's disease	rs73102110	C	A	C	A	-0.219967	0.0475091	3.6565e-06	0.0003	0.0243	0.9908	FALSE	TRUE
3-methyl-2-oxovalerate to 4-methyl-2-oxopentanoate ratio	Alzheimer's disease	rs73225991	A	G	A	G	-0.095493	0.0212534	7.02045e-06	-0.0001	0.0111	0.9963	FALSE	TRUE
3-methyl-2-oxovalerate to 4-methyl-2-oxopentanoate ratio	Alzheimer's disease	rs75204119	A	G	A	G	0.280451	0.0629614	8.41518e-06	0.0288	0.0337	0.392	FALSE	TRUE
3-methyl-2-oxovalerate to 4-methyl-2-oxopentanoate ratio	Alzheimer's disease	rs76178213	T	C	T	C	-0.279018	0.0630683	9.68677e-06	-0.0262	0.0323	0.4161	FALSE	TRUE
3-methyl-2-oxovalerate to 4-methyl-2-oxopentanoate ratio	Alzheimer's disease	rs7779635	C	T	C	T	-0.0756897	0.0168741	7.27274e-06	-0.003	0.0091	0.7462	FALSE	TRUE
3-methyl-2-oxovalerate to 4-methyl-2-oxopentanoate ratio	Alzheimer's disease	rs8030711	C	T	C	T	-0.0949177	0.0213963	9.15717e-06	0.009	0.0114	0.4292	FALSE	TRUE
Glycerate levels	Alzheimer's disease	rs1000156	G	A	G	A	-0.0892357	0.0188882	2.30793e-06	-0.0079	0.0101	0.4321	FALSE	TRUE
Glycerate levels	Alzheimer's disease	rs1025628	A	G	A	G	0.151408	0.0322248	2.62096e-06	-0.02	0.0182	0.2709	FALSE	TRUE
Glycerate levels	Alzheimer's disease	rs112748757	T	G	T	G	-0.248552	0.0544456	4.99134e-06	0.0314	0.0301	0.2962	FALSE	TRUE
Glycerate levels	Alzheimer's disease	rs1133621	T	G	T	G	0.107914	0.0240638	7.30891e-06	0.015	0.0134	0.2627	FALSE	TRUE
Glycerate levels	Alzheimer's disease	rs11766962	C	T	C	T	-0.0899609	0.0186233	1.36156e-06	-0.0002	0.0099	0.9822	FALSE	TRUE
Glycerate levels	Alzheimer's disease	rs117731450	A	G	A	G	-0.244065	0.0551232	9.52758e-06	-0.0107	0.0296	0.7177	FALSE	TRUE
Glycerate levels	Alzheimer's disease	rs138250602	G	T	G	T	-0.156885	0.0354448	9.59188e-06	0.0137	0.0189	0.4689	FALSE	TRUE
Glycerate levels	Alzheimer's disease	rs141097695	A	G	A	G	-0.222358	0.0485143	4.57614e-06	-0.0063	0.0289	0.8269	FALSE	TRUE
Glycerate levels	Alzheimer's disease	rs1449141	C	A	C	A	-0.0794245	0.0170941	3.37909e-06	0.0151	0.009	0.0917593	FALSE	TRUE
Glycerate levels	Alzheimer's disease	rs145856120	T	C	T	C	-0.281891	0.0605964	3.28818e-06	0.023	0.0323	0.4757	FALSE	TRUE
Glycerate levels	Alzheimer's disease	rs149160598	A	G	A	G	-0.317679	0.06091	1.83279e-07	0.0038	0.0326	0.9064	FALSE	TRUE
Glycerate levels	Alzheimer's disease	rs149266774	T	G	T	G	-0.257202	0.0560545	4.4659e-06	0.0413	0.0283	0.1444	FALSE	TRUE
Glycerate levels	Alzheimer's disease	rs183630170	C	A	C	A	0.305391	0.0668327	4.88928e-06	0.0335	0.0328	0.3085	FALSE	TRUE
Glycerate levels	Alzheimer's disease	rs2279694	C	T	C	T	0.0737581	0.016588	8.72972e-06	-0.009	0.0089	0.309	FALSE	TRUE
Glycerate levels	Alzheimer's disease	rs2394872	C	A	C	A	-0.129378	0.0263373	8.99835e-07	-0.0185	0.0143	0.1946	FALSE	TRUE
Glycerate levels	Alzheimer's disease	rs2540970	C	T	C	T	0.0731367	0.0162715	6.96423e-06	0.0046	0.0086	0.5887	FALSE	TRUE
Glycerate levels	Alzheimer's disease	rs3733487	A	C	A	C	-0.309579	0.0682205	5.68122e-06	-0.0113	0.0331	0.7327	FALSE	TRUE
Glycerate levels	Alzheimer's disease	rs3814027	T	C	T	C	0.0822872	0.0158679	2.15145e-07	-0.0134	0.0086	0.1175	FALSE	TRUE
Glycerate levels	Alzheimer's disease	rs4523130	G	A	G	A	-0.188253	0.0424813	9.36148e-06	0.0009	0.022	0.9685	FALSE	TRUE
Glycerate levels	Alzheimer's disease	rs55836930	G	T	G	T	0.230304	0.0491907	2.84279e-06	-0.0092	0.0256	0.7188	FALSE	TRUE
Glycerate levels	Alzheimer's disease	rs62381616	T	C	T	C	-0.275712	0.044263	4.69543e-10	0.0077	0.024	0.7486	FALSE	TRUE
Glycerate levels	Alzheimer's disease	rs6554022	A	C	A	C	-0.116404	0.0250231	3.28947e-06	-0.003	0.0131	0.817	FALSE	TRUE
Glycerate levels	Alzheimer's disease	rs756874	G	A	G	A	0.074803	0.0159593	2.77104e-06	-0.0142	0.0085	0.096781	FALSE	TRUE
Glycerate levels	Alzheimer's disease	rs77814441	T	C	T	C	-0.20709	0.0457112	5.88729e-06	0.0268	0.0249	0.2824	FALSE	TRUE
Glycerate levels	Alzheimer's disease	rs9808439	T	C	T	C	-0.197404	0.0438208	6.64367e-06	0.0157	0.023	0.495	FALSE	TRUE
3-methoxycatechol sulfate (2) levels	Alzheimer's disease	rs10003807	C	T	C	T	-0.214142	0.0423463	4.2609e-07	-0.0299	0.0206	0.1477	FALSE	TRUE
3-methoxycatechol sulfate (2) levels	Alzheimer's disease	rs116896552	T	C	T	C	0.182836	0.0387157	2.32944e-06	-0.0463	0.0197	0.0186299	FALSE	TRUE
3-methoxycatechol sulfate (2) levels	Alzheimer's disease	rs11724679	G	A	G	A	-0.152964	0.0318999	1.62568e-06	0.0037	0.0159	0.8178	FALSE	TRUE
3-methoxycatechol sulfate (2) levels	Alzheimer's disease	rs117959567	T	G	T	G	0.466179	0.100818	3.76447e-06	-0.0177	0.0482	0.712901	FALSE	TRUE
3-methoxycatechol sulfate (2) levels	Alzheimer's disease	rs118101266	T	G	T	G	0.411941	0.0914875	6.7094e-06	0.0094	0.0459	0.8375	FALSE	TRUE
3-methoxycatechol sulfate (2) levels	Alzheimer's disease	rs141596626	A	G	A	G	0.500991	0.100791	6.67559e-07	0.0556	0.0439	0.2056	FALSE	TRUE
3-methoxycatechol sulfate (2) levels	Alzheimer's disease	rs142232430	A	G	A	G	0.397639	0.0789083	4.67333e-07	0.001	0.0415	0.9814	FALSE	TRUE
3-methoxycatechol sulfate (2) levels	Alzheimer's disease	rs144886872	G	A	G	A	0.418993	0.0763485	4.06754e-08	-0.0411	0.0407	0.3128	FALSE	TRUE
3-methoxycatechol sulfate (2) levels	Alzheimer's disease	rs2027378	G	T	G	T	0.0986684	0.022123	8.19651e-06	-0.009	0.0112	0.4194	FALSE	TRUE
3-methoxycatechol sulfate (2) levels	Alzheimer's disease	rs2112460	A	G	A	G	0.0767993	0.0162018	2.13543e-06	-0.0023	0.0087	0.7945	FALSE	TRUE
3-methoxycatechol sulfate (2) levels	Alzheimer's disease	rs4611006	C	T	C	T	0.0782356	0.0175621	8.39715e-06	0.0122	0.0088	0.1648	FALSE	TRUE
3-methoxycatechol sulfate (2) levels	Alzheimer's disease	rs56681315	T	C	T	C	0.120369	0.0264445	5.32027e-06	0.0068	0.0127	0.595	FALSE	TRUE
3-methoxycatechol sulfate (2) levels	Alzheimer's disease	rs62273053	A	G	A	G	0.335042	0.0728876	4.29242e-06	-0.0163	0.0389	0.674899	FALSE	TRUE
3-methoxycatechol sulfate (2) levels	Alzheimer's disease	rs62428058	A	G	A	G	0.134476	0.0291841	4.06839e-06	-0.0031	0.0145	0.8325	FALSE	TRUE
3-methoxycatechol sulfate (2) levels	Alzheimer's disease	rs73006493	C	T	C	T	-0.149264	0.0336821	9.35548e-06	0.0313	0.017	0.0655994	FALSE	TRUE
3-methoxycatechol sulfate (2) levels	Alzheimer's disease	rs7665238	A	G	A	G	0.0854025	0.0187425	5.19845e-06	0.0026	0.0093	0.781101	FALSE	TRUE
3-methoxycatechol sulfate (2) levels	Alzheimer's disease	rs7935436	C	T	C	T	0.0796945	0.0172088	3.63849e-06	-0.0037	0.0086	0.667899	FALSE	TRUE
X-24241 levels	Alzheimer's disease	rs10004304	T	C	T	C	0.0952775	0.0202523	2.54455e-06	0.02	0.0105	0.0566696	FALSE	TRUE
X-24241 levels	Alzheimer's disease	rs1050152	T	C	T	C	-0.107399	0.0156755	7.31396e-12	-0.019	0.0082	0.0204	FALSE	TRUE
X-24241 levels	Alzheimer's disease	rs10929472	A	G	A	G	0.081388	0.0179791	5.98794e-06	-0.0155	0.0093	0.0974092	FALSE	TRUE
X-24241 levels	Alzheimer's disease	rs112552538	T	C	T	C	-0.414126	0.0873488	2.12598e-06	-0.0106	0.041	0.7967	FALSE	TRUE
X-24241 levels	Alzheimer's disease	rs115566627	C	T	C	T	-0.285575	0.0626037	5.07556e-06	-0.0126	0.0341	0.7117	FALSE	TRUE
X-24241 levels	Alzheimer's disease	rs1171614	C	T	C	T	0.163222	0.0188775	5.31586e-18	-0.0073	0.0096	0.4429	FALSE	TRUE
X-24241 levels	Alzheimer's disease	rs12208357	T	C	T	C	-0.190394	0.0303378	3.47857e-10	-0.0369	0.016	0.0213599	FALSE	TRUE
X-24241 levels	Alzheimer's disease	rs12427077	G	A	G	A	-0.0971084	0.0210017	3.76719e-06	0.0021	0.011	0.8516	FALSE	TRUE
X-24241 levels	Alzheimer's disease	rs12903952	T	C	T	C	0.0961508	0.0201602	1.84834e-06	0.0076	0.0103	0.4631	FALSE	TRUE
X-24241 levels	Alzheimer's disease	rs139160	C	T	C	T	0.0776784	0.0174627	8.65777e-06	-0.0097	0.0091	0.2816	FALSE	TRUE
X-24241 levels	Alzheimer's disease	rs148908721	G	A	G	A	-0.252437	0.0559488	6.42413e-06	0.022	0.026	0.3968	FALSE	TRUE
X-24241 levels	Alzheimer's disease	rs151285077	A	G	A	G	0.131983	0.029454	7.43049e-06	0.0163	0.0151	0.2807	FALSE	TRUE
X-24241 levels	Alzheimer's disease	rs181481755	T	C	T	C	-0.357481	0.0798063	7.48703e-06	-0.0106	0.0421	0.8021	FALSE	TRUE
X-24241 levels	Alzheimer's disease	rs187428247	A	G	A	G	-0.350229	0.0743746	2.48959e-06	0.0107	0.0358	0.7642	FALSE	TRUE
X-24241 levels	Alzheimer's disease	rs34059508	A	G	A	G	-0.33036	0.0489551	1.49658e-11	0.038	0.0272	0.1628	FALSE	TRUE
X-24241 levels	Alzheimer's disease	rs424029	A	G	A	G	-0.178391	0.0379512	2.59491e-06	-0.0084	0.0203	0.6785	FALSE	TRUE
X-24241 levels	Alzheimer's disease	rs60177389	C	A	C	A	0.146051	0.0319185	4.74494e-06	0.0402	0.0167	0.0161298	FALSE	TRUE
X-24241 levels	Alzheimer's disease	rs7234351	A	C	A	C	0.0721651	0.0159329	5.91753e-06	0.0007	0.0082	0.9321	FALSE	TRUE
X-24241 levels	Alzheimer's disease	rs75747525	A	G	A	G	0.0905312	0.0203929	9.02317e-06	0.01	0.0106	0.344	FALSE	TRUE
X-24241 levels	Alzheimer's disease	rs77010315	A	C	A	C	-0.391863	0.0711089	3.57303e-08	-0.0834	0.0383	0.0295597	FALSE	TRUE
Tartarate levels	Alzheimer's disease	rs10004542	G	A	G	A	0.0814848	0.0176888	4.09376e-06	-0.0079	0.0086	0.3568	FALSE	TRUE
Tartarate levels	Alzheimer's disease	rs10247649	G	A	G	A	-0.0826258	0.0178465	3.65988e-06	-0.0056	0.0084	0.5083	FALSE	TRUE
Tartarate levels	Alzheimer's disease	rs10945808	T	C	T	C	-0.130904	0.0285309	4.47212e-06	-0.0029	0.014	0.8367	FALSE	TRUE
Tartarate levels	Alzheimer's disease	rs115272033	C	T	C	T	-0.170179	0.0381431	8.13534e-06	0.0309	0.0193	0.1091	FALSE	TRUE
Tartarate levels	Alzheimer's disease	rs116626434	A	G	A	G	-0.149526	0.0320676	3.11891e-06	0.0264	0.0163	0.1044	FALSE	TRUE
Tartarate levels	Alzheimer's disease	rs117483011	A	G	A	G	-0.157832	0.0354548	8.52127e-06	-0.0285	0.0177	0.1082	FALSE	TRUE
Tartarate levels	Alzheimer's disease	rs13089230	A	G	A	G	0.0825424	0.0175787	2.65821e-06	0.0002	0.0085	0.9768	FALSE	TRUE
Tartarate levels	Alzheimer's disease	rs138430505	C	T	C	T	0.285026	0.0624394	4.9989e-06	-0.0466	0.0337	0.1659	FALSE	TRUE
Tartarate levels	Alzheimer's disease	rs141660852	T	C	T	C	0.228649	0.0493121	3.53868e-06	-0.0194	0.0255	0.4468	FALSE	TRUE
Tartarate levels	Alzheimer's disease	rs142959592	T	C	T	C	-0.373738	0.0817952	4.89608e-06	0.0722	0.0414	0.0812101	FALSE	TRUE
Tartarate levels	Alzheimer's disease	rs146593632	T	C	T	C	0.370018	0.0815327	5.67156e-06	0.0246	0.0416	0.5546	FALSE	TRUE
Tartarate levels	Alzheimer's disease	rs17026163	T	C	T	C	-0.223964	0.0470413	1.92634e-06	0.0285	0.0223	0.2006	FALSE	TRUE
Tartarate levels	Alzheimer's disease	rs298392	T	C	T	C	0.087711	0.0186612	2.59941e-06	0.0019	0.0089	0.8331	FALSE	TRUE
Tartarate levels	Alzheimer's disease	rs628038	C	T	C	T	-0.0783007	0.0170337	4.2902e-06	-0.0029	0.0083	0.7268	FALSE	TRUE
Tartarate levels	Alzheimer's disease	rs75583177	G	A	G	A	-0.145169	0.032432	7.60113e-06	0.0042	0.0153	0.780601	FALSE	TRUE
Tartarate levels	Alzheimer's disease	rs76501568	T	C	T	C	-0.267429	0.0587195	5.2548e-06	-0.0431	0.029	0.1381	FALSE	TRUE
Tartarate levels	Alzheimer's disease	rs77798428	A	G	A	G	-0.318661	0.0614021	2.10597e-07	0.0083	0.0308	0.7877	FALSE	TRUE
Tartarate levels	Alzheimer's disease	rs79983252	A	C	A	C	0.236427	0.0486249	1.16058e-06	0.0375	0.0246	0.1276	FALSE	TRUE
Tartarate levels	Alzheimer's disease	rs9948951	A	G	A	G	-0.0971868	0.0214343	5.78302e-06	-0.0067	0.0107	0.5317	FALSE	TRUE
3-methyl-2-oxovalerate to 3-methyl-2-oxobutyrate ratio	Alzheimer's disease	rs1000533	C	T	C	T	-0.0744348	0.016144	4.01341e-06	-0.0107	0.0085	0.2096	FALSE	TRUE
3-methyl-2-oxovalerate to 3-methyl-2-oxobutyrate ratio	Alzheimer's disease	rs111948662	A	G	A	G	-0.229599	0.0481402	1.84786e-06	-0.0017	0.0272	0.9512	FALSE	TRUE
3-methyl-2-oxovalerate to 3-methyl-2-oxobutyrate ratio	Alzheimer's disease	rs11612260	G	A	G	A	0.231322	0.0502245	4.10972e-06	0.0354	0.0262	0.1764	FALSE	TRUE
3-methyl-2-oxovalerate to 3-methyl-2-oxobutyrate ratio	Alzheimer's disease	rs12584035	G	A	G	A	0.101695	0.0223658	5.44436e-06	-0.0025	0.0123	0.8409	FALSE	TRUE
3-methyl-2-oxovalerate to 3-methyl-2-oxobutyrate ratio	Alzheimer's disease	rs12676561	C	T	C	T	-0.0736734	0.0164069	7.1094e-06	-0.0006	0.0087	0.9487	FALSE	TRUE
3-methyl-2-oxovalerate to 3-methyl-2-oxobutyrate ratio	Alzheimer's disease	rs140189036	C	T	C	T	0.20402	0.0457611	8.25831e-06	-0.0013	0.0256	0.9606	FALSE	TRUE
3-methyl-2-oxovalerate to 3-methyl-2-oxobutyrate ratio	Alzheimer's disease	rs140605392	A	G	A	G	-0.403794	0.0905641	8.24762e-06	0.0338	0.0445	0.447	FALSE	TRUE
3-methyl-2-oxovalerate to 3-methyl-2-oxobutyrate ratio	Alzheimer's disease	rs140845471	G	A	G	A	-0.243385	0.0530137	4.4115e-06	0.0529	0.0275	0.0549604	FALSE	TRUE
3-methyl-2-oxovalerate to 3-methyl-2-oxobutyrate ratio	Alzheimer's disease	rs150882021	A	G	A	G	0.161945	0.0358207	6.1554e-06	-0.0083	0.02	0.6758	FALSE	TRUE
3-methyl-2-oxovalerate to 3-methyl-2-oxobutyrate ratio	Alzheimer's disease	rs17697795	A	G	A	G	-0.0740641	0.0164114	6.39252e-06	0.0093	0.0087	0.2868	FALSE	TRUE
3-methyl-2-oxovalerate to 3-methyl-2-oxobutyrate ratio	Alzheimer's disease	rs2164029	G	A	G	A	-0.0763181	0.0160576	2.0066e-06	0.0006	0.0086	0.9406	FALSE	TRUE
3-methyl-2-oxovalerate to 3-methyl-2-oxobutyrate ratio	Alzheimer's disease	rs4847350	C	T	C	T	-0.0726322	0.0160796	6.27065e-06	-0.0042	0.0087	0.632	FALSE	TRUE
3-methyl-2-oxovalerate to 3-methyl-2-oxobutyrate ratio	Alzheimer's disease	rs55714514	C	T	C	T	-0.0859672	0.0193239	8.63728e-06	-0.0029	0.0102	0.774801	FALSE	TRUE
3-methyl-2-oxovalerate to 3-methyl-2-oxobutyrate ratio	Alzheimer's disease	rs56299996	C	T	C	T	0.114589	0.0247027	3.50579e-06	-0.0197	0.0132	0.1364	FALSE	TRUE
3-methyl-2-oxovalerate to 3-methyl-2-oxobutyrate ratio	Alzheimer's disease	rs59647005	T	C	T	C	0.36289	0.0790673	4.44033e-06	0.0607	0.0411	0.1396	FALSE	TRUE
3-methyl-2-oxovalerate to 3-methyl-2-oxobutyrate ratio	Alzheimer's disease	rs72695489	C	T	C	T	0.0995737	0.0210433	2.22497e-06	0.0005	0.0118	0.9635	FALSE	TRUE
3-methyl-2-oxovalerate to 3-methyl-2-oxobutyrate ratio	Alzheimer's disease	rs75003689	T	C	T	C	0.156162	0.0343456	5.44741e-06	0.0367	0.0184	0.0462701	FALSE	TRUE
3-methyl-2-oxovalerate to 3-methyl-2-oxobutyrate ratio	Alzheimer's disease	rs76665747	A	G	A	G	-0.166812	0.0359952	3.58181e-06	-0.0055	0.0198	0.782899	FALSE	TRUE
3-methyl-2-oxovalerate to 3-methyl-2-oxobutyrate ratio	Alzheimer's disease	rs78177403	C	A	C	A	0.321817	0.0549034	4.58653e-09	-0.0037	0.0315	0.9077	FALSE	TRUE
3-methyl-2-oxovalerate to 3-methyl-2-oxobutyrate ratio	Alzheimer's disease	rs79434713	A	C	A	C	-0.151492	0.0340111	8.42111e-06	0.0136	0.0199	0.495801	FALSE	TRUE
X-21471 levels	Alzheimer's disease	rs10005620	A	C	A	C	0.0863954	0.019471	9.11692e-06	0.0113	0.0104	0.276	FALSE	TRUE
X-21471 levels	Alzheimer's disease	rs1057868	T	C	T	C	0.081922	0.0171193	1.70673e-06	-0.0042	0.009	0.637699	FALSE	TRUE
X-21471 levels	Alzheimer's disease	rs113425901	T	C	T	C	-0.319025	0.0718024	8.8671e-06	-0.0095	0.0358	0.7905	FALSE	TRUE
X-21471 levels	Alzheimer's disease	rs113812196	A	G	A	G	-0.25625	0.0555345	3.94532e-06	-0.0802	0.031	0.00969795	FALSE	TRUE
X-21471 levels	Alzheimer's disease	rs114114736	T	C	T	C	-0.221632	0.0494928	7.53248e-06	-0.014	0.0267	0.599601	FALSE	TRUE
X-21471 levels	Alzheimer's disease	rs116576599	T	C	T	C	0.151742	0.0332013	4.86864e-06	-0.0453	0.0172	0.00845201	FALSE	TRUE
X-21471 levels	Alzheimer's disease	rs117222455	C	T	C	T	-0.237521	0.0526376	6.41025e-06	-0.0307	0.0279	0.2704	FALSE	TRUE
X-21471 levels	Alzheimer's disease	rs117988718	A	G	A	G	0.233337	0.0520922	7.48857e-06	0.0075	0.028	0.7878	FALSE	TRUE
X-21471 levels	Alzheimer's disease	rs1260333	G	A	G	A	-0.0833185	0.0155065	7.73736e-08	-0.0073	0.0081	0.3711	FALSE	TRUE
X-21471 levels	Alzheimer's disease	rs146939592	G	A	G	A	0.328913	0.0666354	7.97394e-07	-0.0333	0.0345	0.3338	FALSE	TRUE
X-21471 levels	Alzheimer's disease	rs148544135	G	A	G	A	0.333838	0.0753431	9.38383e-06	-0.0261	0.0399	0.5141	FALSE	TRUE
X-21471 levels	Alzheimer's disease	rs189017081	C	T	C	T	0.464597	0.0602426	1.23774e-14	0.0185	0.0363	0.6108	FALSE	TRUE
X-21471 levels	Alzheimer's disease	rs189767754	G	A	G	A	0.352124	0.078619	7.50415e-06	-0.0269	0.0443	0.5444	FALSE	TRUE
X-21471 levels	Alzheimer's disease	rs212100	C	T	C	T	0.331612	0.0210966	1.12539e-55	0.0248	0.0119	0.0375198	FALSE	TRUE
X-21471 levels	Alzheimer's disease	rs2178720	T	C	T	C	-0.084673	0.0179583	2.4174e-06	-0.0151	0.0093	0.1056	FALSE	TRUE
X-21471 levels	Alzheimer's disease	rs34371091	T	G	T	G	0.126752	0.0286136	9.43284e-06	0.0193	0.0157	0.2177	FALSE	TRUE
X-21471 levels	Alzheimer's disease	rs3789505	T	C	T	C	0.171932	0.0375928	4.79544e-06	0.0193	0.0186	0.3013	FALSE	TRUE
X-21471 levels	Alzheimer's disease	rs59683852	A	G	A	G	-0.610797	0.113088	6.62472e-08	-0.0858	0.0623	0.1683	FALSE	TRUE
X-21471 levels	Alzheimer's disease	rs61780033	A	G	A	G	-0.248312	0.0556231	8.03771e-06	0.0144	0.0295	0.6268	FALSE	TRUE
X-21471 levels	Alzheimer's disease	rs6876434	C	T	C	T	0.0889546	0.0174087	3.22557e-07	-0.0128	0.0092	0.1627	FALSE	TRUE
X-21471 levels	Alzheimer's disease	rs72838129	C	T	C	T	-0.580097	0.0327696	4.0247e-70	0.025	0.0173	0.1473	FALSE	TRUE
X-21471 levels	Alzheimer's disease	rs75369470	T	C	T	C	0.230255	0.0503223	4.74838e-06	-0.0089	0.0278	0.749799	FALSE	TRUE
X-21471 levels	Alzheimer's disease	rs77100631	G	A	G	A	-0.161227	0.0337304	1.75407e-06	0.0135	0.018	0.4532	FALSE	TRUE
X-21471 levels	Alzheimer's disease	rs7713886	T	C	T	C	-0.0945293	0.0200122	2.31723e-06	0.0012	0.0104	0.9096	FALSE	TRUE
X-21471 levels	Alzheimer's disease	rs841217	C	T	C	T	-0.0767432	0.0157658	1.12908e-06	0.0161	0.0082	0.0490603	FALSE	TRUE
Hydroxypalmitoyl sphingomyelin (d18:1/16:0(OH)) levels	Alzheimer's disease	rs10005957	T	C	T	C	-0.184216	0.0378129	1.10597e-06	-0.0287	0.0195	0.1408	FALSE	TRUE
Hydroxypalmitoyl sphingomyelin (d18:1/16:0(OH)) levels	Alzheimer's disease	rs113583332	A	G	A	G	0.193077	0.0408548	2.29073e-06	-0.0125	0.0223	0.5755	FALSE	TRUE
Hydroxypalmitoyl sphingomyelin (d18:1/16:0(OH)) levels	Alzheimer's disease	rs114372900	T	G	T	G	-0.321109	0.0639159	5.06252e-07	0.0107	0.0364	0.7683	FALSE	TRUE
Hydroxypalmitoyl sphingomyelin (d18:1/16:0(OH)) levels	Alzheimer's disease	rs12338432	C	T	C	T	-0.276198	0.0625174	9.96423e-06	-0.0076	0.0335	0.8204	FALSE	TRUE
Hydroxypalmitoyl sphingomyelin (d18:1/16:0(OH)) levels	Alzheimer's disease	rs1260326	C	T	C	T	0.0849292	0.0153285	3.01404e-08	-0.0183	0.0082	0.0258	FALSE	TRUE
Hydroxypalmitoyl sphingomyelin (d18:1/16:0(OH)) levels	Alzheimer's disease	rs138106374	A	G	A	G	0.220026	0.0468771	2.68346e-06	0.0066	0.0273	0.8077	FALSE	TRUE
Hydroxypalmitoyl sphingomyelin (d18:1/16:0(OH)) levels	Alzheimer's disease	rs1461729	G	A	G	A	0.110054	0.0248065	9.143e-06	0.0099	0.0138	0.4753	FALSE	TRUE
Hydroxypalmitoyl sphingomyelin (d18:1/16:0(OH)) levels	Alzheimer's disease	rs17159433	G	A	G	A	0.259131	0.0574328	6.42494e-06	0.0431	0.0303	0.154	FALSE	TRUE
Hydroxypalmitoyl sphingomyelin (d18:1/16:0(OH)) levels	Alzheimer's disease	rs174568	T	C	T	C	0.281473	0.0156069	1.03188e-72	-0.0078	0.0086	0.3679	FALSE	TRUE
Hydroxypalmitoyl sphingomyelin (d18:1/16:0(OH)) levels	Alzheimer's disease	rs2117347	C	T	C	T	0.0697622	0.0150425	3.5234e-06	0.0339	0.0082	3.86803e-05	FALSE	TRUE
Hydroxypalmitoyl sphingomyelin (d18:1/16:0(OH)) levels	Alzheimer's disease	rs2240466	A	G	A	G	0.11771	0.0230896	3.43328e-07	0.0041	0.0127	0.749701	FALSE	TRUE
Hydroxypalmitoyl sphingomyelin (d18:1/16:0(OH)) levels	Alzheimer's disease	rs2315065	A	C	A	C	0.129803	0.0268117	1.28997e-06	-0.0375	0.0147	0.0104299	FALSE	TRUE
Hydroxypalmitoyl sphingomyelin (d18:1/16:0(OH)) levels	Alzheimer's disease	rs28795074	A	G	A	G	-0.167131	0.0298664	2.19404e-08	-0.2026	0.0166	1.93108e-34	FALSE	TRUE
Hydroxypalmitoyl sphingomyelin (d18:1/16:0(OH)) levels	Alzheimer's disease	rs3736228	T	C	T	C	-0.111867	0.0213966	1.71121e-07	-0.0199	0.0114	0.0806808	FALSE	TRUE
Hydroxypalmitoyl sphingomyelin (d18:1/16:0(OH)) levels	Alzheimer's disease	rs3756963	C	T	C	T	-0.0846737	0.017413	1.1582e-06	-0.0123	0.0095	0.1953	FALSE	TRUE
Hydroxypalmitoyl sphingomyelin (d18:1/16:0(OH)) levels	Alzheimer's disease	rs375938	A	G	A	G	0.0686571	0.0153336	7.55037e-06	0.0089	0.0083	0.279	FALSE	TRUE
Hydroxypalmitoyl sphingomyelin (d18:1/16:0(OH)) levels	Alzheimer's disease	rs4742750	A	G	A	G	0.111966	0.0214244	1.73139e-07	-0.0069	0.0115	0.5506	FALSE	TRUE
Hydroxypalmitoyl sphingomyelin (d18:1/16:0(OH)) levels	Alzheimer's disease	rs482282	A	G	A	G	0.0680071	0.0151632	7.29085e-06	0.0184	0.0081	0.0240702	FALSE	TRUE
Hydroxypalmitoyl sphingomyelin (d18:1/16:0(OH)) levels	Alzheimer's disease	rs55698751	G	A	G	A	0.340571	0.0755595	6.56501e-06	0.0646	0.0368	0.0786901	FALSE	TRUE
Hydroxypalmitoyl sphingomyelin (d18:1/16:0(OH)) levels	Alzheimer's disease	rs56052006	A	G	A	G	0.26461	0.0588982	7.03374e-06	-0.0331	0.0328	0.3132	FALSE	TRUE
Hydroxypalmitoyl sphingomyelin (d18:1/16:0(OH)) levels	Alzheimer's disease	rs59771628	C	A	C	A	0.0717336	0.0150877	1.99012e-06	0.0012	0.0082	0.8792	FALSE	TRUE
Hydroxypalmitoyl sphingomyelin (d18:1/16:0(OH)) levels	Alzheimer's disease	rs6471322	A	G	A	G	-0.0810044	0.015584	2.01536e-07	-0.0089	0.0087	0.303	FALSE	TRUE
Hydroxypalmitoyl sphingomyelin (d18:1/16:0(OH)) levels	Alzheimer's disease	rs6937870	T	C	T	C	0.0783475	0.0169493	3.79224e-06	-0.0175	0.0093	0.0597806	FALSE	TRUE
Hydroxypalmitoyl sphingomyelin (d18:1/16:0(OH)) levels	Alzheimer's disease	rs72940873	G	T	G	T	0.137825	0.02942	2.8033e-06	0.0129	0.0166	0.4383	FALSE	TRUE
Hydroxypalmitoyl sphingomyelin (d18:1/16:0(OH)) levels	Alzheimer's disease	rs74473137	A	G	A	G	-0.249778	0.0536481	3.22636e-06	-0.0074	0.0305	0.8084	FALSE	TRUE
Hydroxypalmitoyl sphingomyelin (d18:1/16:0(OH)) levels	Alzheimer's disease	rs79209503	T	C	T	C	-0.221151	0.0485036	5.12829e-06	0.0118	0.0283	0.6782	FALSE	TRUE
Hydroxypalmitoyl sphingomyelin (d18:1/16:0(OH)) levels	Alzheimer's disease	rs80321804	G	A	G	A	-0.177044	0.0393603	6.85855e-06	-0.0032	0.0215	0.8826	FALSE	TRUE
1-linoleoylglycerol (18:2) levels	Alzheimer's disease	rs10006032	G	A	G	A	-0.15194	0.0334117	5.42817e-06	0.0065	0.0183	0.722	FALSE	TRUE
1-linoleoylglycerol (18:2) levels	Alzheimer's disease	rs10072491	T	C	T	C	-0.17568	0.038446	4.88843e-06	-0.0245	0.0206	0.2344	FALSE	TRUE
1-linoleoylglycerol (18:2) levels	Alzheimer's disease	rs11033752	T	C	T	C	-0.0907355	0.0204967	9.56226e-06	0.0078	0.0103	0.4487	FALSE	TRUE
1-linoleoylglycerol (18:2) levels	Alzheimer's disease	rs114473062	T	C	T	C	0.226158	0.049117	4.135e-06	0.07	0.0267	0.008681	FALSE	TRUE
1-linoleoylglycerol (18:2) levels	Alzheimer's disease	rs117168942	C	T	C	T	0.191261	0.0431454	9.29617e-06	-0.0459	0.0236	0.0515798	FALSE	TRUE
1-linoleoylglycerol (18:2) levels	Alzheimer's disease	rs12447287	C	T	C	T	0.081903	0.0180828	5.91739e-06	-0.0061	0.0092	0.5042	FALSE	TRUE
1-linoleoylglycerol (18:2) levels	Alzheimer's disease	rs12858688	T	C	T	C	-0.22125	0.0491192	6.65784e-06	0.0293	0.0262	0.2641	FALSE	TRUE
1-linoleoylglycerol (18:2) levels	Alzheimer's disease	rs17410962	A	G	A	G	-0.11411	0.0235805	1.30378e-06	0.0173	0.012	0.1497	FALSE	TRUE
1-linoleoylglycerol (18:2) levels	Alzheimer's disease	rs2943179	T	C	T	C	-0.0822174	0.0185161	8.98228e-06	0.007	0.0097	0.4724	FALSE	TRUE
1-linoleoylglycerol (18:2) levels	Alzheimer's disease	rs56354314	A	G	A	G	0.235446	0.0519464	5.82959e-06	-0.0357	0.0292	0.2206	FALSE	TRUE
1-linoleoylglycerol (18:2) levels	Alzheimer's disease	rs62385039	G	A	G	A	-0.258001	0.0552286	2.98985e-06	-0.0397	0.0302	0.1889	FALSE	TRUE
1-linoleoylglycerol (18:2) levels	Alzheimer's disease	rs75445316	T	C	T	C	0.241198	0.049473	1.0862e-06	0.0039	0.0281	0.8891	FALSE	TRUE
1-linoleoylglycerol (18:2) levels	Alzheimer's disease	rs77982886	G	A	G	A	0.316857	0.0635267	6.10775e-07	-0.0146	0.0333	0.6608	FALSE	TRUE
1-linoleoylglycerol (18:2) levels	Alzheimer's disease	rs9894638	C	T	C	T	0.0857298	0.0192292	8.2607e-06	0.0145	0.0099	0.146	FALSE	TRUE
X-12680 levels	Alzheimer's disease	rs10006132	A	G	A	G	0.106176	0.0198888	9.37219e-08	0.0215	0.0105	0.0403701	FALSE	TRUE
X-12680 levels	Alzheimer's disease	rs113949763	A	G	A	G	-0.0880563	0.019815	8.83339e-06	0.0056	0.0106	0.595899	FALSE	TRUE
X-12680 levels	Alzheimer's disease	rs11790084	T	C	T	C	-0.116759	0.0239886	1.13151e-06	0.0054	0.0128	0.6718	FALSE	TRUE
X-12680 levels	Alzheimer's disease	rs1232965	G	A	G	A	0.125759	0.0257188	1.00949e-06	0.0189	0.0136	0.1645	FALSE	TRUE
X-12680 levels	Alzheimer's disease	rs12438406	C	T	C	T	0.0880515	0.0198886	9.54517e-06	0.0227	0.0105	0.0299599	FALSE	TRUE
X-12680 levels	Alzheimer's disease	rs201928	T	C	T	C	0.0707048	0.0156961	6.64943e-06	-0.0063	0.0083	0.4512	FALSE	TRUE
X-12680 levels	Alzheimer's disease	rs468720	A	G	A	G	0.0807866	0.0169477	1.87164e-06	-0.0076	0.009	0.4006	FALSE	TRUE
X-12680 levels	Alzheimer's disease	rs62	C	T	C	T	-0.0719258	0.0161188	8.11101e-06	-0.0156	0.0082	0.0587503	FALSE	TRUE
X-12680 levels	Alzheimer's disease	rs62278649	A	G	A	G	-0.0812349	0.0161594	4.97939e-07	-0.0066	0.0085	0.4377	FALSE	TRUE
X-12680 levels	Alzheimer's disease	rs6888519	C	T	C	T	-0.181717	0.0397152	4.75097e-06	0.0416	0.0207	0.0449304	FALSE	TRUE
X-12680 levels	Alzheimer's disease	rs73164485	T	C	T	C	0.200171	0.0381791	1.58034e-07	0.0003	0.02	0.9885	FALSE	TRUE
X-12680 levels	Alzheimer's disease	rs74459194	A	C	A	C	-0.259661	0.0584193	8.79856e-06	-0.0328	0.03	0.2738	FALSE	TRUE
X-12680 levels	Alzheimer's disease	rs75693448	T	C	T	C	-0.118346	0.0250911	2.39758e-06	-0.002	0.0147	0.8906	FALSE	TRUE
X-12680 levels	Alzheimer's disease	rs9461633	G	A	G	A	-0.0862988	0.0195004	9.62238e-06	0.0146	0.0102	0.1552	FALSE	TRUE
Carnitine levels	Alzheimer's disease	rs10006723	T	G	T	G	0.170956	0.0345341	7.40711e-07	0.0058	0.0182	0.750699	FALSE	TRUE
Carnitine levels	Alzheimer's disease	rs10900223	C	T	C	T	-0.105448	0.0176162	2.15271e-09	0.005	0.0093	0.5938	FALSE	TRUE
Carnitine levels	Alzheimer's disease	rs112819917	A	G	A	G	-0.438422	0.0855532	2.98241e-07	-0.005	0.0393	0.8996	FALSE	TRUE
Carnitine levels	Alzheimer's disease	rs115168226	G	A	G	A	-0.446554	0.097039	4.18852e-06	-0.0133	0.0449	0.767499	FALSE	TRUE
Carnitine levels	Alzheimer's disease	rs1171617	T	G	T	G	0.443332	0.0179927	4.75726e-134	-0.0072	0.0095	0.4488	FALSE	TRUE
Carnitine levels	Alzheimer's disease	rs11871125	T	C	T	C	0.072665	0.0157893	4.1814e-06	0.0093	0.0084	0.2713	FALSE	TRUE
Carnitine levels	Alzheimer's disease	rs13026148	A	G	A	G	-0.0706059	0.0158653	8.57356e-06	-0.0026	0.0085	0.763001	FALSE	TRUE
Carnitine levels	Alzheimer's disease	rs13247874	T	C	T	C	-0.103668	0.0195859	1.20324e-07	-0.0026	0.0105	0.8045	FALSE	TRUE
Carnitine levels	Alzheimer's disease	rs149235996	G	A	G	A	-0.56909	0.0700396	4.46387e-16	-0.0776	0.0386	0.0443905	FALSE	TRUE
Carnitine levels	Alzheimer's disease	rs1511808	T	C	T	C	-0.0697692	0.0157378	9.28299e-06	0.0157	0.0084	0.0617803	FALSE	TRUE
Carnitine levels	Alzheimer's disease	rs1765260	A	G	A	G	-0.0999797	0.0211507	2.27832e-06	0.0056	0.0113	0.6236	FALSE	TRUE
Carnitine levels	Alzheimer's disease	rs2512510	A	G	A	G	-0.0870239	0.0186419	3.03877e-06	-0.002	0.01	0.8382	FALSE	TRUE
Carnitine levels	Alzheimer's disease	rs2625939	T	C	T	C	0.0859678	0.0183528	2.81073e-06	0.0171	0.0097	0.0797499	FALSE	TRUE
Carnitine levels	Alzheimer's disease	rs55775057	A	G	A	G	-0.0960378	0.0215564	8.38207e-06	0.0073	0.0115	0.528799	FALSE	TRUE
Carnitine levels	Alzheimer's disease	rs72836546	T	C	T	C	-0.0906795	0.0180707	5.22043e-07	-0.0051	0.0095	0.5923	FALSE	TRUE
Carnitine levels	Alzheimer's disease	rs73006619	C	A	C	A	-0.168203	0.0368665	5.05538e-06	-0.0071	0.0206	0.729201	FALSE	TRUE
Carnitine levels	Alzheimer's disease	rs73025372	G	A	G	A	0.157569	0.0346167	5.31831e-06	-0.0444	0.0184	0.0156401	FALSE	TRUE
Carnitine levels	Alzheimer's disease	rs7537155	A	G	A	G	-0.0900652	0.019229	2.81588e-06	-0.0118	0.0105	0.2634	FALSE	TRUE
Carnitine levels	Alzheimer's disease	rs76187828	G	A	G	A	-0.117619	0.0264472	8.69448e-06	-0.0019	0.0136	0.8895	FALSE	TRUE
Carnitine levels	Alzheimer's disease	rs76638161	T	C	T	C	0.192728	0.0434891	9.35172e-06	-0.0433	0.0238	0.0685993	FALSE	TRUE
Carnitine levels	Alzheimer's disease	rs7705826	G	T	G	T	0.199276	0.0204928	2.37787e-22	-0.0197	0.0109	0.0689398	FALSE	TRUE
Carnitine levels	Alzheimer's disease	rs78428648	A	G	A	G	0.179162	0.0400467	7.68304e-06	0.0114	0.0211	0.587801	FALSE	TRUE
Carnitine levels	Alzheimer's disease	rs78562549	T	G	T	G	0.394897	0.0881915	7.54445e-06	-0.0011	0.0447	0.9805	FALSE	TRUE
Carnitine levels	Alzheimer's disease	rs79717472	G	A	G	A	-0.218081	0.0461728	2.32235e-06	-0.0157	0.0262	0.5495	FALSE	TRUE
Isoleucine to phosphate ratio	Alzheimer's disease	rs10006729	G	A	G	A	-0.069881	0.0146229	1.76268e-06	0.0077	0.0082	0.3457	FALSE	TRUE
Isoleucine to phosphate ratio	Alzheimer's disease	rs10227729	C	T	C	T	0.097048	0.0197725	9.18965e-07	0.031	0.0109	0.00451201	FALSE	TRUE
Isoleucine to phosphate ratio	Alzheimer's disease	rs11066875	T	C	T	C	0.152119	0.0290453	1.62954e-07	-0.0189	0.017	0.2669	FALSE	TRUE
Isoleucine to phosphate ratio	Alzheimer's disease	rs113979038	A	G	A	G	-0.203458	0.0384395	1.20367e-07	-0.009	0.0211	0.670199	FALSE	TRUE
Isoleucine to phosphate ratio	Alzheimer's disease	rs114600258	A	G	A	G	0.279245	0.0589082	2.13364e-06	0.0413	0.032	0.1979	FALSE	TRUE
Isoleucine to phosphate ratio	Alzheimer's disease	rs11626897	A	G	A	G	0.157981	0.0328327	1.49652e-06	-0.0122	0.0181	0.5014	FALSE	TRUE
Isoleucine to phosphate ratio	Alzheimer's disease	rs11661293	T	C	T	C	0.0931655	0.0202932	4.41195e-06	0.0214	0.0114	0.0599998	FALSE	TRUE
Isoleucine to phosphate ratio	Alzheimer's disease	rs12918636	C	A	C	A	0.106738	0.0227824	2.79787e-06	-0.0116	0.0118	0.322	FALSE	TRUE
Isoleucine to phosphate ratio	Alzheimer's disease	rs17558155	A	C	A	C	0.117099	0.0248651	2.48485e-06	0.0102	0.0139	0.4637	FALSE	TRUE
Isoleucine to phosphate ratio	Alzheimer's disease	rs193109653	A	G	A	G	-0.311939	0.0680002	4.48974e-06	0.0297	0.0344	0.3881	FALSE	TRUE
Isoleucine to phosphate ratio	Alzheimer's disease	rs193152187	T	G	T	G	0.331727	0.0750983	9.99728e-06	-0.0139	0.0432	0.7486	FALSE	TRUE
Isoleucine to phosphate ratio	Alzheimer's disease	rs2591078	C	T	C	T	-0.0720375	0.0145929	7.95487e-07	-0.0067	0.0083	0.4186	FALSE	TRUE
Isoleucine to phosphate ratio	Alzheimer's disease	rs62093367	A	G	A	G	0.0957318	0.0215811	9.16852e-06	0.0109	0.0122	0.3726	FALSE	TRUE
Isoleucine to phosphate ratio	Alzheimer's disease	rs6942431	G	A	G	A	-0.0681398	0.0153805	9.41207e-06	-0.0084	0.0085	0.3232	FALSE	TRUE
Isoleucine to phosphate ratio	Alzheimer's disease	rs7324755	C	T	C	T	-0.117451	0.0265195	9.47417e-06	0.001	0.0152	0.945	FALSE	TRUE
Isoleucine to phosphate ratio	Alzheimer's disease	rs73271806	T	C	T	C	-0.113331	0.0232157	1.0519e-06	0.0286	0.013	0.0279801	FALSE	TRUE
Isoleucine to phosphate ratio	Alzheimer's disease	rs75847252	C	T	C	T	0.253807	0.0541714	2.79605e-06	-0.039	0.0304	0.1992	FALSE	TRUE
Isoleucine to phosphate ratio	Alzheimer's disease	rs77275380	T	C	T	C	0.308325	0.0690998	8.11854e-06	0.0125	0.0372	0.7377	FALSE	TRUE
Isoleucine to phosphate ratio	Alzheimer's disease	rs7779835	C	T	C	T	0.22396	0.0495221	6.11328e-06	0.0138	0.026	0.596401	FALSE	TRUE
Isoleucine to phosphate ratio	Alzheimer's disease	rs78145602	T	C	T	C	-0.17984	0.0355643	4.26464e-07	-0.0088	0.0197	0.6546	FALSE	TRUE
Isoleucine to phosphate ratio	Alzheimer's disease	rs80084508	T	G	T	G	-0.121794	0.0270413	6.66881e-06	0.0135	0.0151	0.3712	FALSE	TRUE
Isoleucine to phosphate ratio	Alzheimer's disease	rs80197269	G	A	G	A	-0.152764	0.0331395	4.03211e-06	-0.0085	0.0195	0.664401	FALSE	TRUE
Isoleucine to phosphate ratio	Alzheimer's disease	rs9643611	G	T	G	T	0.076665	0.0168616	5.4487e-06	-0.0168	0.0098	0.0865605	FALSE	TRUE
Glycosyl-N-behenoyl-sphingadienine (d18:2/22:0) levels	Alzheimer's disease	rs1000768	T	G	T	G	0.0683876	0.0154364	9.41139e-06	0.0018	0.0082	0.829	FALSE	TRUE
Glycosyl-N-behenoyl-sphingadienine (d18:2/22:0) levels	Alzheimer's disease	rs10511533	C	T	C	T	-0.179238	0.0382674	2.81562e-06	-0.0184	0.0209	0.3794	FALSE	TRUE
Glycosyl-N-behenoyl-sphingadienine (d18:2/22:0) levels	Alzheimer's disease	rs10823631	G	A	G	A	0.0986998	0.0161334	9.49297e-10	-0.0067	0.0087	0.4405	FALSE	TRUE
Glycosyl-N-behenoyl-sphingadienine (d18:2/22:0) levels	Alzheimer's disease	rs10908901	T	C	T	C	-0.46639	0.101827	4.64505e-06	0.0333	0.0424	0.4324	FALSE	TRUE
Glycosyl-N-behenoyl-sphingadienine (d18:2/22:0) levels	Alzheimer's disease	rs11647674	T	G	T	G	-0.0747483	0.0159924	2.95388e-06	0.0222	0.0085	0.00886503	FALSE	TRUE
Glycosyl-N-behenoyl-sphingadienine (d18:2/22:0) levels	Alzheimer's disease	rs11722463	A	G	A	G	0.163258	0.015626	1.49884e-25	0.0116	0.0084	0.166	FALSE	TRUE
Glycosyl-N-behenoyl-sphingadienine (d18:2/22:0) levels	Alzheimer's disease	rs117394165	T	C	T	C	0.180797	0.0398928	5.84101e-06	0.0068	0.0215	0.75	FALSE	TRUE
Glycosyl-N-behenoyl-sphingadienine (d18:2/22:0) levels	Alzheimer's disease	rs118019327	C	A	C	A	0.305951	0.0643906	2.01923e-06	-0.0136	0.0351	0.6988	FALSE	TRUE
Glycosyl-N-behenoyl-sphingadienine (d18:2/22:0) levels	Alzheimer's disease	rs12113068	T	G	T	G	0.17193	0.0344189	5.87723e-07	-0.0012	0.019	0.9486	FALSE	TRUE
Glycosyl-N-behenoyl-sphingadienine (d18:2/22:0) levels	Alzheimer's disease	rs12193198	A	G	A	G	0.0714555	0.0153453	3.21615e-06	0.008	0.0083	0.3335	FALSE	TRUE
Glycosyl-N-behenoyl-sphingadienine (d18:2/22:0) levels	Alzheimer's disease	rs139356071	A	G	A	G	-0.305825	0.065094	2.62464e-06	-0.0152	0.0336	0.6516	FALSE	TRUE
Glycosyl-N-behenoyl-sphingadienine (d18:2/22:0) levels	Alzheimer's disease	rs1784494	A	G	A	G	-0.0740639	0.0151951	1.09251e-06	0.0025	0.0082	0.762	FALSE	TRUE
Glycosyl-N-behenoyl-sphingadienine (d18:2/22:0) levels	Alzheimer's disease	rs261290	C	T	C	T	-0.0760656	0.0163746	3.3951e-06	0.0294	0.0086	0.000625605	FALSE	TRUE
Glycosyl-N-behenoyl-sphingadienine (d18:2/22:0) levels	Alzheimer's disease	rs28416749	C	T	C	T	0.0893799	0.0188068	2.00883e-06	-0.0087	0.0103	0.3999	FALSE	TRUE
Glycosyl-N-behenoyl-sphingadienine (d18:2/22:0) levels	Alzheimer's disease	rs2989751	G	A	G	A	-0.0798624	0.0176439	6.00149e-06	0.012	0.0094	0.201	FALSE	TRUE
Glycosyl-N-behenoyl-sphingadienine (d18:2/22:0) levels	Alzheimer's disease	rs35818294	A	C	A	C	0.300353	0.0198764	1.36982e-51	-0.0145	0.0106	0.1724	FALSE	TRUE
Glycosyl-N-behenoyl-sphingadienine (d18:2/22:0) levels	Alzheimer's disease	rs3750434	A	G	A	G	0.103985	0.0153983	1.44811e-11	0.0015	0.0082	0.8568	FALSE	TRUE
Glycosyl-N-behenoyl-sphingadienine (d18:2/22:0) levels	Alzheimer's disease	rs728185	G	A	G	A	-0.131589	0.0293093	7.13336e-06	-0.0198	0.0147	0.1798	FALSE	TRUE
Glycosyl-N-behenoyl-sphingadienine (d18:2/22:0) levels	Alzheimer's disease	rs7320739	G	T	G	T	-0.0952298	0.0204931	3.36922e-06	-0.012	0.0109	0.2691	FALSE	TRUE
Glycosyl-N-behenoyl-sphingadienine (d18:2/22:0) levels	Alzheimer's disease	rs7585677	G	A	G	A	0.0696798	0.0155359	7.28895e-06	0.0064	0.0082	0.4374	FALSE	TRUE
Glycosyl-N-behenoyl-sphingadienine (d18:2/22:0) levels	Alzheimer's disease	rs76357200	C	A	C	A	0.238586	0.0516857	3.9103e-06	0.0033	0.0278	0.9047	FALSE	TRUE
Glycosyl-N-behenoyl-sphingadienine (d18:2/22:0) levels	Alzheimer's disease	rs76560367	G	T	G	T	-0.260923	0.0549368	2.03917e-06	0.0275	0.0313	0.3803	FALSE	TRUE
Glycosyl-N-behenoyl-sphingadienine (d18:2/22:0) levels	Alzheimer's disease	rs7657342	T	C	T	C	0.0751754	0.0168021	7.67054e-06	0.0039	0.009	0.6631	FALSE	TRUE
Glycosyl-N-behenoyl-sphingadienine (d18:2/22:0) levels	Alzheimer's disease	rs7953249	A	G	A	G	0.0706765	0.0154152	4.54321e-06	0.0149	0.0082	0.0676099	FALSE	TRUE
Glycosyl-N-behenoyl-sphingadienine (d18:2/22:0) levels	Alzheimer's disease	rs8037196	G	A	G	A	0.0746057	0.0166957	7.87435e-06	0.0068	0.009	0.4493	FALSE	TRUE
Carboxyethyl-gaba levels	Alzheimer's disease	rs10007799	A	G	A	G	-0.159871	0.0352124	5.62026e-06	0.0199	0.018	0.2688	FALSE	TRUE
Carboxyethyl-gaba levels	Alzheimer's disease	rs10226985	C	T	C	T	0.176859	0.0363456	1.13868e-06	0.0317	0.0189	0.0937497	FALSE	TRUE
Carboxyethyl-gaba levels	Alzheimer's disease	rs112733535	T	C	T	C	0.381216	0.0837424	5.30759e-06	0.0298	0.0385	0.4386	FALSE	TRUE
Carboxyethyl-gaba levels	Alzheimer's disease	rs1165152	G	A	G	A	-0.137002	0.0153637	4.7803e-19	0.0041	0.0081	0.615	FALSE	TRUE
Carboxyethyl-gaba levels	Alzheimer's disease	rs1213850	C	T	C	T	-0.0823861	0.0159727	2.49689e-07	-0.0037	0.0085	0.6623	FALSE	TRUE
Carboxyethyl-gaba levels	Alzheimer's disease	rs13435198	G	A	G	A	-0.070316	0.0158751	9.45275e-06	0.0015	0.0084	0.8592	FALSE	TRUE
Carboxyethyl-gaba levels	Alzheimer's disease	rs13438347	A	C	A	C	0.115088	0.0251837	4.87846e-06	0.0375	0.0132	0.004476	FALSE	TRUE
Carboxyethyl-gaba levels	Alzheimer's disease	rs151029871	A	G	A	G	-0.258486	0.0541148	1.78269e-06	-0.0077	0.0291	0.7901	FALSE	TRUE
Carboxyethyl-gaba levels	Alzheimer's disease	rs17721101	C	A	C	A	-0.131607	0.02852	3.93909e-06	-0.0379	0.0158	0.01662	FALSE	TRUE
Carboxyethyl-gaba levels	Alzheimer's disease	rs2404849	G	T	G	T	-0.104966	0.0237378	9.78378e-06	0.0161	0.0123	0.1917	FALSE	TRUE
Carboxyethyl-gaba levels	Alzheimer's disease	rs3744683	C	T	C	T	0.317992	0.0717051	9.21955e-06	0.0002	0.0347	0.9948	FALSE	TRUE
Carboxyethyl-gaba levels	Alzheimer's disease	rs4725969	T	C	T	C	-0.115901	0.01647	1.96251e-12	-0.0066	0.0085	0.4432	FALSE	TRUE
Carboxyethyl-gaba levels	Alzheimer's disease	rs62492368	A	G	A	G	0.146094	0.0167314	2.50774e-18	0.0051	0.0088	0.560701	FALSE	TRUE
Carboxyethyl-gaba levels	Alzheimer's disease	rs6416742	T	C	T	C	-0.0719088	0.0159954	6.93739e-06	-0.0088	0.0085	0.3039	FALSE	TRUE
Carboxyethyl-gaba levels	Alzheimer's disease	rs73177136	G	A	G	A	-0.261052	0.056199	3.39849e-06	-0.0117	0.0292	0.6876	FALSE	TRUE
Carboxyethyl-gaba levels	Alzheimer's disease	rs75761281	G	A	G	A	-1.085	0.243212	8.15308e-06	0.1012	0.0834	0.225	FALSE	TRUE
Carboxyethyl-gaba levels	Alzheimer's disease	rs76212379	T	C	T	C	0.227041	0.0511034	8.88053e-06	0.0329	0.0266	0.216	FALSE	TRUE
Carboxyethyl-gaba levels	Alzheimer's disease	rs7707197	T	G	T	G	-0.142409	0.0311735	4.91796e-06	0.0253	0.0162	0.1181	FALSE	TRUE
Carboxyethyl-gaba levels	Alzheimer's disease	rs77897163	C	A	C	A	-0.230682	0.0516181	7.85825e-06	-0.0164	0.0281	0.560101	FALSE	TRUE
Carboxyethyl-gaba levels	Alzheimer's disease	rs78022645	T	C	T	C	-0.175046	0.0361585	1.29135e-06	0.0236	0.0196	0.2284	FALSE	TRUE
Sphingosine 1-phosphate levels	Alzheimer's disease	rs1000821	T	C	T	C	0.0955501	0.0152708	3.92298e-10	-0.0019	0.0082	0.8176	FALSE	TRUE
Sphingosine 1-phosphate levels	Alzheimer's disease	rs10502344	G	A	G	A	0.190151	0.0413987	4.36607e-06	-0.017	0.0218	0.4367	FALSE	TRUE
Sphingosine 1-phosphate levels	Alzheimer's disease	rs10744901	C	T	C	T	-0.0733906	0.0164198	7.83555e-06	0.0091	0.0087	0.2948	FALSE	TRUE
Sphingosine 1-phosphate levels	Alzheimer's disease	rs10960927	C	T	C	T	0.157515	0.0353441	8.32674e-06	0.029	0.0193	0.1335	FALSE	TRUE
Sphingosine 1-phosphate levels	Alzheimer's disease	rs115939317	T	C	T	C	0.27762	0.0620996	7.80146e-06	0.0016	0.034	0.9632	FALSE	TRUE
Sphingosine 1-phosphate levels	Alzheimer's disease	rs138132596	G	A	G	A	0.513535	0.109227	2.58227e-06	0.0529	0.0547	0.3338	FALSE	TRUE
Sphingosine 1-phosphate levels	Alzheimer's disease	rs140079282	A	C	A	C	-0.261606	0.056463	3.60008e-06	-0.0053	0.0316	0.866	FALSE	TRUE
Sphingosine 1-phosphate levels	Alzheimer's disease	rs141116536	C	T	C	T	0.229382	0.0484838	2.233e-06	0.0116	0.0269	0.6665	FALSE	TRUE
Sphingosine 1-phosphate levels	Alzheimer's disease	rs1456759	T	C	T	C	-0.0816351	0.0173502	2.53695e-06	0.0095	0.0093	0.3076	FALSE	TRUE
Sphingosine 1-phosphate levels	Alzheimer's disease	rs1488103	A	G	A	G	-0.0723142	0.015939	5.70756e-06	0.0107	0.0083	0.2007	FALSE	TRUE
Sphingosine 1-phosphate levels	Alzheimer's disease	rs41397245	A	G	A	G	-0.0776802	0.0161082	1.41834e-06	0.0122	0.0084	0.1471	FALSE	TRUE
Sphingosine 1-phosphate levels	Alzheimer's disease	rs6493965	G	A	G	A	-0.0718094	0.0160027	7.21237e-06	0.0025	0.0085	0.7687	FALSE	TRUE
Sphingosine 1-phosphate levels	Alzheimer's disease	rs71588370	G	A	G	A	0.184415	0.0392364	2.60043e-06	-0.0092	0.0205	0.652299	FALSE	TRUE
Sphingosine 1-phosphate levels	Alzheimer's disease	rs7200047	A	G	A	G	0.0725737	0.0157374	3.99671e-06	-0.0033	0.0082	0.684699	FALSE	TRUE
Sphingosine 1-phosphate levels	Alzheimer's disease	rs9360664	A	G	A	G	-0.0936889	0.0200697	3.03896e-06	0.0055	0.0108	0.610299	FALSE	TRUE
Glycerol to sulfate ratio	Alzheimer's disease	rs10960835	T	C	T	C	0.0629963	0.014204	9.20237e-06	0.0007	0.0082	0.9274	FALSE	TRUE
Glycerol to sulfate ratio	Alzheimer's disease	rs11176065	T	C	T	C	-0.0695849	0.0146488	2.03196e-06	0.013	0.0086	0.1277	FALSE	TRUE
Glycerol to sulfate ratio	Alzheimer's disease	rs112873937	A	G	A	G	0.147286	0.0326234	6.33915e-06	0.0384	0.0192	0.0454904	FALSE	TRUE
Glycerol to sulfate ratio	Alzheimer's disease	rs114273476	A	C	A	C	0.401454	0.0869764	3.91841e-06	0.0738	0.0462	0.11	FALSE	TRUE
Glycerol to sulfate ratio	Alzheimer's disease	rs114376408	A	G	A	G	-0.111935	0.0253364	9.96383e-06	0.0074	0.0142	0.6006	FALSE	TRUE
Glycerol to sulfate ratio	Alzheimer's disease	rs116874771	A	C	A	C	0.187001	0.0412626	5.84345e-06	-0.0192	0.0234	0.4112	FALSE	TRUE
Glycerol to sulfate ratio	Alzheimer's disease	rs118041812	G	A	G	A	0.308188	0.0635033	1.2155e-06	-0.0332	0.0356	0.3518	FALSE	TRUE
Glycerol to sulfate ratio	Alzheimer's disease	rs139079920	A	G	A	G	-0.250257	0.0562331	8.57317e-06	-0.0239	0.032	0.4558	FALSE	TRUE
Glycerol to sulfate ratio	Alzheimer's disease	rs142156573	C	A	C	A	-0.30223	0.059141	3.21587e-07	0.0676	0.0336	0.0441398	FALSE	TRUE
Glycerol to sulfate ratio	Alzheimer's disease	rs1632215	A	G	A	G	-0.0700727	0.0151983	4.01577e-06	-0.0032	0.0086	0.706999	FALSE	TRUE
Glycerol to sulfate ratio	Alzheimer's disease	rs2306885	C	A	C	A	-0.115653	0.0235655	9.21306e-07	0.0033	0.0136	0.8103	FALSE	TRUE
Glycerol to sulfate ratio	Alzheimer's disease	rs282729	C	A	C	A	0.079684	0.0163632	1.11768e-06	-0.0059	0.0097	0.5464	FALSE	TRUE
Glycerol to sulfate ratio	Alzheimer's disease	rs2846070	A	C	A	C	-0.100858	0.0222178	5.63808e-06	-0.0027	0.0128	0.8351	FALSE	TRUE
Glycerol to sulfate ratio	Alzheimer's disease	rs34437475	A	G	A	G	0.0785341	0.017477	7.00363e-06	-0.0142	0.0102	0.1656	FALSE	TRUE
Glycerol to sulfate ratio	Alzheimer's disease	rs35408848	A	G	A	G	0.0881991	0.0189635	3.30328e-06	-0.0249	0.0108	0.02119	FALSE	TRUE
Glycerol to sulfate ratio	Alzheimer's disease	rs56040563	T	C	T	C	0.111538	0.0229083	1.12226e-06	-0.0265	0.0134	0.0469905	FALSE	TRUE
Glycerol to sulfate ratio	Alzheimer's disease	rs61942622	G	T	G	T	-0.116684	0.0254146	4.40667e-06	-0.027	0.0149	0.0707196	FALSE	TRUE
Glycerol to sulfate ratio	Alzheimer's disease	rs62018653	C	T	C	T	0.138383	0.0300104	4.00374e-06	0.0062	0.0168	0.710901	FALSE	TRUE
Glycerol to sulfate ratio	Alzheimer's disease	rs6790404	T	G	T	G	0.20007	0.0445981	7.25467e-06	-0.0336	0.0265	0.2056	FALSE	TRUE
Glycerol to sulfate ratio	Alzheimer's disease	rs7662677	G	A	G	A	0.0627138	0.014098	8.65056e-06	0.0093	0.0082	0.2567	FALSE	TRUE
Glycerol to sulfate ratio	Alzheimer's disease	rs79800012	C	T	C	T	-0.41763	0.0903535	3.79736e-06	-0.0096	0.0428	0.8227	FALSE	TRUE
Myristoleate (14:1n5) levels	Alzheimer's disease	rs10164764	A	G	A	G	-0.173882	0.035576	1.02069e-06	-0.0013	0.0202	0.9493	FALSE	TRUE
Myristoleate (14:1n5) levels	Alzheimer's disease	rs113020642	C	T	C	T	-0.210761	0.044548	2.23312e-06	-0.0359	0.0245	0.1426	FALSE	TRUE
Myristoleate (14:1n5) levels	Alzheimer's disease	rs113915691	A	G	A	G	-0.142685	0.0291296	9.66861e-07	-0.0164	0.0201	0.4147	FALSE	TRUE
Myristoleate (14:1n5) levels	Alzheimer's disease	rs115386728	A	C	A	C	0.185923	0.0420823	9.95861e-06	0.0284	0.0248	0.2512	FALSE	TRUE
Myristoleate (14:1n5) levels	Alzheimer's disease	rs116885450	T	C	T	C	-0.155588	0.035151	9.5881e-06	-0.0378	0.0206	0.0658294	FALSE	TRUE
Myristoleate (14:1n5) levels	Alzheimer's disease	rs1422881	T	C	T	C	-0.0701876	0.0144292	1.14877e-06	0.0031	0.0082	0.702901	FALSE	TRUE
Myristoleate (14:1n5) levels	Alzheimer's disease	rs143706129	A	G	A	G	-0.131294	0.0278821	2.49039e-06	0.0205	0.0161	0.2036	FALSE	TRUE
Myristoleate (14:1n5) levels	Alzheimer's disease	rs148890850	T	C	T	C	0.18222	0.0411292	9.40481e-06	0.0237	0.024	0.3235	FALSE	TRUE
Myristoleate (14:1n5) levels	Alzheimer's disease	rs180670669	A	G	A	G	0.150671	0.0289097	1.87049e-07	-0.0313	0.0172	0.0680895	FALSE	TRUE
Myristoleate (14:1n5) levels	Alzheimer's disease	rs182193976	A	G	A	G	-0.286231	0.0633995	6.34035e-06	-0.0007	0.0377	0.9843	FALSE	TRUE
Myristoleate (14:1n5) levels	Alzheimer's disease	rs2371397	A	G	A	G	-0.0705478	0.0147874	1.83486e-06	0.0122	0.0083	0.1417	FALSE	TRUE
Myristoleate (14:1n5) levels	Alzheimer's disease	rs291035	A	C	A	C	0.0867177	0.0190835	5.51661e-06	-0.0024	0.011	0.8275	FALSE	TRUE
Myristoleate (14:1n5) levels	Alzheimer's disease	rs603424	A	G	A	G	-0.0971173	0.0185985	1.7722e-07	-0.0169	0.0103	0.1009	FALSE	TRUE
Myristoleate (14:1n5) levels	Alzheimer's disease	rs621211	C	T	C	T	0.0659414	0.0144655	5.15159e-06	0.0062	0.0082	0.4536	FALSE	TRUE
Myristoleate (14:1n5) levels	Alzheimer's disease	rs78325276	C	T	C	T	-0.106697	0.0236829	6.62972e-06	-0.0295	0.0139	0.0333803	FALSE	TRUE
Myristoleate (14:1n5) levels	Alzheimer's disease	rs80053496	A	G	A	G	-0.219127	0.0491706	8.33207e-06	-0.0236	0.0278	0.3976	FALSE	TRUE
Myristoleate (14:1n5) levels	Alzheimer's disease	rs8024577	T	C	T	C	-0.0687812	0.0146636	2.72394e-06	0.0098	0.0085	0.2492	FALSE	TRUE
Suberate (C8-DC) levels	Alzheimer's disease	rs10008401	C	T	C	T	0.0800086	0.0170477	2.68944e-06	0.0096	0.0083	0.2514	FALSE	TRUE
Suberate (C8-DC) levels	Alzheimer's disease	rs11158833	G	A	G	A	-0.0922378	0.0196709	2.74475e-06	-0.0135	0.0095	0.1535	FALSE	TRUE
Suberate (C8-DC) levels	Alzheimer's disease	rs11705994	T	C	T	C	0.218723	0.0493421	9.30183e-06	-0.036	0.0222	0.1052	FALSE	TRUE
Suberate (C8-DC) levels	Alzheimer's disease	rs117499033	G	A	G	A	0.30721	0.0691456	8.87382e-06	-0.0437	0.0366	0.2323	FALSE	TRUE
Suberate (C8-DC) levels	Alzheimer's disease	rs140580838	A	G	A	G	0.308493	0.0695392	9.15411e-06	0.0195	0.0328	0.5535	FALSE	TRUE
Suberate (C8-DC) levels	Alzheimer's disease	rs141183746	C	A	C	A	0.161019	0.0364413	9.93437e-06	-0.0081	0.0178	0.6479	FALSE	TRUE
Suberate (C8-DC) levels	Alzheimer's disease	rs145406199	A	G	A	G	0.37263	0.0837642	8.64482e-06	0.0131	0.0471	0.7802	FALSE	TRUE
Suberate (C8-DC) levels	Alzheimer's disease	rs146529314	G	T	G	T	0.336938	0.0697181	1.34585e-06	-0.0082	0.0381	0.8301	FALSE	TRUE
Suberate (C8-DC) levels	Alzheimer's disease	rs1551619	T	C	T	C	-0.0957862	0.0197795	1.28083e-06	0.0127	0.0096	0.185	FALSE	TRUE
Suberate (C8-DC) levels	Alzheimer's disease	rs17738405	C	T	C	T	-0.193637	0.0395206	9.60098e-07	-0.0046	0.02	0.8169	FALSE	TRUE
Suberate (C8-DC) levels	Alzheimer's disease	rs34357043	G	T	G	T	0.266628	0.0551228	1.31829e-06	0.0345	0.0283	0.2231	FALSE	TRUE
Suberate (C8-DC) levels	Alzheimer's disease	rs35904890	T	C	T	C	-0.227287	0.0499103	5.26594e-06	0.0234	0.0251	0.3513	FALSE	TRUE
Suberate (C8-DC) levels	Alzheimer's disease	rs4689177	T	C	T	C	0.108829	0.023723	4.48615e-06	-0.0122	0.0117	0.2949	FALSE	TRUE
Suberate (C8-DC) levels	Alzheimer's disease	rs4695288	T	C	T	C	0.200323	0.0453191	9.85766e-06	-0.0464	0.0222	0.03684	FALSE	TRUE
Suberate (C8-DC) levels	Alzheimer's disease	rs539316238	T	C	T	C	-0.273918	0.059083	3.54953e-06	0.0019	0.031	0.9523	FALSE	TRUE
Suberate (C8-DC) levels	Alzheimer's disease	rs6914551	C	T	C	T	-0.366135	0.0791195	3.69883e-06	0.0196	0.0342	0.567	FALSE	TRUE
Suberate (C8-DC) levels	Alzheimer's disease	rs72777931	A	G	A	G	0.336072	0.0690214	1.12109e-06	-0.0128	0.0356	0.7185	FALSE	TRUE
Suberate (C8-DC) levels	Alzheimer's disease	rs7616744	A	G	A	G	-0.0876962	0.0198179	9.63944e-06	0.0112	0.0101	0.2636	FALSE	TRUE
Suberate (C8-DC) levels	Alzheimer's disease	rs78440527	G	A	G	A	0.199278	0.0447114	8.31185e-06	-0.0191	0.024	0.4278	FALSE	TRUE
Suberate (C8-DC) levels	Alzheimer's disease	rs9313297	G	A	G	A	0.0991772	0.0219344	6.13931e-06	-0.0049	0.0107	0.6459	FALSE	TRUE
Suberate (C8-DC) levels	Alzheimer's disease	rs9406110	A	G	A	G	-0.0894199	0.0200898	8.54658e-06	-0.0138	0.0096	0.1522	FALSE	TRUE
2'-deoxyuridine to cytidine ratio	Alzheimer's disease	rs10008952	T	G	T	G	-0.0785743	0.0176208	8.22747e-06	-0.0143	0.0095	0.1332	FALSE	TRUE
2'-deoxyuridine to cytidine ratio	Alzheimer's disease	rs112300176	A	G	A	G	0.149748	0.0326135	4.39841e-06	-0.0156	0.0176	0.3728	FALSE	TRUE
2'-deoxyuridine to cytidine ratio	Alzheimer's disease	rs113355690	T	C	T	C	-0.357174	0.0760301	2.62988e-06	-0.0001	0.0351	0.9968	FALSE	TRUE
2'-deoxyuridine to cytidine ratio	Alzheimer's disease	rs116556966	G	T	G	T	-0.166019	0.0358631	3.66978e-06	-0.0091	0.0189	0.6294	FALSE	TRUE
2'-deoxyuridine to cytidine ratio	Alzheimer's disease	rs116906001	A	G	A	G	0.442827	0.0974639	5.53271e-06	-0.0053	0.0521	0.9187	FALSE	TRUE
2'-deoxyuridine to cytidine ratio	Alzheimer's disease	rs117823060	A	C	A	C	-0.373887	0.0774768	1.39446e-06	0.0008	0.0358	0.9813	FALSE	TRUE
2'-deoxyuridine to cytidine ratio	Alzheimer's disease	rs12913954	C	T	C	T	-0.326167	0.0713818	4.89286e-06	0.0293	0.034	0.3886	FALSE	TRUE
2'-deoxyuridine to cytidine ratio	Alzheimer's disease	rs131794	C	A	C	A	-0.181284	0.0190013	1.4198e-21	0.0181	0.0099	0.0659007	FALSE	TRUE
2'-deoxyuridine to cytidine ratio	Alzheimer's disease	rs141476650	G	T	G	T	-0.322528	0.0669604	1.45958e-06	-0.0207	0.0377	0.583201	FALSE	TRUE
2'-deoxyuridine to cytidine ratio	Alzheimer's disease	rs143134280	T	G	T	G	0.362612	0.0805447	6.73191e-06	-0.0146	0.0449	0.745	FALSE	TRUE
2'-deoxyuridine to cytidine ratio	Alzheimer's disease	rs145761741	A	G	A	G	0.277772	0.0586629	2.18998e-06	-0.0799	0.0293	0.00637397	FALSE	TRUE
2'-deoxyuridine to cytidine ratio	Alzheimer's disease	rs151297248	T	C	T	C	-0.278884	0.0628064	8.9801e-06	-0.0138	0.0356	0.6977	FALSE	TRUE
2'-deoxyuridine to cytidine ratio	Alzheimer's disease	rs16881066	G	A	G	A	0.157422	0.0326405	1.41491e-06	-0.0078	0.0175	0.656	FALSE	TRUE
2'-deoxyuridine to cytidine ratio	Alzheimer's disease	rs17600621	G	A	G	A	-0.274658	0.0592953	3.62074e-06	-0.0168	0.0304	0.5798	FALSE	TRUE
2'-deoxyuridine to cytidine ratio	Alzheimer's disease	rs192597	T	C	T	C	-0.0907469	0.019614	3.71656e-06	-0.0043	0.0101	0.668399	FALSE	TRUE
2'-deoxyuridine to cytidine ratio	Alzheimer's disease	rs2654984	G	T	G	T	0.245473	0.0497299	7.96928e-07	0.041	0.028	0.1428	FALSE	TRUE
2'-deoxyuridine to cytidine ratio	Alzheimer's disease	rs28534801	A	C	A	C	0.0776739	0.0173966	8.01094e-06	-0.0073	0.009	0.4207	FALSE	TRUE
2'-deoxyuridine to cytidine ratio	Alzheimer's disease	rs3101237	C	T	C	T	-0.331116	0.0737143	7.05941e-06	0.0481	0.0373	0.1974	FALSE	TRUE
2'-deoxyuridine to cytidine ratio	Alzheimer's disease	rs3912457	A	G	A	G	0.126923	0.0277656	4.84843e-06	-0.0017	0.0148	0.9085	FALSE	TRUE
2'-deoxyuridine to cytidine ratio	Alzheimer's disease	rs56159502	A	G	A	G	0.108044	0.0230981	2.90262e-06	0.0299	0.0118	0.0113899	FALSE	TRUE
2'-deoxyuridine to cytidine ratio	Alzheimer's disease	rs6823417	T	C	T	C	0.0884486	0.0182976	1.33882e-06	-0.0082	0.0093	0.3781	FALSE	TRUE
2'-deoxyuridine to cytidine ratio	Alzheimer's disease	rs72754978	C	T	C	T	0.200677	0.0340059	3.60798e-09	-0.0064	0.016	0.692	FALSE	TRUE
2'-deoxyuridine to cytidine ratio	Alzheimer's disease	rs72854220	C	T	C	T	0.0958138	0.0209036	4.57021e-06	-0.0189	0.011	0.0876496	FALSE	TRUE
2'-deoxyuridine to cytidine ratio	Alzheimer's disease	rs7387417	T	C	T	C	-0.0967892	0.0204824	2.29557e-06	0.0026	0.0106	0.8054	FALSE	TRUE
2'-deoxyuridine to cytidine ratio	Alzheimer's disease	rs883555	G	A	G	A	-0.123877	0.027098	4.84374e-06	-0.0323	0.0137	0.0187802	FALSE	TRUE
tryptophan to tyrosine ratio	Alzheimer's disease	rs10009978	T	C	T	C	-0.113294	0.0252828	7.42704e-06	0.0065	0.0136	0.635199	FALSE	TRUE
tryptophan to tyrosine ratio	Alzheimer's disease	rs10900054	A	C	A	C	-0.0839601	0.0183877	4.96886e-06	0.0062	0.0099	0.5315	FALSE	TRUE
tryptophan to tyrosine ratio	Alzheimer's disease	rs11120709	T	C	T	C	-0.0708252	0.0152387	3.35622e-06	0.0013	0.0082	0.8755	FALSE	TRUE
tryptophan to tyrosine ratio	Alzheimer's disease	rs1134464	A	C	A	C	0.0752621	0.0163602	4.21867e-06	0.0003	0.0088	0.9756	FALSE	TRUE
tryptophan to tyrosine ratio	Alzheimer's disease	rs113778185	C	T	C	T	0.360767	0.0809195	8.25965e-06	0.0866	0.043	0.0439501	FALSE	TRUE
tryptophan to tyrosine ratio	Alzheimer's disease	rs1176456	C	T	C	T	-0.0729549	0.0156336	3.06302e-06	0.0006	0.0083	0.9397	FALSE	TRUE
tryptophan to tyrosine ratio	Alzheimer's disease	rs117958383	C	T	C	T	-0.252699	0.0511689	7.87163e-07	0.0297	0.0286	0.3	FALSE	TRUE
tryptophan to tyrosine ratio	Alzheimer's disease	rs12212085	C	A	C	A	-0.120797	0.0212987	1.4149e-08	0.0137	0.0114	0.2301	FALSE	TRUE
tryptophan to tyrosine ratio	Alzheimer's disease	rs139751958	A	G	A	G	0.479615	0.0951437	4.63224e-07	-0.0095	0.0431	0.8248	FALSE	TRUE
tryptophan to tyrosine ratio	Alzheimer's disease	rs146254089	A	G	A	G	0.305752	0.0611545	5.74291e-07	-0.0536	0.0287	0.0620297	FALSE	TRUE
tryptophan to tyrosine ratio	Alzheimer's disease	rs17838916	A	G	A	G	0.241305	0.048915	8.09169e-07	-0.0349	0.0252	0.1665	FALSE	TRUE
tryptophan to tyrosine ratio	Alzheimer's disease	rs2064508	C	T	C	T	0.262641	0.0583905	6.85913e-06	-0.0314	0.0305	0.3044	FALSE	TRUE
tryptophan to tyrosine ratio	Alzheimer's disease	rs2454663	C	T	C	T	-0.106097	0.0182433	6.03957e-09	-0.0046	0.0098	0.637101	FALSE	TRUE
tryptophan to tyrosine ratio	Alzheimer's disease	rs41523449	A	G	A	G	0.107274	0.0225174	1.89731e-06	0.012	0.0126	0.3434	FALSE	TRUE
tryptophan to tyrosine ratio	Alzheimer's disease	rs55775622	G	T	G	T	0.0691913	0.0155529	8.63641e-06	-0.0094	0.0085	0.2674	FALSE	TRUE
tryptophan to tyrosine ratio	Alzheimer's disease	rs61876075	G	A	G	A	0.166145	0.0369459	6.89239e-06	0.0254	0.0193	0.188	FALSE	TRUE
tryptophan to tyrosine ratio	Alzheimer's disease	rs66532723	A	G	A	G	-0.252806	0.054655	3.73704e-06	0.061	0.0301	0.0430398	FALSE	TRUE
tryptophan to tyrosine ratio	Alzheimer's disease	rs72774053	A	G	A	G	-0.343489	0.0776041	9.59187e-06	-0.0114	0.0391	0.770699	FALSE	TRUE
tryptophan to tyrosine ratio	Alzheimer's disease	rs77268855	A	G	A	G	-0.14896	0.0336054	9.31002e-06	0.0084	0.0178	0.637901	FALSE	TRUE
tryptophan to tyrosine ratio	Alzheimer's disease	rs77521810	G	A	G	A	-0.118387	0.0266391	8.82485e-06	-0.0125	0.0159	0.4318	FALSE	TRUE
tryptophan to tyrosine ratio	Alzheimer's disease	rs79823475	C	T	C	T	0.237203	0.0492292	1.4476e-06	0.0476	0.0283	0.0925806	FALSE	TRUE
7-methylguanine levels	Alzheimer's disease	rs10010973	G	T	G	T	0.089141	0.0199241	7.67584e-06	-0.0019	0.0108	0.8641	FALSE	TRUE
7-methylguanine levels	Alzheimer's disease	rs11112541	T	C	T	C	-0.219857	0.0495863	9.25799e-06	-0.0043	0.0264	0.8702	FALSE	TRUE
7-methylguanine levels	Alzheimer's disease	rs111583939	G	A	G	A	-0.234037	0.05152	5.55514e-06	-0.0137	0.0292	0.6381	FALSE	TRUE
7-methylguanine levels	Alzheimer's disease	rs115467519	A	G	A	G	0.309872	0.0676507	4.63936e-06	0.0333	0.04	0.4057	FALSE	TRUE
7-methylguanine levels	Alzheimer's disease	rs13394146	T	C	T	C	-0.0690565	0.0153139	6.50093e-06	0.0223	0.0083	0.00701504	FALSE	TRUE
7-methylguanine levels	Alzheimer's disease	rs141133698	A	G	A	G	-0.222582	0.0453286	9.08805e-07	-0.0186	0.0246	0.450199	FALSE	TRUE
7-methylguanine levels	Alzheimer's disease	rs142581143	A	G	A	G	0.203486	0.0423817	1.57665e-06	0.0272	0.0239	0.2548	FALSE	TRUE
7-methylguanine levels	Alzheimer's disease	rs144952996	G	A	G	A	0.33795	0.0711155	2.01282e-06	-0.0328	0.0365	0.3681	FALSE	TRUE
7-methylguanine levels	Alzheimer's disease	rs150494060	C	T	C	T	0.323048	0.0720741	7.38917e-06	0.0153	0.0368	0.677699	FALSE	TRUE
7-methylguanine levels	Alzheimer's disease	rs250975	T	C	T	C	0.0684281	0.0154642	9.64755e-06	0.0054	0.0083	0.5177	FALSE	TRUE
7-methylguanine levels	Alzheimer's disease	rs2596928	C	T	C	T	0.145542	0.0294467	7.71009e-07	0.0332	0.0159	0.0376296	FALSE	TRUE
7-methylguanine levels	Alzheimer's disease	rs55754655	G	A	G	A	-0.157024	0.021644	4.02126e-13	0.011	0.0116	0.3451	FALSE	TRUE
7-methylguanine levels	Alzheimer's disease	rs59405278	T	G	T	G	-0.355676	0.0775087	4.45691e-06	0.052	0.0382	0.1734	FALSE	TRUE
7-methylguanine levels	Alzheimer's disease	rs61736966	G	A	G	A	0.310436	0.0650739	1.83753e-06	-0.0411	0.0351	0.2417	FALSE	TRUE
7-methylguanine levels	Alzheimer's disease	rs62199434	C	T	C	T	-0.0797547	0.0171287	3.22085e-06	0.0032	0.0095	0.738501	FALSE	TRUE
7-methylguanine levels	Alzheimer's disease	rs62531487	G	A	G	A	-0.0822376	0.0182285	6.43762e-06	-0.009	0.0099	0.3653	FALSE	TRUE
7-methylguanine levels	Alzheimer's disease	rs7311325	C	T	C	T	0.224426	0.0504602	8.68385e-06	0.0017	0.0278	0.952	FALSE	TRUE
7-methylguanine levels	Alzheimer's disease	rs75118450	C	T	C	T	-0.246307	0.0557383	9.91638e-06	-0.0021	0.03	0.9441	FALSE	TRUE
7-methylguanine levels	Alzheimer's disease	rs75607471	T	C	T	C	0.231536	0.0513179	6.42785e-06	-0.0263	0.0289	0.3635	FALSE	TRUE
7-methylguanine levels	Alzheimer's disease	rs78324169	G	A	G	A	0.176367	0.0350844	4.98389e-07	-0.0144	0.0189	0.4465	FALSE	TRUE
4-oxo-retinoic acid levels	Alzheimer's disease	rs10011241	C	T	C	T	-0.248843	0.0551649	6.4555e-06	0.0186	0.0276	0.4998	FALSE	TRUE
4-oxo-retinoic acid levels	Alzheimer's disease	rs115655613	A	G	A	G	-0.25946	0.0582273	8.35082e-06	0.0292	0.0311	0.3492	FALSE	TRUE
4-oxo-retinoic acid levels	Alzheimer's disease	rs12606866	C	A	C	A	0.0799338	0.0165651	1.39692e-06	0.01	0.0086	0.2457	FALSE	TRUE
4-oxo-retinoic acid levels	Alzheimer's disease	rs150127605	A	G	A	G	-0.194071	0.0382941	4.02209e-07	0.0266	0.02	0.1838	FALSE	TRUE
4-oxo-retinoic acid levels	Alzheimer's disease	rs241600	G	T	G	T	-0.0759212	0.0164265	3.80297e-06	0.0011	0.0082	0.892	FALSE	TRUE
4-oxo-retinoic acid levels	Alzheimer's disease	rs2596811	T	C	T	C	-0.0814821	0.0173003	2.47887e-06	-0.013	0.0088	0.1385	FALSE	TRUE
4-oxo-retinoic acid levels	Alzheimer's disease	rs4990638	C	T	C	T	-0.127511	0.027789	4.46333e-06	0.0027	0.0141	0.8467	FALSE	TRUE
4-oxo-retinoic acid levels	Alzheimer's disease	rs603424	A	G	A	G	0.0962566	0.0209516	4.34331e-06	-0.0169	0.0103	0.1009	FALSE	TRUE
4-oxo-retinoic acid levels	Alzheimer's disease	rs66531867	G	A	G	A	0.150729	0.0317899	2.12222e-06	-0.0048	0.0155	0.757699	FALSE	TRUE
4-oxo-retinoic acid levels	Alzheimer's disease	rs6721929	C	T	C	T	-0.0756867	0.0162295	3.10817e-06	0.0054	0.0083	0.5177	FALSE	TRUE
4-oxo-retinoic acid levels	Alzheimer's disease	rs72551330	C	T	C	T	0.496596	0.0659387	5.0288e-14	-0.0318	0.0345	0.3569	FALSE	TRUE
4-oxo-retinoic acid levels	Alzheimer's disease	rs72831044	G	T	G	T	-0.131909	0.0292344	6.41847e-06	0.0112	0.0148	0.4494	FALSE	TRUE
Cis-3,4-methyleneheptanoylcarnitine levels	Alzheimer's disease	rs1001145	C	T	C	T	0.0806537	0.0176193	4.70366e-06	-0.0027	0.0097	0.7771	FALSE	TRUE
Cis-3,4-methyleneheptanoylcarnitine levels	Alzheimer's disease	rs1047891	A	C	A	C	-0.0775517	0.016503	2.61135e-06	-0.004	0.0088	0.6482	FALSE	TRUE
Cis-3,4-methyleneheptanoylcarnitine levels	Alzheimer's disease	rs11256316	G	A	G	A	0.121665	0.0259446	2.73985e-06	-0.0152	0.0142	0.2836	FALSE	TRUE
Cis-3,4-methyleneheptanoylcarnitine levels	Alzheimer's disease	rs1171615	T	C	T	C	0.151311	0.0184204	2.13395e-16	-0.0074	0.0096	0.441	FALSE	TRUE
Cis-3,4-methyleneheptanoylcarnitine levels	Alzheimer's disease	rs117842847	T	G	T	G	-0.823781	0.169975	1.2567e-06	-0.0045	0.0677	0.9476	FALSE	TRUE
Cis-3,4-methyleneheptanoylcarnitine levels	Alzheimer's disease	rs118119345	G	A	G	A	-0.330777	0.0742665	8.4318e-06	-0.0069	0.0377	0.8555	FALSE	TRUE
Cis-3,4-methyleneheptanoylcarnitine levels	Alzheimer's disease	rs12642833	G	A	G	A	-0.0693011	0.015442	7.19511e-06	-0.0019	0.0084	0.8186	FALSE	TRUE
Cis-3,4-methyleneheptanoylcarnitine levels	Alzheimer's disease	rs1290650	G	A	G	A	0.0699397	0.0152721	4.65952e-06	-0.0067	0.0087	0.4445	FALSE	TRUE
Cis-3,4-methyleneheptanoylcarnitine levels	Alzheimer's disease	rs139358468	C	T	C	T	0.282336	0.0597716	2.31732e-06	-0.0343	0.031	0.2681	FALSE	TRUE
Cis-3,4-methyleneheptanoylcarnitine levels	Alzheimer's disease	rs141575755	A	G	A	G	-0.202039	0.0395707	3.29478e-07	-0.0269	0.0213	0.2062	FALSE	TRUE
Cis-3,4-methyleneheptanoylcarnitine levels	Alzheimer's disease	rs147886311	T	C	T	C	-0.415495	0.0922822	6.71781e-06	-0.0417	0.0467	0.3726	FALSE	TRUE
Cis-3,4-methyleneheptanoylcarnitine levels	Alzheimer's disease	rs247001	G	A	G	A	-0.0707454	0.0153159	3.85428e-06	0.008	0.0082	0.3285	FALSE	TRUE
Cis-3,4-methyleneheptanoylcarnitine levels	Alzheimer's disease	rs324420	A	C	A	C	-0.0846083	0.0186619	5.79481e-06	0.0044	0.0101	0.662	FALSE	TRUE
Cis-3,4-methyleneheptanoylcarnitine levels	Alzheimer's disease	rs4740797	A	G	A	G	0.132106	0.0275694	1.65317e-06	0.0063	0.0143	0.6584	FALSE	TRUE
Cis-3,4-methyleneheptanoylcarnitine levels	Alzheimer's disease	rs476451	T	C	T	C	0.0867827	0.0179656	1.36196e-06	-0.0055	0.0096	0.566601	FALSE	TRUE
Cis-3,4-methyleneheptanoylcarnitine levels	Alzheimer's disease	rs4770259	A	C	A	C	0.132541	0.0293301	6.21452e-06	0.0275	0.0149	0.0641505	FALSE	TRUE
Cis-3,4-methyleneheptanoylcarnitine levels	Alzheimer's disease	rs56212584	G	A	G	A	-0.116414	0.0248532	2.81215e-06	0.032	0.0143	0.0255	FALSE	TRUE
Cis-3,4-methyleneheptanoylcarnitine levels	Alzheimer's disease	rs78382346	A	G	A	G	-0.128511	0.0273301	2.57379e-06	-0.0046	0.0156	0.7703	FALSE	TRUE
Cis-3,4-methyleneheptanoylcarnitine levels	Alzheimer's disease	rs80254170	G	A	G	A	-0.257157	0.0284005	1.36992e-19	-0.0288	0.0158	0.0679094	FALSE	TRUE
Succinate levels	Alzheimer's disease	rs10011572	T	G	T	G	-0.0926567	0.0204757	6.0337e-06	-0.0087	0.0107	0.4175	FALSE	TRUE
Succinate levels	Alzheimer's disease	rs11176426	T	C	T	C	0.117747	0.0260672	6.27123e-06	-0.0114	0.0135	0.3979	FALSE	TRUE
Succinate levels	Alzheimer's disease	rs112395657	G	A	G	A	-0.207437	0.0450335	4.09913e-06	-0.007	0.0232	0.7623	FALSE	TRUE
Succinate levels	Alzheimer's disease	rs117024175	T	C	T	C	-1.49269	0.324998	4.3708e-06	-0.0096	0.0956	0.9198	FALSE	TRUE
Succinate levels	Alzheimer's disease	rs118001555	A	G	A	G	0.411317	0.0858296	1.6492e-06	0.0181	0.0523	0.7294	FALSE	TRUE
Succinate levels	Alzheimer's disease	rs118145288	C	A	C	A	-0.206492	0.0449668	4.38834e-06	0.0464	0.0235	0.0480297	FALSE	TRUE
Succinate levels	Alzheimer's disease	rs12207685	T	C	T	C	-0.222838	0.0496088	7.05938e-06	0.0123	0.025	0.6229	FALSE	TRUE
Succinate levels	Alzheimer's disease	rs1333261	T	C	T	C	-0.0871587	0.0185301	2.55579e-06	-0.0066	0.0097	0.4984	FALSE	TRUE
Succinate levels	Alzheimer's disease	rs138715624	T	C	T	C	-0.335794	0.0717246	2.84484e-06	0.0081	0.0409	0.8429	FALSE	TRUE
Succinate levels	Alzheimer's disease	rs139641222	C	T	C	T	-0.366247	0.0792815	3.84533e-06	-0.0628	0.0371	0.0899705	FALSE	TRUE
Succinate levels	Alzheimer's disease	rs34466066	G	T	G	T	-0.0929812	0.0207978	7.79595e-06	0.0001	0.011	0.9953	FALSE	TRUE
Succinate levels	Alzheimer's disease	rs390266	A	G	A	G	0.0791891	0.01709	3.59263e-06	0.0062	0.0092	0.5006	FALSE	TRUE
Succinate levels	Alzheimer's disease	rs4837476	C	T	C	T	-0.0914604	0.0196758	3.34575e-06	0.0078	0.0103	0.4478	FALSE	TRUE
Succinate levels	Alzheimer's disease	rs6784383	C	T	C	T	0.307822	0.066611	3.81565e-06	-0.0534	0.0373	0.1525	FALSE	TRUE
Succinate levels	Alzheimer's disease	rs6794935	T	G	T	G	0.0825503	0.0186111	9.18455e-06	-0.0271	0.0096	0.00450599	FALSE	TRUE
Succinate levels	Alzheimer's disease	rs75039175	T	C	T	C	0.391887	0.088507	9.52232e-06	-0.0777	0.0472	0.0995291	FALSE	TRUE
Succinate levels	Alzheimer's disease	rs75063089	A	G	A	G	-0.443762	0.0899821	8.15279e-07	-0.0385	0.0576	0.5043	FALSE	TRUE
Succinate levels	Alzheimer's disease	rs75318517	T	C	T	C	-0.231443	0.0522607	9.48391e-06	0.0515	0.0268	0.0548302	FALSE	TRUE
Succinate levels	Alzheimer's disease	rs75668162	T	C	T	C	-0.374901	0.0808559	3.54099e-06	-0.0236	0.0424	0.5776	FALSE	TRUE
Succinate levels	Alzheimer's disease	rs75840919	T	C	T	C	0.218053	0.0480726	5.73585e-06	-0.0612	0.0252	0.0150699	FALSE	TRUE
Succinate levels	Alzheimer's disease	rs77933094	C	T	C	T	-0.347294	0.0782691	9.11467e-06	-0.0228	0.0409	0.5774	FALSE	TRUE
Succinate levels	Alzheimer's disease	rs78010144	G	A	G	A	-0.457238	0.0952845	1.59729e-06	-0.0301	0.0495	0.5438	FALSE	TRUE
Succinate levels	Alzheimer's disease	rs79884158	T	C	T	C	-0.384004	0.0855067	7.09155e-06	0.0826	0.0429	0.0540505	FALSE	TRUE
Succinate levels	Alzheimer's disease	rs9905991	G	A	G	A	0.0718758	0.0157695	5.16671e-06	-0.0083	0.0082	0.3127	FALSE	TRUE
2-hydroxy-4-(methylthio)butanoic acid levels	Alzheimer's disease	rs10011993	C	A	C	A	0.0809351	0.0154775	1.70236e-07	0.0074	0.0084	0.3776	FALSE	TRUE
2-hydroxy-4-(methylthio)butanoic acid levels	Alzheimer's disease	rs10766467	C	T	C	T	-0.170109	0.0148559	2.33439e-30	0.0208	0.0082	0.0112499	FALSE	TRUE
2-hydroxy-4-(methylthio)butanoic acid levels	Alzheimer's disease	rs10923821	T	C	T	C	0.0767595	0.0163212	2.56298e-06	-0.0047	0.0087	0.5863	FALSE	TRUE
2-hydroxy-4-(methylthio)butanoic acid levels	Alzheimer's disease	rs113090967	A	G	A	G	0.0975091	0.0215752	6.19887e-06	-0.0018	0.0117	0.879	FALSE	TRUE
2-hydroxy-4-(methylthio)butanoic acid levels	Alzheimer's disease	rs114261009	A	C	A	C	-0.450884	0.0974594	3.7212e-06	0.014	0.0491	0.7754	FALSE	TRUE
2-hydroxy-4-(methylthio)butanoic acid levels	Alzheimer's disease	rs11522698	A	G	A	G	0.0890865	0.0172276	2.32662e-07	-0.023	0.0093	0.0131701	FALSE	TRUE
2-hydroxy-4-(methylthio)butanoic acid levels	Alzheimer's disease	rs116952655	G	T	G	T	-0.267896	0.0576902	3.42234e-06	0.0236	0.0349	0.4987	FALSE	TRUE
2-hydroxy-4-(methylthio)butanoic acid levels	Alzheimer's disease	rs140959752	A	C	A	C	-0.163506	0.0370121	9.97848e-06	0.0131	0.0203	0.5192	FALSE	TRUE
2-hydroxy-4-(methylthio)butanoic acid levels	Alzheimer's disease	rs141331	A	G	A	G	0.0720263	0.0154888	3.316e-06	-0.0233	0.0083	0.00511105	FALSE	TRUE
2-hydroxy-4-(methylthio)butanoic acid levels	Alzheimer's disease	rs142801739	T	C	T	C	0.231748	0.045844	4.30065e-07	-0.0273	0.0267	0.3064	FALSE	TRUE
2-hydroxy-4-(methylthio)butanoic acid levels	Alzheimer's disease	rs183640109	A	G	A	G	0.222992	0.0500859	8.49971e-06	0.0164	0.0279	0.5571	FALSE	TRUE
2-hydroxy-4-(methylthio)butanoic acid levels	Alzheimer's disease	rs1846285	G	A	G	A	0.0890115	0.019355	4.24745e-06	0.0148	0.0106	0.1638	FALSE	TRUE
2-hydroxy-4-(methylthio)butanoic acid levels	Alzheimer's disease	rs186411642	A	C	A	C	-0.556826	0.11826	2.49554e-06	0.0843	0.0653	0.1969	FALSE	TRUE
2-hydroxy-4-(methylthio)butanoic acid levels	Alzheimer's disease	rs2126886	T	C	T	C	0.082341	0.0183291	7.04362e-06	-0.0001	0.0097	0.9926	FALSE	TRUE
2-hydroxy-4-(methylthio)butanoic acid levels	Alzheimer's disease	rs2765527	C	T	C	T	-0.436372	0.0142751	1e-200	0.0083	0.0081	0.3064	FALSE	TRUE
2-hydroxy-4-(methylthio)butanoic acid levels	Alzheimer's disease	rs4656106	C	T	C	T	-0.109283	0.02028	7.09698e-08	0.0128	0.0113	0.2579	FALSE	TRUE
2-hydroxy-4-(methylthio)butanoic acid levels	Alzheimer's disease	rs490379	C	A	C	A	-0.124448	0.0218311	1.19464e-08	-0.002	0.0119	0.8673	FALSE	TRUE
2-hydroxy-4-(methylthio)butanoic acid levels	Alzheimer's disease	rs59543093	T	C	T	C	-0.185892	0.0385756	1.44355e-06	-0.018	0.0206	0.3828	FALSE	TRUE
2-hydroxy-4-(methylthio)butanoic acid levels	Alzheimer's disease	rs62045233	A	C	A	C	-0.136479	0.0307356	8.97816e-06	-0.0027	0.0169	0.8726	FALSE	TRUE
2-hydroxy-4-(methylthio)butanoic acid levels	Alzheimer's disease	rs6425192	C	T	C	T	-0.121753	0.0159879	2.63037e-14	-0.0062	0.0086	0.4696	FALSE	TRUE
2-hydroxy-4-(methylthio)butanoic acid levels	Alzheimer's disease	rs66511710	G	A	G	A	-0.0685605	0.0154767	9.42741e-06	0.0015	0.0084	0.8555	FALSE	TRUE
2-hydroxy-4-(methylthio)butanoic acid levels	Alzheimer's disease	rs75703698	C	T	C	T	0.274488	0.0602033	5.13135e-06	-0.0071	0.0336	0.8318	FALSE	TRUE
2-hydroxy-4-(methylthio)butanoic acid levels	Alzheimer's disease	rs9566434	G	T	G	T	0.586696	0.128145	4.68612e-06	0.0533	0.0545	0.3281	FALSE	TRUE
Picolinate levels	Alzheimer's disease	rs10013439	A	G	A	G	-0.113268	0.0255182	9.05026e-06	0.0023	0.0124	0.8552	FALSE	TRUE
Picolinate levels	Alzheimer's disease	rs10165615	A	G	A	G	-0.0765678	0.0165386	3.66296e-06	-0.0131	0.0081	0.1063	FALSE	TRUE
Picolinate levels	Alzheimer's disease	rs1047891	A	C	A	C	-0.104752	0.017993	5.82115e-09	-0.004	0.0088	0.6482	FALSE	TRUE
Picolinate levels	Alzheimer's disease	rs116572752	A	G	A	G	-0.222458	0.0476773	3.07255e-06	0.0186	0.0238	0.4352	FALSE	TRUE
Picolinate levels	Alzheimer's disease	rs1170931	T	C	T	C	0.0799666	0.0166158	1.48919e-06	0.0032	0.0081	0.6941	FALSE	TRUE
Picolinate levels	Alzheimer's disease	rs118128689	C	T	C	T	0.444047	0.0991152	7.46035e-06	-0.0049	0.0555	0.9293	FALSE	TRUE
Picolinate levels	Alzheimer's disease	rs13184770	G	A	G	A	0.0754414	0.016819	7.27516e-06	0.0019	0.0082	0.8162	FALSE	TRUE
Picolinate levels	Alzheimer's disease	rs148152439	A	G	A	G	-0.238828	0.0516818	3.8167e-06	0.01	0.0245	0.6832	FALSE	TRUE
Picolinate levels	Alzheimer's disease	rs164749	G	T	G	T	0.14552	0.0164579	9.40488e-19	0.0203	0.0082	0.01322	FALSE	TRUE
Picolinate levels	Alzheimer's disease	rs17557932	T	C	T	C	-0.094645	0.0190838	7.06971e-07	-0.0063	0.0094	0.5011	FALSE	TRUE
Picolinate levels	Alzheimer's disease	rs3823118	A	G	A	G	0.149643	0.0316259	2.22698e-06	0.0139	0.0146	0.3404	FALSE	TRUE
Picolinate levels	Alzheimer's disease	rs4392119	C	T	C	T	0.250848	0.0503664	6.34331e-07	-0.004	0.0255	0.8748	FALSE	TRUE
Picolinate levels	Alzheimer's disease	rs71486039	T	C	T	C	-0.289532	0.0653581	9.42607e-06	0.0297	0.0326	0.362	FALSE	TRUE
Picolinate levels	Alzheimer's disease	rs72687504	A	G	A	G	0.285391	0.0591008	1.373e-06	-0.0568	0.03	0.0580297	FALSE	TRUE
Picolinate levels	Alzheimer's disease	rs74747434	T	C	T	C	-0.0743448	0.0166538	8.03879e-06	0.007	0.0083	0.3944	FALSE	TRUE
Picolinate levels	Alzheimer's disease	rs77863699	C	T	C	T	0.539266	0.051931	2.92349e-25	-0.0391	0.0268	0.145	FALSE	TRUE
Picolinate levels	Alzheimer's disease	rs9621844	T	C	T	C	-0.0815238	0.0176605	3.90869e-06	0.0229	0.0088	0.00937303	FALSE	TRUE
Picolinate levels	Alzheimer's disease	rs9633689	T	C	T	C	-0.244006	0.0508385	1.5895e-06	0.0064	0.0244	0.7922	FALSE	TRUE
Arachidate (20:0) levels	Alzheimer's disease	rs10014286	C	T	C	T	-0.0914222	0.0204023	7.43017e-06	-0.009	0.0106	0.396	FALSE	TRUE
Arachidate (20:0) levels	Alzheimer's disease	rs10211727	C	T	C	T	-0.180455	0.0370114	1.08448e-06	0.0118	0.0198	0.551099	FALSE	TRUE
Arachidate (20:0) levels	Alzheimer's disease	rs112726409	A	G	A	G	0.0994932	0.0221738	7.224e-06	0.0008	0.0114	0.9454	FALSE	TRUE
Arachidate (20:0) levels	Alzheimer's disease	rs115172531	A	G	A	G	-0.25463	0.0560819	5.61659e-06	-0.0145	0.0296	0.6244	FALSE	TRUE
Arachidate (20:0) levels	Alzheimer's disease	rs117531849	C	A	C	A	0.310913	0.0659517	2.42606e-06	0.0006	0.0367	0.9865	FALSE	TRUE
Arachidate (20:0) levels	Alzheimer's disease	rs11755828	A	G	A	G	-0.131336	0.0290043	5.95034e-06	0.019	0.0157	0.2267	FALSE	TRUE
Arachidate (20:0) levels	Alzheimer's disease	rs141844637	A	C	A	C	0.25111	0.0560387	7.42869e-06	0.0224	0.0296	0.4485	FALSE	TRUE
Arachidate (20:0) levels	Alzheimer's disease	rs143771867	A	G	A	G	-0.197317	0.0428993	4.2344e-06	0.0212	0.0241	0.3788	FALSE	TRUE
Arachidate (20:0) levels	Alzheimer's disease	rs146972161	G	A	G	A	0.497628	0.104643	1.97951e-06	0.01	0.0546	0.8546	FALSE	TRUE
Arachidate (20:0) levels	Alzheimer's disease	rs1736555	G	A	G	A	0.0750494	0.0168498	8.42714e-06	0.0156	0.0089	0.08046	FALSE	TRUE
Arachidate (20:0) levels	Alzheimer's disease	rs2127996	A	G	A	G	-0.088801	0.0199788	8.79868e-06	-0.0053	0.0107	0.6188	FALSE	TRUE
Arachidate (20:0) levels	Alzheimer's disease	rs539511656	A	G	A	G	0.364008	0.0802952	5.80488e-06	0.0669	0.0429	0.1187	FALSE	TRUE
Arachidate (20:0) levels	Alzheimer's disease	rs6754993	A	G	A	G	-0.323133	0.0708985	5.17216e-06	0.0032	0.0373	0.9325	FALSE	TRUE
Arachidate (20:0) levels	Alzheimer's disease	rs72728621	A	C	A	C	-0.108485	0.0216286	5.2818e-07	-0.0176	0.0114	0.123	FALSE	TRUE
Arachidate (20:0) levels	Alzheimer's disease	rs75479618	G	T	G	T	-0.164228	0.0362938	6.04103e-06	0.0198	0.019	0.297	FALSE	TRUE
Arachidate (20:0) levels	Alzheimer's disease	rs75844056	T	G	T	G	0.17317	0.0369008	2.69423e-06	-0.0068	0.0198	0.732799	FALSE	TRUE
Arachidate (20:0) levels	Alzheimer's disease	rs76212203	A	G	A	G	0.203055	0.045209	7.07352e-06	-0.0115	0.0245	0.64	FALSE	TRUE
Arachidate (20:0) levels	Alzheimer's disease	rs7782319	G	A	G	A	-0.0730698	0.0165355	9.91777e-06	0.0104	0.0084	0.2153	FALSE	TRUE
Arachidate (20:0) levels	Alzheimer's disease	rs79812662	A	C	A	C	0.279354	0.0613829	5.33906e-06	0.0241	0.0361	0.5045	FALSE	TRUE
Arachidate (20:0) levels	Alzheimer's disease	rs9862096	G	T	G	T	0.165833	0.0363552	5.07976e-06	0.0243	0.0188	0.1964	FALSE	TRUE
Alpha-ketobutyrate to 3-methyl-2-oxobutyrate ratio	Alzheimer's disease	rs10014755	G	A	G	A	-0.12144	0.0156035	7.09071e-15	-0.0091	0.0082	0.2652	FALSE	TRUE
Alpha-ketobutyrate to 3-methyl-2-oxobutyrate ratio	Alzheimer's disease	rs11142690	G	A	G	A	0.209088	0.0467106	7.59682e-06	0.0217	0.0237	0.3592	FALSE	TRUE
Alpha-ketobutyrate to 3-methyl-2-oxobutyrate ratio	Alzheimer's disease	rs113466620	A	G	A	G	0.218443	0.0488984	7.92152e-06	-0.0366	0.0268	0.1727	FALSE	TRUE
Alpha-ketobutyrate to 3-methyl-2-oxobutyrate ratio	Alzheimer's disease	rs11605120	G	A	G	A	-0.101525	0.0228956	9.23858e-06	0.0009	0.0121	0.943	FALSE	TRUE
Alpha-ketobutyrate to 3-methyl-2-oxobutyrate ratio	Alzheimer's disease	rs117170005	G	A	G	A	0.373063	0.0790896	2.3939e-06	0.0497	0.0391	0.2035	FALSE	TRUE
Alpha-ketobutyrate to 3-methyl-2-oxobutyrate ratio	Alzheimer's disease	rs117578810	A	G	A	G	-0.270825	0.0605821	7.8084e-06	-0.0013	0.0332	0.9677	FALSE	TRUE
Alpha-ketobutyrate to 3-methyl-2-oxobutyrate ratio	Alzheimer's disease	rs13388164	T	C	T	C	-0.406262	0.0898539	6.1441e-06	0.0507	0.0419	0.2266	FALSE	TRUE
Alpha-ketobutyrate to 3-methyl-2-oxobutyrate ratio	Alzheimer's disease	rs142941968	A	G	A	G	0.273449	0.0607113	6.6658e-06	0.0001	0.0319	0.9967	FALSE	TRUE
Alpha-ketobutyrate to 3-methyl-2-oxobutyrate ratio	Alzheimer's disease	rs1638751	G	A	G	A	0.130067	0.0290366	7.48392e-06	0.0269	0.0146	0.0655104	FALSE	TRUE
Alpha-ketobutyrate to 3-methyl-2-oxobutyrate ratio	Alzheimer's disease	rs17385872	A	C	A	C	0.084772	0.0180267	2.56898e-06	-0.0148	0.0093	0.1114	FALSE	TRUE
Alpha-ketobutyrate to 3-methyl-2-oxobutyrate ratio	Alzheimer's disease	rs1811676	G	A	G	A	-0.0993646	0.0223742	8.95296e-06	-0.0054	0.0116	0.6427	FALSE	TRUE
Alpha-ketobutyrate to 3-methyl-2-oxobutyrate ratio	Alzheimer's disease	rs1895645	T	C	T	C	-0.0702403	0.0157659	8.38186e-06	0.0062	0.0082	0.4542	FALSE	TRUE
Alpha-ketobutyrate to 3-methyl-2-oxobutyrate ratio	Alzheimer's disease	rs4736695	G	A	G	A	-0.0880437	0.0170325	2.35135e-07	-0.011	0.0089	0.2174	FALSE	TRUE
Alpha-ketobutyrate to 3-methyl-2-oxobutyrate ratio	Alzheimer's disease	rs563588	A	G	A	G	-0.0699604	0.0157733	9.19147e-06	-0.0014	0.0082	0.8674	FALSE	TRUE
Alpha-ketobutyrate to 3-methyl-2-oxobutyrate ratio	Alzheimer's disease	rs59974919	G	A	G	A	0.195448	0.0382603	3.24939e-07	0.0107	0.0204	0.602101	FALSE	TRUE
Alpha-ketobutyrate to 3-methyl-2-oxobutyrate ratio	Alzheimer's disease	rs71656866	A	G	A	G	0.111376	0.0251958	9.85145e-06	0.0059	0.0134	0.658	FALSE	TRUE
Alpha-ketobutyrate to 3-methyl-2-oxobutyrate ratio	Alzheimer's disease	rs744927	G	A	G	A	0.0928805	0.0204571	5.61829e-06	-0.006	0.0109	0.5802	FALSE	TRUE
Alpha-ketobutyrate to 3-methyl-2-oxobutyrate ratio	Alzheimer's disease	rs8054514	G	T	G	T	-0.102761	0.0224894	4.89304e-06	0.0081	0.0121	0.5005	FALSE	TRUE
3-methylhistidine levels	Alzheimer's disease	rs10014780	G	A	G	A	-0.0956574	0.0209224	4.83094e-06	0.0084	0.0108	0.4342	FALSE	TRUE
3-methylhistidine levels	Alzheimer's disease	rs10966648	T	C	T	C	-0.0937684	0.0178574	1.51321e-07	-0.0177	0.0093	0.0563599	FALSE	TRUE
3-methylhistidine levels	Alzheimer's disease	rs114734560	T	C	T	C	-0.35764	0.076823	3.23383e-06	-0.009	0.0366	0.8056	FALSE	TRUE
3-methylhistidine levels	Alzheimer's disease	rs117090299	C	T	C	T	-0.295449	0.0654447	6.34695e-06	0.0641	0.037	0.0830099	FALSE	TRUE
3-methylhistidine levels	Alzheimer's disease	rs117771460	A	G	A	G	0.264482	0.0597176	9.47246e-06	-0.0165	0.0339	0.6262	FALSE	TRUE
3-methylhistidine levels	Alzheimer's disease	rs11872731	A	G	A	G	0.135492	0.0304621	8.67197e-06	-0.0029	0.0151	0.8474	FALSE	TRUE
3-methylhistidine levels	Alzheimer's disease	rs12138831	T	G	T	G	-0.223214	0.0486608	4.4935e-06	0.01	0.0241	0.6766	FALSE	TRUE
3-methylhistidine levels	Alzheimer's disease	rs12553086	G	T	G	T	0.14967	0.0307172	1.1018e-06	-0.0357	0.0162	0.02776	FALSE	TRUE
3-methylhistidine levels	Alzheimer's disease	rs13234372	A	G	A	G	-0.0821865	0.0166991	8.58358e-07	0.0074	0.0088	0.402	FALSE	TRUE
3-methylhistidine levels	Alzheimer's disease	rs138750865	T	C	T	C	0.229043	0.0483745	2.19298e-06	0.0093	0.0304	0.758799	FALSE	TRUE
3-methylhistidine levels	Alzheimer's disease	rs146846950	A	G	A	G	-0.535769	0.120898	9.35434e-06	-0.0543	0.0542	0.3166	FALSE	TRUE
3-methylhistidine levels	Alzheimer's disease	rs17670800	A	G	A	G	0.0880673	0.0190393	3.73616e-06	0.0089	0.0103	0.3853	FALSE	TRUE
3-methylhistidine levels	Alzheimer's disease	rs185076690	T	C	T	C	0.211694	0.0478147	9.53817e-06	-0.002	0.0275	0.943	FALSE	TRUE
3-methylhistidine levels	Alzheimer's disease	rs1857803	C	T	C	T	-0.0823134	0.017447	2.38263e-06	0.0082	0.0093	0.376	FALSE	TRUE
3-methylhistidine levels	Alzheimer's disease	rs2518573	G	T	G	T	0.0801615	0.017558	4.98237e-06	0.0025	0.0092	0.7831	FALSE	TRUE
3-methylhistidine levels	Alzheimer's disease	rs2797978	C	T	C	T	0.120013	0.0263768	5.36565e-06	-0.006	0.0145	0.6818	FALSE	TRUE
3-methylhistidine levels	Alzheimer's disease	rs4142196	A	C	A	C	-0.0772398	0.0173893	8.92094e-06	-0.0002	0.0093	0.9866	FALSE	TRUE
3-methylhistidine levels	Alzheimer's disease	rs72997812	A	G	A	G	0.0913382	0.0202172	6.24738e-06	-0.0004	0.011	0.9737	FALSE	TRUE
3-methylhistidine levels	Alzheimer's disease	rs73035811	A	G	A	G	0.121144	0.0268809	6.58475e-06	-0.0153	0.0141	0.2781	FALSE	TRUE
3-methylhistidine levels	Alzheimer's disease	rs7516441	A	G	A	G	0.109101	0.0246539	9.63078e-06	0.0133	0.0126	0.2905	FALSE	TRUE
3-methylhistidine levels	Alzheimer's disease	rs752834	A	G	A	G	0.0925549	0.0194528	1.95589e-06	0.0119	0.0101	0.2349	FALSE	TRUE
3-methylhistidine levels	Alzheimer's disease	rs75782963	A	G	A	G	0.209933	0.0472735	8.96138e-06	0.0021	0.0259	0.9339	FALSE	TRUE
3-methylhistidine levels	Alzheimer's disease	rs7746774	G	A	G	A	-0.10469	0.021704	1.41037e-06	-0.0056	0.0115	0.6277	FALSE	TRUE
3-methylhistidine levels	Alzheimer's disease	rs9910668	C	A	C	A	0.0739981	0.0163504	6.01742e-06	-0.0018	0.0088	0.8401	FALSE	TRUE
Creatinine levels	Alzheimer's disease	rs10016457	T	G	T	G	-0.0680842	0.0149836	5.52175e-06	0.0064	0.0093	0.4883	FALSE	TRUE
Creatinine levels	Alzheimer's disease	rs1077697	T	C	T	C	0.0662426	0.0148642	8.33045e-06	-0.003	0.009	0.7391	FALSE	TRUE
Creatinine levels	Alzheimer's disease	rs115523974	T	C	T	C	0.150761	0.0337177	7.77562e-06	-0.0036	0.0204	0.8585	FALSE	TRUE
Creatinine levels	Alzheimer's disease	rs116276675	A	G	A	G	0.244477	0.0549765	8.71073e-06	-0.0707	0.037	0.0557802	FALSE	TRUE
Creatinine levels	Alzheimer's disease	rs117006351	T	C	T	C	-0.235316	0.0525379	7.50003e-06	0.0045	0.031	0.8846	FALSE	TRUE
Creatinine levels	Alzheimer's disease	rs117050209	G	A	G	A	-0.194555	0.0432774	6.93947e-06	0.0169	0.0271	0.5329	FALSE	TRUE
Creatinine levels	Alzheimer's disease	rs117340666	T	C	T	C	-0.288528	0.0627287	4.23266e-06	0.0419	0.0384	0.2754	FALSE	TRUE
Creatinine levels	Alzheimer's disease	rs118162901	G	A	G	A	-0.235754	0.0475743	7.21465e-07	0.0484	0.0303	0.1099	FALSE	TRUE
Creatinine levels	Alzheimer's disease	rs1339135	G	A	G	A	-0.0872322	0.01893	4.06299e-06	0.0073	0.0114	0.5215	FALSE	TRUE
Creatinine levels	Alzheimer's disease	rs138595782	T	C	T	C	0.261484	0.0585173	7.87743e-06	0.057	0.0402	0.1565	FALSE	TRUE
Creatinine levels	Alzheimer's disease	rs140215722	A	C	A	C	0.473565	0.102885	4.16778e-06	0.1176	0.053	0.0263797	FALSE	TRUE
Creatinine levels	Alzheimer's disease	rs142466161	A	G	A	G	-0.326607	0.0738444	9.73853e-06	-0.0097	0.0399	0.8076	FALSE	TRUE
Creatinine levels	Alzheimer's disease	rs144707673	T	C	T	C	-0.389591	0.0856072	5.34131e-06	-0.0055	0.0527	0.9161	FALSE	TRUE
Creatinine levels	Alzheimer's disease	rs144949756	A	C	A	C	0.34176	0.0722693	2.25652e-06	0.0615	0.051	0.2279	FALSE	TRUE
Creatinine levels	Alzheimer's disease	rs1517571	C	A	C	A	-0.077017	0.0172369	7.88966e-06	0.0198	0.0103	0.0550605	FALSE	TRUE
Creatinine levels	Alzheimer's disease	rs2902932	A	G	A	G	0.0722652	0.0155823	3.52374e-06	0.0212	0.0096	0.0267202	FALSE	TRUE
Creatinine levels	Alzheimer's disease	rs555470	C	T	C	T	-0.0892216	0.0194535	4.50966e-06	-0.0062	0.0115	0.5926	FALSE	TRUE
Creatinine levels	Alzheimer's disease	rs6882168	T	C	T	C	-0.0655226	0.0142954	4.57307e-06	-0.0075	0.0088	0.3947	FALSE	TRUE
Creatinine levels	Alzheimer's disease	rs71298304	A	G	A	G	-0.20787	0.0461998	6.81523e-06	0.0191	0.0287	0.5069	FALSE	TRUE
Creatinine levels	Alzheimer's disease	rs7308622	C	T	C	T	-0.0640119	0.0137006	2.97977e-06	0.0033	0.0084	0.691	FALSE	TRUE
Creatinine levels	Alzheimer's disease	rs76171931	G	A	G	A	0.217038	0.0460139	2.39584e-06	0.0046	0.0307	0.8815	FALSE	TRUE
Creatinine levels	Alzheimer's disease	rs76577211	C	T	C	T	-0.347693	0.0772847	6.83167e-06	0.025	0.0468	0.5925	FALSE	TRUE
Creatinine levels	Alzheimer's disease	rs77924615	A	G	A	G	-0.0992923	0.0171397	6.90866e-09	0.0183	0.0105	0.08036	FALSE	TRUE
Glucuronide of C12H22O4 (1) levels	Alzheimer's disease	rs10016748	C	T	C	T	-0.097394	0.0195175	6.03517e-07	0.0001	0.0088	0.9882	FALSE	TRUE
Glucuronide of C12H22O4 (1) levels	Alzheimer's disease	rs10500601	C	T	C	T	-0.0912351	0.0201926	6.23535e-06	-0.0051	0.0088	0.5613	FALSE	TRUE
Glucuronide of C12H22O4 (1) levels	Alzheimer's disease	rs117554227	A	G	A	G	0.192527	0.0432376	8.47755e-06	-0.0345	0.02	0.0850198	FALSE	TRUE
Glucuronide of C12H22O4 (1) levels	Alzheimer's disease	rs117564438	C	T	C	T	-0.376206	0.0847486	9.03427e-06	0.0423	0.0348	0.224	FALSE	TRUE
Glucuronide of C12H22O4 (1) levels	Alzheimer's disease	rs11765210	T	C	T	C	-0.0849659	0.0191533	9.16059e-06	0.0035	0.0084	0.6826	FALSE	TRUE
Glucuronide of C12H22O4 (1) levels	Alzheimer's disease	rs12491981	C	T	C	T	0.17349	0.0316382	4.16876e-08	-0.0064	0.0147	0.6643	FALSE	TRUE
Glucuronide of C12H22O4 (1) levels	Alzheimer's disease	rs12938103	G	A	G	A	0.285347	0.0614467	3.42049e-06	-0.0023	0.0287	0.9353	FALSE	TRUE
Glucuronide of C12H22O4 (1) levels	Alzheimer's disease	rs135068	C	T	C	T	-0.145734	0.0324143	6.92502e-06	-0.0115	0.0145	0.4274	FALSE	TRUE
Glucuronide of C12H22O4 (1) levels	Alzheimer's disease	rs1813918	G	A	G	A	0.0979885	0.0221418	9.62232e-06	-0.0036	0.0101	0.7202	FALSE	TRUE
Glucuronide of C12H22O4 (1) levels	Alzheimer's disease	rs190722836	C	T	C	T	0.490829	0.109053	6.76932e-06	-0.0536	0.0417	0.1985	FALSE	TRUE
Glucuronide of C12H22O4 (1) levels	Alzheimer's disease	rs322566	C	T	C	T	-0.096234	0.0203326	2.21234e-06	0.011	0.009	0.2211	FALSE	TRUE
Glucuronide of C12H22O4 (1) levels	Alzheimer's disease	rs41269797	C	T	C	T	-0.272418	0.0594151	4.53986e-06	-0.0252	0.0275	0.3584	FALSE	TRUE
Glucuronide of C12H22O4 (1) levels	Alzheimer's disease	rs6811622	T	G	T	G	0.0849124	0.0191532	9.27928e-06	-0.0022	0.0085	0.7995	FALSE	TRUE
Glucuronide of C12H22O4 (1) levels	Alzheimer's disease	rs7535988	A	G	A	G	-0.198352	0.0406836	1.08542e-06	0.015	0.0176	0.3952	FALSE	TRUE
Glucuronide of C12H22O4 (1) levels	Alzheimer's disease	rs77128843	G	A	G	A	-0.181555	0.0393386	3.9275e-06	0.0228	0.0195	0.2409	FALSE	TRUE
Glucuronide of C12H22O4 (1) levels	Alzheimer's disease	rs78074146	A	G	A	G	-0.164628	0.0308611	9.58254e-08	0.0092	0.0143	0.5225	FALSE	TRUE
Glucuronide of C12H22O4 (1) levels	Alzheimer's disease	rs926396	A	G	A	G	-0.0850353	0.0186639	5.21019e-06	-0.0162	0.0084	0.05297	FALSE	TRUE
4-vinylphenol sulfate levels	Alzheimer's disease	rs10017190	T	G	T	G	0.0772922	0.0160138	1.38887e-06	0.006	0.0085	0.4812	FALSE	TRUE
4-vinylphenol sulfate levels	Alzheimer's disease	rs116288786	T	C	T	C	0.176295	0.0387919	5.50308e-06	-0.022	0.022	0.319	FALSE	TRUE
4-vinylphenol sulfate levels	Alzheimer's disease	rs12588347	T	C	T	C	0.101799	0.022913	8.87723e-06	-0.0167	0.0127	0.1871	FALSE	TRUE
4-vinylphenol sulfate levels	Alzheimer's disease	rs142547134	G	A	G	A	-0.353111	0.0799296	9.97221e-06	-0.0326	0.04	0.4143	FALSE	TRUE
4-vinylphenol sulfate levels	Alzheimer's disease	rs142694739	T	C	T	C	-0.334733	0.0686365	1.0777e-06	0.0327	0.0321	0.3084	FALSE	TRUE
4-vinylphenol sulfate levels	Alzheimer's disease	rs17221716	G	A	G	A	-0.294615	0.0652211	6.26709e-06	0.0353	0.0337	0.2956	FALSE	TRUE
4-vinylphenol sulfate levels	Alzheimer's disease	rs17806741	A	G	A	G	0.146604	0.0320085	4.64597e-06	0.0175	0.0173	0.3117	FALSE	TRUE
4-vinylphenol sulfate levels	Alzheimer's disease	rs2235878	C	T	C	T	0.0694705	0.0155341	7.74461e-06	0.0062	0.0082	0.447	FALSE	TRUE
4-vinylphenol sulfate levels	Alzheimer's disease	rs6025376	A	G	A	G	0.0877969	0.0181163	1.25796e-06	-0.0134	0.0095	0.1592	FALSE	TRUE
4-vinylphenol sulfate levels	Alzheimer's disease	rs62256120	A	C	A	C	-0.15405	0.0314109	9.3742e-07	0.0078	0.0162	0.631899	FALSE	TRUE
4-vinylphenol sulfate levels	Alzheimer's disease	rs71427503	C	T	C	T	-0.301123	0.0678458	9.06518e-06	-0.0286	0.0396	0.4708	FALSE	TRUE
4-vinylphenol sulfate levels	Alzheimer's disease	rs72712396	C	T	C	T	-0.107914	0.0231415	3.11327e-06	0.0142	0.0121	0.2436	FALSE	TRUE
4-vinylphenol sulfate levels	Alzheimer's disease	rs72799677	C	T	C	T	-0.168498	0.0350702	1.55067e-06	0.0286	0.0182	0.1167	FALSE	TRUE
4-vinylphenol sulfate levels	Alzheimer's disease	rs73918668	G	A	G	A	-0.209198	0.047001	8.54987e-06	0.0001	0.0241	0.9979	FALSE	TRUE
4-vinylphenol sulfate levels	Alzheimer's disease	rs74571463	T	C	T	C	-0.251166	0.0555834	6.2212e-06	-0.0098	0.0294	0.7388	FALSE	TRUE
4-vinylphenol sulfate levels	Alzheimer's disease	rs7664177	T	C	T	C	-0.124619	0.0252657	8.12448e-07	-0.0185	0.0133	0.1634	FALSE	TRUE
4-vinylphenol sulfate levels	Alzheimer's disease	rs78237766	A	G	A	G	-0.198556	0.0352717	1.80908e-08	0.0212	0.0178	0.2317	FALSE	TRUE
4-vinylphenol sulfate levels	Alzheimer's disease	rs8005363	A	G	A	G	0.0831849	0.0184217	6.31399e-06	0.0016	0.0095	0.8664	FALSE	TRUE
4-vinylphenol sulfate levels	Alzheimer's disease	rs890779	C	T	C	T	0.0841902	0.0174052	1.3177e-06	-0.0033	0.009	0.716199	FALSE	TRUE
4-vinylphenol sulfate levels	Alzheimer's disease	rs9566940	T	C	T	C	0.0743306	0.0163416	5.4015e-06	0.0012	0.0086	0.8887	FALSE	TRUE
1-arachidonoyl-GPE (20:4n6) levels	Alzheimer's disease	rs10017259	A	G	A	G	-0.0830187	0.0181421	4.73878e-06	0.0015	0.0097	0.8808	FALSE	TRUE
1-arachidonoyl-GPE (20:4n6) levels	Alzheimer's disease	rs10770795	G	A	G	A	-0.123356	0.0223434	3.37226e-08	0.004	0.0114	0.723099	FALSE	TRUE
1-arachidonoyl-GPE (20:4n6) levels	Alzheimer's disease	rs111411231	T	C	T	C	0.176399	0.0370185	1.88714e-06	-0.002	0.0205	0.9209	FALSE	TRUE
1-arachidonoyl-GPE (20:4n6) levels	Alzheimer's disease	rs11519272	A	C	A	C	0.271602	0.0203388	1.12462e-40	0.0157	0.011	0.1547	FALSE	TRUE
1-arachidonoyl-GPE (20:4n6) levels	Alzheimer's disease	rs144392547	G	T	G	T	0.333736	0.0743901	7.24706e-06	-0.0007	0.0391	0.9856	FALSE	TRUE
1-arachidonoyl-GPE (20:4n6) levels	Alzheimer's disease	rs1532085	G	A	G	A	-0.104314	0.0159064	5.45555e-11	0.0331	0.0083	6.88193e-05	FALSE	TRUE
1-arachidonoyl-GPE (20:4n6) levels	Alzheimer's disease	rs17008864	C	T	C	T	-0.136333	0.026888	3.97e-07	-0.0198	0.0141	0.1598	FALSE	TRUE
1-arachidonoyl-GPE (20:4n6) levels	Alzheimer's disease	rs17113588	A	G	A	G	-0.149467	0.0285328	1.61935e-07	0.0087	0.0153	0.5696	FALSE	TRUE
1-arachidonoyl-GPE (20:4n6) levels	Alzheimer's disease	rs174560	C	T	C	T	-0.384949	0.0161464	1.25235e-125	-0.0031	0.0088	0.726901	FALSE	TRUE
1-arachidonoyl-GPE (20:4n6) levels	Alzheimer's disease	rs1800588	T	C	T	C	0.0989176	0.0188023	1.43321e-07	0.022	0.0098	0.02536	FALSE	TRUE
1-arachidonoyl-GPE (20:4n6) levels	Alzheimer's disease	rs186419492	A	G	A	G	-0.360176	0.0762319	2.30399e-06	0.0062	0.043	0.8851	FALSE	TRUE
1-arachidonoyl-GPE (20:4n6) levels	Alzheimer's disease	rs191108426	C	A	C	A	0.358869	0.0792958	6.01966e-06	-0.0589	0.0379	0.1202	FALSE	TRUE
1-arachidonoyl-GPE (20:4n6) levels	Alzheimer's disease	rs2093777	C	T	C	T	0.0694136	0.0154991	7.51504e-06	-0.0087	0.0083	0.2947	FALSE	TRUE
1-arachidonoyl-GPE (20:4n6) levels	Alzheimer's disease	rs2243884	C	T	C	T	-0.0849616	0.0181134	2.72473e-06	0.0046	0.0094	0.623199	FALSE	TRUE
1-arachidonoyl-GPE (20:4n6) levels	Alzheimer's disease	rs262145	G	T	G	T	-0.0783967	0.0170875	4.47626e-06	-0.0127	0.009	0.1546	FALSE	TRUE
1-arachidonoyl-GPE (20:4n6) levels	Alzheimer's disease	rs2980882	G	A	G	A	-0.0822252	0.0153516	8.50248e-08	0.0002	0.0081	0.9814	FALSE	TRUE
1-arachidonoyl-GPE (20:4n6) levels	Alzheimer's disease	rs34813941	T	C	T	C	-0.187655	0.0423818	9.52328e-06	0.019	0.0235	0.4187	FALSE	TRUE
1-arachidonoyl-GPE (20:4n6) levels	Alzheimer's disease	rs3851665	A	G	A	G	0.0814589	0.0182291	7.87227e-06	0.0269	0.0096	0.00506396	FALSE	TRUE
1-arachidonoyl-GPE (20:4n6) levels	Alzheimer's disease	rs55837305	A	G	A	G	-0.154979	0.0334877	3.6931e-06	0.0091	0.019	0.633501	FALSE	TRUE
1-arachidonoyl-GPE (20:4n6) levels	Alzheimer's disease	rs56099367	C	T	C	T	-0.129794	0.0291473	8.46629e-06	-0.007	0.0153	0.6477	FALSE	TRUE
1-arachidonoyl-GPE (20:4n6) levels	Alzheimer's disease	rs6736301	A	G	A	G	-0.280685	0.0615347	5.08094e-06	0.0064	0.0287	0.8248	FALSE	TRUE
1-arachidonoyl-GPE (20:4n6) levels	Alzheimer's disease	rs68175566	T	G	T	G	0.0914147	0.0206951	9.99774e-06	0.0205	0.0111	0.0654998	FALSE	TRUE
1-arachidonoyl-GPE (20:4n6) levels	Alzheimer's disease	rs6994059	A	C	A	C	-0.0813717	0.0180307	6.39301e-06	-0.0268	0.0091	0.00334403	FALSE	TRUE
1-arachidonoyl-GPE (20:4n6) levels	Alzheimer's disease	rs7253806	C	T	C	T	0.190452	0.0425557	7.62865e-06	-0.0007	0.0244	0.9781	FALSE	TRUE
1-arachidonoyl-GPE (20:4n6) levels	Alzheimer's disease	rs73218916	G	A	G	A	0.229632	0.0494845	3.47606e-06	-0.0328	0.0265	0.2153	FALSE	TRUE
1-arachidonoyl-GPE (20:4n6) levels	Alzheimer's disease	rs76818325	A	G	A	G	0.122694	0.0273352	7.17197e-06	-0.0141	0.0146	0.3332	FALSE	TRUE
1-arachidonoyl-GPE (20:4n6) levels	Alzheimer's disease	rs78883782	C	T	C	T	0.416436	0.0878548	2.1367e-06	0.0673	0.0459	0.142	FALSE	TRUE
1-arachidonoyl-GPE (20:4n6) levels	Alzheimer's disease	rs80318161	T	C	T	C	0.251687	0.0540826	3.25932e-06	-0.0308	0.0305	0.3131	FALSE	TRUE
1-arachidonoyl-GPE (20:4n6) levels	Alzheimer's disease	rs907035	A	G	A	G	-0.0799857	0.0156033	2.95643e-07	0.0081	0.0083	0.3292	FALSE	TRUE
1-arachidonoyl-GPE (20:4n6) levels	Alzheimer's disease	rs9909922	C	T	C	T	0.117923	0.0244811	1.4579e-06	-0.0077	0.0126	0.5427	FALSE	TRUE
X-11483 levels	Alzheimer's disease	rs10018182	G	T	G	T	-0.0741575	0.0160715	3.94559e-06	-0.0086	0.0082	0.293	FALSE	TRUE
X-11483 levels	Alzheimer's disease	rs10947493	C	T	C	T	0.12301	0.0254767	1.37675e-06	-0.03	0.013	0.0209002	FALSE	TRUE
X-11483 levels	Alzheimer's disease	rs111883187	G	A	G	A	0.280829	0.060172	3.05477e-06	0.0175	0.0321	0.586001	FALSE	TRUE
X-11483 levels	Alzheimer's disease	rs112799949	G	A	G	A	0.444164	0.0980074	5.84421e-06	-0.044	0.043	0.3062	FALSE	TRUE
X-11483 levels	Alzheimer's disease	rs114653027	A	G	A	G	-0.295621	0.0604787	1.01856e-06	-0.0049	0.0363	0.8921	FALSE	TRUE
X-11483 levels	Alzheimer's disease	rs115895510	T	C	T	C	-0.457587	0.0886775	2.46779e-07	0.0163	0.0385	0.6724	FALSE	TRUE
X-11483 levels	Alzheimer's disease	rs116052463	T	C	T	C	-0.267832	0.0594599	6.6558e-06	-0.0362	0.0292	0.2145	FALSE	TRUE
X-11483 levels	Alzheimer's disease	rs117685732	T	C	T	C	-0.30039	0.067874	9.6127e-06	-0.0378	0.0349	0.2782	FALSE	TRUE
X-11483 levels	Alzheimer's disease	rs12201648	C	T	C	T	0.0748239	0.0168856	9.37019e-06	-0.0034	0.0086	0.6892	FALSE	TRUE
X-11483 levels	Alzheimer's disease	rs12527410	C	T	C	T	0.0804474	0.0176739	5.31989e-06	-0.004	0.0093	0.6631	FALSE	TRUE
X-11483 levels	Alzheimer's disease	rs147357603	A	G	A	G	-0.238985	0.0486481	8.99109e-07	-0.0138	0.0249	0.579399	FALSE	TRUE
X-11483 levels	Alzheimer's disease	rs148659822	C	A	C	A	0.254463	0.0540647	2.51844e-06	-0.0052	0.0261	0.8407	FALSE	TRUE
X-11483 levels	Alzheimer's disease	rs193284362	C	T	C	T	-0.300782	0.0669585	7.0535e-06	0.0686	0.0368	0.0619598	FALSE	TRUE
X-11483 levels	Alzheimer's disease	rs2028403	C	A	C	A	0.0818337	0.0177008	3.77948e-06	0.0004	0.0091	0.9674	FALSE	TRUE
X-11483 levels	Alzheimer's disease	rs34623898	T	G	T	G	0.219197	0.046172	2.0604e-06	0.0211	0.0253	0.4057	FALSE	TRUE
X-11483 levels	Alzheimer's disease	rs35929027	T	C	T	C	-0.151537	0.0304504	6.47415e-07	0.0011	0.0162	0.9476	FALSE	TRUE
X-11483 levels	Alzheimer's disease	rs3753782	G	A	G	A	-0.0996258	0.0221661	6.97323e-06	0.0197	0.0113	0.0806901	FALSE	TRUE
X-11483 levels	Alzheimer's disease	rs6018515	A	G	A	G	-0.135415	0.0288104	2.59914e-06	-0.0101	0.0147	0.492	FALSE	TRUE
X-11483 levels	Alzheimer's disease	rs7519138	A	G	A	G	-0.0774981	0.0171076	5.89721e-06	0.0015	0.0089	0.8655	FALSE	TRUE
X-11483 levels	Alzheimer's disease	rs7797147	G	A	G	A	0.0834734	0.0170705	1.00877e-06	-0.017	0.0088	0.0516702	FALSE	TRUE
X-11483 levels	Alzheimer's disease	rs78180636	C	T	C	T	-0.392341	0.0841963	3.16465e-06	0.0158	0.0451	0.726901	FALSE	TRUE
X-11483 levels	Alzheimer's disease	rs78427731	T	C	T	C	-0.222893	0.0488095	4.95726e-06	-0.006	0.0245	0.8056	FALSE	TRUE
X-11483 levels	Alzheimer's disease	rs9319915	G	A	G	A	0.425574	0.0949004	7.31108e-06	-0.0255	0.0438	0.5597	FALSE	TRUE
X-11483 levels	Alzheimer's disease	rs9922808	C	T	C	T	-0.083568	0.0161635	2.3389e-07	-0.0066	0.0084	0.437	FALSE	TRUE
Alpha-hydroxyisovalerate levels	Alzheimer's disease	rs10018448	G	A	G	A	0.0938716	0.0148331	2.47555e-10	-0.0109	0.0082	0.1828	FALSE	TRUE
Alpha-hydroxyisovalerate levels	Alzheimer's disease	rs112297849	G	A	G	A	0.325275	0.0734959	9.61022e-06	0.0323	0.0379	0.3948	FALSE	TRUE
Alpha-hydroxyisovalerate levels	Alzheimer's disease	rs117055304	C	T	C	T	0.221934	0.0473891	2.82399e-06	-0.0171	0.0269	0.526	FALSE	TRUE
Alpha-hydroxyisovalerate levels	Alzheimer's disease	rs165107	T	G	T	G	-0.101703	0.0211423	1.50612e-06	0.0202	0.0118	0.086139	FALSE	TRUE
Alpha-hydroxyisovalerate levels	Alzheimer's disease	rs186454994	T	C	T	C	0.313174	0.0666298	2.59899e-06	0.0276	0.0394	0.4832	FALSE	TRUE
Alpha-hydroxyisovalerate levels	Alzheimer's disease	rs1891761	G	A	G	A	-0.072877	0.0148792	9.68673e-07	-0.0068	0.0082	0.4033	FALSE	TRUE
Alpha-hydroxyisovalerate levels	Alzheimer's disease	rs2393791	T	C	T	C	-0.116179	0.0152288	2.36823e-14	0.0122	0.0083	0.1412	FALSE	TRUE
Alpha-hydroxyisovalerate levels	Alzheimer's disease	rs3802967	C	T	C	T	-0.258766	0.01431	4.3483e-73	0.0224	0.0082	0.00604505	FALSE	TRUE
Alpha-hydroxyisovalerate levels	Alzheimer's disease	rs541290556	T	C	T	C	-0.242104	0.0547816	9.89578e-06	0.0385	0.0335	0.2496	FALSE	TRUE
Alpha-hydroxyisovalerate levels	Alzheimer's disease	rs555068032	T	C	T	C	0.537911	0.106578	4.48512e-07	-0.0152	0.0524	0.7716	FALSE	TRUE
Alpha-hydroxyisovalerate levels	Alzheimer's disease	rs6085741	A	C	A	C	0.104775	0.0194422	7.08271e-08	-0.0002	0.0106	0.9824	FALSE	TRUE
Alpha-hydroxyisovalerate levels	Alzheimer's disease	rs655558	T	C	T	C	-0.0694983	0.0152585	5.24565e-06	-0.0065	0.0085	0.4429	FALSE	TRUE
Alpha-hydroxyisovalerate levels	Alzheimer's disease	rs7236320	A	G	A	G	-0.0820926	0.0176835	3.44513e-06	-0.0198	0.01	0.0473598	FALSE	TRUE
Alpha-hydroxyisovalerate levels	Alzheimer's disease	rs76197763	G	A	G	A	-0.177832	0.0397619	7.73357e-06	0.0642	0.0225	0.00438995	FALSE	TRUE
Alpha-hydroxyisovalerate levels	Alzheimer's disease	rs950950	T	C	T	C	0.0691002	0.0146353	2.34153e-06	-0.0033	0.0082	0.6857	FALSE	TRUE
N-acetyltaurine levels	Alzheimer's disease	rs117241561	A	G	A	G	0.229944	0.0470377	1.01599e-06	-0.0173	0.0269	0.5201	FALSE	TRUE
N-acetyltaurine levels	Alzheimer's disease	rs118058149	C	T	C	T	-0.25194	0.0536379	2.63934e-06	0.0239	0.0318	0.4509	FALSE	TRUE
N-acetyltaurine levels	Alzheimer's disease	rs12977772	T	G	T	G	-0.087785	0.0184632	1.98855e-06	-0.0015	0.0112	0.8896	FALSE	TRUE
N-acetyltaurine levels	Alzheimer's disease	rs139747290	A	G	A	G	0.279391	0.0631094	9.55135e-06	-0.0039	0.0402	0.9222	FALSE	TRUE
N-acetyltaurine levels	Alzheimer's disease	rs142302535	G	T	G	T	-0.46071	0.0944591	1.07524e-06	-0.0408	0.0579	0.4814	FALSE	TRUE
N-acetyltaurine levels	Alzheimer's disease	rs143013804	A	G	A	G	0.258774	0.0582397	8.86065e-06	0.0278	0.0327	0.3954	FALSE	TRUE
N-acetyltaurine levels	Alzheimer's disease	rs200354496	G	A	G	A	0.0817742	0.0178014	4.3549e-06	0.001	0.0101	0.9222	FALSE	TRUE
N-acetyltaurine levels	Alzheimer's disease	rs2388417	T	C	T	C	0.257226	0.0572501	7.02211e-06	-0.0608	0.0332	0.0670502	FALSE	TRUE
N-acetyltaurine levels	Alzheimer's disease	rs373188	T	G	T	G	0.0749647	0.0147908	4.01352e-07	-0.0101	0.0083	0.2253	FALSE	TRUE
N-acetyltaurine levels	Alzheimer's disease	rs4986782	A	G	A	G	-0.421347	0.0529724	1.80436e-15	-0.0337	0.0289	0.2434	FALSE	TRUE
N-acetyltaurine levels	Alzheimer's disease	rs56213137	G	A	G	A	0.0744547	0.0162768	4.77866e-06	0.0032	0.0093	0.728501	FALSE	TRUE
N-acetyltaurine levels	Alzheimer's disease	rs6602129	G	A	G	A	-0.309459	0.0259822	1.04455e-32	0.0232	0.0148	0.1171	FALSE	TRUE
N-acetyltaurine levels	Alzheimer's disease	rs73850513	T	C	T	C	-0.105669	0.0229428	4.10995e-06	0.0082	0.0132	0.5359	FALSE	TRUE
N-acetyltaurine levels	Alzheimer's disease	rs74816231	C	T	C	T	0.120468	0.0266688	6.26657e-06	0.0154	0.0151	0.3086	FALSE	TRUE
N-acetyltaurine levels	Alzheimer's disease	rs7566439	G	A	G	A	-0.0668101	0.0149898	8.30982e-06	-0.0117	0.0085	0.165	FALSE	TRUE
N-acetyltaurine levels	Alzheimer's disease	rs7654754	A	G	A	G	0.0651067	0.0143582	5.77533e-06	0.0095	0.0082	0.2448	FALSE	TRUE
N-acetyltaurine levels	Alzheimer's disease	rs77338333	C	A	C	A	0.286574	0.0564118	3.77382e-07	0.0137	0.0289	0.6354	FALSE	TRUE
N-acetyltaurine levels	Alzheimer's disease	rs77924615	A	G	A	G	-0.0958902	0.0185167	2.23575e-07	0.0183	0.0105	0.08036	FALSE	TRUE
N-acetyltaurine levels	Alzheimer's disease	rs897109	A	C	A	C	0.070807	0.0156606	6.14499e-06	-0.0079	0.0088	0.3672	FALSE	TRUE
N,N,N-trimethyl-5-aminovalerate levels	Alzheimer's disease	rs10019927	A	G	A	G	0.100043	0.0210306	1.96494e-06	0.0001	0.0119	0.9946	FALSE	TRUE
N,N,N-trimethyl-5-aminovalerate levels	Alzheimer's disease	rs112201728	T	C	T	C	0.176096	0.0294943	2.36518e-09	-0.0385	0.0161	0.0166001	FALSE	TRUE
N,N,N-trimethyl-5-aminovalerate levels	Alzheimer's disease	rs11239528	G	A	G	A	-0.114304	0.0173178	4.10109e-11	0.0071	0.0094	0.4508	FALSE	TRUE
N,N,N-trimethyl-5-aminovalerate levels	Alzheimer's disease	rs114092500	G	A	G	A	-0.193598	0.0414598	3.01869e-06	-0.0091	0.0229	0.690601	FALSE	TRUE
N,N,N-trimethyl-5-aminovalerate levels	Alzheimer's disease	rs115855008	C	A	C	A	-0.258933	0.0489327	1.21244e-07	0.0524	0.0271	0.05313	FALSE	TRUE
N,N,N-trimethyl-5-aminovalerate levels	Alzheimer's disease	rs116741547	T	C	T	C	0.0946568	0.020584	4.2544e-06	-0.0087	0.011	0.4319	FALSE	TRUE
N,N,N-trimethyl-5-aminovalerate levels	Alzheimer's disease	rs117505483	G	A	G	A	0.229571	0.0493895	3.34884e-06	0.0317	0.0262	0.2262	FALSE	TRUE
N,N,N-trimethyl-5-aminovalerate levels	Alzheimer's disease	rs11871125	T	C	T	C	0.113223	0.0154553	2.37406e-13	0.0093	0.0084	0.2713	FALSE	TRUE
N,N,N-trimethyl-5-aminovalerate levels	Alzheimer's disease	rs12433003	C	T	C	T	0.0963563	0.0207746	3.51485e-06	-0.0011	0.0111	0.9201	FALSE	TRUE
N,N,N-trimethyl-5-aminovalerate levels	Alzheimer's disease	rs12895751	A	G	A	G	0.0810172	0.0177748	5.16455e-06	0.028	0.0096	0.003491	FALSE	TRUE
N,N,N-trimethyl-5-aminovalerate levels	Alzheimer's disease	rs13124155	T	G	T	G	-0.0688793	0.014973	4.2202e-06	0.0073	0.0082	0.3775	FALSE	TRUE
N,N,N-trimethyl-5-aminovalerate levels	Alzheimer's disease	rs13336225	G	A	G	A	0.0755964	0.016948	8.1771e-06	-0.0204	0.0091	0.0254097	FALSE	TRUE
N,N,N-trimethyl-5-aminovalerate levels	Alzheimer's disease	rs13357247	T	C	T	C	-0.239564	0.0345332	3.99947e-12	0.0396	0.0178	0.0259801	FALSE	TRUE
N,N,N-trimethyl-5-aminovalerate levels	Alzheimer's disease	rs133839	T	C	T	C	-0.1961	0.0425881	4.13332e-06	-0.0345	0.0241	0.1511	FALSE	TRUE
N,N,N-trimethyl-5-aminovalerate levels	Alzheimer's disease	rs139673448	C	A	C	A	-0.26466	0.0569188	3.32292e-06	-0.0062	0.0314	0.8428	FALSE	TRUE
N,N,N-trimethyl-5-aminovalerate levels	Alzheimer's disease	rs17576821	A	G	A	G	0.12353	0.0273894	6.47896e-06	-0.0224	0.0145	0.1215	FALSE	TRUE
N,N,N-trimethyl-5-aminovalerate levels	Alzheimer's disease	rs192570103	G	T	G	T	0.145278	0.0320302	5.74218e-06	0.0407	0.0173	0.0183899	FALSE	TRUE
N,N,N-trimethyl-5-aminovalerate levels	Alzheimer's disease	rs258332	A	G	A	G	-0.0821948	0.0151052	5.28368e-08	0.017	0.0082	0.0383204	FALSE	TRUE
N,N,N-trimethyl-5-aminovalerate levels	Alzheimer's disease	rs272857	A	G	A	G	-0.17937	0.0153843	2.05705e-31	-0.0061	0.0083	0.4668	FALSE	TRUE
N,N,N-trimethyl-5-aminovalerate levels	Alzheimer's disease	rs35652985	C	T	C	T	0.153702	0.0293142	1.57756e-07	-0.0168	0.0155	0.2786	FALSE	TRUE
N,N,N-trimethyl-5-aminovalerate levels	Alzheimer's disease	rs530572750	T	G	T	G	-0.316968	0.0675827	2.73112e-06	0.0569	0.0366	0.1196	FALSE	TRUE
N,N,N-trimethyl-5-aminovalerate levels	Alzheimer's disease	rs56012365	A	G	A	G	0.129504	0.0272939	2.08716e-06	0.0466	0.0167	0.005431	FALSE	TRUE
N,N,N-trimethyl-5-aminovalerate levels	Alzheimer's disease	rs62133969	G	A	G	A	0.0774613	0.0171578	6.34236e-06	-0.0212	0.0093	0.02173	FALSE	TRUE
N,N,N-trimethyl-5-aminovalerate levels	Alzheimer's disease	rs72654913	C	T	C	T	0.181651	0.0371589	1.0161e-06	0.0005	0.0193	0.9787	FALSE	TRUE
N,N,N-trimethyl-5-aminovalerate levels	Alzheimer's disease	rs72696919	A	C	A	C	0.0696916	0.0154659	6.60193e-06	0.0043	0.0083	0.608199	FALSE	TRUE
N,N,N-trimethyl-5-aminovalerate levels	Alzheimer's disease	rs75041978	T	C	T	C	-0.226941	0.0489015	3.47111e-06	0.0037	0.0249	0.8823	FALSE	TRUE
N,N,N-trimethyl-5-aminovalerate levels	Alzheimer's disease	rs75441519	A	G	A	G	0.120329	0.0248063	1.22999e-06	0.0008	0.0132	0.9496	FALSE	TRUE
N,N,N-trimethyl-5-aminovalerate levels	Alzheimer's disease	rs76127293	A	G	A	G	-0.210826	0.0475864	9.40652e-06	0.0134	0.0265	0.611799	FALSE	TRUE
N,N,N-trimethyl-5-aminovalerate levels	Alzheimer's disease	rs77656158	G	A	G	A	-0.0959017	0.0213212	6.86093e-06	0.0092	0.0116	0.4299	FALSE	TRUE
N,N,N-trimethyl-5-aminovalerate levels	Alzheimer's disease	rs8033451	C	A	C	A	-0.150825	0.0334711	6.60179e-06	-0.0221	0.0181	0.2216	FALSE	TRUE
N,N,N-trimethyl-5-aminovalerate levels	Alzheimer's disease	rs8191944	T	C	T	C	-0.431454	0.0976197	9.88162e-06	0.0178	0.051	0.7263	FALSE	TRUE
N,N,N-trimethyl-5-aminovalerate levels	Alzheimer's disease	rs9382940	T	C	T	C	0.114421	0.0206573	3.04241e-08	0.0098	0.0109	0.3664	FALSE	TRUE
Erythronate levels	Alzheimer's disease	rs10020341	G	A	G	A	-0.228497	0.0511735	8.00122e-06	-0.0011	0.0294	0.9694	FALSE	TRUE
Erythronate levels	Alzheimer's disease	rs10029860	A	C	A	C	0.0771329	0.0139792	3.43499e-08	0.0096	0.0082	0.239	FALSE	TRUE
Erythronate levels	Alzheimer's disease	rs1077697	T	C	T	C	0.0860267	0.0156007	3.50183e-08	-0.003	0.009	0.7391	FALSE	TRUE
Erythronate levels	Alzheimer's disease	rs114262076	A	G	A	G	0.394325	0.0737304	8.88352e-08	-0.0534	0.0479	0.2655	FALSE	TRUE
Erythronate levels	Alzheimer's disease	rs12633047	T	C	T	C	0.191796	0.0272697	2.01719e-12	0.0014	0.0167	0.9348	FALSE	TRUE
Erythronate levels	Alzheimer's disease	rs13166782	C	T	C	T	-0.0677204	0.0150125	6.45418e-06	0.0166	0.0087	0.0581005	FALSE	TRUE
Erythronate levels	Alzheimer's disease	rs13192355	C	T	C	T	-0.0723656	0.0151053	1.66174e-06	0.0044	0.0089	0.625	FALSE	TRUE
Erythronate levels	Alzheimer's disease	rs146001245	A	G	A	G	0.103566	0.0223638	3.64018e-06	0.0155	0.0129	0.2281	FALSE	TRUE
Erythronate levels	Alzheimer's disease	rs1466648	G	A	G	A	0.0685761	0.0151611	6.09263e-06	-0.0061	0.0088	0.4901	FALSE	TRUE
Erythronate levels	Alzheimer's disease	rs2555059	A	G	A	G	-0.0836953	0.0177347	2.36653e-06	-0.0201	0.0101	0.0477002	FALSE	TRUE
Erythronate levels	Alzheimer's disease	rs34105328	T	C	T	C	-0.292822	0.0645235	5.67313e-06	0.0312	0.0375	0.4058	FALSE	TRUE
Erythronate levels	Alzheimer's disease	rs62390644	T	C	T	C	-0.0818578	0.0181213	6.26613e-06	0.0026	0.0106	0.8048	FALSE	TRUE
Erythronate levels	Alzheimer's disease	rs7203642	G	A	G	A	-0.0961198	0.0178328	7.04309e-08	0.0204	0.0102	0.0461403	FALSE	TRUE
Erythronate levels	Alzheimer's disease	rs73840299	T	C	T	C	-0.207994	0.0211326	7.39613e-23	-0.0288	0.0123	0.0193299	FALSE	TRUE
Erythronate levels	Alzheimer's disease	rs75562012	G	T	G	T	0.254551	0.0566644	7.04711e-06	0.0121	0.0362	0.737901	FALSE	TRUE
Erythronate levels	Alzheimer's disease	rs7635991	C	T	C	T	0.0885241	0.0169715	1.82771e-07	0.001	0.0104	0.9235	FALSE	TRUE
Androsterone sulfate levels	Alzheimer's disease	rs10020631	A	G	A	G	-0.178664	0.0173416	6.85239e-25	-0.0027	0.0099	0.783401	FALSE	TRUE
Androsterone sulfate levels	Alzheimer's disease	rs10185931	G	A	G	A	0.126738	0.0283477	7.79137e-06	-0.0161	0.0156	0.3003	FALSE	TRUE
Androsterone sulfate levels	Alzheimer's disease	rs10212881	A	C	A	C	0.162205	0.0366696	9.71449e-06	0.0098	0.0196	0.617401	FALSE	TRUE
Androsterone sulfate levels	Alzheimer's disease	rs10275052	A	G	A	G	0.0810352	0.0161535	5.26036e-07	-0.0495	0.009	3.30301e-08	FALSE	TRUE
Androsterone sulfate levels	Alzheimer's disease	rs10974471	T	G	T	G	0.0941479	0.0210806	7.96608e-06	0.0024	0.0119	0.8435	FALSE	TRUE
Androsterone sulfate levels	Alzheimer's disease	rs114483936	A	G	A	G	0.259924	0.0573079	5.74491e-06	0.0441	0.0331	0.1832	FALSE	TRUE
Androsterone sulfate levels	Alzheimer's disease	rs11519272	A	C	A	C	0.0965537	0.0197203	9.77228e-07	0.0157	0.011	0.1547	FALSE	TRUE
Androsterone sulfate levels	Alzheimer's disease	rs115775486	C	T	C	T	-0.307541	0.0688543	7.94914e-06	-0.0453	0.0336	0.1779	FALSE	TRUE
Androsterone sulfate levels	Alzheimer's disease	rs1165148	T	G	T	G	0.0861899	0.017202	5.42984e-07	-0.0009	0.0094	0.9195	FALSE	TRUE
Androsterone sulfate levels	Alzheimer's disease	rs117209214	A	G	A	G	-0.75229	0.085224	1.07326e-18	0.0272	0.0498	0.585301	FALSE	TRUE
Androsterone sulfate levels	Alzheimer's disease	rs12549641	G	A	G	A	-0.068744	0.0153009	7.02876e-06	-0.0087	0.0082	0.2928	FALSE	TRUE
Androsterone sulfate levels	Alzheimer's disease	rs1260326	C	T	C	T	-0.076063	0.0150807	4.56559e-07	-0.0183	0.0082	0.0258	FALSE	TRUE
Androsterone sulfate levels	Alzheimer's disease	rs12768534	A	G	A	G	-0.0680564	0.0147742	4.09637e-06	0.022	0.0081	0.00683298	FALSE	TRUE
Androsterone sulfate levels	Alzheimer's disease	rs138820751	T	C	T	C	-0.171607	0.0375908	4.99199e-06	0.015	0.0213	0.4822	FALSE	TRUE
Androsterone sulfate levels	Alzheimer's disease	rs139237479	A	G	A	G	-0.567581	0.124536	5.17497e-06	0.0606	0.0586	0.3005	FALSE	TRUE
Androsterone sulfate levels	Alzheimer's disease	rs140628452	T	C	T	C	-0.278762	0.058668	2.01898e-06	0.0149	0.0338	0.6582	FALSE	TRUE
Androsterone sulfate levels	Alzheimer's disease	rs148982377	C	T	C	T	-1.50358	0.038262	1e-200	0.0441	0.0203	0.0301599	FALSE	TRUE
Androsterone sulfate levels	Alzheimer's disease	rs17834682	T	C	T	C	0.197236	0.039539	6.08818e-07	-0.0129	0.0215	0.549099	FALSE	TRUE
Androsterone sulfate levels	Alzheimer's disease	rs34445681	C	A	C	A	-0.218871	0.044592	9.18702e-07	-0.0061	0.0245	0.8034	FALSE	TRUE
Androsterone sulfate levels	Alzheimer's disease	rs4246147	G	A	G	A	-0.0719284	0.0154217	3.09979e-06	-0.0049	0.0086	0.5699	FALSE	TRUE
Androsterone sulfate levels	Alzheimer's disease	rs56225736	A	G	A	G	0.138611	0.0214654	1.06497e-10	-0.0343	0.0119	0.004023	FALSE	TRUE
Androsterone sulfate levels	Alzheimer's disease	rs61939335	A	C	A	C	0.172215	0.0359097	1.62042e-06	-0.0195	0.0208	0.3474	FALSE	TRUE
Androsterone sulfate levels	Alzheimer's disease	rs62128827	T	C	T	C	-0.131302	0.0202782	9.48045e-11	-0.0237	0.012	0.0483404	FALSE	TRUE
Androsterone sulfate levels	Alzheimer's disease	rs7116362	T	C	T	C	-0.166269	0.0369342	6.73941e-06	-0.0153	0.0209	0.4647	FALSE	TRUE
Androsterone sulfate levels	Alzheimer's disease	rs72790679	A	G	A	G	-0.291538	0.0563141	2.25483e-07	0.0359	0.0332	0.2802	FALSE	TRUE
Androsterone sulfate levels	Alzheimer's disease	rs75208241	T	C	T	C	-0.254381	0.0553125	4.24557e-06	0.007	0.0295	0.8134	FALSE	TRUE
Androsterone sulfate levels	Alzheimer's disease	rs76136208	T	C	T	C	-0.331696	0.0712082	3.19124e-06	-0.0555	0.0374	0.1381	FALSE	TRUE
Androsterone sulfate levels	Alzheimer's disease	rs76205362	C	T	C	T	-0.218954	0.0486958	6.91253e-06	0.0001	0.0253	0.9967	FALSE	TRUE
Androsterone sulfate levels	Alzheimer's disease	rs77670276	G	A	G	A	-0.0932627	0.0210958	9.82888e-06	-0.0129	0.0116	0.2669	FALSE	TRUE
Androsterone sulfate levels	Alzheimer's disease	rs77721309	T	C	T	C	0.335063	0.0756961	9.58104e-06	0.0547	0.0394	0.1657	FALSE	TRUE
Androsterone sulfate levels	Alzheimer's disease	rs8008584	C	T	C	T	0.0683946	0.0153764	8.66678e-06	0.0033	0.0083	0.6886	FALSE	TRUE
Androsterone sulfate levels	Alzheimer's disease	rs80344133	A	C	A	C	-0.08387	0.0187147	7.41226e-06	-0.0154	0.0102	0.1299	FALSE	TRUE
Cis-4-decenoate (10:1n6) levels	Alzheimer's disease	rs10102352	G	A	G	A	0.0710221	0.0156466	5.6483e-06	-0.0049	0.0083	0.5603	FALSE	TRUE
Cis-4-decenoate (10:1n6) levels	Alzheimer's disease	rs11205002	G	T	G	T	-0.080969	0.0160915	4.859e-07	0.0018	0.0086	0.8307	FALSE	TRUE
Cis-4-decenoate (10:1n6) levels	Alzheimer's disease	rs112085223	C	A	C	A	0.160282	0.0353666	5.84263e-06	0.0154	0.019	0.4193	FALSE	TRUE
Cis-4-decenoate (10:1n6) levels	Alzheimer's disease	rs117734990	C	T	C	T	-0.218996	0.0492138	8.59153e-06	0.0002	0.0269	0.9943	FALSE	TRUE
Cis-4-decenoate (10:1n6) levels	Alzheimer's disease	rs12445598	T	C	T	C	-0.0737181	0.0164902	7.80633e-06	0.0077	0.0089	0.3847	FALSE	TRUE
Cis-4-decenoate (10:1n6) levels	Alzheimer's disease	rs138999278	T	C	T	C	0.239529	0.045975	1.88846e-07	-0.0295	0.0253	0.2445	FALSE	TRUE
Cis-4-decenoate (10:1n6) levels	Alzheimer's disease	rs1418026	T	C	T	C	0.125848	0.0259153	1.197e-06	0.0053	0.0137	0.7004	FALSE	TRUE
Cis-4-decenoate (10:1n6) levels	Alzheimer's disease	rs1458352	G	A	G	A	-0.087431	0.0183933	1.99998e-06	-0.0062	0.0099	0.5308	FALSE	TRUE
Cis-4-decenoate (10:1n6) levels	Alzheimer's disease	rs146431908	C	A	C	A	-0.370853	0.0802382	3.80249e-06	-0.1	0.0402	0.0129	FALSE	TRUE
Cis-4-decenoate (10:1n6) levels	Alzheimer's disease	rs149556176	C	T	C	T	0.395567	0.0640903	6.74191e-10	0.0249	0.0351	0.4791	FALSE	TRUE
Cis-4-decenoate (10:1n6) levels	Alzheimer's disease	rs2185152	T	C	T	C	-0.327315	0.015904	4.08321e-94	-0.0018	0.0088	0.8344	FALSE	TRUE
Cis-4-decenoate (10:1n6) levels	Alzheimer's disease	rs28415528	A	G	A	G	-0.409002	0.0157791	3.9094e-148	-0.0004	0.0088	0.9591	FALSE	TRUE
Cis-4-decenoate (10:1n6) levels	Alzheimer's disease	rs34904423	G	A	G	A	0.129069	0.0276017	2.92347e-06	0.0231	0.0145	0.1112	FALSE	TRUE
Cis-4-decenoate (10:1n6) levels	Alzheimer's disease	rs3935281	T	C	T	C	0.0705681	0.015813	8.09507e-06	0.0196	0.0084	0.0190599	FALSE	TRUE
Cis-4-decenoate (10:1n6) levels	Alzheimer's disease	rs41295332	T	C	T	C	0.142919	0.0321545	8.79866e-06	-0.0409	0.0184	0.0261601	FALSE	TRUE
Cis-4-decenoate (10:1n6) levels	Alzheimer's disease	rs4942210	C	T	C	T	-0.0704674	0.0153322	4.30615e-06	0.0069	0.0082	0.3968	FALSE	TRUE
Cis-4-decenoate (10:1n6) levels	Alzheimer's disease	rs55988623	G	A	G	A	0.134222	0.0295594	5.60529e-06	-0.0033	0.0162	0.8378	FALSE	TRUE
Cis-4-decenoate (10:1n6) levels	Alzheimer's disease	rs79795772	A	G	A	G	-0.175105	0.03881	6.42616e-06	-0.0123	0.0211	0.560899	FALSE	TRUE
Cis-4-decenoate (10:1n6) levels	Alzheimer's disease	rs876481	T	C	T	C	-0.0763818	0.0171627	8.56878e-06	0.0035	0.009	0.6971	FALSE	TRUE
X-11632 levels	Alzheimer's disease	rs10834273	G	A	G	A	0.0929781	0.0206986	7.05544e-06	-0.0127	0.0106	0.2331	FALSE	TRUE
X-11632 levels	Alzheimer's disease	rs115342498	T	C	T	C	0.262177	0.0540583	1.23526e-06	-0.0285	0.0257	0.2669	FALSE	TRUE
X-11632 levels	Alzheimer's disease	rs11624480	T	C	T	C	-0.115585	0.0245338	2.46204e-06	0.0129	0.0129	0.321	FALSE	TRUE
X-11632 levels	Alzheimer's disease	rs116249946	G	A	G	A	0.26689	0.0529932	4.74606e-07	-0.0034	0.03	0.9095	FALSE	TRUE
X-11632 levels	Alzheimer's disease	rs141195993	G	A	G	A	0.393955	0.0767741	2.87663e-07	0.0052	0.0361	0.8846	FALSE	TRUE
X-11632 levels	Alzheimer's disease	rs144816138	T	C	T	C	-0.378746	0.0734539	2.51958e-07	-0.0159	0.0394	0.687401	FALSE	TRUE
X-11632 levels	Alzheimer's disease	rs150565402	T	C	T	C	0.287268	0.0644903	8.41153e-06	0.018	0.0357	0.6141	FALSE	TRUE
X-11632 levels	Alzheimer's disease	rs2000103	G	T	G	T	0.0871676	0.0178947	1.10951e-06	-0.004	0.0092	0.668299	FALSE	TRUE
X-11632 levels	Alzheimer's disease	rs2071576	T	C	T	C	-0.108176	0.0199641	6.00818e-08	0.0029	0.011	0.7941	FALSE	TRUE
X-11632 levels	Alzheimer's disease	rs2626095	G	A	G	A	-0.162811	0.0362345	7.01451e-06	-0.0286	0.0189	0.1298	FALSE	TRUE
X-11632 levels	Alzheimer's disease	rs2901060	G	A	G	A	-0.0768133	0.0163175	2.50878e-06	0.0036	0.0085	0.668199	FALSE	TRUE
X-11632 levels	Alzheimer's disease	rs3125574	C	T	C	T	-0.174455	0.0385077	5.88722e-06	-0.0134	0.0192	0.4864	FALSE	TRUE
X-11632 levels	Alzheimer's disease	rs3851186	C	T	C	T	-0.0886677	0.0193476	4.58606e-06	-0.0123	0.0098	0.2105	FALSE	TRUE
X-11632 levels	Alzheimer's disease	rs4148324	G	T	G	T	-0.0893207	0.0168762	1.20522e-07	-0.0074	0.0086	0.3926	FALSE	TRUE
X-11632 levels	Alzheimer's disease	rs4328312	T	C	T	C	-0.0806999	0.0165346	1.05721e-06	0.0123	0.0085	0.1475	FALSE	TRUE
X-11632 levels	Alzheimer's disease	rs4593210	G	A	G	A	0.143192	0.0315029	5.48397e-06	0.0091	0.0151	0.5477	FALSE	TRUE
X-11632 levels	Alzheimer's disease	rs538423523	A	G	A	G	-0.274918	0.0604296	5.38018e-06	0.0143	0.0336	0.6705	FALSE	TRUE
X-11632 levels	Alzheimer's disease	rs6433613	T	C	T	C	-0.0802774	0.0177924	6.42541e-06	0.0099	0.0092	0.2832	FALSE	TRUE
X-11632 levels	Alzheimer's disease	rs7964236	G	A	G	A	-0.158739	0.031486	4.61698e-07	0.0234	0.0165	0.1563	FALSE	TRUE
X-11632 levels	Alzheimer's disease	rs9467515	G	A	G	A	0.0753887	0.0157242	1.6312e-06	0.0029	0.0082	0.7252	FALSE	TRUE
X-11632 levels	Alzheimer's disease	rs9509035	G	A	G	A	0.135242	0.029887	6.03694e-06	0.0057	0.0149	0.7006	FALSE	TRUE
X-11632 levels	Alzheimer's disease	rs983309	G	T	G	T	0.114918	0.0246318	3.07945e-06	-0.0024	0.013	0.8514	FALSE	TRUE
Branched chain 14:0 dicarboxylic acid levels	Alzheimer's disease	rs10022238	T	G	T	G	0.0800211	0.0176398	5.72257e-06	0.0116	0.0091	0.2	FALSE	TRUE
Branched chain 14:0 dicarboxylic acid levels	Alzheimer's disease	rs10171471	C	T	C	T	-0.0832226	0.017679	2.50855e-06	0.011	0.0091	0.226	FALSE	TRUE
Branched chain 14:0 dicarboxylic acid levels	Alzheimer's disease	rs11519068	C	T	C	T	0.105594	0.0213995	8.03897e-07	0.0102	0.0109	0.3477	FALSE	TRUE
Branched chain 14:0 dicarboxylic acid levels	Alzheimer's disease	rs117913606	A	G	A	G	-0.11798	0.0253981	3.39689e-06	0.0186	0.0143	0.1935	FALSE	TRUE
Branched chain 14:0 dicarboxylic acid levels	Alzheimer's disease	rs1293417	C	A	C	A	0.150881	0.0284231	1.10599e-07	0.0207	0.0148	0.1622	FALSE	TRUE
Branched chain 14:0 dicarboxylic acid levels	Alzheimer's disease	rs138275602	A	G	A	G	0.191072	0.0421586	5.83673e-06	-0.002	0.0223	0.9279	FALSE	TRUE
Branched chain 14:0 dicarboxylic acid levels	Alzheimer's disease	rs140412827	G	A	G	A	-0.281847	0.0636036	9.36642e-06	-0.0353	0.0321	0.2723	FALSE	TRUE
Branched chain 14:0 dicarboxylic acid levels	Alzheimer's disease	rs150967138	A	G	A	G	0.330149	0.0694143	1.97268e-06	0.0261	0.0386	0.5	FALSE	TRUE
Branched chain 14:0 dicarboxylic acid levels	Alzheimer's disease	rs191217354	A	G	A	G	0.436721	0.0930405	2.68074e-06	0.0216	0.0501	0.6666	FALSE	TRUE
Branched chain 14:0 dicarboxylic acid levels	Alzheimer's disease	rs2131280	A	G	A	G	0.0748798	0.016258	4.11053e-06	-0.0014	0.0083	0.8655	FALSE	TRUE
Branched chain 14:0 dicarboxylic acid levels	Alzheimer's disease	rs218547	A	C	A	C	0.0761571	0.0172394	9.97949e-06	-0.0035	0.0089	0.697301	FALSE	TRUE
Branched chain 14:0 dicarboxylic acid levels	Alzheimer's disease	rs71430371	C	T	C	T	-0.159554	0.035923	8.93081e-06	0.0142	0.0194	0.4631	FALSE	TRUE
Branched chain 14:0 dicarboxylic acid levels	Alzheimer's disease	rs72836123	T	C	T	C	0.2162	0.0472924	4.84117e-06	0.0015	0.0258	0.9541	FALSE	TRUE
Branched chain 14:0 dicarboxylic acid levels	Alzheimer's disease	rs72849177	G	A	G	A	-0.267559	0.0551049	1.20111e-06	-0.042	0.0295	0.1547	FALSE	TRUE
Branched chain 14:0 dicarboxylic acid levels	Alzheimer's disease	rs77176196	C	T	C	T	-0.263053	0.0592166	8.90347e-06	-0.0307	0.0294	0.2951	FALSE	TRUE
Branched chain 14:0 dicarboxylic acid levels	Alzheimer's disease	rs77794438	C	T	C	T	0.125831	0.0278056	6.02881e-06	0.0074	0.0147	0.6138	FALSE	TRUE
Branched chain 14:0 dicarboxylic acid levels	Alzheimer's disease	rs7982530	A	G	A	G	-0.085517	0.0191112	7.65141e-06	-0.0185	0.0096	0.0547205	FALSE	TRUE
Glycine conjugate of C10H12O2 levels	Alzheimer's disease	rs10022440	A	G	A	G	-0.14809	0.0328486	6.53577e-06	-0.0111	0.0158	0.4815	FALSE	TRUE
Glycine conjugate of C10H12O2 levels	Alzheimer's disease	rs11079433	A	G	A	G	-0.20101	0.042722	2.53778e-06	-0.0113	0.0189	0.55	FALSE	TRUE
Glycine conjugate of C10H12O2 levels	Alzheimer's disease	rs117906391	T	C	T	C	0.459555	0.0999661	4.28396e-06	-0.0317	0.0434	0.465	FALSE	TRUE
Glycine conjugate of C10H12O2 levels	Alzheimer's disease	rs12984891	T	C	T	C	0.0881042	0.0194182	5.70082e-06	0.0088	0.0096	0.3555	FALSE	TRUE
Glycine conjugate of C10H12O2 levels	Alzheimer's disease	rs144444233	A	G	A	G	0.0985305	0.0221957	9.03019e-06	-0.0119	0.0103	0.2458	FALSE	TRUE
Glycine conjugate of C10H12O2 levels	Alzheimer's disease	rs145833568	A	G	A	G	-0.315265	0.0685406	4.23136e-06	0.0519	0.0389	0.1818	FALSE	TRUE
Glycine conjugate of C10H12O2 levels	Alzheimer's disease	rs151329373	A	G	A	G	-0.329696	0.0728946	6.09931e-06	0.0534	0.0342	0.1189	FALSE	TRUE
Glycine conjugate of C10H12O2 levels	Alzheimer's disease	rs2065996	A	G	A	G	0.149179	0.0233265	1.60282e-10	0.0109	0.0106	0.3042	FALSE	TRUE
Glycine conjugate of C10H12O2 levels	Alzheimer's disease	rs2130525	C	T	C	T	-0.10661	0.0179462	2.84093e-09	-0.001	0.0084	0.9034	FALSE	TRUE
Glycine conjugate of C10H12O2 levels	Alzheimer's disease	rs35677007	A	G	A	G	-0.189375	0.040337	2.66861e-06	-0.0119	0.0184	0.517101	FALSE	TRUE
Glycine conjugate of C10H12O2 levels	Alzheimer's disease	rs4762373	A	G	A	G	-0.136593	0.0295055	3.66716e-06	-0.011	0.0139	0.4303	FALSE	TRUE
Glycine conjugate of C10H12O2 levels	Alzheimer's disease	rs526484	T	G	T	G	0.0802757	0.018043	8.62128e-06	-0.0021	0.0084	0.7999	FALSE	TRUE
Glycine conjugate of C10H12O2 levels	Alzheimer's disease	rs606511	C	T	C	T	-0.082122	0.0178248	4.08203e-06	0.0098	0.0082	0.2277	FALSE	TRUE
Glycine conjugate of C10H12O2 levels	Alzheimer's disease	rs62010506	A	G	A	G	-0.156561	0.0352154	8.75593e-06	0.0073	0.015	0.6271	FALSE	TRUE
Glycine conjugate of C10H12O2 levels	Alzheimer's disease	rs62481458	T	C	T	C	-0.240139	0.0527206	5.24002e-06	-0.0358	0.0247	0.1469	FALSE	TRUE
Glycine conjugate of C10H12O2 levels	Alzheimer's disease	rs62579131	A	G	A	G	0.175074	0.0393259	8.51284e-06	0.0057	0.0182	0.7556	FALSE	TRUE
Glycine conjugate of C10H12O2 levels	Alzheimer's disease	rs6681683	A	G	A	G	-0.100406	0.0211743	2.11757e-06	0.0018	0.0098	0.8545	FALSE	TRUE
Glycine conjugate of C10H12O2 levels	Alzheimer's disease	rs74650632	T	C	T	C	-0.24824	0.055598	8.01018e-06	-0.0091	0.0272	0.7373	FALSE	TRUE
Glycine conjugate of C10H12O2 levels	Alzheimer's disease	rs7620808	T	C	T	C	0.0780944	0.0176693	9.88048e-06	0.0044	0.0081	0.5923	FALSE	TRUE
Glycine conjugate of C10H12O2 levels	Alzheimer's disease	rs7820200	T	C	T	C	-0.161723	0.03577	6.14885e-06	-0.0099	0.0172	0.562999	FALSE	TRUE
Glycine conjugate of C10H12O2 levels	Alzheimer's disease	rs79374531	T	C	T	C	0.251085	0.0549737	4.93888e-06	-0.0099	0.027	0.7141	FALSE	TRUE
Glycine conjugate of C10H12O2 levels	Alzheimer's disease	rs9573827	C	T	C	T	-0.0801265	0.018025	8.77704e-06	0.0058	0.0084	0.4887	FALSE	TRUE
Glycine conjugate of C10H12O2 levels	Alzheimer's disease	rs9923144	C	T	C	T	-0.102638	0.0217264	2.31112e-06	-0.0161	0.01	0.1074	FALSE	TRUE
2-aminobutyrate levels	Alzheimer's disease	rs10022462	T	C	T	C	-0.122581	0.0156743	5.26012e-15	0.0021	0.0082	0.7948	FALSE	TRUE
2-aminobutyrate levels	Alzheimer's disease	rs111586617	A	G	A	G	-0.147973	0.0324829	5.22817e-06	0.0037	0.0169	0.8272	FALSE	TRUE
2-aminobutyrate levels	Alzheimer's disease	rs112662446	A	G	A	G	-0.246427	0.0554218	8.73251e-06	0.0195	0.0267	0.4664	FALSE	TRUE
2-aminobutyrate levels	Alzheimer's disease	rs113615864	T	C	T	C	0.24785	0.049091	4.44626e-07	0.0107	0.0264	0.6849	FALSE	TRUE
2-aminobutyrate levels	Alzheimer's disease	rs12978178	T	C	T	C	0.0951259	0.0214511	9.22679e-06	0.0165	0.0121	0.1717	FALSE	TRUE
2-aminobutyrate levels	Alzheimer's disease	rs148126430	A	G	A	G	-0.350572	0.0784769	7.925e-06	-0.0567	0.041	0.1665	FALSE	TRUE
2-aminobutyrate levels	Alzheimer's disease	rs1535465	A	G	A	G	0.068939	0.0155717	9.54599e-06	-0.0034	0.0082	0.679401	FALSE	TRUE
2-aminobutyrate levels	Alzheimer's disease	rs17111008	A	C	A	C	-0.135094	0.0303622	8.61095e-06	-0.0285	0.0159	0.0729693	FALSE	TRUE
2-aminobutyrate levels	Alzheimer's disease	rs17684887	C	T	C	T	0.224437	0.0507953	9.9403e-06	0.031	0.0273	0.2551	FALSE	TRUE
2-aminobutyrate levels	Alzheimer's disease	rs181042710	T	G	T	G	-0.285748	0.0591572	1.36318e-06	0.0089	0.0347	0.7979	FALSE	TRUE
2-aminobutyrate levels	Alzheimer's disease	rs188659719	A	G	A	G	0.0788247	0.0174871	6.55665e-06	0.0063	0.0091	0.4911	FALSE	TRUE
2-aminobutyrate levels	Alzheimer's disease	rs2160387	C	T	C	T	0.165412	0.0154725	1.12461e-26	-0.0123	0.0082	0.1354	FALSE	TRUE
2-aminobutyrate levels	Alzheimer's disease	rs3762577	T	G	T	G	0.087157	0.0183391	2.00899e-06	0.0146	0.0098	0.1378	FALSE	TRUE
2-aminobutyrate levels	Alzheimer's disease	rs6782881	T	G	T	G	0.165314	0.03693	7.59094e-06	0.017	0.0195	0.3813	FALSE	TRUE
2-aminobutyrate levels	Alzheimer's disease	rs7302925	G	A	G	A	-0.0953616	0.0188826	4.41236e-07	-0.0309	0.0099	0.00179201	FALSE	TRUE
2-aminobutyrate levels	Alzheimer's disease	rs7665697	T	C	T	C	0.08062	0.0177959	5.89095e-06	0.0026	0.0092	0.7792	FALSE	TRUE
2-aminobutyrate levels	Alzheimer's disease	rs78809926	G	A	G	A	-0.321599	0.0703347	4.82153e-06	0.0545	0.0343	0.1126	FALSE	TRUE
2-hydroxybutyrate/2-hydroxyisobutyrate levels	Alzheimer's disease	rs10022462	T	C	T	C	-0.0815387	0.0157023	2.07173e-07	0.0021	0.0082	0.7948	FALSE	TRUE
2-hydroxybutyrate/2-hydroxyisobutyrate levels	Alzheimer's disease	rs11582641	C	T	C	T	0.317474	0.0716162	9.29359e-06	-0.0397	0.0355	0.2646	FALSE	TRUE
2-hydroxybutyrate/2-hydroxyisobutyrate levels	Alzheimer's disease	rs115984300	C	T	C	T	-0.237423	0.0532224	8.15911e-06	0.0232	0.028	0.4068	FALSE	TRUE
2-hydroxybutyrate/2-hydroxyisobutyrate levels	Alzheimer's disease	rs117246538	A	G	A	G	0.263656	0.0579158	5.30342e-06	-0.0178	0.0283	0.5284	FALSE	TRUE
2-hydroxybutyrate/2-hydroxyisobutyrate levels	Alzheimer's disease	rs12639326	G	A	G	A	0.129097	0.0286991	6.85017e-06	0.0353	0.015	0.01894	FALSE	TRUE
2-hydroxybutyrate/2-hydroxyisobutyrate levels	Alzheimer's disease	rs12859068	T	C	T	C	0.120408	0.0260123	3.67649e-06	-0.0023	0.0128	0.8605	FALSE	TRUE
2-hydroxybutyrate/2-hydroxyisobutyrate levels	Alzheimer's disease	rs139590419	G	A	G	A	-0.294507	0.0646533	5.23416e-06	0.0097	0.0334	0.771101	FALSE	TRUE
2-hydroxybutyrate/2-hydroxyisobutyrate levels	Alzheimer's disease	rs148158000	A	G	A	G	-0.222032	0.0496307	7.68851e-06	-0.003	0.0272	0.9127	FALSE	TRUE
2-hydroxybutyrate/2-hydroxyisobutyrate levels	Alzheimer's disease	rs183194965	T	C	T	C	-0.417902	0.0852354	9.44255e-07	0.0093	0.044	0.8324	FALSE	TRUE
2-hydroxybutyrate/2-hydroxyisobutyrate levels	Alzheimer's disease	rs7181304	T	C	T	C	-0.0754319	0.0161058	2.8198e-06	0.0142	0.0084	0.0927897	FALSE	TRUE
2-hydroxybutyrate/2-hydroxyisobutyrate levels	Alzheimer's disease	rs76072104	A	C	A	C	0.240291	0.0536882	7.61692e-06	-0.0568	0.032	0.0760204	FALSE	TRUE
2-hydroxybutyrate/2-hydroxyisobutyrate levels	Alzheimer's disease	rs76968005	T	C	T	C	-0.318864	0.0718004	8.95501e-06	-0.0725	0.0344	0.0348297	FALSE	TRUE
2-hydroxybutyrate/2-hydroxyisobutyrate levels	Alzheimer's disease	rs780094	C	T	C	T	-0.0824749	0.0158312	1.89194e-07	-0.0177	0.0082	0.03185	FALSE	TRUE
2-hydroxybutyrate/2-hydroxyisobutyrate levels	Alzheimer's disease	rs79950608	T	C	T	C	0.166385	0.0372444	7.91811e-06	-0.0215	0.0193	0.2661	FALSE	TRUE
Isovalerylglycine levels	Alzheimer's disease	rs10022462	T	C	T	C	0.0925183	0.0169223	4.57077e-08	0.0021	0.0082	0.7948	FALSE	TRUE
Isovalerylglycine levels	Alzheimer's disease	rs1047891	A	C	A	C	0.219408	0.0179333	2.02945e-34	-0.004	0.0088	0.6482	FALSE	TRUE
Isovalerylglycine levels	Alzheimer's disease	rs10896190	C	T	C	T	-0.0827846	0.0169918	1.10451e-06	-0.0021	0.0083	0.7962	FALSE	TRUE
Isovalerylglycine levels	Alzheimer's disease	rs114538583	T	C	T	C	-0.366919	0.0815814	6.87284e-06	-0.0951	0.0379	0.01217	FALSE	TRUE
Isovalerylglycine levels	Alzheimer's disease	rs116953025	G	A	G	A	0.366846	0.0777071	2.34831e-06	-0.014	0.0352	0.6901	FALSE	TRUE
Isovalerylglycine levels	Alzheimer's disease	rs117786605	T	C	T	C	0.278184	0.0614991	6.08593e-06	0.0272	0.0292	0.3517	FALSE	TRUE
Isovalerylglycine levels	Alzheimer's disease	rs118143972	C	T	C	T	0.217786	0.0428227	3.66154e-07	-0.0068	0.0208	0.742499	FALSE	TRUE
Isovalerylglycine levels	Alzheimer's disease	rs151027355	T	G	T	G	-0.495118	0.107356	3.98956e-06	-0.0144	0.0444	0.7452	FALSE	TRUE
Isovalerylglycine levels	Alzheimer's disease	rs185102111	G	A	G	A	0.254545	0.0564407	6.48399e-06	0.0104	0.0321	0.747001	FALSE	TRUE
Isovalerylglycine levels	Alzheimer's disease	rs2271823	C	T	C	T	-0.0976133	0.0211542	3.94301e-06	0.0022	0.0103	0.8269	FALSE	TRUE
Isovalerylglycine levels	Alzheimer's disease	rs2731726	A	G	A	G	-0.0820643	0.0178326	4.18622e-06	0.0047	0.0087	0.5897	FALSE	TRUE
Isovalerylglycine levels	Alzheimer's disease	rs2979782	C	A	C	A	0.0942195	0.019524	1.39414e-06	0.0006	0.0092	0.9486	FALSE	TRUE
Isovalerylglycine levels	Alzheimer's disease	rs41271955	C	T	C	T	0.226072	0.0498104	5.66132e-06	0.0055	0.0226	0.8065	FALSE	TRUE
Isovalerylglycine levels	Alzheimer's disease	rs4822809	G	A	G	A	-0.0886904	0.018092	9.477e-07	0.0001	0.0087	0.9934	FALSE	TRUE
Isovalerylglycine levels	Alzheimer's disease	rs61729129	T	C	T	C	-0.257799	0.0582893	9.74537e-06	-0.0196	0.0305	0.5193	FALSE	TRUE
Isovalerylglycine levels	Alzheimer's disease	rs61766381	T	C	T	C	-0.106581	0.0241188	9.91654e-06	-0.009	0.0118	0.4453	FALSE	TRUE
Isovalerylglycine levels	Alzheimer's disease	rs6726136	C	A	C	A	-0.0761563	0.0171503	8.97376e-06	0.0049	0.0084	0.5536	FALSE	TRUE
Isovalerylglycine levels	Alzheimer's disease	rs6854192	T	C	T	C	0.13092	0.0246102	1.03899e-07	-0.0278	0.012	0.0207702	FALSE	TRUE
Isovalerylglycine levels	Alzheimer's disease	rs916821	G	A	G	A	0.644396	0.141244	5.05956e-06	0.0198	0.0559	0.723	FALSE	TRUE
Isovalerylglycine levels	Alzheimer's disease	rs943402	C	T	C	T	0.100668	0.0220408	4.93938e-06	-0.0084	0.0107	0.4331	FALSE	TRUE
Isovalerylglycine levels	Alzheimer's disease	rs9473939	G	T	G	T	0.129058	0.0269972	1.74929e-06	0.0143	0.0128	0.2654	FALSE	TRUE
Alpha-ketobutyrate levels	Alzheimer's disease	rs10022462	T	C	T	C	-0.0705048	0.0157398	7.48569e-06	0.0021	0.0082	0.7948	FALSE	TRUE
Alpha-ketobutyrate levels	Alzheimer's disease	rs11068128	T	G	T	G	-0.0751385	0.01616	3.32496e-06	-0.0056	0.0084	0.5064	FALSE	TRUE
Alpha-ketobutyrate levels	Alzheimer's disease	rs111994181	G	A	G	A	0.236112	0.050026	2.36104e-06	0.0036	0.0275	0.8951	FALSE	TRUE
Alpha-ketobutyrate levels	Alzheimer's disease	rs113615864	T	C	T	C	0.223167	0.0491657	5.65003e-06	0.0107	0.0264	0.6849	FALSE	TRUE
Alpha-ketobutyrate levels	Alzheimer's disease	rs116875736	A	G	A	G	-0.193273	0.0405663	1.8944e-06	-0.0176	0.0209	0.4	FALSE	TRUE
Alpha-ketobutyrate levels	Alzheimer's disease	rs117246538	A	G	A	G	0.263953	0.0579786	5.29865e-06	-0.0178	0.0283	0.5284	FALSE	TRUE
Alpha-ketobutyrate levels	Alzheimer's disease	rs1260326	C	T	C	T	-0.0736448	0.0158637	3.44485e-06	-0.0183	0.0082	0.0258	FALSE	TRUE
Alpha-ketobutyrate levels	Alzheimer's disease	rs131525	A	G	A	G	-0.0861332	0.0186434	3.83688e-06	-0.0196	0.0108	0.0679094	FALSE	TRUE
Alpha-ketobutyrate levels	Alzheimer's disease	rs142454772	T	C	T	C	-0.417743	0.0868685	1.51755e-06	-0.0261	0.0415	0.5294	FALSE	TRUE
Alpha-ketobutyrate levels	Alzheimer's disease	rs144727225	T	C	T	C	-0.227361	0.051156	8.81075e-06	-0.0326	0.0293	0.2661	FALSE	TRUE
Alpha-ketobutyrate levels	Alzheimer's disease	rs17132647	A	G	A	G	-0.115095	0.0249202	3.86449e-06	-0.0053	0.0137	0.702	FALSE	TRUE
Alpha-ketobutyrate levels	Alzheimer's disease	rs530515	G	T	G	T	0.070536	0.0158513	8.59269e-06	-0.003	0.0083	0.713001	FALSE	TRUE
Alpha-ketobutyrate levels	Alzheimer's disease	rs55854535	A	G	A	G	0.0966859	0.0218053	9.24758e-06	-0.0159	0.0114	0.1634	FALSE	TRUE
Alpha-ketobutyrate levels	Alzheimer's disease	rs559432	C	T	C	T	-0.0703454	0.0157248	7.6934e-06	-0.002	0.0088	0.8198	FALSE	TRUE
Alpha-ketobutyrate levels	Alzheimer's disease	rs744927	G	A	G	A	0.101148	0.0205994	9.09669e-07	-0.006	0.0109	0.5802	FALSE	TRUE
Alpha-ketobutyrate levels	Alzheimer's disease	rs75285293	C	T	C	T	0.213835	0.0480349	8.5211e-06	-0.0244	0.0272	0.3695	FALSE	TRUE
Alpha-ketobutyrate levels	Alzheimer's disease	rs79259434	G	T	G	T	0.21504	0.0467833	4.29637e-06	-0.0213	0.0256	0.407	FALSE	TRUE
Methyl glucopyranoside (alpha + beta) levels	Alzheimer's disease	rs10022619	T	C	T	C	-0.211174	0.0444573	2.03377e-06	0.0088	0.0214	0.6797	FALSE	TRUE
Methyl glucopyranoside (alpha + beta) levels	Alzheimer's disease	rs10914611	T	G	T	G	0.0923494	0.020829	9.26312e-06	0.0033	0.0108	0.758099	FALSE	TRUE
Methyl glucopyranoside (alpha + beta) levels	Alzheimer's disease	rs10970878	G	A	G	A	0.129338	0.0279764	3.78026e-06	-0.0027	0.014	0.8503	FALSE	TRUE
Methyl glucopyranoside (alpha + beta) levels	Alzheimer's disease	rs138464332	G	A	G	A	0.617431	0.120136	2.75551e-07	-0.0004	0.058	0.9948	FALSE	TRUE
Methyl glucopyranoside (alpha + beta) levels	Alzheimer's disease	rs144839122	T	C	T	C	0.401018	0.0903813	9.12393e-06	-0.004	0.0414	0.9226	FALSE	TRUE
Methyl glucopyranoside (alpha + beta) levels	Alzheimer's disease	rs145247878	T	C	T	C	0.216802	0.045042	1.4844e-06	-0.0163	0.0246	0.5063	FALSE	TRUE
Methyl glucopyranoside (alpha + beta) levels	Alzheimer's disease	rs150650682	G	A	G	A	1.414	0.312238	5.93792e-06	0.0524	0.092	0.5689	FALSE	TRUE
Methyl glucopyranoside (alpha + beta) levels	Alzheimer's disease	rs17542673	T	C	T	C	-0.161432	0.0334719	1.41486e-06	-0.0117	0.0182	0.5209	FALSE	TRUE
Methyl glucopyranoside (alpha + beta) levels	Alzheimer's disease	rs1896612	T	C	T	C	0.0869349	0.0194892	8.17024e-06	-0.0213	0.01	0.0329003	FALSE	TRUE
Methyl glucopyranoside (alpha + beta) levels	Alzheimer's disease	rs28380509	A	G	A	G	-0.108606	0.0235793	4.10541e-06	-0.0173	0.0127	0.1725	FALSE	TRUE
Methyl glucopyranoside (alpha + beta) levels	Alzheimer's disease	rs34391145	C	T	C	T	-0.0827048	0.0182566	5.89474e-06	0.0045	0.0096	0.6385	FALSE	TRUE
Methyl glucopyranoside (alpha + beta) levels	Alzheimer's disease	rs35220963	A	G	A	G	-0.167411	0.0356867	2.71696e-06	0.0252	0.0193	0.1916	FALSE	TRUE
Methyl glucopyranoside (alpha + beta) levels	Alzheimer's disease	rs358235	T	G	T	G	-0.541833	0.0216405	2.36182e-138	-0.0221	0.0112	0.0476804	FALSE	TRUE
Methyl glucopyranoside (alpha + beta) levels	Alzheimer's disease	rs3807839	C	T	C	T	-0.0808436	0.0180299	7.33068e-06	-0.017	0.0094	0.0705407	FALSE	TRUE
Methyl glucopyranoside (alpha + beta) levels	Alzheimer's disease	rs4283343	G	A	G	A	0.116537	0.0239773	1.17214e-06	0.021	0.0137	0.1269	FALSE	TRUE
Methyl glucopyranoside (alpha + beta) levels	Alzheimer's disease	rs56865238	T	C	T	C	0.121808	0.0256511	2.04806e-06	0.0011	0.0133	0.9322	FALSE	TRUE
Methyl glucopyranoside (alpha + beta) levels	Alzheimer's disease	rs73054327	C	T	C	T	0.165056	0.0362584	5.30804e-06	-0.0076	0.0183	0.6767	FALSE	TRUE
Methyl glucopyranoside (alpha + beta) levels	Alzheimer's disease	rs732658	A	G	A	G	0.0881076	0.0189866	3.47538e-06	-0.0018	0.01	0.858	FALSE	TRUE
Methyl glucopyranoside (alpha + beta) levels	Alzheimer's disease	rs74806771	A	G	A	G	-0.223026	0.049258	5.96261e-06	0.0147	0.0277	0.5955	FALSE	TRUE
Methyl glucopyranoside (alpha + beta) levels	Alzheimer's disease	rs757190	A	C	A	C	0.420462	0.0838004	5.2369e-07	-0.0249	0.0402	0.5349	FALSE	TRUE
Methyl glucopyranoside (alpha + beta) levels	Alzheimer's disease	rs77415901	T	C	T	C	-0.314247	0.0694602	6.06442e-06	-0.0274	0.0349	0.4314	FALSE	TRUE
Methyl glucopyranoside (alpha + beta) levels	Alzheimer's disease	rs960522	A	G	A	G	-0.0847312	0.0184987	4.6413e-06	0.0216	0.0094	0.0220201	FALSE	TRUE
Methyl glucopyranoside (alpha + beta) levels	Alzheimer's disease	rs9653416	T	C	T	C	0.0748698	0.0166831	7.1973e-06	-0.0191	0.0089	0.0318002	FALSE	TRUE
(2,4 or 2,5)-dimethylphenol sulfate levels	Alzheimer's disease	rs10023065	G	T	G	T	0.102591	0.0197019	1.91734e-07	-0.0021	0.0081	0.8	FALSE	TRUE
(2,4 or 2,5)-dimethylphenol sulfate levels	Alzheimer's disease	rs10810172	C	T	C	T	-0.10075	0.0227073	9.12759e-06	-0.0119	0.0093	0.2008	FALSE	TRUE
(2,4 or 2,5)-dimethylphenol sulfate levels	Alzheimer's disease	rs111852258	T	G	T	G	0.300687	0.0659385	5.11282e-06	-0.019	0.0283	0.5018	FALSE	TRUE
(2,4 or 2,5)-dimethylphenol sulfate levels	Alzheimer's disease	rs117703899	G	A	G	A	0.44153	0.0987405	7.76285e-06	-0.0133	0.0391	0.7348	FALSE	TRUE
(2,4 or 2,5)-dimethylphenol sulfate levels	Alzheimer's disease	rs11807515	T	C	T	C	0.26588	0.0568061	2.86192e-06	0.01	0.0224	0.6556	FALSE	TRUE
(2,4 or 2,5)-dimethylphenol sulfate levels	Alzheimer's disease	rs12890803	G	A	G	A	0.114538	0.0246252	3.29941e-06	-0.0114	0.0106	0.2816	FALSE	TRUE
(2,4 or 2,5)-dimethylphenol sulfate levels	Alzheimer's disease	rs139734134	C	T	C	T	0.367282	0.082586	8.69684e-06	-0.0095	0.0375	0.8002	FALSE	TRUE
(2,4 or 2,5)-dimethylphenol sulfate levels	Alzheimer's disease	rs146781516	T	C	T	C	0.379406	0.0834731	5.48715e-06	0.1187	0.0357	0.000896603	FALSE	TRUE
(2,4 or 2,5)-dimethylphenol sulfate levels	Alzheimer's disease	rs149129256	A	C	A	C	0.320784	0.0715821	7.41765e-06	-0.0664	0.0313	0.0340502	FALSE	TRUE
(2,4 or 2,5)-dimethylphenol sulfate levels	Alzheimer's disease	rs17091567	T	C	T	C	0.139455	0.0293474	2.01528e-06	-0.0212	0.0122	0.0831802	FALSE	TRUE
(2,4 or 2,5)-dimethylphenol sulfate levels	Alzheimer's disease	rs17155877	G	A	G	A	0.133345	0.0283851	2.63087e-06	-0.0064	0.0119	0.591701	FALSE	TRUE
(2,4 or 2,5)-dimethylphenol sulfate levels	Alzheimer's disease	rs1869349	T	C	T	C	-0.277332	0.0538763	2.63872e-07	0.0085	0.0236	0.7179	FALSE	TRUE
(2,4 or 2,5)-dimethylphenol sulfate levels	Alzheimer's disease	rs4238754	A	G	A	G	0.0898737	0.0197527	5.36602e-06	0.0053	0.0082	0.5179	FALSE	TRUE
(2,4 or 2,5)-dimethylphenol sulfate levels	Alzheimer's disease	rs72769224	T	G	T	G	-0.122423	0.0276725	9.68979e-06	0.0049	0.0115	0.6698	FALSE	TRUE
(2,4 or 2,5)-dimethylphenol sulfate levels	Alzheimer's disease	rs72795562	T	C	T	C	-0.300004	0.0664563	6.35233e-06	-0.0373	0.0279	0.1814	FALSE	TRUE
(2,4 or 2,5)-dimethylphenol sulfate levels	Alzheimer's disease	rs74923546	A	C	A	C	-0.152128	0.0331665	4.50142e-06	-0.0151	0.0136	0.2671	FALSE	TRUE
(2,4 or 2,5)-dimethylphenol sulfate levels	Alzheimer's disease	rs76673051	T	C	T	C	0.355803	0.0779472	5.00272e-06	-0.0036	0.0309	0.9075	FALSE	TRUE
(2,4 or 2,5)-dimethylphenol sulfate levels	Alzheimer's disease	rs76894499	T	G	T	G	0.190584	0.0404085	2.39999e-06	0.0037	0.0169	0.8278	FALSE	TRUE
(2,4 or 2,5)-dimethylphenol sulfate levels	Alzheimer's disease	rs9383616	A	G	A	G	0.153243	0.0290507	1.32751e-07	-0.0215	0.0121	0.0760204	FALSE	TRUE
(2,4 or 2,5)-dimethylphenol sulfate levels	Alzheimer's disease	rs9453530	T	G	T	G	0.101574	0.02285	8.77824e-06	0.0021	0.0095	0.824	FALSE	TRUE
X-12851 levels	Alzheimer's disease	rs10023688	T	C	T	C	0.0845451	0.0187687	6.65074e-06	0.0127	0.0092	0.17	FALSE	TRUE
X-12851 levels	Alzheimer's disease	rs112540923	T	C	T	C	0.259249	0.057043	5.4988e-06	-0.0692	0.0333	0.0374904	FALSE	TRUE
X-12851 levels	Alzheimer's disease	rs114109144	T	C	T	C	0.491238	0.100699	1.07016e-06	0.0257	0.0459	0.575	FALSE	TRUE
X-12851 levels	Alzheimer's disease	rs11743023	C	T	C	T	0.193151	0.0412676	2.86251e-06	-0.0072	0.0219	0.7418	FALSE	TRUE
X-12851 levels	Alzheimer's disease	rs12643735	A	G	A	G	-0.0944996	0.0205857	4.4209e-06	0.0159	0.0105	0.1307	FALSE	TRUE
X-12851 levels	Alzheimer's disease	rs1385511	G	A	G	A	-0.088475	0.0196168	6.47775e-06	-0.0021	0.0101	0.8323	FALSE	TRUE
X-12851 levels	Alzheimer's disease	rs1459391	T	C	T	C	0.108312	0.024102	6.99315e-06	0.0186	0.0124	0.1351	FALSE	TRUE
X-12851 levels	Alzheimer's disease	rs146860861	A	G	A	G	-0.193211	0.0345287	2.19756e-08	0.021	0.0172	0.2215	FALSE	TRUE
X-12851 levels	Alzheimer's disease	rs148132579	A	G	A	G	-0.111449	0.0246656	6.23141e-06	-0.0145	0.0134	0.2792	FALSE	TRUE
X-12851 levels	Alzheimer's disease	rs188614158	T	C	T	C	0.290305	0.0639769	5.68834e-06	0.0282	0.0349	0.419	FALSE	TRUE
X-12851 levels	Alzheimer's disease	rs190607410	T	C	T	C	-0.286904	0.0638554	7.02209e-06	0.0143	0.0345	0.677699	FALSE	TRUE
X-12851 levels	Alzheimer's disease	rs191477975	A	G	A	G	-0.432961	0.0887536	1.0704e-06	0.0626	0.0515	0.2239	FALSE	TRUE
X-12851 levels	Alzheimer's disease	rs1975407	A	G	A	G	-0.0758002	0.0167455	5.99427e-06	-0.0054	0.0084	0.518601	FALSE	TRUE
X-12851 levels	Alzheimer's disease	rs2072365	T	C	T	C	-0.0921189	0.0170468	6.52176e-08	-0.0034	0.0085	0.69	FALSE	TRUE
X-12851 levels	Alzheimer's disease	rs281377	T	C	T	C	-0.0828835	0.0161404	2.81928e-07	-0.0114	0.0087	0.1874	FALSE	TRUE
X-12851 levels	Alzheimer's disease	rs4625592	G	A	G	A	0.0742436	0.0163418	5.54117e-06	-0.0033	0.0082	0.684	FALSE	TRUE
X-12851 levels	Alzheimer's disease	rs72848086	T	G	T	G	-0.209025	0.0458897	5.23988e-06	0.0167	0.0239	0.4859	FALSE	TRUE
X-12851 levels	Alzheimer's disease	rs76434393	C	T	C	T	0.26218	0.0593414	9.95448e-06	-0.0217	0.0359	0.5459	FALSE	TRUE
X-12851 levels	Alzheimer's disease	rs78517573	C	T	C	T	0.166313	0.0371715	7.67009e-06	0.0006	0.019	0.9734	FALSE	TRUE
Serine levels	Alzheimer's disease	rs1002607	C	T	C	T	-0.078572	0.0156171	4.87509e-07	0.0025	0.0083	0.764901	FALSE	TRUE
Serine levels	Alzheimer's disease	rs1047891	A	C	A	C	0.205086	0.016246	1.56139e-36	-0.004	0.0088	0.6482	FALSE	TRUE
Serine levels	Alzheimer's disease	rs11214896	A	G	A	G	-0.0846707	0.0175926	1.48797e-06	0.0025	0.0095	0.7894	FALSE	TRUE
Serine levels	Alzheimer's disease	rs113117335	T	G	T	G	0.0915971	0.0204917	7.82366e-06	-0.0001	0.0111	0.9962	FALSE	TRUE
Serine levels	Alzheimer's disease	rs11638845	G	T	G	T	-0.0694867	0.0153619	6.08758e-06	0.0075	0.0083	0.3636	FALSE	TRUE
Serine levels	Alzheimer's disease	rs116434634	A	C	A	C	0.243771	0.0503985	1.31898e-06	-0.0407	0.0264	0.1236	FALSE	TRUE
Serine levels	Alzheimer's disease	rs1205042	T	C	T	C	-0.146472	0.0307108	1.84795e-06	-0.0126	0.0165	0.4449	FALSE	TRUE
Serine levels	Alzheimer's disease	rs12404355	T	C	T	C	0.240845	0.0517649	3.27657e-06	0.018	0.0316	0.569101	FALSE	TRUE
Serine levels	Alzheimer's disease	rs12659929	G	A	G	A	0.0945102	0.0208132	5.60212e-06	0.0006	0.011	0.9533	FALSE	TRUE
Serine levels	Alzheimer's disease	rs13136680	C	T	C	T	0.165376	0.0359606	4.24912e-06	-0.0424	0.0198	0.0324198	FALSE	TRUE
Serine levels	Alzheimer's disease	rs141999665	G	A	G	A	0.284405	0.0620866	4.63237e-06	0.0273	0.0327	0.405	FALSE	TRUE
Serine levels	Alzheimer's disease	rs145457809	G	A	G	A	0.291453	0.0623409	2.93745e-06	0.0452	0.0318	0.156	FALSE	TRUE
Serine levels	Alzheimer's disease	rs146953046	G	T	G	T	-0.303594	0.0685252	9.40578e-06	0.0308	0.0366	0.4002	FALSE	TRUE
Serine levels	Alzheimer's disease	rs149220021	A	G	A	G	-0.2995	0.0670995	8.06219e-06	0.0585	0.0377	0.1209	FALSE	TRUE
Serine levels	Alzheimer's disease	rs149814267	A	G	A	G	-0.310411	0.0630565	8.53349e-07	0.0434	0.0355	0.2217	FALSE	TRUE
Serine levels	Alzheimer's disease	rs150646171	A	G	A	G	-0.436211	0.0951476	4.5493e-06	0.0313	0.0523	0.549301	FALSE	TRUE
Serine levels	Alzheimer's disease	rs155501	G	T	G	T	-0.0783591	0.0175405	7.92008e-06	-0.0061	0.0095	0.5223	FALSE	TRUE
Serine levels	Alzheimer's disease	rs168020	A	C	A	C	0.0672433	0.0152134	9.87022e-06	0.0084	0.0082	0.3042	FALSE	TRUE
Serine levels	Alzheimer's disease	rs17428922	C	A	C	A	0.113125	0.0252237	7.29579e-06	-0.001	0.0142	0.9453	FALSE	TRUE
Serine levels	Alzheimer's disease	rs2344872	T	C	T	C	-0.0931895	0.0203471	4.64995e-06	-0.0131	0.011	0.2341	FALSE	TRUE
Serine levels	Alzheimer's disease	rs35780223	T	C	T	C	-0.166662	0.0338282	8.36243e-07	0.0041	0.0192	0.8321	FALSE	TRUE
Serine levels	Alzheimer's disease	rs4382808	G	A	G	A	-0.0778347	0.0174809	8.48582e-06	-0.0084	0.0095	0.3722	FALSE	TRUE
Serine levels	Alzheimer's disease	rs4553269	T	C	T	C	-0.0944099	0.0203595	3.53244e-06	0.0085	0.0108	0.432	FALSE	TRUE
Serine levels	Alzheimer's disease	rs561931	G	A	G	A	0.182917	0.0153145	6.97391e-33	-0.0182	0.0083	0.0280498	FALSE	TRUE
Serine levels	Alzheimer's disease	rs56335308	A	G	A	G	0.231549	0.0484332	1.7461e-06	0.0207	0.0277	0.4556	FALSE	TRUE
Serine levels	Alzheimer's disease	rs6461757	G	A	G	A	0.0765078	0.0154594	7.4611e-07	-0.0146	0.0083	0.0803008	FALSE	TRUE
Serine levels	Alzheimer's disease	rs6856689	A	G	A	G	-0.159359	0.0328373	1.21605e-06	-0.0069	0.0167	0.681	FALSE	TRUE
Serine levels	Alzheimer's disease	rs7046643	G	A	G	A	-0.0808848	0.0179564	6.65268e-06	-0.0034	0.0095	0.724399	FALSE	TRUE
Serine levels	Alzheimer's disease	rs738161	A	C	A	C	-0.0679003	0.0151681	7.58714e-06	0.0135	0.0082	0.0994604	FALSE	TRUE
Serine levels	Alzheimer's disease	rs75859613	C	T	C	T	-0.225105	0.0432815	1.98282e-07	0.0451	0.0238	0.0582103	FALSE	TRUE
Serine levels	Alzheimer's disease	rs7628649	C	T	C	T	-0.112407	0.0246823	5.25999e-06	-0.0083	0.0127	0.5118	FALSE	TRUE
Serine levels	Alzheimer's disease	rs77195831	C	T	C	T	-0.1436	0.0324811	9.82353e-06	-0.0129	0.0176	0.4643	FALSE	TRUE
Serine levels	Alzheimer's disease	rs780093	C	T	C	T	0.076895	0.0153949	5.88852e-07	-0.0168	0.0082	0.0421803	FALSE	TRUE
Serine levels	Alzheimer's disease	rs816411	T	C	T	C	-0.148474	0.0150358	5.35888e-23	0.0017	0.0081	0.8361	FALSE	TRUE
Serine to alpha-tocopherol ratio	Alzheimer's disease	rs1002607	C	T	C	T	-0.0725343	0.015789	4.34906e-06	0.0025	0.0083	0.764901	FALSE	TRUE
Serine to alpha-tocopherol ratio	Alzheimer's disease	rs1047891	A	C	A	C	0.138513	0.0165234	5.16729e-17	-0.004	0.0088	0.6482	FALSE	TRUE
Serine to alpha-tocopherol ratio	Alzheimer's disease	rs117062942	T	G	T	G	0.23872	0.0504342	2.20895e-06	-0.0069	0.0287	0.8105	FALSE	TRUE
Serine to alpha-tocopherol ratio	Alzheimer's disease	rs117077569	C	T	C	T	0.245239	0.0555058	9.94977e-06	-0.0129	0.0298	0.6647	FALSE	TRUE
Serine to alpha-tocopherol ratio	Alzheimer's disease	rs117704046	T	C	T	C	-0.235834	0.0510355	3.81934e-06	-0.0747	0.0275	0.00647799	FALSE	TRUE
Serine to alpha-tocopherol ratio	Alzheimer's disease	rs12580691	C	T	C	T	-0.238552	0.0537275	8.99479e-06	0.0266	0.0291	0.3606	FALSE	TRUE
Serine to alpha-tocopherol ratio	Alzheimer's disease	rs1260326	C	T	C	T	0.0789013	0.0155471	3.87557e-07	-0.0183	0.0082	0.0258	FALSE	TRUE
Serine to alpha-tocopherol ratio	Alzheimer's disease	rs13325784	A	G	A	G	-0.135062	0.028996	3.19366e-06	-0.0009	0.0149	0.954	FALSE	TRUE
Serine to alpha-tocopherol ratio	Alzheimer's disease	rs139101151	G	A	G	A	-0.284063	0.0637679	8.40371e-06	0.0131	0.0358	0.713801	FALSE	TRUE
Serine to alpha-tocopherol ratio	Alzheimer's disease	rs142498030	T	C	T	C	0.283613	0.0628259	6.35365e-06	0.0102	0.0334	0.759401	FALSE	TRUE
Serine to alpha-tocopherol ratio	Alzheimer's disease	rs145818332	A	G	A	G	-0.336104	0.0745042	6.44592e-06	0.0591	0.0416	0.1554	FALSE	TRUE
Serine to alpha-tocopherol ratio	Alzheimer's disease	rs1669587	G	A	G	A	-0.0751917	0.0163507	4.25169e-06	-0.0017	0.0087	0.8403	FALSE	TRUE
Serine to alpha-tocopherol ratio	Alzheimer's disease	rs561931	G	A	G	A	0.11386	0.0155407	2.36157e-13	-0.0182	0.0083	0.0280498	FALSE	TRUE
Serine to alpha-tocopherol ratio	Alzheimer's disease	rs58322339	A	C	A	C	-0.0792109	0.0177838	8.42441e-06	-0.0008	0.0096	0.9354	FALSE	TRUE
Serine to alpha-tocopherol ratio	Alzheimer's disease	rs62010860	C	A	C	A	0.0886643	0.0189566	2.90768e-06	0.0035	0.01	0.726999	FALSE	TRUE
Serine to alpha-tocopherol ratio	Alzheimer's disease	rs62090037	G	A	G	A	0.0891285	0.0198602	7.1968e-06	0.0049	0.0106	0.645	FALSE	TRUE
Serine to alpha-tocopherol ratio	Alzheimer's disease	rs631106	A	C	A	C	0.0771473	0.0162302	2.00099e-06	0.023	0.0087	0.00841705	FALSE	TRUE
Serine to alpha-tocopherol ratio	Alzheimer's disease	rs6576576	A	G	A	G	0.135704	0.0303783	7.92762e-06	-0.0037	0.0156	0.8151	FALSE	TRUE
Serine to alpha-tocopherol ratio	Alzheimer's disease	rs7251874	G	A	G	A	-0.0765961	0.0153359	5.89745e-07	-0.0046	0.0088	0.5993	FALSE	TRUE
Serine to alpha-tocopherol ratio	Alzheimer's disease	rs75860931	G	A	G	A	0.181581	0.0399077	5.36399e-06	-0.0042	0.0216	0.8471	FALSE	TRUE
Serine to alpha-tocopherol ratio	Alzheimer's disease	rs7589968	A	G	A	G	-0.074581	0.0162898	4.68585e-06	-0.009	0.0085	0.2919	FALSE	TRUE
Serine to alpha-tocopherol ratio	Alzheimer's disease	rs76772514	T	G	T	G	-0.239418	0.0519939	4.12998e-06	0.0689	0.0266	0.00963097	FALSE	TRUE
Serine to alpha-tocopherol ratio	Alzheimer's disease	rs895789	C	A	C	A	-0.072227	0.0153711	2.61581e-06	-0.0011	0.0082	0.8961	FALSE	TRUE
Serine to alpha-tocopherol ratio	Alzheimer's disease	rs9606482	C	T	C	T	0.235354	0.0517754	5.47616e-06	-0.0132	0.0251	0.598199	FALSE	TRUE
3-hydroxydecanoylcarnitine levels	Alzheimer's disease	rs10026304	G	A	G	A	-0.119442	0.0267982	8.30844e-06	0.005	0.0142	0.724599	FALSE	TRUE
3-hydroxydecanoylcarnitine levels	Alzheimer's disease	rs1049987	T	C	T	C	0.0944784	0.0184134	2.8828e-07	0.0023	0.01	0.8168	FALSE	TRUE
3-hydroxydecanoylcarnitine levels	Alzheimer's disease	rs11018118	A	G	A	G	0.122806	0.0256405	1.67162e-06	0.0031	0.0138	0.8214	FALSE	TRUE
3-hydroxydecanoylcarnitine levels	Alzheimer's disease	rs114008126	T	C	T	C	0.153932	0.0337237	5.00697e-06	0.0024	0.0193	0.9027	FALSE	TRUE
3-hydroxydecanoylcarnitine levels	Alzheimer's disease	rs117441042	A	G	A	G	-0.408542	0.0783053	1.8155e-07	-0.0134	0.0339	0.692599	FALSE	TRUE
3-hydroxydecanoylcarnitine levels	Alzheimer's disease	rs118186615	G	A	G	A	-0.282131	0.0629879	7.49514e-06	-0.0384	0.0344	0.2638	FALSE	TRUE
3-hydroxydecanoylcarnitine levels	Alzheimer's disease	rs141744418	T	G	T	G	0.150937	0.0332624	5.68537e-06	-0.0265	0.0186	0.153	FALSE	TRUE
3-hydroxydecanoylcarnitine levels	Alzheimer's disease	rs144234122	G	A	G	A	-0.431115	0.0942678	4.80088e-06	0.0653	0.0498	0.1898	FALSE	TRUE
[truncated: 27,962 more rows]

## Sheet: Table S4
Table S4: Extracted SNP of MR analysis( Immune cell traits to Blood metabolites)
[truncated: 282 more rows]
